# Supplementary material for: Integrated transcriptome and metabolome analyses revealed regulatory mechanisms of flavonoid biosynthesis in Radix Ardisia
Source: PeerJ. 2022 Jun 29;10:e13670. doi: 10.7717/peerj.13670 (PMC9250311; doi:10.7717/peerj.13670)
Supplement: Supplemental Information 4 [file peerj-10-13670-s004.xls]

## Sheet: Table S1
Table S1 Statistical analysis of RNA-Seq data between ACS and AC.
#ID	ACS1_count	ACS1_FPKM	ACS2_count	ACS2_FPKM	ACS3_count	ACS3_FPKM	ACS4_count	ACS4_FPKM	ACS5_count	ACS5_FPKM	ACS6_count	ACS6_FPKM	AC7_count	AC7_FPKM	AC8_count	AC8_FPKM	AC9_count	AC9_FPKM	AC10_count	AC10_FPKM	AC11_count	AC11_FPKM	AC12_count	AC12_FPKM
BMK_Unigene_000001	13	2.15	0	0	4	0.79	0	0	8	1.77	4	0.81	0	0	0	0	7	1.05	10	1.66	0	0	1	0.15
BMK_Unigene_000002	1325	25.68	2376	47.18	577	13.38	874	20.38	408	10.99	1055	24.72	513	10.34	825	19.11	114	1.96	339	6.73	284	5.52	200	3.6
BMK_Unigene_000005	587	13.27	1172	27.13	86	2.32	94	2.58	3314	103.8	208	5.68	607	14.27	268	7.23	52	1.06	67	1.55	283	6.43	529	11.11
BMK_Unigene_000011	0	0	3	0.97	0	0	0	0	5	2.05	0	0	0	0	0	0	2	0.58	0	0	1	0.3	2	0.56
BMK_Unigene_000012	32	1.14	84	3.04	24	1.01	3	0.13	14	0.69	38	1.65	2	0.07	17	0.74	9	0.28	16	0.59	31	1.12	27	0.89
BMK_Unigene_000016	679	9	677	9.2	374	5.94	274	4.37	779	14.35	382	6.13	467	6.44	711	11.27	774	9.1	542	7.36	578	7.7	704	8.69
BMK_Unigene_000018	0	0	9	2.24	0	0	6	1.78	0	0	0	0	0	0	0	0	0	0	0	0	0	0	3	0.65
BMK_Unigene_000022	158	4.4	63	1.8	114	3.79	209	7	89	3.47	128	4.31	117	3.38	91	3.02	437	10.83	284	8.07	359	10.01	306	7.93
BMK_Unigene_000023	2	0.18	0	0	18	1.89	2	0.21	4	0.48	13	1.39	0	0	2	0.21	0	0	0	0	1	0.09	0	0
BMK_Unigene_000025	1	0.1	13	1.4	4	0.5	22	2.79	0	0	9	1.15	0	0	0	0	2	0.19	5	0.53	0	0	0	0
BMK_Unigene_000026	98	1.55	81	1.32	62	1.19	79	1.52	79	1.74	84	1.61	857	14.12	544	10.32	1944	27.31	775	12.57	1197	19.03	1761	25.94
BMK_Unigene_000029	0	0	0	0	4	1.23	0	0	0	0	5	1.59	15	3.93	7	2.02	1	0.24	0	0	8	2.01	0	0
BMK_Unigene_000033	0	0	0	0	5	0.51	0	0	0	0	0	0	0	0	0	0	31	2.38	0	0	0	0	0	0
BMK_Unigene_000035	1421	13.25	919	8.79	1001	11.16	1797	20.14	898	11.66	1278	14.4	109	1.06	79	0.89	317	2.62	221	2.11	85	0.81	102	0.89
BMK_Unigene_000036	0	0	4	1.56	0	0	0	0	0	0	0	0	0	0	0	0	8	2.82	0	0	0	0	0	0
BMK_Unigene_000037	0	0	0	0	0	0	15	2.5	0	0	0	0	0	0	0	0	3	0.37	12	1.66	1	0.14	13	1.63
BMK_Unigene_000043	12	1.08	21	1.94	1	0.11	14	1.52	3	0.37	8	0.87	20	1.86	63	6.64	14	1.13	20	1.82	26	2.33	53	4.44
BMK_Unigene_000045	783	14.62	892	17.07	718	16.03	967	21.72	565	14.68	1095	24.73	1079	20.97	833	18.61	2033	33.71	2800	53.49	1976	37.03	1505	26.14
BMK_Unigene_000047	148	4.44	273	8.38	92	3.31	181	6.52	129	5.36	242	8.77	461	14.35	401	14.32	1252	33.32	1205	36.85	826	24.79	652	18.12
BMK_Unigene_000048	0	0	2	0.82	0	0	0	0	0	0	0	0	0	0	0	0	1	0.37	9	3.5	0	0	0	0
BMK_Unigene_000051	7	2.52	0	0	0	0	0	0	0	0	0	0	0	0	6	2.34	0	0	0	0	1	0.34	0	0
BMK_Unigene_000055	316	6.02	324	6.32	464	10.56	579	13.25	102	2.69	463	10.65	50	1	60	1.36	6	0.11	118	2.3	38	0.73	49	0.87
BMK_Unigene_000057	4	1.48	0	0	0	0	0	0	0	0	0	0	0	0	10	4.01	0	0	0	0	0	0	0	0
BMK_Unigene_000064	0	0	0	0	7	1.03	15	2.26	0	0	6	0.91	8	1.02	2	0.29	0	0	2	0.25	0	0	8	0.91
BMK_Unigene_000069	21	2.85	22	3.06	3	0.48	15	2.47	2	0.37	10	1.65	0	0	2	0.31	0	0	0	0	0	0	0	0
BMK_Unigene_000070	2	0.08	1	0.04	1	0.05	0	0	2	0.11	0	0	0	0	39	1.93	3	0.11	18	0.76	34	1.41	18	0.69
BMK_Unigene_000075	171	55.64	238	79.5	159	61.09	278	110.63	63	26.49	138	55.21	330	107.69	103	36.87	33	10.09	264	84.17	132	41.29	95	27.4
BMK_Unigene_000076	65	1.52	9	0.22	5	0.14	34	0.96	66	2.15	10	0.3	149	3.64	172	4.81	203	4.23	279	6.67	163	3.82	267	5.8
BMK_Unigene_000077	1	0.33	2	0.69	0	0	0	0	5	2.16	0	0	2	0.67	11	4.01	3	0.93	1	0.33	0	0	6	1.76
BMK_Unigene_000078	0	0	3	0.76	0	0	0	0	0	0	2	0.6	11	2.74	0	0	6	1.35	6	1.5	8	1.91	0	0
BMK_Unigene_000079	5	0.93	2	0.38	1	0.22	0	0	0	0	1	0.23	5	0.95	0	0	0	0	1	0.19	2	0.37	15	2.53
BMK_Unigene_000085	0	0	0	0	2453	70.14	0	0	0	0	3179	91.94	977	24.3	808	23.08	369	7.84	1686	41.24	1878	45.06	1098	24.42
BMK_Unigene_000091	1	0.12	0	0	0	0	0	0	0	0	0	0	5	0.61	0	0	4	0.43	18	2.15	2	0.23	0	0
BMK_Unigene_000094	93	1.96	170	3.67	50	1.26	153	3.86	118	3.46	64	1.63	84	1.85	87	2.2	143	2.67	131	2.83	134	2.82	130	2.54
BMK_Unigene_000095	507	7.16	406	5.87	94	1.6	47	0.81	340	6.67	104	1.78	872	12.8	822	13.88	1401	17.53	983	14.19	1205	17.07	988	12.98
BMK_Unigene_000101	12	0.25	15	0.3	5	0.12	17	0.41	0	0	36	0.84	1105	22.04	219	5.02	89	1.52	180	3.54	423	8.16	50	0.89
BMK_Unigene_000105	0	0	0	0	5	0.19	4	0.14	0	0	1	0.03	296	8.05	226	7.04	404	9.38	216	5.77	375	9.83	367	8.9
BMK_Unigene_000107	2	0.39	1	0.2	0	0	0	0	5	1.31	0	0	7	1.4	1	0.22	0	0	15	3.13	6	1.16	2	0.35
BMK_Unigene_000110	13	0.76	14	0.84	8	0.56	22	1.55	5	0.46	18	1.34	22	1.33	29	2	67	3.53	16	0.95	39	2.27	28	1.52
BMK_Unigene_000111	798	27.05	626	21.75	568	22.99	497	20.3	574	26.94	543	22.29	338	11.9	167	6.74	1413	42.62	460	15.92	467	15.88	276	8.68
BMK_Unigene_000112	4	1.6	0	0	0	0	0	0	2	1.02	0	0	0	0	0	0	0	0	0	0	0	0	6	2.09
BMK_Unigene_000116	0	0	0	0	0	0	0	0	5	1.8	0	0	0	0	0	0	0	0	0	0	0	0	2	0.49
BMK_Unigene_000121	0	0	0	0	0	0	0	0	6	1.68	1	0.26	13	2.8	1	0.24	0	0	8	1.69	8	1.65	0	0
BMK_Unigene_000126	243	4.84	129	2.65	150	3.58	303	7.28	138	3.82	147	3.56	877	18.17	1058	25.18	1243	21.98	1537	31.3	950	18.99	1044	19.33
BMK_Unigene_000130	734	22.95	798	25.58	623	23.3	510	19.24	1096	47.46	651	24.65	1458	47.37	1415	52.7	1562	43.46	1533	48.96	1525	47.79	1525	44.26
BMK_Unigene_000133	97	28.14	105	31.28	67	22.99	81	28.74	105	39.72	95	33.88	92	26.93	92	29.52	122	32.55	183	52.35	159	44.63	90	23.14
BMK_Unigene_000140	0	0	3	0.79	0	0	0	0	0	0	0	0	0	0	1	0.29	4	0.94	5	1.26	0	0	8	1.82
BMK_Unigene_000141	326	10.55	607	20.16	162	6.27	101	3.94	381	17.1	159	6.23	134	4.51	206	7.96	195	5.63	158	5.23	114	3.7	235	7.06
BMK_Unigene_000144	33	4.18	35	4.55	25	3.77	34	5.22	41	7.1	43	6.63	80	10.48	74	10.86	42	4.8	62	8	61	7.64	62	7.16
BMK_Unigene_000145	0	0	0	0	2	0.17	1	0.08	0	0	2	0.17	11	0.79	12	0.98	29	1.81	50	3.54	22	1.53	37	2.38
BMK_Unigene_000155	67	1.16	48	0.86	23	0.49	20	0.42	66	1.59	21	0.45	624	11.18	418	8.61	670	10.24	540	9.53	590	10.21	640	10.26
BMK_Unigene_000156	11	2.14	6	1.2	1	0.23	0	0	6	1.55	0	0	0	0	0	0	0	0	0	0	0	0	5	0.87
BMK_Unigene_000159	6	0.14	34	0.8	11	0.3	9	0.25	15	0.48	20	0.55	178	4.23	155	4.24	193	3.92	249	5.82	276	6.31	207	4.4
BMK_Unigene_000165	0	0	0	0	13	2.6	8	1.63	0	0	1	0.21	0	0	0	0	0	0	0	0	0	0	0	0
BMK_Unigene_000168	0	0	2	0.17	0	0	2	0.25	0	0	1	0.1	28	2.38	2	0.19	7	0.52	3	0.25	0	0	12	0.91
BMK_Unigene_000170	1730	22.48	1136	15.12	1748	27.14	2118	33.09	742	13.42	1582	24.83	396	5.35	446	6.94	770	8.88	451	6.01	372	4.86	686	8.3
BMK_Unigene_000172	0	0	5	1.01	7	1.64	4	0.96	8	2.1	1	0.24	0	0	0	0	0	0	0	0	0	0	0	0
BMK_Unigene_000173	1	0.21	0	0	0	0	0	0	1	0.27	0	0	0	0	10	2.34	24	4.53	0	0	1	0.2	0	0
BMK_Unigene_000175	6	0.79	2	0.27	1	0.16	5	0.8	0	0	3	0.48	27	3.64	1	0.15	5	0.59	3	0.4	0	0	9	1.08
BMK_Unigene_000178	1	0.01	7	0.1	21	0.34	7	0.11	14	0.26	6	0.1	162	2.27	78	1.27	82	0.99	101	1.4	140	1.9	140	1.77
BMK_Unigene_000180	75	1.03	101	1.41	39	0.64	37	0.61	65	1.24	95	1.58	207	2.94	273	4.46	280	3.38	369	5.15	373	5.1	268	3.4
BMK_Unigene_000184	0	0	0	0	0	0	0	0	0	0	0	0	0	0	0	0	0	0	0	0	0	0	10	3.46
BMK_Unigene_000185	842	14.42	458	8.04	361	7.39	81	1.67	298	7.09	238	4.93	147	2.62	268	5.49	27	0.41	60	1.05	86	1.49	239	3.82
BMK_Unigene_000186	0	0	0	0	0	0	4	0.38	0	0	0	0	0	0	0	0	0	0	0	0	1	0.08	30	2.18
BMK_Unigene_000192	0	0	0	0	0	0	0	0	6	2.06	0	0	0	0	0	0	1	0.24	4	1.04	0	0	10	2.33
BMK_Unigene_000193	0	0	0	0	5	1.62	0	0	0	0	2	0.67	0	0	0	0	11	2.77	2	0.54	0	0	17	4.14
BMK_Unigene_000194	0	0	0	0	0	0	0	0	0	0	0	0	0	0	0	0	0	0	0	0	6	2.14	0	0
BMK_Unigene_000197	14	0.23	13	0.22	111	2.18	18	0.36	2	0.05	125	2.48	25	0.43	18	0.36	5	0.07	171	2.89	19	0.31	37	0.57
BMK_Unigene_000200	15	1.05	10	0.72	27	2.25	11	0.93	9	0.9	35	2.97	3	0.22	18	1.48	29	1.82	21	1.49	29	2.02	47	3.03
BMK_Unigene_000202	8	0.12	21	0.33	26	0.46	5	0.09	28	0.57	19	0.34	885	13.38	872	15.16	363	4.68	519	7.73	1235	18.03	1158	15.66
BMK_Unigene_000204	1	0.34	1	0.35	0	0	0	0	0	0	0	0	0	0	0	0	2	0.63	4	1.35	7	2.31	3	0.9
BMK_Unigene_000206	0	0	5	1.87	0	0	0	0	0	0	0	0	0	0	0	0	0	0	0	0	2	0.7	2	0.64
BMK_Unigene_000207	105	2.29	302	6.74	94	2.46	195	5.12	130	3.94	164	4.32	1671	37.78	1121	29.11	1246	24.08	644	14.32	1087	23.72	1708	34.52
BMK_Unigene_000208	0	0	8	1.79	0	0	0	0	0	0	0	0	3	0.66	0	0	0	0	1	0.22	4	0.85	3	0.59
BMK_Unigene_000209	2547	246.46	5701	565.24	1096	126.36	888	103.99	3060	402.7	3608	423.92	285	28.46	967	109.31	35	3.07	102	10.06	90	8.69	80	7.15
BMK_Unigene_000211	0	0	0	0	746	29.82	0	0	1	0.05	615	24.91	811	28.15	920	36.61	305	9.08	1139	38.9	1555	52.07	856	26.56
BMK_Unigene_000213	219	3.79	129	2.28	89	1.84	139	2.89	120	2.9	144	3	521	9.36	370	7.64	2159	33.08	1465	25.88	1324	22.93	697	11.2
BMK_Unigene_000214	131	1.05	138	1.14	75	0.73	112	1.08	91	1.02	82	0.8	2975	24.85	2396	23.06	2141	15.23	2632	21.64	3204	25.84	3096	23.15
BMK_Unigene_000217	0	0	0	0	0	0	8	2.59	1	0.35	0	0	0	0	0	0	1	0.24	0	0	4	1.03	3	0.71
BMK_Unigene_000219	0	0	0	0	0	0	0	0	6	2.09	0	0	2	0.54	2	0.59	0	0	0	0	0	0	2	0.47
BMK_Unigene_000220	0	0	0	0	0	0	0	0	5	1.86	0	0	0	0	0	0	0	0	2	0.56	0	0	0	0
BMK_Unigene_000221	0	0	4	1.46	0	0	0	0	0	0	0	0	0	0	0	0	0	0	0	0	1	0.34	7	2.18
BMK_Unigene_000228	0	0	13	4.22	0	0	0	0	2	0.82	0	0	5	1.59	0	0	0	0	0	0	1	0.3	0	0
BMK_Unigene_000229	543	12.75	520	12.51	405	11.36	430	12.16	366	11.91	381	10.8	374	9.12	420	11.78	426	8.89	253	6.08	327	7.69	314	6.86
BMK_Unigene_000231	0	0	0	0	5	1.81	0	0	0	0	0	0	0	0	3	1.01	5	1.41	3	0.9	0	0	4	1.08
BMK_Unigene_000232	60	1.52	79	2.05	7	0.21	48	1.46	38	1.33	41	1.26	8	0.21	0	0	6	0.15	13	0.34	11	0.28	12	0.28
BMK_Unigene_000237	9	0.78	8	0.71	0	0	0	0	64	7.57	0	0	0	0	0	0	2	0.16	0	0	0	0	1	0.08
BMK_Unigene_000245	20	1.26	29	1.87	6	0.45	15	1.14	4	0.35	22	1.68	2	0.13	1	0.07	0	0	0	0	4	0.25	0	0
BMK_Unigene_000246	0	0	2	0.47	0	0	0	0	0	0	0	0	0	0	0	0	0	0	0	0	10	2.22	0	0
BMK_Unigene_000248	2035	35.62	1829	32.79	1294	27.06	1130	23.79	1479	35.95	1281	27.09	127	2.32	98	2.06	100	1.56	94	1.7	143	2.51	157	2.57
BMK_Unigene_000251	907	24.16	969	26.46	442	14.07	182	5.83	831	30.66	310	9.98	201	5.57	267	8.5	127	3	116	3.16	193	5.15	245	6.07
BMK_Unigene_000252	3528	33.73	2742	26.87	2543	29.08	3042	34.96	2381	31.69	2469	28.51	3602	35.85	3422	39.21	3445	29.2	6115	59.88	5296	50.87	6504	57.92
BMK_Unigene_000253	3	0.96	8	2.62	0	0	0	0	1	0.41	0	0	1	0.32	0	0	0	0	0	0	7	2.16	0	0
BMK_Unigene_000254	0	0	0	0	0	0	0	0	0	0	2	0.06	322	7.04	232	5.83	462	8.62	334	7.18	358	7.54	494	9.64
BMK_Unigene_000256	70	1.26	148	2.73	14	0.3	30	0.65	135	3.39	46	1	117	2.2	125	2.7	91	1.46	82	1.52	72	1.31	149	2.49
BMK_Unigene_000262	1541	51.48	1162	39.79	1256	50.11	1232	49.54	1066	49.28	1145	46.28	901	31.27	891	35.43	1313	39.01	1078	36.78	845	28.26	989	30.65
BMK_Unigene_000267	0	0	0	0	0	0	0	0	6	2.15	0	0	0	0	0	0	2	0.5	0	0	0	0	0	0
BMK_Unigene_000269	3	0.65	1	0.22	4	1.03	6	1.58	3	0.86	0	0	1	0.3	0	0	4	0.79	12	2.58	0	0	4	0.78
BMK_Unigene_000270	0	0	2	0.57	0	0	0	0	0	0	0	0	7	1.97	2	0.62	5	1.28	0	0	2	0.54	0	0
BMK_Unigene_000271	0	0	1	0.16	2	0.37	4	0.75	0	0	0	0	22	3.5	8	1.43	2	0.28	9	1.43	3	0.46	9	1.27
BMK_Unigene_000274	0	0	1	0.35	0	0	2	0.84	6	2.64	0	0	3	1.03	0	0	0	0	0	0	0	0	0	0
BMK_Unigene_000277	19	6.75	4	1.46	0	0	6	2.62	0	0	4	1.75	0	0	0	0	0	0	10	3.48	2	0.68	0	0
BMK_Unigene_000278	671	10.64	600	9.75	856	16.23	538	10.25	538	11.85	549	10.51	39	0.66	27	0.52	89	1.26	81	1.32	46	0.74	17	0.26
BMK_Unigene_000280	0	0	0	0	0	0	0	0	6	2.97	2	0.96	0	0	4	1.67	0	0	0	0	0	0	0	0
BMK_Unigene_000281	5	0.24	9	0.44	0	0	4	0.23	3	0.2	6	0.35	27	1.33	29	1.63	9	0.38	23	1.11	40	1.9	37	1.63
BMK_Unigene_000285	59	1.95	62	2.1	8	0.32	53	2.11	81	3.7	61	2.44	130	4.49	100	3.95	117	3.45	227	7.68	170	5.63	123	3.79
BMK_Unigene_000288	1464	28.52	773	15.43	1309	30.47	1547	36.24	863	23.33	1078	25.37	69	1.4	91	2.14	90	1.57	8	0.16	69	1.36	244	4.42
BMK_Unigene_000289	0	0	2	0.76	0	0	1	0.45	2	0.95	6	2.73	3	1.11	0	0	0	0	0	0	0	0	2	0.64
BMK_Unigene_000293	80	8.31	25	2.63	98	12.01	170	21.09	17	2.37	53	6.6	26	2.75	16	1.95	75	6.94	95	9.91	34	3.46	100	9.41
BMK_Unigene_000294	170	2.91	113	1.99	65	1.33	99	2.05	48	1.15	95	1.97	81	1.44	54	1.11	176	2.67	120	2.1	136	2.34	142	2.26
BMK_Unigene_000295	35	1.86	8	0.44	15	0.95	6	0.45	5	0.37	3	0.19	7	0.39	2	0.13	3	0.14	12	0.69	20	1.06	2	0.1
BMK_Unigene_000297	11	3.48	0	0	1	0.37	0	0	0	0	0	0	0	0	0	0	0	0	0	0	0	0	4	1.12
BMK_Unigene_000302	40	0.92	63	1.49	43	1.19	35	0.97	65	2.08	58	1.62	62	1.49	44	1.21	38	0.78	42	0.99	44	1.02	40	0.86
BMK_Unigene_000303	0	0	0	0	0	0	5	0.32	29	2.12	8	0.51	0	0	1	0.06	5	0.24	15	0.81	2	0.11	0	0
BMK_Unigene_000313	7	0.32	15	0.7	3	0.16	0	0	30	1.89	11	0.61	0	0	0	0	0	0	7	0.33	0	0	0	0
BMK_Unigene_000314	8	0.3	15	0.57	10	0.44	7	0.31	11	0.56	15	0.67	25	0.96	7	0.31	55	1.83	42	1.59	31	1.15	36	1.23
BMK_Unigene_000320	399	14.96	50	1.94	277	12.44	209	9.45	432	22.37	223	10.14	40	1.57	100	4.46	205	6.85	88	3.38	94	3.56	126	4.41
BMK_Unigene_000332	3	0.08	15	0.43	0	0	7	0.24	3	0.12	0	0	271	7.88	110	3.67	70	1.75	222	6.36	319	8.94	31	0.82
BMK_Unigene_000333	17	0.82	32	1.57	9	0.52	11	0.64	38	2.51	2	0.12	0	0	0	0	2	0.09	0	0	0	0	0	0
BMK_Unigene_000336	62	1.23	52	1.05	27	0.65	64	1.52	89	2.43	33	0.79	185	3.79	215	5.06	473	8.26	223	4.5	289	5.7	407	7.45
BMK_Unigene_000342	744	17.1	673	15.84	466	12.79	715	19.76	323	10.29	562	15.6	592	14.13	432	11.84	800	16.32	792	18.62	703	16.19	626	13.36
BMK_Unigene_000343	20	0.86	13	0.57	1	0.05	15	0.76	7	0.41	1	0.05	236	10.28	404	20.15	26	0.98	198	8.49	245	10.29	360	14.03
BMK_Unigene_000344	0	0	0	0	10	3.02	0	0	0	0	0	0	0	0	0	0	0	0	3	0.76	0	0	0	0
BMK_Unigene_000348	16	2.82	13	2.35	10	2.09	4	0.86	10	2.35	0	0	7	1.26	0	0	5	0.8	7	1.23	4	0.69	0	0
BMK_Unigene_000349	2	0.75	0	0	0	0	0	0	0	0	0	0	0	0	0	0	7	2.42	1	0.36	0	0	3	0.98
BMK_Unigene_000351	0	0	0	0	0	0	5	0.6	0	0	0	0	7	0.71	18	2.08	17	1.51	4	0.4	23	2.26	2	0.18
BMK_Unigene_000352	0	0	0	0	0	0	0	0	4	2.04	0	0	0	0	0	0	5	1.86	0	0	0	0	0	0
BMK_Unigene_000355	21	1.24	10	0.61	15	1.06	7	0.5	36	2.92	25	1.79	0	0	0	0	0	0	21	1.26	1	0.06	0	0
BMK_Unigene_000359	44	0.67	30	0.46	17	0.32	18	0.33	31	0.65	26	0.47	117	1.86	118	2.15	266	3.57	241	3.74	306	4.65	199	2.81
BMK_Unigene_000360	1079	12.31	1038	12.14	735	10.02	889	12.2	741	11.76	898	12.37	469	5.56	320	4.37	469	4.75	455	5.32	472	5.41	465	4.94
BMK_Unigene_000365	126	2.83	188	4.32	72	1.94	50	1.37	176	5.48	64	1.74	437	10.19	319	8.56	210	4.2	337	7.74	407	9.17	403	8.41
BMK_Unigene_000367	0	0	0	0	0	0	2	0.68	10	3.62	0	0	0	0	0	0	0	0	0	0	2	0.54	2	0.49
BMK_Unigene_000371	12	3.96	6	2.03	1	0.39	0	0	10	4.27	3	1.22	1	0.33	0	0	0	0	0	0	0	0	0	0
BMK_Unigene_000375	5	0.68	6	0.84	0	0	1	0.16	3	0.55	0	0	5	0.7	18	2.82	3	0.37	0	0	0	0	0	0
BMK_Unigene_000377	0	0	1	0.38	0	0	0	0	5	2.38	0	0	0	0	4	1.61	1	0.34	0	0	0	0	0	0
BMK_Unigene_000378	1	0.11	4	0.46	3	0.4	0	0	1	0.15	2	0.28	2	0.23	11	1.45	10	1.02	17	1.95	12	1.35	13	1.35
BMK_Unigene_000381	3	0.7	0	0	0	0	1	0.28	12	3.68	0	0	0	0	0	0	0	0	5	1.15	0	0	0	0
BMK_Unigene_000383	0	0	8	0.16	13	0.31	9	0.21	17	0.47	10	0.24	85	1.75	41	0.97	193	3.42	77	1.58	54	1.07	67	1.24
BMK_Unigene_000384	0	0	9	0.31	0	0	7	0.29	10	0.47	1	0.04	66	2.33	48	1.94	145	4.38	195	6.76	129	4.38	185	5.82
BMK_Unigene_000385	3	1.19	0	0	0	0	0	0	0	0	0	0	0	0	0	0	6	2.22	0	0	0	0	0	0
BMK_Unigene_000386	178	3.18	286	5.24	125	2.67	297	6.37	152	3.77	185	4.01	895	16.6	765	16.31	2966	46.94	1431	26.11	1393	24.93	1173	19.46
BMK_Unigene_000389	23	0.46	32	0.66	3	0.07	13	0.31	37	1.06	7	0.17	130	2.72	84	2.01	39	0.71	86	1.78	106	2.14	115	2.16
BMK_Unigene_000391	0	0	0	0	0	0	0	0	0	0	2	0.57	10	2.36	0	0	0	0	8	1.85	17	3.85	5	1.04
BMK_Unigene_000394	11	0.66	0	0	1	0.07	4	0.29	0	0	0	0	47	2.92	38	2.7	60	3.22	164	10.03	3	0.18	69	3.83
BMK_Unigene_000395	373	16.33	387	17.37	185	9.67	62	3.31	446	26.93	135	7.17	40	1.84	105	5.45	47	1.85	18	0.84	59	2.61	79	3.24
BMK_Unigene_000402	3	0.2	0	0	0	0	1	0.08	0	0	0	0	8	0.55	13	1.02	19	1.13	36	2.43	7	0.46	18	1.1
BMK_Unigene_000403	791	12.57	1081	17.6	342	6.51	321	6.13	947	20.92	582	11.18	121	2.01	111	2.12	99	1.4	104	1.71	109	1.75	131	1.94
BMK_Unigene_000407	1527	16.84	1226	13.85	1053	13.89	1382	18.32	933	14.31	1185	15.78	138	1.59	55	0.73	212	2.08	132	1.49	44	0.5	61	0.63
BMK_Unigene_000408	1	0.24	2	0.49	0	0	0	0	0	0	0	0	8	1.94	2	0.54	0	0	3	0.71	9	2.09	0	0
BMK_Unigene_000409	5	1.3	0	0	6	1.85	0	0	3	1.03	0	0	1	0.26	4	1.16	7	1.67	1	0.26	2	0.51	5	1.16
BMK_Unigene_000411	43	4.65	0	0	4	0.51	16	2.07	7	1.02	9	1.17	0	0	0	0	8	0.77	4	0.43	5	0.53	3	0.29
BMK_Unigene_000413	3551	52.13	2904	43.69	3293	57.8	4331	76.44	1848	37.7	3048	54.05	923	14.09	766	13.46	1162	15.13	1235	18.56	1239	18.26	1125	15.38
BMK_Unigene_000414	0	0	0	0	0	0	3	0.83	0	0	0	0	0	0	0	0	17	3.73	0	0	6	1.33	0	0
BMK_Unigene_000415	102	1.72	83	1.43	32	0.64	25	0.52	112	2.62	42	0.85	122	2.13	116	2.33	73	1.09	77	1.34	75	1.28	60	0.95
BMK_Unigene_000420	166	2.2	243	3.28	107	1.7	99	1.57	127	2.33	131	2.1	259	3.56	188	2.98	245	2.87	91	1.24	241	3.19	174	2.13
BMK_Unigene_000421	495	7.69	345	5.5	344	6.38	278	5.2	263	5.68	251	4.71	712	11.5	711	13.21	540	7.44	974	15.47	1105	17.21	979	14.14
BMK_Unigene_000424	256	86.41	397	137.68	239	95.61	177	73.58	174	75.87	211	88.11	35	12.04	60	22.12	36	11.26	44	14.56	47	15.25	36	10.69
BMK_Unigene_000428	3	0.63	0	0	0	0	0	0	0	0	0	0	0	0	0	0	0	0	8	1.89	0	0	0	0
BMK_Unigene_000429	0	0	0	0	0	0	0	0	3	0.45	0	0	0	0	0	0	25	2.52	0	0	2	0.22	0	0
BMK_Unigene_000431	0	0	0	0	5	0.11	0	0	1	0.03	0	0	68	1.3	94	2.06	11	0.18	0	0	62	1.14	96	1.65
BMK_Unigene_000438	1421	27.92	896	18.04	1041	24.44	1086	25.66	752	20.52	1246	29.58	916	18.71	776	18.21	2552	44.49	1969	39.56	1932	38.06	1287	23.5
BMK_Unigene_000443	0	0	0	0	0	0	15	0.63	4	0.19	0	0	0	0	0	0	8	0.25	13	0.46	0	0	60	1.97
BMK_Unigene_000444	199	3.73	221	4.26	111	2.49	100	2.26	174	4.53	136	3.08	364	7.1	420	9.41	305	5.08	343	6.58	428	8.05	382	6.66
BMK_Unigene_000445	0	0	0	0	2	0.77	0	0	9	3.8	0	0	0	0	0	0	2	0.6	0	0	0	0	0	0
BMK_Unigene_000448	0	0	20	2.03	0	0	0	0	2	0.27	0	0	6	0.61	0	0	1	0.09	0	0	0	0	2	0.18
BMK_Unigene_000449	2	0.34	0	0	0	0	5	1.02	4	0.9	0	0	27	4.63	0	0	0	0	0	0	4	0.66	1	0.15
BMK_Unigene_000450	0	0	0	0	0	0	0	0	3	0.68	0	0	1	0.17	0	0	6	0.92	0	0	12	2	3	0.46
BMK_Unigene_000452	1617	34.17	1708	36.98	1118	28.23	1415	35.97	1873	54.91	1389	35.46	364	7.99	178	4.51	366	6.87	588	12.7	432	9.17	321	6.31
BMK_Unigene_000453	0	0	0	0	0	0	0	0	5	1.39	0	0	0	0	0	0	5	0.96	4	0.84	3	0.62	10	1.89
BMK_Unigene_000455	210	4.78	363	8.47	121	3.3	94	2.57	368	11.62	159	4.38	19	0.47	17	0.46	0	0	9	0.21	0	0	22	0.47
BMK_Unigene_000456	9	3.11	7	2.48	1	0.41	0	0	1	0.45	1	0.43	0	0	3	1.13	0	0	0	0	4	1.33	0	0
BMK_Unigene_000460	594	12.66	751	16.39	181	4.62	186	4.78	1300	38.42	249	6.41	103	2.29	63	1.61	154	2.91	77	1.68	67	1.44	38	0.77
BMK_Unigene_000465	0	0	2	0.82	0	0	0	0	0	0	0	0	0	0	0	0	5	1.86	0	0	0	0	0	0
BMK_Unigene_000467	0	0	7	2.32	0	0	0	0	0	0	6	2.39	0	0	0	0	3	0.89	0	0	0	0	0	0
BMK_Unigene_000468	83	1.5	100	1.85	61	1.31	55	1.2	63	1.59	58	1.26	12	0.23	23	0.5	13	0.21	46	0.86	39	0.71	32	0.54
BMK_Unigene_000472	1769	33.33	2269	43.81	1283	28.89	1417	32.11	1089	28.5	1838	41.86	352	6.9	143	3.24	416	6.96	459	8.85	490	9.28	207	3.64
BMK_Unigene_000474	716	18.69	654	17.5	224	6.99	96	3.02	990	35.81	136	4.32	135	3.67	88	2.76	90	2.09	64	1.72	98	2.59	130	3.16
BMK_Unigene_000475	738	41.6	491	28.37	387	26.04	380	25.84	465	36.02	517	35.29	775	45.27	286	19.1	479	24.1	972	55.75	981	55.23	408	21.24
BMK_Unigene_000478	4	0.5	2	0.26	10	1.5	6	0.92	14	2.38	5	0.77	1	0.13	0	0	0	0	1	0.13	1	0.12	4	0.46
BMK_Unigene_000479	18	2.49	0	0	0	0	0	0	0	0	0	0	4	0.57	2	0.32	0	0	0	0	1	0.14	4	0.5
BMK_Unigene_000480	130	8.22	301	19.44	99	7.47	96	7.3	85	7.36	187	14.28	930	60.7	598	44.51	443	24.98	317	20.34	487	30.6	784	45.56
BMK_Unigene_000481	1695	22.54	1421	19.37	1047	16.65	1356	21.68	898	16.61	1064	17.09	1014	14.03	764	12.16	1768	20.85	1020	13.89	1249	16.67	1247	15.43
BMK_Unigene_000482	0	0	4	0.07	37	0.75	8	0.16	0	0	2	0.04	89	1.57	40	0.81	86	1.29	79	1.37	198	3.37	276	4.35
BMK_Unigene_000484	0	0	0	0	0	0	2	0.51	0	0	0	0	7	1.5	0	0	4	0.77	10	2.1	10	2.06	8	1.51
BMK_Unigene_000489	0	0	0	0	0	0	0	0	0	0	3	1.91	0	0	0	0	0	0	4	1.57	0	0	0	0
BMK_Unigene_000492	0	0	0	0	2	0.34	0	0	0	0	0	0	0	0	3	0.5	1	0.13	3	0.43	0	0	15	1.96
BMK_Unigene_000493	0	0	0	0	0	0	4	0.74	0	0	0	0	8	1.25	0	0	18	2.48	10	1.53	9	1.35	6	0.83
BMK_Unigene_000495	153	9.99	89	5.97	57	4.48	100	7.91	51	4.6	132	10.42	176	11.84	169	12.98	173	10.07	300	19.87	177	11.53	230	13.83
BMK_Unigene_000499	14	0.98	1	0.07	0	0	0	0	0	0	0	0	24	1.77	12	0.98	87	5.48	15	1.13	50	3.47	4	0.26
BMK_Unigene_000502	118	2.71	164	3.85	72	1.96	78	2.16	104	3.31	93	2.56	102	2.42	64	1.74	53	1.09	41	0.96	68	1.57	75	1.61
BMK_Unigene_000509	188	2.62	286	4.09	145	2.42	114	1.91	253	4.9	117	1.97	354	5.13	208	3.47	178	2.2	288	4.11	396	5.54	236	3.07
BMK_Unigene_000511	341	7.78	74	1.73	47	1.3	22	0.6	73	2.3	39	1.07	29	0.69	15	0.41	14	0.28	83	1.93	27	0.62	22	0.47
BMK_Unigene_000512	8	2.31	16	4.74	0	0	0	0	7	2.64	0	0	0	0	3	0.96	0	0	0	0	0	0	0	0
BMK_Unigene_000513	0	0	5	1.04	0	0	16	3.94	2	0.54	0	0	0	0	2	0.46	2	0.37	3	0.6	0	0	0	0
BMK_Unigene_000516	227	2.89	814	10.57	41	0.62	35	0.54	247	4.35	222	3.4	1151	15.18	599	9.09	669	7.52	145	1.89	723	9.2	642	7.58
BMK_Unigene_000522	6	0.15	22	0.58	0	0	4	0.12	0	0	0	0	159	4.13	77	2.3	27	0.61	90	2.3	110	2.77	38	0.9
BMK_Unigene_000523	0	0	0	0	0	0	0	0	0	0	8	2.22	0	0	0	0	9	1.86	0	0	0	0	0	0
BMK_Unigene_000524	1	0.07	30	2.29	1	0.09	2	0.18	2	0.2	0	0	3	0.28	8	0.73	10	0.65	3	0.22	10	0.73	10	0.73
BMK_Unigene_000525	27	2.47	26	2.44	12	1.31	2	0.22	19	2.37	10	1.11	51	4.84	26	2.88	18	1.48	22	2.04	18	1.64	27	2.27
BMK_Unigene_000526	0	0	0	0	0	0	0	0	1	0.24	5	1.08	3	0.54	14	2.82	9	1.44	1	0.18	7	1.21	1	0.16
BMK_Unigene_000527	0	0	3	0.82	0	0	0	0	3	1.05	8	2.62	4	1.08	1	0.3	0	0	7	1.85	0	0	0	0
BMK_Unigene_000530	43	2.49	43	2.55	47	3.25	33	2.31	27	2.15	49	3.44	8	0.48	11	0.75	32	1.66	43	2.53	33	1.91	18	0.96
BMK_Unigene_000534	6	1.04	17	3.03	4	0.82	10	2.11	0	0	3	0.66	5	0.89	10	1.98	9	1.42	17	2.95	5	0.85	0	0
BMK_Unigene_000536	2	0.22	0	0	0	0	0	0	0	0	0	0	18	2.05	0	0	0	0	1	0.11	3	0.33	5	0.51
BMK_Unigene_000540	4	0.16	26	1.05	2	0.09	6	0.28	0	0	10	0.48	195	7.95	50	2.33	1	0.03	4	0.16	11	0.43	5	0.18
BMK_Unigene_000541	7	1.59	2	0.47	0	0	0	0	9	2.7	0	0	0	0	0	0	2	0.41	1	0.23	0	0	0	0
BMK_Unigene_000543	15	5.52	4	1.51	15	6.52	16	7.23	7	3.31	4	1.82	0	0	0	0	0	0	0	0	0	0	3	0.97
BMK_Unigene_000545	28	3.54	0	0	0	0	0	0	0	0	0	0	0	0	0	0	0	0	0	0	0	0	0	0
BMK_Unigene_000550	1	0.09	2	0.19	0	0	4	0.45	0	0	0	0	11	1.05	30	3.25	5	0.42	13	1.22	0	0	4	0.34
BMK_Unigene_000552	14	3.25	24	5.72	4	1.1	13	3.68	22	6.74	7	1.99	23	5.43	27	7.05	2	0.42	1	0.23	6	1.36	13	2.7
BMK_Unigene_000558	95	5.68	90	5.51	44	3.14	38	2.74	49	4.02	44	3.19	10	0.62	9	0.64	10	0.53	11	0.67	18	1.07	15	0.83
BMK_Unigene_000559	8667	65.71	10525	81.77	5131	46.53	7965	72.58	12379	130.7	8612	78.84	8197	64.69	9810	89.17	12875	86.49	5993	46.55	6385	48.65	12710	89.79
BMK_Unigene_000562	15	0.74	22	1.11	20	1.18	11	0.66	35	2.38	9	0.54	35	1.79	31	1.81	17	0.75	27	1.36	21	1.04	15	0.69
BMK_Unigene_000563	0	0	2	0.18	2	0.21	0	0	1	0.12	2	0.21	6	0.54	26	2.67	1	0.08	5	0.44	0	0	2	0.16
BMK_Unigene_000564	1728	29.57	1281	22.48	1291	26.41	1303	26.83	1172	27.87	1164	24.08	2567	45.69	1760	36	4430	67.27	3210	56.2	3392	58.25	2997	47.7
BMK_Unigene_000570	0	0	0	0	5	1.92	0	0	1	0.42	0	0	0	0	8	2.85	0	0	0	0	8	2.5	0	0
BMK_Unigene_000573	0	0	0	0	1	0.25	9	2.29	1	0.28	0	0	5	1.07	8	1.89	5	0.95	7	1.46	4	0.82	20	3.76
BMK_Unigene_000574	10	0.95	11	1.07	3	0.34	3	0.34	15	1.94	4	0.46	0	0	0	0	12	1.02	1	0.1	0	0	7	0.61
BMK_Unigene_000575	0	0	0	0	0	0	0	0	3	0.6	1	0.18	1	0.15	0	0	8	1.08	13	1.95	0	0	0	0
BMK_Unigene_000576	0	0	0	0	0	0	0	0	2	0.98	0	0	0	0	0	0	4	1.42	6	2.24	0	0	0	0
BMK_Unigene_000577	0	0	0	0	10	3.12	0	0	0	0	0	0	0	0	0	0	0	0	3	0.78	0	0	0	0
BMK_Unigene_000578	6	0.16	8	0.22	2	0.06	16	0.51	8	0.3	2	0.06	274	7.59	186	5.91	1	0.02	16	0.44	53	1.42	7	0.17
BMK_Unigene_000579	6	2.02	1	0.35	4	1.59	0	0	0	0	0	0	0	0	0	0	2	0.62	2	0.66	0	0	0	0
BMK_Unigene_000584	17	0.99	10	0.59	3	0.21	0	0	41	3.27	8	0.56	1	0.06	1	0.07	0	0	4	0.24	1	0.06	0	0
BMK_Unigene_000587	1638	65.16	1113	45.36	1464	69.53	1158	55.49	1097	60.23	1534	73.84	1494	61.66	1011	47.74	1298	45.99	1175	47.65	1634	65.01	1320	48.62
BMK_Unigene_000588	1	0.3	0	0	0	0	0	0	5	1.94	0	0	0	0	0	0	0	0	3	0.88	0	0	7	1.84
BMK_Unigene_000595	0	0	0	0	1	0.26	3	0.79	0	0	0	0	3	0.66	0	0	4	0.79	5	1.08	5	1.06	16	3.1
BMK_Unigene_000599	0	0	0	0	0	0	0	0	4	1.15	0	0	0	0	3	0.73	3	0.59	0	0	4	0.84	11	2.13
BMK_Unigene_000601	81	2.33	74	2.18	55	1.86	65	2.22	132	5.19	63	2.16	11	0.33	5	0.17	13	0.33	36	1.05	5	0.15	35	0.94
BMK_Unigene_000603	377	6.47	207	3.64	242	4.98	185	3.82	121	2.9	150	3.11	903	16.11	717	14.71	822	12.52	574	10.07	723	12.44	750	11.98
BMK_Unigene_000606	6	0.19	8	0.26	1	0.04	4	0.15	0	0	0	0	445	13.22	268	9.12	589	14.98	506	14.77	490	14.02	399	10.6
BMK_Unigene_000610	9	0.3	1	0.04	0	0	2	0.08	3	0.14	0	0	50	1.67	35	1.35	110	3.15	97	3.19	90	2.92	86	2.57
BMK_Unigene_000611	7	0.59	0	0	5	0.55	19	1.93	0	0	6	0.61	0	0	0	0	8	0.6	2	0.17	1	0.08	0	0
BMK_Unigene_000612	1977	90.43	4272	200.25	378	20.65	354	19.54	7037	443.65	664	36.77	9099	431.5	10891	590.5	2704	110.22	3665	170.81	3401	155.53	11029	466.7
BMK_Unigene_000614	89	1.66	35	0.67	51	1.14	38	0.85	39	1.02	17	0.39	487	9.41	479	10.65	1057	17.43	856	16.26	773	14.41	1500	25.9
BMK_Unigene_000623	6	0.66	16	1.8	0	0	0	0	6	0.89	1	0.13	5	0.56	1	0.13	0	0	0	0	0	0	0	0
BMK_Unigene_000625	5	0.15	12	0.37	4	0.14	1	0.04	11	0.45	7	0.25	125	3.83	128	4.47	158	4.12	152	4.56	118	3.47	126	3.44
BMK_Unigene_000632	0	0	0	0	6	0.41	0	0	0	0	0	0	23	1.37	0	0	1	0.05	36	2.1	3	0.17	0	0
BMK_Unigene_000633	36	0.94	39	1.06	23	0.72	21	0.66	46	1.68	20	0.65	78	2.15	67	2.09	150	3.5	97	2.62	84	2.22	104	2.54
BMK_Unigene_000635	0	0	0	0	2	0.67	0	0	0	0	0	0	1	0.29	0	0	0	0	2	0.56	10	2.74	0	0
BMK_Unigene_000637	17	4.64	3	1.05	0	0	0	0	0	0	0	0	0	0	0	0	0	0	0	0	0	0	0	0
BMK_Unigene_000642	2	0.45	0	0	0	0	0	0	0	0	0	0	0	0	0	0	6	1.22	0	0	15	3.27	0	0
BMK_Unigene_000643	0	0	2	0.09	0	0	0	0	2	0.12	0	0	121	5.06	46	2.21	7	0.25	22	0.94	10	0.4	11	0.41
BMK_Unigene_000645	0	0	0	0	8	3.09	0	0	2	0.85	0	0	10	3.28	4	1.43	0	0	0	0	0	0	0	0
BMK_Unigene_000646	0	0	5	1.75	0	0	0	0	0	0	0	0	7	2.4	0	0	0	0	3	1	0	0	0	0
BMK_Unigene_000649	8	0.28	52	1.86	0	0	0	0	89	4.3	0	0	0	0	27	1.12	0	0	6	0.21	0	0	0	0
BMK_Unigene_000651	6	0.53	9	0.82	0	0	0	0	16	1.94	1	0.11	0	0	1	0.1	3	0.24	0	0	0	0	5	0.41
BMK_Unigene_000652	6	0.36	23	1.41	7	0.5	19	1.37	58	4.76	6	0.43	13	0.8	6	0.42	19	1.01	21	1.28	21	1.25	20	1.1
BMK_Unigene_000654	1784	50.73	1088	31.71	755	25.68	712	24.39	1059	41.74	475	16.33	625	18.46	923	31.3	450	11.37	69	2	915	26.07	1010	26.65
BMK_Unigene_000655	2	0.43	0	0	0	0	0	0	0	0	8	2.09	0	0	6	1.45	0	0	0	0	0	0	0	0
BMK_Unigene_000657	1	0.28	8	2.28	0	0	0	0	0	0	0	0	0	0	0	0	3	0.77	0	0	0	0	0	0
BMK_Unigene_000658	4	1.32	0	0	0	0	0	0	0	0	6	2.44	0	0	0	0	0	0	0	0	1	0.32	0	0
BMK_Unigene_000659	4	1.5	0	0	0	0	0	0	0	0	8	3.71	0	0	0	0	0	0	0	0	0	0	7	2.3
BMK_Unigene_000660	0	0	21	1.43	7	0.55	6	0.48	22	2	0	0	0	0	0	0	19	1.13	5	0.34	0	0	1	0.06
BMK_Unigene_000662	0	0	0	0	4	1.8	0	0	0	0	0	0	0	0	0	0	7	2.48	2	0.75	0	0	0	0
BMK_Unigene_000666	0	0	6	2.11	2	0.81	0	0	0	0	0	0	0	0	0	0	0	0	0	0	7	2.31	0	0
BMK_Unigene_000667	0	0	0	0	0	0	0	0	4	1.98	0	0	0	0	0	0	0	0	0	0	0	0	0	0
BMK_Unigene_000675	400	8.97	499	11.44	151	4.04	149	4.02	454	14.09	226	6.14	33	0.77	14	0.37	0	0	30	0.69	35	0.79	27	0.56
BMK_Unigene_000677	0	0	1	0.38	0	0	2	0.91	0	0	0	0	10	3.7	0	0	0	0	0	0	0	0	0	0
BMK_Unigene_000688	0	0	0	0	0	0	0	0	0	0	0	0	0	0	6	2.27	2	0.64	7	2.38	0	0	0	0
BMK_Unigene_000689	714	14.6	764	16.01	741	18.12	169	4.18	996	28.25	662	16.36	1224	26.01	632	15.43	607	11.03	1533	32.05	1789	36.68	946	17.98
BMK_Unigene_000690	0	0	0	0	0	0	0	0	2	0.91	0	0	1	0.35	0	0	1	0.33	11	3.78	2	0.67	14	4.32
BMK_Unigene_000691	714	10.18	260	3.8	868	14.8	1820	31.2	364	7.21	596	10.28	28	0.42	21	0.36	18	0.24	62	0.91	0	0	17	0.24
BMK_Unigene_000698	0	0	0	0	0	0	0	0	0	0	0	0	30	2.16	30	2.45	10	0.62	3	0.21	19	1.32	29	1.86
BMK_Unigene_000702	0	0	0	0	0	0	0	0	0	0	0	0	5	1.78	0	0	0	0	5	1.74	0	0	1	0.31
BMK_Unigene_000703	16	3.05	1	0.2	5	1.13	0	0	1	0.25	0	0	6	1.17	5	1.08	5	0.87	7	1.33	0	0	0	0
BMK_Unigene_000707	0	0	8	2.74	0	0	3	1.23	0	0	0	0	0	0	0	0	0	0	0	0	1	0.32	0	0
BMK_Unigene_000708	0	0	0	0	0	0	1	0.35	2	0.75	0	0	0	0	0	0	4	1.06	10	2.83	1	0.28	0	0
BMK_Unigene_000710	11	2.41	0	0	5	1.3	0	0	2	0.58	3	0.81	0	0	7	1.73	4	0.8	2	0.44	0	0	1	0.2
BMK_Unigene_000712	0	0	0	0	0	0	0	0	1	0.38	0	0	16	4.75	3	0.98	8	2.17	0	0	5	1.42	12	3.13
BMK_Unigene_000714	10	3.92	0	0	0	0	0	0	1	0.5	1	0.48	7	2.74	0	0	4	1.46	8	3.06	2	0.75	0	0
BMK_Unigene_000716	374	8.98	59	1.47	136	3.9	1720	49.69	36	1.2	243	7.08	12	0.3	17	0.49	43	0.92	36	0.88	19	0.46	34	0.76
BMK_Unigene_000717	0	0	0	0	0	0	6	2.85	0	0	0	0	0	0	0	0	0	0	3	1.13	2	0.74	0	0
BMK_Unigene_000721	8	2.54	3	0.98	3	1.13	0	0	1	0.41	0	0	0	0	2	0.7	10	2.93	0	0	6	1.84	8	2.24
BMK_Unigene_000725	1380	34.03	1120	28.3	945	27.86	752	22.33	800	27.34	803	23.93	1132	28.99	1006	29.6	855	18.73	835	21.06	1126	27.84	905	20.73
BMK_Unigene_000728	48	3.9	20	1.66	13	1.35	79	7.75	18	2	41	4.05	119	9.98	70	6.67	265	19.36	359	29.56	203	16.42	206	15.43
BMK_Unigene_000729	7	2.56	2	0.75	12	5.18	0	0	6	2.82	2	0.9	2	0.73	0	0	0	0	1	0.36	0	0	0	0
BMK_Unigene_000730	0	0	2	0.43	0	0	7	1.8	1	0.28	0	0	0	0	2	0.48	0	0	0	0	0	0	0	0
BMK_Unigene_000736	2	0.08	5	0.2	10	0.47	8	0.38	3	0.16	1	0.05	9	0.36	9	0.41	44	1.54	202	7.94	41	1.6	128	4.59
BMK_Unigene_000738	11	0.56	10	0.52	6	0.36	2	0.12	2	0.14	4	0.25	522	27.53	283	17.06	448	20.33	309	16.01	329	16.73	328	15.43
BMK_Unigene_000739	0	0	2	0.5	0	0	2	0.6	0	0	0	0	1	0.25	3	0.83	10	2.25	0	0	1	0.24	0	0
BMK_Unigene_000740	1298	28.56	1214	27.36	647	17.01	407	10.77	868	26.48	704	18.71	1477	33.76	919	24.13	1338	26.13	626	14.07	1353	29.86	1322	27.02
BMK_Unigene_000741	56	3	38	2.07	75	4.73	117	7.5	28	2.05	35	2.27	5	0.27	0	0	0	0	1	0.05	0	0	0	0
BMK_Unigene_000742	0	0	0	0	0	0	0	0	3	1.42	5	2.27	0	0	0	0	0	0	0	0	0	0	2	0.64
BMK_Unigene_000744	0	0	0	0	5	0.77	1	0.16	14	2.43	0	0	0	0	0	0	0	0	2	0.26	0	0	0	0
BMK_Unigene_000747	6	1.37	2	0.47	0	0	2	0.56	0	0	0	0	9	2.09	16	4.12	17	3.56	2	0.46	11	2.45	0	0
BMK_Unigene_000753	974	14.79	906	14.09	879	15.94	771	14.08	552	11.65	1262	23.14	1863	29.41	1140	20.71	3248	43.72	2947	45.76	2067	31.48	2559	36.13
BMK_Unigene_000755	0	0	0	0	0	0	1	0.07	0	0	3	0.2	8	0.46	13	0.84	30	1.47	42	2.35	19	1.04	8	0.41
BMK_Unigene_000757	0	0	0	0	0	0	24	4.27	0	0	0	0	0	0	0	0	0	0	0	0	1	0.14	0	0
BMK_Unigene_000760	0	0	1	0.24	0	0	0	0	7	2.18	0	0	0	0	0	0	0	0	0	0	0	0	5	1.06
BMK_Unigene_000762	4174	88.52	4362	94.8	2957	74.96	2333	59.53	3946	116.12	2380	61.02	774	17.07	1272	32.22	441	8.31	1154	25.03	548	11.67	1283	25.3
BMK_Unigene_000763	0	0	0	0	1	0.05	7	0.34	8	0.44	1	0.05	157	6.5	135	6.4	175	6.22	189	7.7	200	8	143	5.29
BMK_Unigene_000764	16	0.29	2	0.04	0	0	0	0	1	0.03	0	0	41	0.78	51	1.11	116	1.88	74	1.38	114	2.08	60	1.02
BMK_Unigene_000775	1935	15.79	2300	19.23	1527	14.9	1358	13.32	1532	17.4	1442	14.21	664	5.64	620	6.06	1018	7.36	766	6.4	961	7.88	1122	8.53
BMK_Unigene_000776	2	0.07	0	0	0	0	2	0.09	0	0	0	0	8	0.3	0	0	558	17.9	34	1.25	111	4.01	18	0.6
BMK_Unigene_000785	7	2.62	4	1.55	3	1.33	8	3.69	3	1.44	1	0.46	14	5.25	0	0	3	1.04	5	1.83	8	2.87	14	4.59
BMK_Unigene_000790	4	0.79	0	0	0	0	0	0	1	0.26	0	0	15	3.03	8	1.8	2	0.36	0	0	0	0	0	0
BMK_Unigene_000798	1587	13.38	1634	14.11	776	7.82	654	6.63	1195	14.03	755	7.68	1135	9.96	1073	10.84	980	7.32	869	7.5	1226	10.39	1518	11.92
BMK_Unigene_000799	10	2.61	1	0.27	0	0	0	0	2	0.68	0	0	0	0	8	2.33	0	0	0	0	0	0	0	0
BMK_Unigene_000806	0	0	0	0	0	0	13	2.54	1	0.22	0	0	3	0.5	0	0	0	0	3	0.49	0	0	5	0.73
BMK_Unigene_000811	12	2.1	16	2.87	0	0	0	0	12	2.8	3	0.64	4	0.71	15	2.99	5	0.79	1	0.17	0	0	2	0.32
BMK_Unigene_000814	0	0	0	0	0	0	7	2.96	0	0	1	0.43	0	0	0	0	0	0	3	1.01	0	0	1	0.3
BMK_Unigene_000818	32	3.24	16	1.66	10	1.2	0	0	13	1.79	5	0.61	0	0	0	0	0	0	0	0	0	0	0	0
BMK_Unigene_000819	1691	17.85	1104	11.94	1064	13.43	1114	14.13	854	12.54	1169	14.9	1182	12.98	1325	16.75	1646	15.4	1905	20.58	1905	20.2	1689	16.6
BMK_Unigene_000821	17	2.07	22	2.75	19	2.76	8	1.18	15	2.47	5	0.74	0	0	0	0	0	0	2	0.25	0	0	0	0
BMK_Unigene_000822	0	0	3	0.69	0	0	0	0	16	4.76	0	0	9	2.06	2	0.51	0	0	0	0	0	0	0	0
BMK_Unigene_000825	8	2.76	3	1.06	17	6.93	0	0	10	4.45	0	0	0	0	0	0	0	0	1	0.34	2	0.66	0	0
BMK_Unigene_000828	916	21.02	860	20.24	576	15.79	531	14.67	848	26.98	565	15.68	859	20.49	725	19.87	992	20.22	450	10.55	623	14.34	749	15.96
BMK_Unigene_000830	42	1.22	170	5.01	44	1.52	37	1.29	90	3.57	50	1.75	285	8.48	115	3.94	117	3	90	2.65	231	6.63	156	4.14
BMK_Unigene_000831	3	0.07	4	0.1	53	1.4	25	0.66	7	0.22	49	1.32	195	4.47	331	8.68	327	6.38	184	4.13	390	8.59	381	7.78
BMK_Unigene_000836	1276	43.71	1353	47.48	688	28.13	1746	71.97	902	42.71	1150	47.65	1616	57.46	1487	60.58	532	16.21	455	15.91	944	32.38	713	22.66
BMK_Unigene_000843	140	1.95	212	3.02	44	0.75	32	0.54	112	2.17	78	1.31	136	1.97	84	1.4	173	2.13	160	2.27	231	3.21	257	3.32
BMK_Unigene_000844	1161	12.46	1188	13.07	386	4.96	470	6.07	364	5.45	620	8.04	44	0.5	57	0.74	39	0.38	43	0.47	41	0.45	67	0.67
BMK_Unigene_000845	586	4.54	673	5.35	422	3.91	430	4	582	6.28	486	4.55	490	3.95	458	4.26	656	4.5	551	4.37	615	4.79	631	4.56
BMK_Unigene_000846	48	5.46	0	0	0	0	0	0	0	0	0	0	4	0.47	0	0	0	0	0	0	0	0	0	0
BMK_Unigene_000848	0	0	0	0	0	0	1	0.48	0	0	0	0	0	0	0	0	0	0	7	2.69	0	0	0	0
BMK_Unigene_000850	1715	35.54	1599	33.97	1340	33.21	1074	26.79	1664	47.86	1200	30.07	361	7.79	376	9.31	599	11.03	337	7.16	375	7.8	451	8.7
BMK_Unigene_000855	5	0.85	10	1.73	0	0	0	0	0	0	3	0.62	19	3.29	15	2.9	2	0.31	1	0.17	4	0.67	2	0.31
BMK_Unigene_000856	17	0.38	16	0.37	20	0.52	7	0.18	14	0.44	17	0.45	92	2.08	174	4.52	19	0.37	56	1.25	68	1.48	65	1.31
BMK_Unigene_000858	18	4.07	0	0	2	0.54	0	0	5	1.49	0	0	0	0	0	0	0	0	6	1.35	0	0	0	0
BMK_Unigene_000859	23	0.92	31	1.26	23	1.09	63	3.04	21	1.15	30	1.44	0	0	3	0.14	0	0	36	1.48	0	0	0	0
BMK_Unigene_000862	223	17.23	559	44.27	147	13.58	330	30.85	140	14.81	275	25.75	5170	412.48	1080	97.92	6214	429.54	1841	144.19	3773	289.92	3971	281.98
BMK_Unigene_000866	9	1.93	0	0	3	0.76	4	1.04	0	0	9	2.36	2	0.44	0	0	0	0	0	0	0	0	0	0
BMK_Unigene_000868	5	2.01	0	0	0	0	0	0	0	0	0	0	0	0	0	0	2	0.75	0	0	0	0	0	0
BMK_Unigene_000873	295	7.47	474	12.27	189	5.72	266	8.11	185	6.51	327	10.01	126	3.32	109	3.29	352	7.91	144	3.72	232	5.89	166	3.9
BMK_Unigene_000875	45	2.57	56	3.22	34	2.32	79	5.34	37	2.91	51	3.49	233	13.52	164	10.86	136	6.83	259	14.79	228	12.77	248	12.82
BMK_Unigene_000877	3	0.35	0	0	1	0.14	0	0	17	2.69	4	0.57	0	0	0	0	0	0	0	0	0	0	2	0.21
BMK_Unigene_000878	0	0	0	0	0	0	0	0	0	0	0	0	0	0	5	1.71	2	0.57	0	0	8	2.4	3	0.82
BMK_Unigene_000883	0	0	0	0	0	0	0	0	0	0	0	0	0	0	0	0	9	2.1	0	0	0	0	0	0
BMK_Unigene_000885	0	0	39	3.56	3	0.32	36	3.86	7	0.89	0	0	0	0	12	1.25	8	0.64	5	0.46	0	0	5	0.41
BMK_Unigene_000886	136	2.91	94	2.06	66	1.69	113	2.93	89	2.64	78	2.02	0	0	0	0	48	0.93	0	0	29	0.62	21	0.42
BMK_Unigene_000890	2	0.06	0	0	10	0.37	6	0.23	11	0.48	11	0.42	124	4.07	71	2.67	93	2.62	53	1.71	56	1.76	88	2.56
BMK_Unigene_000905	8	0.8	11	1.13	15	1.79	12	1.46	3	0.41	10	1.22	0	0	4	0.47	0	0	0	0	1	0.1	0	0
BMK_Unigene_000906	29	3.48	5	0.62	9	1.29	13	1.89	23	3.74	3	0.44	15	1.85	8	1.12	13	1.41	10	1.21	12	1.43	20	2.19
BMK_Unigene_000908	0	0	0	0	0	0	2	0.76	0	0	0	0	5	1.56	0	0	7	2	7	2.13	0	0	0	0
BMK_Unigene_000911	7	0.08	14	0.17	27	0.39	35	0.5	10	0.18	34	0.49	971	11.7	1330	18.46	2159	22.18	1904	22.59	1856	21.6	1560	16.83
BMK_Unigene_000915	0	0	3	0.9	0	0	0	0	0	0	0	0	0	0	9	2.9	0	0	0	0	6	1.69	0	0
BMK_Unigene_000916	0	0	0	0	3	0.14	1	0.05	7	0.37	3	0.17	4	0.2	1	0.05	54	1.87	21	0.84	25	0.97	45	1.63
BMK_Unigene_000917	19	0.47	25	0.63	51	1.5	76	2.26	15	0.51	48	1.43	2	0.05	5	0.15	15	0.33	6	0.15	3	0.07	12	0.28
BMK_Unigene_000919	11	2.55	2	0.47	0	0	7	1.97	13	3.97	2	0.57	0	0	0	0	2	0.42	0	0	0	0	0	0
BMK_Unigene_000925	0	0	0	0	0	0	9	2.03	1	0.25	0	0	2	0.38	0	0	2	0.34	0	0	2	0.36	2	0.33
BMK_Unigene_000926	2	0.25	16	2.06	10	1.49	11	1.67	7	1.19	5	0.76	0	0	0	0	0	0	0	0	0	0	0	0
BMK_Unigene_000928	0	0	2	0.65	0	0	0	0	0	0	0	0	0	0	2	0.69	8	2.32	0	0	0	0	0	0
BMK_Unigene_000933	1	0.12	7	0.83	0	0	0	0	13	2.16	4	0.56	9	1.07	1	0.13	3	0.31	1	0.12	3	0.34	11	1.19
BMK_Unigene_000935	72	1.45	71	1.47	18	0.43	99	2.4	20	0.56	56	1.36	8	0.17	19	0.46	43	0.77	26	0.54	13	0.26	106	1.99
BMK_Unigene_000939	2	0.18	4	0.45	2	0.21	3	0.36	0	0	3	0.38	188	17.24	84	8.8	580	46.19	113	10.18	122	10.77	115	9.44
BMK_Unigene_000942	480	173.88	1089	404.71	1223	521.97	1353	600.87	351	163.3	640	285.75	31	11.22	8	3.14	220	73.74	17	6.01	70	24.62	647	205.13
BMK_Unigene_000943	4	1.08	0	0	0	0	0	0	6	2.12	0	0	0	0	0	0	7	1.74	0	0	0	0	2	0.48
BMK_Unigene_000944	0	0	0	0	0	0	0	0	2	0.18	0	0	5	0.33	25	1.9	9	0.52	2	0.13	0	0	1	0.06
BMK_Unigene_000946	1395	13.58	1165	11.63	689	8.03	417	4.88	1271	17.23	469	5.52	169	1.72	125	1.46	85	0.74	98	0.98	127	1.24	131	1.19
BMK_Unigene_000948	0	0	5	1.93	1	0.44	0	0	0	0	0	0	0	0	0	0	0	0	4	1.46	0	0	0	0
BMK_Unigene_000952	2	0.6	2	0.62	3	1.07	0	0	4	1.56	0	0	6	1.82	0	0	4	1.11	0	0	0	0	0	0
BMK_Unigene_000961	3	0.11	2	0.07	4	0.14	0	0	0	0	3	0.11	70	2.15	44	1.58	65	1.71	15	0.48	11	0.35	29	0.8
BMK_Unigene_000964	0	0	4	1.5	0	0	0	0	0	0	0	0	0	0	0	0	0	0	0	0	6	2.11	0	0
BMK_Unigene_000966	3	0.5	0	0	0	0	4	0.81	0	0	0	0	3	0.51	5	0.95	12	1.81	0	0	5	0.82	3	0.45
BMK_Unigene_000968	1374	24.57	273	5.02	2730	58.39	1233	26.53	115	2.86	1349	29.16	36	0.67	33	0.71	76	1.22	71	1.31	227	4.09	28	0.47
BMK_Unigene_000969	4	0.07	13	0.24	0	0	8	0.19	5	0.14	0	0	850	15.31	448	9.29	546	8.4	699	12.39	1078	18.74	767	12.35
BMK_Unigene_000971	15	0.75	90	4.61	2	0.12	1	0.06	18	1.24	16	0.97	0	0	0	0	0	0	7	0.36	0	0	0	0
BMK_Unigene_000975	0	0	0	0	0	0	0	0	0	0	0	0	0	0	0	0	8	2.2	0	0	0	0	0	0
BMK_Unigene_000976	29	0.74	59	1.55	64	1.96	10	0.31	10	0.36	21	0.65	18	0.48	0	0	0	0	0	0	52	1.34	2	0.05
BMK_Unigene_000978	60	8.55	160	23.36	26	4.4	55	9.5	67	12.84	63	10.93	79	11.55	70	11.49	21	2.7	52	7.45	46	6.47	36	4.66
BMK_Unigene_000979	0	0	0	0	0	0	0	0	0	0	0	0	1	0.28	3	0.93	4	1.03	2	0.55	4	1.09	8	1.99
BMK_Unigene_000981	14	1.05	19	1.45	0	0	0	0	35	3.58	7	0.63	0	0	5	0.44	0	0	0	0	3	0.22	7	0.48
BMK_Unigene_000989	4	0.75	0	0	0	0	0	0	3	0.75	0	0	0	0	2	0.43	0	0	5	0.93	3	0.55	14	2.36
BMK_Unigene_000990	1	0.06	0	0	0	0	0	0	8	0.61	3	0.2	34	1.94	12	0.78	116	5.7	14	0.78	22	1.21	109	5.54
BMK_Unigene_000994	44	1.39	48	1.58	20	0.77	24	0.95	42	1.88	23	0.91	43	1.45	30	1.16	126	3.56	54	1.76	55	1.75	66	1.97
BMK_Unigene_000999	359	3.07	235	2.06	356	3.63	749	7.68	245	2.92	342	3.52	175	1.55	222	2.27	309	2.33	182	1.59	196	1.68	275	2.18
BMK_Unigene_001000	46	3.03	22	1.48	18	1.41	31	2.46	12	1.08	23	1.83	11	0.75	0	0	13	0.76	3	0.2	4	0.26	12	0.73
BMK_Unigene_001001	0	0	0	0	0	0	4	0.19	0	0	0	0	0	0	97	4.5	0	0	0	0	0	0	153	5.53
BMK_Unigene_001002	18	1.23	27	1.89	23	1.87	8	0.66	23	2.15	15	1.24	25	1.76	32	2.57	10	0.61	10	0.7	24	1.63	18	1.13
BMK_Unigene_001003	6	0.11	7	0.12	9	0.19	20	0.42	15	0.36	22	0.46	2646	47.29	2524	51.86	1104	16.84	995	17.5	1970	33.98	2482	39.67
BMK_Unigene_001008	3	0.4	0	0	0	0	0	0	0	0	0	0	0	0	0	0	0	0	16	2.16	0	0	0	0
BMK_Unigene_001009	1	0.22	1	0.23	0	0	0	0	12	3.57	0	0	0	0	0	0	1	0.2	0	0	0	0	0	0
BMK_Unigene_001013	149	2.52	119	2.07	101	2.03	110	2.24	148	3.46	112	2.29	47	0.83	84	1.7	45	0.69	55	0.95	48	0.81	92	1.45
BMK_Unigene_001014	4	0.7	1	0.18	1	0.21	1	0.21	14	3.27	14	2.98	0	0	2	0.4	5	0.79	7	1.22	0	0	0	0
BMK_Unigene_001015	178	5.77	198	6.61	112	4.34	21	0.82	157	7.05	78	3.06	84	2.83	164	6.33	80	2.31	44	1.46	75	2.44	123	3.72
BMK_Unigene_001018	25	0.73	7	0.21	7	0.25	2	0.07	49	2.03	0	0	5	0.15	2	0.07	3	0.08	4	0.12	0	0	4	0.11
BMK_Unigene_001024	0	0	3	0.6	0	0	3	0.71	1	0.26	0	0	10	1.99	2	0.44	4	0.71	0	0	3	0.57	5	0.88
BMK_Unigene_001027	2298	19.59	2529	22.09	994	10.14	1642	16.82	1368	16.23	1082	11.14	583	5.17	548	5.6	784	5.93	1085	9.48	451	3.87	339	2.69
BMK_Unigene_001029	9	0.18	3	0.07	0	0.02	6	0.15	5	0.14	1	0.03	210	4.48	186	4.56	127	2.31	174	3.65	198	4.07	289	5.5
BMK_Unigene_001031	113	3.99	197	7.08	112	4.71	93	3.93	131	6.38	84	3.56	379	13.76	461	19.21	115	3.61	146	5.21	126	4.45	256	8.3
BMK_Unigene_001033	0	0	0	0	0	0	0	0	5	1.83	0	0	0	0	0	0	0	0	6	1.66	0	0	0	0
BMK_Unigene_001039	0	0	0	0	0	0	1	0.26	0	0	4	1.03	0	0	0	0	0	0	9	1.89	1	0.21	1	0.19
BMK_Unigene_001044	434	6.42	655	9.92	217	3.84	303	5.38	266	5.48	152	2.71	177	2.72	106	1.89	144	1.89	195	2.96	224	3.32	145	2
BMK_Unigene_001045	8	2.22	0	0	0	0	4	1.36	0	0	3	1.02	0	0	0	0	0	0	0	0	5	1.35	5	1.23
BMK_Unigene_001050	520	9.27	363	6.64	127	2.71	162	3.49	496	12.28	143	3.08	73	1.36	81	1.73	44	0.71	40	0.75	26	0.47	70	1.17
BMK_Unigene_001054	6	0.69	0	0	0	0	0	0	13	2.03	0	0	1	0.12	0	0	0	0	0	0	1	0.11	0	0
BMK_Unigene_001055	848	12.33	1748	26.04	879	15.29	1345	23.51	930	18.8	3013	52.91	183	2.77	110	1.93	158	2.04	65	0.98	280	4.1	269	3.64
BMK_Unigene_001057	98	5.3	233	12.91	94	6.06	79	5.15	209	15.54	202	13.23	79	4.42	8	0.51	81	3.91	107	5.89	157	8.48	140	6.99
BMK_Unigene_001062	0	0	0	0	0	0	0	0	8	2.63	0	0	0	0	0	0	0	0	0	0	0	0	0	0
BMK_Unigene_001063	4	0.43	11	1.21	3	0.38	0	0	15	2.19	2	0.26	4	0.44	0	0	0	0	0	0	0	0	0	0
BMK_Unigene_001069	722	6.92	1952	19.17	784	8.99	785	9.05	3022	40.3	747	8.65	71	0.71	60	0.7	281	2.39	481	4.72	79	0.77	311	2.78
BMK_Unigene_001070	0	0	0	0	0	0	0	0	5	1.56	1	0.29	9	2.16	0	0	0	0	1	0.23	0	0	2	0.42
BMK_Unigene_001079	470	7.13	430	6.69	373	6.77	593	10.82	285	6.02	500	9.17	2887	45.55	1906	34.58	7923	106.58	5163	80.13	5245	79.85	3486	49.2
BMK_Unigene_001081	2035	31.75	1875	29.99	1643	30.65	1383	25.95	937	20.33	1764	33.26	443	7.19	255	4.77	584	8.08	470	7.51	563	8.83	466	6.77
BMK_Unigene_001086	2	0.75	8	3.08	0	0	0	0	1	0.48	1	0.46	1	0.37	0	0	1	0.35	0	0	0	0	0	0
BMK_Unigene_001088	209	4.23	425	8.78	88	2.13	89	2.17	218	6.1	130	3.19	32	0.68	63	1.52	105	1.89	31	0.64	81	1.65	74	1.4
BMK_Unigene_001089	7	0.21	9	0.28	11	0.4	2	0.07	10	0.45	5	0.19	7	0.25	10	0.36	45	1.25	130	4.07	50	1.56	18	0.51
BMK_Unigene_001091	0	0	0	0	5	0.55	26	2.9	0	0	3	0.34	0	0	0	0	1	0.08	2	0.19	0	0	9	0.76
BMK_Unigene_001092	2808	55.67	3043	61.82	2107	49.93	1715	40.91	1663	45.76	2161	51.78	1190	24.53	643	15.23	896	15.77	529	10.73	1355	26.95	747	13.78
BMK_Unigene_001093	202	5.8	229	6.74	37	1.3	84	2.9	59	2.35	103	3.59	29	0.86	46	1.57	32	0.82	33	0.97	8	0.23	86	2.29
BMK_Unigene_001094	0	0	0	0	0	0	0	0	0	0	0	0	0	0	10	0.92	0	0	28	2.23	0	0	2	0.14
BMK_Unigene_001096	266	4.96	320	6.11	155	3.46	135	3.02	229	5.93	207	4.66	301	5.83	315	7	222	3.68	180	3.43	320	5.98	206	3.57
BMK_Unigene_001098	24	0.37	30	0.47	14	0.26	37	0.68	27	0.58	23	0.43	22	0.35	16	0.29	93	1.27	76	1.19	56	0.86	139	1.98
BMK_Unigene_001099	285	79.63	34	9.79	11	3.63	31	10.58	18	6.57	31	10.64	8	2.31	2	0.62	4	1.03	4	1.1	1	0.27	13	3.22
BMK_Unigene_001100	3	0.56	0	0	0	0	0	0	4	0.99	0	0	0	0	0	0	3	0.51	2	0.37	10	1.82	10	1.67
BMK_Unigene_001101	1091	13.55	842	10.71	948	14.07	815	12.17	592	10.23	934	14	1993	25.73	2039	30.29	2773	30.51	1674	21.26	1883	23.47	2278	26.32
BMK_Unigene_001103	6	1.15	0	0	0	0	5	1.17	0	0	2	0.47	0	0	0	0	7	1.23	7	1.34	0	0	11	1.9
BMK_Unigene_001104	0	0	6	1.97	0	0	0	0	0	0	0	0	1	0.32	0	0	0	0	0	0	0	0	0	0
BMK_Unigene_001107	70	1.68	27	0.66	24	0.69	25	0.72	47	1.56	26	0.75	530	13.22	681	19.53	53	1.14	366	8.98	281	6.76	305	6.8
BMK_Unigene_001108	2	0.13	4	0.26	5	0.38	8	0.61	4	0.35	0	0	98	6.44	3	0.22	10	0.57	45	2.9	50	3.17	1	0.06
BMK_Unigene_001115	3226	42.79	1732	23.55	1034	16.4	1765	28.15	1049	19.34	1440	23.07	2003	27.63	1655	26.27	3484	40.98	2691	36.52	2988	39.79	2693	33.24
BMK_Unigene_001117	0	0	2	0.64	0	0	0	0	0	0	4	1.54	9	2.83	0	0	0	0	0	0	0	0	0	0
BMK_Unigene_001122	106	3.38	161	5.28	87	3.34	23	0.89	85	3.77	109	4.21	938	31.08	787	29.92	1282	36.4	744	24.24	913	29.18	1262	37.34
BMK_Unigene_001126	27	8.72	26	8.62	15	5.72	0	0	27	11.3	20	7.96	13	4.23	16	5.67	11	3.28	16	5.07	22	6.85	10	2.85
BMK_Unigene_001129	158	5.17	307	10.29	20	0.78	16	0.63	167	7.56	58	2.29	302	10.26	152	5.92	98	2.85	42	1.4	83	2.72	40	1.21
BMK_Unigene_001136	185	3.66	300	6.06	92	2.17	2	0.07	162	4.45	117	2.8	25	0.52	31	0.75	10	0.19	14	0.3	25	0.5	25	0.46
BMK_Unigene_001139	0	0	6	0.13	4	0.1	8	0.2	0	0	8	0.2	64	1.41	47	1.19	93	1.74	89	1.94	88	1.86	64	1.26
BMK_Unigene_001140	6	0.14	14	0.32	4	0.11	0	0	33	1.03	12	0.33	95	2.22	5	0.13	23	0.46	16	0.37	18	0.41	50	1.05
BMK_Unigene_001144	1021	24.05	895	21.61	856	24.1	1587	44.95	316	10.34	1291	36.75	1499	36.68	1255	35.26	2835	59.28	3294	79.28	2785	65.75	2368	51.79
BMK_Unigene_001147	1	0.04	21	0.93	32	1.65	21	1.1	57	3.46	32	1.7	16	0.72	9	0.51	0	0	9	0.4	2	0.09	3	0.13
BMK_Unigene_001149	5	0.32	0	0	0	0	1	0.08	0	0	0	0	5	0.33	21	1.57	110	6.22	23	1.48	2	0.13	19	1.11
BMK_Unigene_001152	2	0.5	10	2.59	2	0.6	0	0	1	0.33	0	0	0	0	0	0	4	0.92	0	0	0	0	0	0
BMK_Unigene_001153	8	3.09	1	0.4	2	0.91	2	0.95	7	3.47	3	1.43	0	0	0	0	0	0	2	0.75	0	0	0	0
BMK_Unigene_001158	5	1.41	7	2.03	0	0	6	2.07	0	0	0	0	0	0	0	0	0	0	0	0	0	0	0	0
BMK_Unigene_001163	638	22.87	615	22.61	524	22.46	497	21.49	471	23.34	581	25.19	219	8.16	173	7.37	168	5.39	244	8.94	195	7.01	213	7.09
BMK_Unigene_001164	5	0.12	4	0.1	0	0	0	0	8	0.26	0	0	392	9.68	2016	57.16	6	0.13	378	9.18	220	5.25	119	2.63
BMK_Unigene_001165	2	0.53	0	0	0	0	0	0	0	0	0	0	0	0	0	0	0	0	9	2.36	0	0	1	0.24
BMK_Unigene_001171	812	30.49	509	19.61	546	24.47	176	7.96	638	33.09	383	17.4	2150	83.76	1486	66.32	2084	69.65	415	15.89	1100	41.35	1259	43.81
BMK_Unigene_001173	79	1.48	73	1.41	96	2.15	46	1.04	79	2.08	42	0.95	910	17.75	1069	23.97	602	10.04	470	9.02	631	11.88	501	8.74
BMK_Unigene_001179	1	0.05	12	0.7	8	0.5	1	0.13	1	0.14	4	0.26	16	0.87	56	3.48	9	0.42	56	3.02	15	0.79	23	1.12
BMK_Unigene_001182	59	2.4	68	2.83	39	1.88	67	3.26	48	2.68	43	2.1	26	1.09	71	3.43	91	3.27	80	3.3	68	2.79	66	2.47
BMK_Unigene_001187	0	0	4	1.07	2	0.62	0	0	0	0	0	0	0	0	0	0	1	0.24	10	2.58	0	0	2	0.46
BMK_Unigene_001188	71	0.57	68	0.56	26	0.25	155	1.49	84	0.94	14	0.14	233	1.93	292	2.79	782	5.53	819	6.69	149	1.2	685	5.09
BMK_Unigene_001192	0	0	1	0.25	5	1.44	0	0	7	2.24	0	0	4	0.99	0	0	0	0	0	0	15	3.55	0	0
BMK_Unigene_001199	216	7.98	136	5.13	174	7.65	56	2.5	197	10.05	98	4.36	107	4.09	62	2.76	34	1.11	96	3.61	93	3.46	156	5.32
BMK_Unigene_001201	941	33.39	668	24.27	925	39.21	2242	95.76	573	28.09	754	32.36	273	10.08	251	10.6	314	9.94	486	17.61	342	12.14	321	10.55
BMK_Unigene_001202	10	1.86	0	0	0	0	0	0	5	1.24	1	0.23	0	0	2	0.42	2	0.34	4	0.74	3	0.55	1	0.17
BMK_Unigene_001203	193	5.53	129	3.81	124	4.24	214	7.37	159	6.34	129	4.48	385	11.44	392	13.38	334	8.5	480	14.03	372	10.69	395	10.52
BMK_Unigene_001204	0	0	0	0	0	0	1	0.47	7	3.41	0	0	6	2.28	2	0.82	1	0.35	0	0	3	1.09	1	0.33
BMK_Unigene_001206	0	0	0	0	0	0	0	0	0	0	0	0	0	0	0	0	0	0	0	0	0	0	8	1.99
BMK_Unigene_001207	0	0	0	0	8	2.26	6	1.75	0	0	0	0	0	0	0	0	0	0	3	0.71	1	0.23	3	0.64
BMK_Unigene_001208	27	1.15	11	0.48	10	0.51	8	0.41	6	0.35	6	0.31	15	0.66	2	0.1	70	2.67	11	0.48	0	0	8	0.32
BMK_Unigene_001210	0	0	0	0	0	0	5	2.47	0	0	2	1	3	1.2	0	0	1	0.37	0	0	3	1.15	1	0.35
BMK_Unigene_001211	0	0	12	2.95	0	0	0	0	0	0	0	0	0	0	0	0	0	0	0	0	0	0	0	0
BMK_Unigene_001212	193	2.02	270	2.9	83	1.05	62	0.78	281	4.1	152	1.92	23	0.25	22	0.28	28	0.26	32	0.34	45	0.48	37	0.36
BMK_Unigene_001215	0	0	0	0	0	0	0	0	5	2.25	0	0	0	0	0	0	0	0	0	0	0	0	7	2.15
BMK_Unigene_001219	1071	31.25	1014	30.32	859	29.95	1432	50.28	1357	54.81	1298	45.78	167	5.08	18	0.64	90	2.33	36	1.1	80	2.36	74	2.01
BMK_Unigene_001221	16	1.27	20	1.63	2	0.19	12	1.15	26	2.82	7	0.68	4	0.33	1	0.09	16	1.14	16	1.29	7	0.55	2	0.15
BMK_Unigene_001229	0	0	0	0	0	0	0	0	4	1.98	1	0.48	0	0	0	0	0	0	0	0	0	0	0	0
BMK_Unigene_001230	3	0.38	10	1.35	13	1.93	1	0.15	6	1.01	10	1.52	15	1.95	15	2.17	0	0	8	1.01	2	0.25	8	0.91
BMK_Unigene_001233	121	2.47	140	2.92	65	1.6	96	2.35	17	0.49	75	1.85	593	12.5	606	14.69	231	4.17	423	8.79	509	10.36	171	3.24
BMK_Unigene_001236	458	17.08	752	28.7	405	18	318	14.28	313	16.1	519	23.39	1178	45.5	838	37.11	1569	51.99	821	31.21	1524	56.79	1300	44.84
BMK_Unigene_001237	0	0	0	0	7	2.41	0	0	0	0	0	0	0	0	3	0.97	0	0	1	0.29	0	0	0	0
BMK_Unigene_001240	2	0.63	4	1.3	0	0	0	0	5	2.05	0	0	0	0	0	0	0	0	0	0	0	0	2	0.56
BMK_Unigene_001242	1	0.08	2	0.17	0	0	3	0.31	54	6.36	0	0	10	0.88	1	0.1	19	1.45	0	0	2	0.17	8	0.62
BMK_Unigene_001244	116	1.96	151	2.61	52	1.05	62	1.26	187	4.4	91	1.85	17	0.31	3	0.06	6	0.09	5	0.09	6	0.11	12	0.2
BMK_Unigene_001249	0	0	0	0	0	0	0	0	0	0	0	0	1	0.34	11	4.05	7	2.18	0	0	0	0	2	0.59
BMK_Unigene_001250	0	0	1	0.15	3	0.51	0	0	0	0	0	0	13	1.9	2	0.33	3	0.39	0	0	0	0	2	0.26
BMK_Unigene_001251	92	2.78	51	1.59	129	4.66	43	1.58	33	1.4	116	4.25	41	1.3	38	1.37	92	2.48	40	1.26	16	0.5	23	0.65
BMK_Unigene_001253	433	9.25	70	1.53	1655	42.28	3436	88.32	63	1.87	543	14.04	1026	22.78	477	12.17	1181	22.41	7009	153.11	5972	127.99	4533	90.01
BMK_Unigene_001254	8	2.53	7	2.27	0	0	3	1.16	4	1.64	11	4.28	0	0	0	0	0	0	3	0.93	0	0	0	0
BMK_Unigene_001255	14	5.28	0	0	0	0	3	1.39	3	1.45	4	1.86	0	0	0	0	2	0.7	0	0	1	0.36	5	1.65
BMK_Unigene_001257	0	0	0	0	0	0	0	0	2	1.01	7	3.41	0	0	0	0	0	0	0	0	7	2.64	4	1.38
BMK_Unigene_001258	3	1.2	0	0	0	0	7	3.44	0	0	0	0	0	0	0	0	0	0	0	0	5	1.91	0	0
BMK_Unigene_001259	86	4.24	225	11.39	102	6.03	203	12.07	164	11.14	132	7.89	0	0	4	0.23	0	0	5	0.25	0	0	1	0.05
BMK_Unigene_001263	5	1.7	0	0	0	0	3	1.25	0	0	0	0	0	0	3	1.11	0	0	0	0	8	2.61	1	0.3
BMK_Unigene_001267	655	22.7	1496	53.06	44	1.82	6	0.25	1893	90.56	21	0.88	58	2.1	100	4.12	4	0.12	0	0	30	1.04	22	0.71
BMK_Unigene_001270	2	0.05	141	3.75	11	0.34	0	0	40	1.47	42	1.34	843	22.72	352	10.9	249	5.74	224	5.94	576	14.99	1367	32.93
BMK_Unigene_001272	322	8.69	365	10.08	263	8.49	222	7.22	295	11.03	390	12.7	3	0.08	72	2.33	22	0.53	21	0.58	6	0.16	108	2.7
BMK_Unigene_001282	0	0	0	0	0	0	0	0	0	0	0	0	1	0.24	0	0	4	0.85	17	3.91	0	0	3	0.62
BMK_Unigene_001284	0	0	0	0	0	0	0	0	0	0	0	0	3	0.52	0	0	2	0.31	7	1.2	11	1.84	0	0
BMK_Unigene_001285	2	0.39	3	0.6	2	0.47	0	0	0	0	1	0.24	0	0	0	0	11	1.96	0	0	0	0	5	0.88
BMK_Unigene_001289	0	0	0	0	0	0	1	0.05	0	0	0	0	5	0.23	1	0.05	16	0.63	47	2.13	9	0.4	23	0.94
BMK_Unigene_001290	150	3.87	320	8.49	71	2.19	68	2.11	168	6.05	102	3.21	103	2.77	102	3.14	105	2.41	97	2.56	71	1.84	131	3.14
BMK_Unigene_001291	4	1.56	0	0	0	0	0	0	0	0	0	0	6	2.33	0	0	0	0	0	0	3	1.12	0	0
BMK_Unigene_001293	0	0	0	0	0	0	0	0	3	0.38	8	0.9	6	0.57	0	0	13	1.08	7	0.66	20	1.84	2	0.17
BMK_Unigene_001295	179	31.17	347	62.02	95	19.64	31	6.56	307	71.42	91	19.34	53	9.43	77	15.31	61	9.64	45	7.84	35	5.99	38	5.98
BMK_Unigene_001301	157	3.48	512	11.62	14	0.37	4	0.11	1085	33.33	26	0.7	22	0.53	16	0.42	7	0.14	0	0	7	0.18	5	0.1
BMK_Unigene_001304	0	0	0	0	0	0	0	0	0	0	0	0	0	0	9	3.85	2	0.74	0	0	0	0	0	0
BMK_Unigene_001305	350	16.61	293	14.25	263	14.91	198	11.37	149	9.75	339	19.49	37	1.82	39	2.2	58	2.48	105	5.09	107	5.11	85	3.76
BMK_Unigene_001311	777	17.56	1001	23.19	363	9.81	327	8.91	1176	36.89	478	13.08	28	0.67	43	1.16	6	0.14	21	0.49	40	0.92	38	0.8
BMK_Unigene_001313	0	0	0	0	3	0.1	8	0.27	0	0	0	0	0	0	0	0	206	5.07	5	0.14	0	0	30	0.77
BMK_Unigene_001314	272	10.75	124	5.03	269	12.67	214	10.18	100	5.46	162	7.75	289	11.85	221	10.36	868	30.5	454	18.28	496	19.58	332	12.14
BMK_Unigene_001316	0	0	0	0	6	1.45	0	0	0	0	1	0.25	0	0	8	1.85	0	0	4	0.81	0	0	3	0.55
BMK_Unigene_001318	0	0	34	3.73	0	0	0	0	3	0.44	0	0	0	0	5	0.62	0	0	0	0	0	0	0	0
BMK_Unigene_001322	6	0.44	1	0.07	7	0.61	22	1.94	7	0.7	5	0.44	18	1.36	48	4.11	1	0.07	43	3.18	16	1.16	27	1.81
BMK_Unigene_001324	1	0.34	0	0	0	0	0	0	1	0.44	1	0.42	0	0	0	0	0	0	6	2	2	0.65	0	0
BMK_Unigene_001328	40	10.11	102	25.96	66	19.31	34	10.54	48	15.59	86	26.15	86	21.52	91	25.13	97	21.98	105	25.7	85	20.45	78	17.18
BMK_Unigene_001335	0	0	21	1.93	2	0.21	1	0.11	1	0.12	1	0.11	0	0	8	0.84	0	0	0	0	2	0.18	0	0
BMK_Unigene_001336	0	0	0	0	0	0	0	0	0	0	0	0	8	1.91	2	0.53	0	0	0	0	6	1.37	2	0.42
BMK_Unigene_001339	7	1.4	11	2.26	0	0	1	0.24	0	0	0	0	1	0.2	0	0	0	0	3	0.6	0	0	0	0
BMK_Unigene_001340	0	0	0	0	0	0	0	0	2	0.37	0	0	12	1.7	1	0.16	15	1.87	26	3.61	7	0.95	5	0.63
BMK_Unigene_001341	2749	38.37	2858	40.89	1709	28.52	1136	19.07	2416	46.89	1795	30.28	3930	57.07	2723	45.48	3747	46.39	2782	39.76	3974	55.69	3742	48.61
BMK_Unigene_001352	0	0	3	0.97	2	0.75	0	0	1	0.41	0	0	0	0	0	0	0	0	11	3.42	0	0	0	0
BMK_Unigene_001354	777	8.71	689	7.92	182	2.45	55	0.74	1229	19.17	132	1.8	369	4.31	426	5.72	240	2.39	189	2.17	246	2.77	339	3.54
BMK_Unigene_001360	731	61.45	160	13.86	1101	110.33	892	90.63	53	6.14	804	82.09	311	27.02	61	6.02	933	70.38	2237	190.67	1461	122.15	726	56.09
BMK_Unigene_001362	0	0	0	0	0	0	4	1.03	9	2.53	0	0	3	0.65	0	0	0	0	0	0	0	0	0	0
BMK_Unigene_001363	8	2.2	0	0	0	0	0	0	0	0	0	0	0	0	0	0	3	0.76	0	0	0	0	0	0
BMK_Unigene_001368	59	2.38	22	0.91	10	0.48	25	1.21	46	2.56	27	1.31	1	0.04	23	1.1	30	1.07	10	0.41	6	0.24	13	0.48
BMK_Unigene_001370	60	1.61	99	2.72	85	2.72	73	2.37	185	6.85	74	2.41	253	7.03	151	4.81	555	13.14	62	1.69	173	4.64	665	16.46
BMK_Unigene_001371	400	13.93	728	25.98	331	13.77	623	26.15	1232	59.29	797	33.6	712	25.75	242	10.04	3470	107.5	963	34.22	841	29.33	5625	181.55
BMK_Unigene_001373	3	0.58	0	0	0	0	0	0	0	0	0	0	3	0.6	2	0.44	14	2.48	7	1.36	5	0.95	0	0
BMK_Unigene_001376	0	0	5	1.55	0	0	0	0	2	0.79	0	0	12	3.65	15	4.99	0	0	0	0	6	1.75	16	4.27
BMK_Unigene_001379	4	0.8	5	1.03	0	0	0	0	15	3.99	0	0	1	0.2	0	0	0	0	3	0.6	0	0	0	0
BMK_Unigene_001382	15	4.39	15	4.51	12	4.16	12	4.3	3	1.15	8	2.88	6	1.77	0	0	16	4.31	2	0.58	19	5.38	0	0
BMK_Unigene_001384	17	1.66	9	0.9	15	1.74	7	0.83	11	1.46	17	2.01	8	0.8	4	0.46	3	0.26	5	0.49	10	0.97	0	0
BMK_Unigene_001388	0	0	2	0.82	0	0	0	0	2	1.01	3	1.47	5	1.98	2	0.85	1	0.37	9	3.48	10	3.79	1	0.35
BMK_Unigene_001390	509	8.42	314	5.32	240	4.75	229	4.56	306	7.03	367	7.35	116	2.01	25	0.5	152	2.24	196	3.33	144	2.4	103	1.6
BMK_Unigene_001395	112	19.22	112	19.88	67	13.85	31	6.46	163	37.39	72	15.17	22	3.86	15	2.94	44	6.85	14	2.41	6	1.01	68	10.55
BMK_Unigene_001398	0	0	0	0	0	0	2	0.38	2	0.42	0	0	0	0	0	0	0	0	4	0.63	0	0	15	2.13
BMK_Unigene_001406	0	0	0	0	0	0	0	0	2	0.62	0	0	0	0	0	0	9	1.94	0	0	0	0	0	0
BMK_Unigene_001407	1180	12.49	2272	24.65	992	12.57	2304	29.33	509	7.5	1761	22.52	452	4.99	445	5.65	108	1.02	160	1.74	211	2.25	116	1.15
BMK_Unigene_001408	0	0	0	0	0	0	0	0	4	0.53	0	0	0	0	17	1.93	9	0.78	0	0	0	0	7	0.62
BMK_Unigene_001411	14	0.33	35	0.84	15	0.42	5	0.14	78	2.55	21	0.6	54	1.33	21	0.59	34	0.71	34	0.84	52	1.24	65	1.42
BMK_Unigene_001412	0	0	0	0	0	0	8	3.39	0	0	0	0	8	2.77	0	0	1	0.32	0	0	0	0	0	0
BMK_Unigene_001414	405	5.47	330	4.56	225	3.62	222	3.61	367	6.87	236	3.84	374	5.24	293	4.72	778	9.3	547	7.55	490	6.63	450	5.65
BMK_Unigene_001416	0	0	0	0	42	1.05	374	9.42	3	0.09	0	0	0	0	0	0	0	0	2	0.06	0	0	0	0
BMK_Unigene_001420	1	0.23	0	0	2	0.55	32	9.06	0	0	2	0.57	0	0	0	0	0	0	7	1.62	0	0	0	0
BMK_Unigene_001421	30	0.47	82	1.34	10	0.19	24	0.46	88	1.94	24	0.47	250	4.1	222	4.19	216	3.02	160	2.58	176	2.8	274	4.02
BMK_Unigene_001425	0	0	13	3.21	0	0	0	0	0	0	0	0	0	0	0	0	0	0	0	0	0	0	6	1.29
BMK_Unigene_001426	4	0.39	1	0.1	1	0.12	3	0.35	1	0.13	1	0.12	2	0.2	0	0	4	0.35	0	0	25	2.41	0	0
BMK_Unigene_001428	21	0.34	27	0.46	25	0.48	17	0.34	58	1.3	17	0.33	825	13.75	275	5.28	758	10.78	449	7.36	958	15.41	438	6.53
BMK_Unigene_001436	29	7.13	18	4.54	20	5.82	12	3.6	15	4.85	6	1.81	19	4.74	18	4.95	10	2.25	28	6.82	8	1.91	20	4.39
BMK_Unigene_001438	0	0	0	0	0	0	0	0	0	0	5	2.32	0	0	6	2.44	0	0	0	0	0	0	0	0
BMK_Unigene_001442	0	0	0	0	0	0	0	0	0	0	0	0	0	0	0	0	0	0	7	1.83	10	2.57	0	0
BMK_Unigene_001443	1	0.22	9	2	0	0	0	0	0	0	0	0	0	0	0	0	0	0	0	0	2	0.42	0	0
BMK_Unigene_001449	0	0	0	0	0	0	0	0	4	1.45	7	2.38	2	0.56	7	2.15	3	0.76	7	1.91	2	0.54	4	0.98
BMK_Unigene_001450	86	1.81	188	4.06	64	1.63	37	0.95	159	4.64	44	1.13	61	1.35	22	0.57	2	0.04	10	0.22	80	1.7	12	0.24
BMK_Unigene_001451	16	2.18	25	3.5	3	0.49	14	2.32	14	2.57	4	0.66	2	0.28	5	0.79	4	0.49	1	0.14	9	1.21	4	0.5
BMK_Unigene_001453	1	0.21	0	0	1	0.24	8	2.01	5	1.37	0	0	0	0	1	0.23	0	0	0	0	0	0	0	0
BMK_Unigene_001457	0	0	7	0.91	0	0	0	0	18	3.07	0	0	0	0	0	0	2	0.23	0	0	0	0	4	0.46
BMK_Unigene_001458	83	1.94	129	3.08	65	1.83	63	1.77	156	5.03	101	2.86	306	7.4	253	7.02	293	6.06	630	14.96	441	10.29	298	6.45
BMK_Unigene_001461	19	1.23	86	5.7	0	0	0	0	52	4.61	19	1.49	0	0	0	0	3	0.17	0	0	0	0	0	0
BMK_Unigene_001462	116	2.68	0	0	38	1.05	32	0.89	67	2.17	15	0.42	0	0	0	0	2	0.04	0	0	1	0.02	0	0
BMK_Unigene_001463	7	2.25	0	0	3	1.14	0	0	0	0	0	0	4	1.29	2	0.7	6	1.78	1	0.32	6	1.86	6	1.7
BMK_Unigene_001469	15	0.31	31	0.66	8	0.2	9	0.22	4	0.11	0	0	39	0.84	41	1.01	70	1.3	59	1.25	45	0.93	99	1.9
BMK_Unigene_001470	591	24.98	597	25.9	418	21.1	363	18.49	483	28.17	340	17.44	580	25.43	344	17.26	422	15.91	324	13.97	264	11.2	400	15.66
BMK_Unigene_001474	2	0.42	0	0	0	0	1	0.25	0	0	0	0	2	0.42	0	0	2	0.38	3	0.62	0	0	10	1.87
BMK_Unigene_001476	0	0	0	0	8	2.67	0	0	0	0	0	0	0	0	0	0	2	0.52	0	0	0	0	0	0
BMK_Unigene_001480	11	0.21	8	0.15	3	0.07	0	0	5	0.15	0	0	54	1.07	115	2.6	97	1.64	96	1.85	117	2.21	99	1.74
BMK_Unigene_001488	75	1.67	87	2	30	0.82	21	0.58	126	3.89	15	0.4	49	1.13	73	1.94	66	1.32	44	1	52	1.16	42	0.87
BMK_Unigene_001489	142	1.95	216	3.04	98	1.61	64	1.06	135	2.58	93	1.54	136	1.96	81	1.33	228	2.78	142	2	138	1.91	168	2.15
BMK_Unigene_001490	3	1.12	0	0	7	3.1	0	0	0	0	4	1.85	0	0	0	0	4	1.39	0	0	0	0	0	0
BMK_Unigene_001492	13	2.38	0	0	3	0.65	0	0	3	0.73	3	0.67	1	0.19	0	0	0	0	0	0	4	0.72	0	0
BMK_Unigene_001493	27	0.58	21	0.47	17	0.45	31	0.81	37	1.11	6	0.16	262	5.82	123	3.14	134	2.54	119	2.6	177	3.79	138	2.75
BMK_Unigene_001497	788	10.97	662	9.46	386	6.44	317	5.32	474	9.18	565	9.52	1012	14.66	1095	18.25	1419	17.53	1054	15.03	815	11.41	1082	14.03
BMK_Unigene_001498	1229	12.03	1211	12.15	702	8.22	304	3.58	1152	15.7	710	8.39	121	1.24	187	2.2	238	2.07	107	1.07	125	1.24	107	0.98
BMK_Unigene_001500	273	4.81	169	3.05	146	3.08	107	2.28	201	4.92	130	2.77	8	0.15	4	0.09	83	1.3	50	0.91	96	1.71	18	0.31
BMK_Unigene_001502	845	7.47	683	6.19	466	4.93	319	3.39	467	5.75	577	6.16	4892	45.02	3830	40.59	8703	68.2	5154	46.68	7732	68.68	6073	50.02
BMK_Unigene_001505	4	1.39	0	0	2	0.82	0	0	0	0	0	0	2	0.7	2	0.76	9	2.89	5	1.7	0	0	0	0
BMK_Unigene_001510	233	2.53	325	3.61	152	1.97	161	2.1	203	3.08	254	3.32	1650	18.62	1285	16.68	1170	11.24	1086	12.06	1808	19.68	1410	14.23
BMK_Unigene_001511	1332	26.72	1563	32.13	654	15.68	581	14.03	1218	33.93	768	18.62	761	15.87	899	21.55	895	15.94	495	10.15	791	15.92	757	14.12
BMK_Unigene_001514	8	1.41	6	1.08	0	0	6	1.28	9	2.12	3	0.65	5	0.9	18	3.62	7	1.12	0	0	3	0.52	4	0.64
BMK_Unigene_001517	0	0	0	0	0	0	0	0	0	0	0	0	0	0	0	0	0	0	11	3.12	0	0	0	0
BMK_Unigene_001518	65	0.71	27	0.31	47	0.62	30	0.4	83	1.26	50	0.65	335	3.78	287	3.72	299	2.87	503	5.58	195	2.12	549	5.53
BMK_Unigene_001519	0	0	3	0.27	0	0	5	0.53	0	0	0	0	3	0.27	2	0.2	7	0.55	7	0.62	6	0.52	28	2.24
BMK_Unigene_001521	0	0	10	0.43	0	0	6	0.3	6	0.35	4	0.2	43	1.87	29	1.45	22	0.82	31	1.33	46	1.93	20	0.78
BMK_Unigene_001525	508	11.41	561	12.92	338	9.1	306	8.28	753	23.48	336	9.13	110	2.57	211	5.67	111	2.23	149	3.44	138	3.13	88	1.86
BMK_Unigene_001527	180	5.5	318	9.97	156	5.72	75	2.76	173	7.32	155	5.76	309	9.81	242	8.83	200	5.43	144	4.51	232	7.12	181	5.14
BMK_Unigene_001528	617	10.21	456	7.74	272	5.38	245	4.89	354	8.14	292	5.85	4	0.08	6	0.14	17	0.26	24	0.41	20	0.34	9	0.15
BMK_Unigene_001533	299	5.75	281	5.56	214	4.94	219	5.09	236	6.33	232	5.4	94	1.88	57	1.33	86	1.48	119	2.35	154	2.99	77	1.38
BMK_Unigene_001535	16	1.34	15	1.29	4	0.4	18	1.82	20	2.29	4	0.41	10	0.87	5	0.49	5	0.38	15	1.27	19	1.62	3	0.23
BMK_Unigene_001536	17	0.49	23	0.64	2	0.06	12	0.39	42	1.57	5	0.16	55	1.54	20	0.64	57	1.37	86	2.37	43	1.16	38	0.95
BMK_Unigene_001541	0	0	0	0	5	1.9	0	0	0	0	0	0	3	0.97	0	0	0	0	0	0	0	0	0	0
BMK_Unigene_001543	0	0	3	0.94	0	0	0	0	0	0	0	0	0	0	0	0	0	0	7	2.11	3	0.89	5	1.35
BMK_Unigene_001544	0	0	0	0	0	0	5	1.38	0	0	0	0	1	0.23	0	0	0	0	0	0	11	2.43	1	0.2
BMK_Unigene_001545	34	2.73	12	0.97	10	0.94	51	4.87	4	0.43	27	2.59	1	0.08	0	0	17	1.2	3	0.24	5	0.39	11	0.8
BMK_Unigene_001551	7	2	2	0.59	0	0	0	0	4	1.49	3	1.05	0	0	2	0.63	0	0	0	0	0	0	1	0.25
BMK_Unigene_001555	0	0	0	0	0	0	0	0	0	0	5	2.21	0	0	3	1.17	0	0	0	0	0	0	0	0
BMK_Unigene_001558	2	0.05	3	0.1	0	0	1	0.05	6	0.2	3	0.09	71	1.77	50	1.43	146	3.13	157	3.84	270	6.5	162	3.6
BMK_Unigene_001562	6476	179.87	7827	222.78	4141	137.43	5225	174.68	3779	145.38	3343	112.28	717	20.7	467	15.47	207	5.13	1030	29.23	428	11.93	619	15.97
BMK_Unigene_001563	32	3.22	0	0	52	6.24	677	82.53	5	0.68	18	2.2	0	0	3	0.35	0	0	0	0	0	0	0	0
BMK_Unigene_001567	20	1.86	13	1.26	15	1.71	2	0.23	53	6.58	25	2.79	14	1.36	36	3.86	33	2.66	55	5.01	25	2.29	21	1.8
BMK_Unigene_001575	0	0	0	0	0	0	0	0	0	0	0	0	265	16.65	162	11.6	23	1.25	85	5.24	15	0.91	159	8.9
BMK_Unigene_001577	541	24.96	442	20.9	380	20.93	191	10.62	501	31.86	144	8.04	430	20.57	596	32.61	217	8.92	122	5.78	326	15.04	471	20.1
BMK_Unigene_001584	3654	36.11	6201	62.8	977	11.55	1773	21.07	1630	22.43	1047	12.51	229	2.36	441	5.22	298	2.61	218	2.21	286	2.85	327	3.02
BMK_Unigene_001589	1481	12.26	2404	20.4	712	7.06	522	5.2	1823	21.01	969	9.69	418	3.6	244	2.43	289	2.12	267	2.27	237	1.97	285	2.2
BMK_Unigene_001591	0	0	0	0	0	0	0	0	0	0	2	0.72	0	0	0	0	0	0	0	0	9	2.56	0	0
BMK_Unigene_001597	96	2.05	77	1.68	51	1.31	176	4.49	21	0.64	98	2.51	2	0.06	6	0.15	3	0.06	5	0.11	4	0.1	13	0.26
BMK_Unigene_001600	113	1.1	190	1.89	94	1.09	82	0.96	86	1.17	69	0.81	420	4.23	581	6.73	470	4.03	370	3.67	540	5.25	513	4.62
BMK_Unigene_001601	4	0.74	1	0.19	0	0	2	0.45	7	1.74	4	0.91	3	0.57	0	0	0	0	0	0	10	1.83	4	0.67
BMK_Unigene_001602	60	1.43	62	1.51	36	1.03	20	0.57	43	1.42	49	1.41	129	3.2	68	1.95	46	0.97	77	1.88	75	1.79	54	1.2
BMK_Unigene_001607	13	1.44	1	0.11	0	0	0	0	21	3.15	0	0	0	0	0	0	0	0	3	0.34	0	0	0	0
BMK_Unigene_001608	0	0	0	0	0	0	0	0	0	0	0	0	0	0	0	0	5	0.3	45	3.03	2	0.13	10	0.61
BMK_Unigene_001615	3	0.61	3	0.63	0	0	9	2.23	0	0	0	0	0	0	0	0	0	0	1	0.2	0	0	2	0.37
BMK_Unigene_001623	0	0	0	0	0	0	3	0.35	0	0	0	0	5	0.49	0	0	1	0.09	13	1.26	22	2.09	0	0
BMK_Unigene_001624	3	0.23	0	0	5	0.45	23	2.09	0	0	4	0.37	0	0	0	0	0	0	0	0	2	0.15	0	0
BMK_Unigene_001626	26	1.36	38	2.04	6	0.37	12	0.76	13	0.94	22	1.39	1	0.05	4	0.25	0	0	0	0	9	0.47	1	0.05
BMK_Unigene_001627	14	0.59	20	0.87	15	0.76	14	0.71	52	3.03	8	0.41	2	0.09	10	0.52	20	0.75	12	0.52	4	0.17	10	0.39
BMK_Unigene_001633	90	2.36	88	2.37	41	1.29	11	0.35	129	4.69	36	1.15	79	2.15	64	2.03	29	0.69	75	2.02	72	1.9	106	2.6
BMK_Unigene_001642	2135	54.89	2563	67.52	1510	46.4	2081	64.38	1138	40.56	2346	72.92	2550	68.1	969	29.71	893	20.41	1064	27.95	510	13.16	228	5.46
BMK_Unigene_001643	1	0.21	2	0.44	0	0	0	0	0	0	0	0	1	0.22	2	0.48	12	2.34	3	0.64	0	0	2	0.38
BMK_Unigene_001645	1745	58.01	13	0.44	613	24.35	2026	81.11	15	0.69	1202	48.33	0	0	0	0	3	0.09	64	2.17	0	0	6	0.18
BMK_Unigene_001646	0	0	0	0	0	0	0	0	0	0	0	0	1	0.21	0	0	19	3.52	20	4.06	0	0	3	0.55
BMK_Unigene_001648	14	2.8	27	5.54	7	1.66	8	1.95	18	4.79	19	4.65	0	0	0	0	3	0.55	2	0.4	2	0.39	6	1.08
BMK_Unigene_001649	5139	43.04	7967	68.37	3091	30.97	2391	24.07	3960	46.18	4755	48.09	348	3.04	263	2.65	810	6.01	574	4.93	765	6.44	476	3.72
BMK_Unigene_001655	0	0	0	0	0	0	10	1.83	0	0	0	0	0	0	7	1.21	1	0.14	37	5.61	0	0	0	0
BMK_Unigene_001657	2	0.62	0	0	5	1.82	7	2.64	0	0	0	0	0	0	4	1.36	0	0	0	0	0	0	0	0
BMK_Unigene_001660	122	5.45	121	5.53	47	2.5	20	1.08	125	7.69	40	2.16	3	0.14	0	0	0	0	0	0	8	0.36	1	0.04
BMK_Unigene_001661	2958	125.15	3276	142.03	2298	116.1	1445	73.68	2629	153.5	2554	130.79	7251	318.2	6255	314.07	9818	370	7333	316.3	8895	376.42	10429	408.51
BMK_Unigene_001665	5	0.18	1	0.04	2	0.08	1	0.04	5	0.24	26	1.11	11	0.4	25	1.05	10	0.31	52	1.87	3	0.11	12	0.39
BMK_Unigene_001669	0	0	47	18.33	10	4.48	10	4.67	10	4.87	4	1.88	4	1.52	0	0	5	1.76	2	0.74	3	1.09	1	0.33
BMK_Unigene_001676	143	4.78	113	3.87	120	4.79	134	5.39	157	7.26	134	5.42	128	4.44	116	4.61	37	1.1	70	2.39	122	4.08	121	3.75
BMK_Unigene_001677	413	10.36	404	10.4	266	7.99	178	5.38	455	15.83	278	8.46	1852	48.26	781	23.37	2050	45.68	1045	26.8	1291	32.47	822	19.16
BMK_Unigene_001679	34	11.36	3	1.02	31	12.15	15	6.1	3	1.29	29	11.86	3	1	0	0	0	0	2	0.65	0	0	1	0.29
BMK_Unigene_001684	3	1.1	11	4.16	4	1.74	0	0	6	2.84	3	1.36	3	1.11	0	0	2	0.68	3	1.08	0	0	2	0.64
BMK_Unigene_001686	38	0.53	55	0.77	71	1.17	62	1.02	42	0.8	65	1.08	666	9.42	556	9.05	205	2.48	634	8.83	494	6.75	592	7.5
BMK_Unigene_001687	6	0.21	24	0.88	3	0.13	81	3.49	33	1.63	22	0.95	0	0	2	0.09	0	0	16	0.59	0	0	23	0.76
BMK_Unigene_001689	1233	55	1169	53.46	744	39.61	792	42.59	1082	66.55	1025	55.34	1306	60.43	1160	61.38	1886	74.96	1499	68.16	1861	83.01	1408	58.12
BMK_Unigene_001693	2	0.08	6	0.25	4	0.19	1	0.05	0	0	3	0.14	993	41.17	765	36.31	2471	87.89	1850	75.36	1899	75.87	1392	51.51
BMK_Unigene_001694	4	0.55	4	0.56	1	0.16	0	0	17	3.15	2	0.34	5	0.71	0	0	0	0	1	0.14	0	0	1	0.13
BMK_Unigene_001696	286	5.42	315	6.14	224	5.09	300	6.85	306	8.07	366	8.39	601	11.84	433	9.81	952	16.02	1057	20.51	893	16.99	713	12.58
BMK_Unigene_001697	0	0	0	0	3	1.3	5	2.25	0	0	0	0	2	0.73	0	0	0	0	0	0	0	0	0	0
BMK_Unigene_001698	75	3.56	39	1.9	34	1.92	30	1.71	8	0.52	32	1.84	28	1.38	38	2.14	18	0.76	16	0.77	58	2.75	15	0.69
BMK_Unigene_001699	98	1.53	156	2.47	19	0.35	20	0.37	40	0.86	44	0.82	2072	33.31	3122	57.73	612	8.4	493	7.81	474	7.37	243	3.51
BMK_Unigene_001706	0	0	2	0.82	0	0	0	0	4	2.04	0	0	0	0	0	0	0	0	0	0	0	0	3	1.04
BMK_Unigene_001707	11	2.52	0	0	0	0	0	0	0	0	0	0	0	0	2	0.51	1	0.21	0	0	0	0	0	0
BMK_Unigene_001709	0	0	0	0	2	0.65	0	0	0	0	0	0	0	0	0	0	3	0.75	0	0	7	1.86	0	0
BMK_Unigene_001710	1412	27.39	1302	25.88	1322	30.65	1490	34.77	751	20.25	1566	36.71	1215	24.51	949	22	2612	44.99	1890	37.5	2023	39.39	1647	29.71
BMK_Unigene_001711	0	0	1	0.3	0	0	0	0	3	1.14	0	0	0	0	0	0	0	0	1	0.29	7	1.97	0	0
BMK_Unigene_001712	0	0	0	0	0	0	0	0	0	0	0	0	5	0.7	25	3.93	0	0	4	0.55	8	1.08	1	0.12
BMK_Unigene_001719	3	0.54	1	0.19	0	0	0	0	2	0.48	0	0	0	0	10	2.06	1	0.16	0	0	0	0	0	0
BMK_Unigene_001723	0	0	8	2.02	0	0	0	0	0	0	0	0	11	2.74	7	1.93	0	0	9	2.19	8	1.91	4	0.88
BMK_Unigene_001726	0	0	3	1.17	0	0	0	0	0	0	0	0	4	1.52	3	1.23	3	1.06	2	0.74	6	2.18	1	0.33
BMK_Unigene_001728	6	0.29	17	0.85	0	0	0	0	11	0.74	5	0.3	8	0.44	4	0.23	25	1.09	41	2.05	19	0.93	10	0.45
BMK_Unigene_001729	3	0.52	0	0	0	0	0	0	1	0.23	0	0	12	2.14	4	0.8	14	2.22	39	6.82	41	7.03	36	5.68
BMK_Unigene_001730	6	0.27	6	0.28	1	0.05	0	0	22	1.29	0	0	491	20.96	486	23.76	72	2.65	279	11.74	55	2.3	519	19.79
BMK_Unigene_001731	17	2.62	4	0.6	3	0.54	10	1.78	1	0.32	9	1.6	0	0	0	0	0	0	0	0	0	0	0	0
BMK_Unigene_001733	3	0.53	0	0	3	0.63	2	0.43	9	2.13	0	0	0	0	0	0	0	0	0	0	0	0	0	0
BMK_Unigene_001736	82	1.17	32	0.47	31	0.53	57	0.99	52	1.02	11	0.2	677	9.97	718	12.17	1396	17.53	1174	17.02	924	13.14	796	10.49
BMK_Unigene_001737	10	0.18	12	0.22	6	0.13	4	0.09	13	0.32	7	0.15	304	5.63	215	4.59	87	1.37	220	4.02	341	6.1	180	2.98
BMK_Unigene_001742	483	14.12	732	21.93	329	11.49	243	8.58	715	28.96	429	15.18	163	4.95	18	0.64	93	2.43	20	0.6	17	0.5	25	0.68
BMK_Unigene_001743	7	0.95	6	0.84	2	0.32	0	0	18	3.3	0	0	0	0	0	0	0	0	0	0	0	0	2	0.25
BMK_Unigene_001745	442	10.34	623	14.95	214	5.98	88	2.48	642	20.83	273	7.72	688	16.72	366	10.21	592	12.3	245	5.86	479	11.23	724	15.73
BMK_Unigene_001746	16	1.08	37	2.56	7	0.56	8	0.65	11	1.02	15	1.25	20	1.4	17	1.35	41	2.48	34	2.33	25	1.68	32	1.99
BMK_Unigene_001747	24	4.17	22	3.92	5	1.03	0	0	45	10.62	3	0.64	2	0.35	0	0	2	0.31	0	0	2	0.34	0	0
BMK_Unigene_001749	2	0.14	0	0	0	0	0	0	0	0	0	0	0	0	0	0	0	0	2	0.14	28	1.95	0	0
BMK_Unigene_001750	506	13.36	685	18.5	414	13.03	314	9.96	483	17.64	477	15.23	320	8.79	297	9.33	383	8.97	347	9.35	339	8.95	328	8.03
BMK_Unigene_001752	44	16.81	18	7.07	16	7.21	14	6.57	19	9.3	31	14.64	17	6.49	22	9.08	25	8.87	24	8.95	21	7.68	20	6.68
BMK_Unigene_001753	249	5.43	174	3.88	181	4.71	101	2.64	235	7.09	124	3.26	285	6.45	195	5.07	202	3.91	162	3.61	442	9.65	248	5.03
BMK_Unigene_001754	0	0	7	2.47	0	0	0	0	1	0.44	0	0	0	0	0	0	1	0.32	0	0	0	0	0	0
BMK_Unigene_001755	1	0.06	2	0.11	0	0	0	0	0	0	0	0	7	0.41	5	0.33	40	2	18	1.03	36	2.02	31	1.6
BMK_Unigene_001756	0	0	0	0	0	0	0	0	0	0	4	0.86	0	0	0	0	15	2.4	0	0	0	0	0	0
BMK_Unigene_001761	5	1.98	0	0	0	0	0	0	0	0	0	0	0	0	0	0	0	0	0	0	3	1.14	0	0
BMK_Unigene_001762	8	1.69	0	0	0	0	0	0	0	0	0	0	1	0.21	0	0	0	0	9	1.89	2	0.41	0	0
BMK_Unigene_001767	0	0	11	1.07	0	0	0	0	14	1.81	0	0	0	0	0	0	0	0	0	0	0	0	0	0
BMK_Unigene_001768	23	1.22	2	0.11	2	0.13	32	2.05	18	1.32	9	0.58	177	9.74	180	11.31	64	3.04	141	7.62	156	8.28	122	5.99
BMK_Unigene_001770	3	0.41	2	0.28	0	0	18	2.96	0	0	0	0	0	0	0	0	0	0	2	0.27	0	0	0	0
BMK_Unigene_001771	1286	70.43	937	52.57	22	1.44	242	16.03	646	48.67	524	34.75	1603	90.93	973	62.97	582	28.43	373	20.83	3031	165.69	1109	56.12
BMK_Unigene_001772	4	0.53	15	2.02	0	0	0	0	3	0.53	2	0.32	0	0	0	0	0	0	0	0	2	0.26	1	0.12
BMK_Unigene_001774	0	0	6	1.74	0	0	0	0	0	0	0	0	5	1.42	2	0.62	0	0	4	1.11	1	0.27	19	4.75
BMK_Unigene_001777	6	0.15	0	0	0	0	3	0.09	1	0.03	0	0	2	0.05	4	0.12	90	2.01	636	16.36	86	2.17	29	0.68
BMK_Unigene_001780	467	7.29	336	5.37	382	7.12	644	12.08	195	4.23	536	10.1	1377	22.32	822	15.33	31014	428.72	21143	337.12	4225	66.08	2520	36.54
BMK_Unigene_001782	5	1.42	1	0.29	31	10.39	14	4.85	5	1.85	13	4.52	0	0	0	0	0	0	0	0	0	0	0	0
BMK_Unigene_001785	3	0.79	0	0	0	0	0	0	0	0	0	0	0	0	0	0	2	0.48	9	2.33	0	0	0	0
BMK_Unigene_001786	1029	26.11	1014	26.38	702	21.31	936	28.6	926	32.58	896	27.5	564	14.87	570	17.27	954	21.51	633	16.43	598	15.22	596	14.05
BMK_Unigene_001790	24	0.42	63	1.14	2	0.04	13	0.28	41	1.01	5	0.11	71	1.31	134	2.83	15	0.24	0	0	53	0.94	97	1.6
BMK_Unigene_001792	3	1.19	0	0	0	0	8	3.91	0	0	0	0	0	0	0	0	0	0	3	1.16	0	0	0	0
BMK_Unigene_001796	12	3.17	0	0	0	0	0	0	0	0	0	0	0	0	0	0	0	0	0	0	0	0	0	0
BMK_Unigene_001798	0	0	0	0	0	0	0	0	2	1	0	0	0	0	0	0	6	2.17	0	0	0	0	0	0
BMK_Unigene_001799	0	0	1	0.24	0	0	0	0	1	0.31	0	0	0	0	8	2.13	0	0	0	0	4	0.92	5	1.06
BMK_Unigene_001801	0	0	6	0.98	11	2.09	1	0.19	1	0.21	0	0	0	0	0	0	0	0	0	0	0	0	1	0.14
BMK_Unigene_001805	0	0	0	0	6	2.08	0	0	0	0	0	0	0	0	0	0	2	0.54	0	0	0	0	0	0
BMK_Unigene_001809	0	0	0	0	0	0	0	0	6	2.87	0	0	0	0	0	0	0	0	0	0	0	0	0	0
BMK_Unigene_001810	2	0.74	0	0	2	1.25	11	5	11	5.23	0	0	9	3.33	1	0.4	6	2.2	3	1.09	8	2.84	7	2.27
BMK_Unigene_001813	0	0	2	0.47	0	0	0	0	0	0	0	0	2	0.46	13	3.34	1	0.21	7	1.59	0	0	2	0.41
BMK_Unigene_001814	0	0	3	0.3	0	0	0	0	25	3.34	3	0.36	8	0.81	7	0.8	2	0.18	5	0.5	11	1.07	1	0.09
BMK_Unigene_001818	143	3.78	61	1.65	46	1.45	8	0.25	108	3.99	26	0.83	37	1.02	7	0.22	15	0.35	4	0.11	31	0.82	7	0.17
BMK_Unigene_001823	200	6.96	365	13.02	308	12.81	123	5.16	160	7.7	397	16.72	239	8.64	279	11.59	316	9.79	250	8.88	419	14.6	268	8.65
BMK_Unigene_001826	0	0	1	0.06	0	0	0	0.05	3	0.24	0	0	256	12.62	215	12.08	28	1.21	102	4.97	50	2.37	162	7.11
BMK_Unigene_001828	1366	21.96	956	15.75	1103	21.2	629	12.17	589	13.17	889	17.28	1914	32	809	15.55	2271	32.39	1163	19.13	1182	19.07	1055	15.79
BMK_Unigene_001829	716	15.82	593	13.43	466	12.32	494	13.13	518	15.86	463	12.37	144	3.3	194	5.13	325	6.38	202	4.56	240	5.33	249	5.12
BMK_Unigene_001830	1	0.13	0	0	1	0.15	0	0	0	0	0	0	0	0	4	0.58	16	1.81	1	0.13	2	0.25	2	0.23
BMK_Unigene_001835	1	0.1	1	0.11	3	0.37	0	0	1	0.14	0	0	1	0.11	7	0.85	34	3.2	18	1.91	8	0.83	13	1.25
BMK_Unigene_001837	4	0.19	4	0.19	8	0.45	24	1.41	19	1.23	0	0	0	0	12	0.67	16	0.67	13	0.62	4	0.19	55	2.43
BMK_Unigene_001839	0	0	3	0.96	0	0	0	0	7	2.83	0	0	0	0	0	0	1	0.29	1	0.31	0	0	14	3.85
BMK_Unigene_001840	3	0.48	3	0.49	0	0	0	0	0	0	5	0.97	11	1.79	0	0	3	0.43	3	0.48	2	0.31	0	0
BMK_Unigene_001842	13	0.85	5	0.32	134	10	135	10.18	15	1.29	92	6.96	14	0.9	0	0	8	0.45	192	12.21	58	3.67	47	2.75
BMK_Unigene_001844	236	4.16	426	7.7	138	2.92	202	4.28	262	6.4	203	4.32	897	16.42	654	13.77	909	14.2	768	13.83	868	15.33	1423	23.28
BMK_Unigene_001845	5	0.29	3	0.18	0	0	0	0	0	0	0	0	0	0	0	0	17	0.88	5	0.3	2	0.12	56	3.01
BMK_Unigene_001846	0	0	0	0	0	0	5	2.12	0	0	0	0	2	0.58	0	0	3	0.8	1	0.28	0	0	0	0
BMK_Unigene_001847	32	7.06	50	11.18	16	4.37	8	2.12	31	9.1	28	7.46	8	1.77	2	0.49	6	1.19	4	0.87	5	1.06	5	1.17
BMK_Unigene_001849	0	0	0	0	1	0.06	0	0	1	0.07	5	0.36	22	1.13	4	0.24	25	1.11	51	2.58	7	0.4	16	0.73
BMK_Unigene_001852	0	0	0	0	0	0	4	1.83	2	0.96	0	0	0	0	3	1.21	0	0	0	0	0	0	0	0
BMK_Unigene_001853	20	0.7	51	1.83	16	0.67	4	0.17	45	2.18	6	0.25	3	0.11	3	0.13	4	0.12	0	0	4	0.14	0	0
BMK_Unigene_001855	2	0.08	9	0.36	3	0.14	11	0.52	0	0	4	0.19	6	0.24	5	0.23	7	0.24	126	5.05	6	0.24	41	1.49
BMK_Unigene_001857	12	1.41	25	3.01	2	0.28	1	0.14	3	0.48	9	1.29	1	0.12	0	0	0	0	3	0.36	5	0.58	0	0
BMK_Unigene_001860	21	1.35	5	0.33	36	2.75	0	0	8	0.7	3	0.23	0	0	0	0	6	0.34	0	0	1	0.06	0	0
BMK_Unigene_001861	5	1.6	1	0.33	0	0	0	0	2	0.83	0	0	7	2.25	0	0	0	0	0	0	0	0	0	0
BMK_Unigene_001862	2	0.72	0	0	0	0	0	0	0	0	0	0	5	1.81	0	0	0	0	0	0	0	0	0	0
BMK_Unigene_001866	0	0	0	0	0	0	1	0.13	4	0.56	0	0	32	3.43	6	0.73	0	0	15	1.58	1	0.1	24	2.29
BMK_Unigene_001869	0	0	0	0	0	0	3	1.4	0	0	1	0.47	0	0	0	0	0	0	0	0	6	2.18	0	0
BMK_Unigene_001874	6	1.43	0	0	1	0.28	3	0.87	5	1.57	0	0	0	0	7	1.87	0	0	0	0	1	0.23	0	0
BMK_Unigene_001875	0	0	0	0	0	0	3	1.06	3	1.13	0	0	0	0	0	0	0	0	9	2.57	0	0	0	0
BMK_Unigene_001877	8	2.5	6	1.93	0	0	0	0	6	2.44	0	0	0	0	0	0	0	0	0	0	6	1.81	4	1.1
BMK_Unigene_001882	0	0	6	1.89	0	0	0	0	1	0.4	0	0	0	0	0	0	1	0.28	0	0	0	0	0	0
BMK_Unigene_001883	10	0.28	107	3.06	57	1.9	11	0.37	35	1.35	41	1.38	4	0.12	3	0.1	14	0.35	3	0.09	7	0.2	24	0.62
BMK_Unigene_001884	5	1.72	5	1.76	0	0	0	0	3	1.33	0	0	0	0	6	2.25	3	0.95	8	2.69	13	4.29	0	0
BMK_Unigene_001886	41	0.62	26	0.41	39	0.7	17	0.31	27	0.56	35	0.64	59	0.92	177	3.17	94	1.25	156	2.39	74	1.13	99	1.38
BMK_Unigene_001890	5	0.42	4	0.34	5	0.5	25	2.54	9	1.03	22	2.24	1	0.09	2	0.2	0	0	0	0	3	0.25	7	0.54
BMK_Unigene_001891	2	0.71	4	1.45	0	0	0	0	4	1.82	0	0	0	0	0	0	4	1.31	0	0	12	4.07	2	0.62
BMK_Unigene_001895	6	1.33	0	0	0	0	2	0.54	11	3.22	3	0.81	0	0	0	0	0	0	0	0	0	0	5	0.99
BMK_Unigene_001896	0	0	0	0	0	0	5	2.21	0	0	0	0	0	0	0	0	3	1	0	0	0	0	0	0
BMK_Unigene_001898	0	0	0	0	0	0	2	0.34	2	0.38	2	0.34	6	0.86	0	0	18	2.27	16	2.24	3	0.41	1	0.13
BMK_Unigene_001899	0	0	2	0.73	2	0.84	7	3.07	4	1.84	7	3.09	5	1.79	6	2.33	1	0.33	14	4.89	14	4.8	12	3.76
BMK_Unigene_001902	296	7.15	121	3	62	1.79	24	0.7	366	12.28	73	2.14	294	7.4	283	8.18	232	5	142	3.51	181	4.4	275	6.18
BMK_Unigene_001909	20	6.79	2	0.7	2	0.8	0	0	28	12.27	3	1.26	51	17.37	27	10.09	6	1.88	16	5.32	21	6.85	2	0.6
BMK_Unigene_001912	0	0	0	0	0	0	12	3.41	0	0	0	0	0	0	1	0.26	0	0	12	2.78	0	0	0	0
BMK_Unigene_001913	0	0	3	0.8	0	0	0	0	2	0.68	6	1.9	0	0	0	0	0	0	0	0	0	0	4	0.92
BMK_Unigene_001915	0	0	0	0	0	0	11	4	0	0	1	0.37	0	0	0	0	2	0.55	0	0	0	0	0	0
BMK_Unigene_001921	160	2.79	300	5.36	55	1.16	48	1.01	278	6.74	67	1.41	386	6.99	323	6.74	143	2.23	145	2.58	340	5.95	338	5.49
BMK_Unigene_001923	1	0.21	2	0.44	7	1.78	0	0	6	1.71	0	0	0	0	0	0	2	0.39	0	0	0	0	0	0
BMK_Unigene_001926	0	0	0	0	0	0	5	2.38	0	0	0	0	1	0.39	0	0	5	1.8	2	0.75	4	1.48	0	0
BMK_Unigene_001927	132	3.31	95	2.46	32	0.96	59	1.81	98	3.4	73	2.24	12	0.32	3	0.09	21	0.48	82	2.11	12	0.31	4	0.09
BMK_Unigene_001928	6	1.39	2	0.47	0	0	0	0	9	2.75	0	0	2	0.47	0	0	0	0	2	0.46	0	0	8	1.66
BMK_Unigene_001932	431	10.54	161	4.05	214	6.27	217	6.39	174	5.91	333	9.86	5	0.14	0	0	18	0.4	48	1.21	11	0.27	8	0.18
BMK_Unigene_001933	1	0.17	0	0	4	0.79	15	3.04	2	0.45	7	1.42	3	0.51	0	0	0	0	1	0.17	0	0	0	0
BMK_Unigene_001935	3	0.33	5	0.56	0	0	0	0	1	0.15	16	2.13	0	0	0	0	0	0	0	0	0	0	0	0
BMK_Unigene_001937	6	0.99	0	0	14	2.75	3	0.6	0	0	0	0	0	0	0	0	0	0	4	0.66	0	0	7	1.05
BMK_Unigene_001941	0	0	3	0.72	0	0	0	0	2	0.62	0	0	15	3.57	1	0.26	4	0.86	6	1.4	1	0.23	5	1.05
BMK_Unigene_001942	0	0	0	0	4	1.38	7	2.5	0	0	3	1.08	3	0.88	10	3.22	8	2.15	0	0	12	3.38	15	3.87
BMK_Unigene_001946	6	0.42	35	2.54	0	0	0	0	15	1.45	17	1.46	19	1.39	49	4.08	6	0.38	2	0.14	3	0.21	13	0.85
BMK_Unigene_001951	193	2.38	416	5.24	117	1.73	69	1.03	825	14.09	125	1.87	116	1.49	101	1.49	71	0.77	173	2.19	114	1.41	106	1.22
BMK_Unigene_001957	1	0.08	6	0.49	0	0	0	0	0	0	4	0.39	173	14.37	175	16.52	4	0.29	10	0.82	32	2.56	1	0.07
BMK_Unigene_001958	0	0	3	1.07	0	0	0	0	0	0	2	0.86	0	0	0	0	0	0	7	2.38	0	0	0	0
BMK_Unigene_001961	0	0	0	0	0	0	0	0	0	0	2	0.34	0	0	4	0.64	12	1.51	33	4.62	6	0.82	3	0.38
BMK_Unigene_001963	0	0	63	2.09	0	0	6	0.23	0	0	0	0	2	0.07	0	0	7	0.2	1	0.03	1	0.03	0	0
BMK_Unigene_001966	11	1.33	0	0	0	0	0	0	0	0	0	0	10	1.24	15	2.1	0	0	27	3.29	0	0	6	0.66
BMK_Unigene_001967	102	2.94	7	0.21	33	1.15	27	0.96	7	0.28	15	0.53	50	1.49	18	0.61	60	1.53	46	1.37	57	1.64	49	1.3
BMK_Unigene_001968	115	2.41	139	3	96	2.4	74	1.88	83	2.42	95	2.4	584	12.71	376	9.4	432	8.05	719	15.39	385	8.09	753	14.66
BMK_Unigene_001972	7	1.54	1	0.23	0	0	0	0	0	0	0	0	23	5.13	25	6.19	8	1.6	17	3.85	42	9	19	3.74
BMK_Unigene_001973	0	0	3	1.07	2	0.82	0	0	1	0.45	6	2.57	0	0	0	0	1	0.32	0	0	0	0	0	0
BMK_Unigene_001976	0	0	0	0	0	0	0	0	14	3.58	0	0	0	0	0	0	0	0	0	0	0	0	4	0.69
BMK_Unigene_001977	744	25.94	1272	45.44	512	21.3	149	6.25	486	23.4	349	14.7	841	30.43	1520	62.99	717	22.23	444	15.81	1058	36.93	516	16.68
BMK_Unigene_001978	0	0	0	0	0	0	0	0	2	0.73	0	0	0	0	0	0	0	0	0	0	7	1.89	0	0
BMK_Unigene_001979	0	0	0	0	2	0.53	0	0	0	0	0	0	1	0.23	5	1.27	4	0.82	8	1.79	3	0.66	0	0
BMK_Unigene_001980	0	0	0	0	0	0	0	0	3	1.31	0	0	0	0	0	0	3	0.94	0	0	0	0	6	1.79
BMK_Unigene_001984	60	2.74	74	3.46	25	1.36	16	0.88	28	1.76	7	0.39	8	0.38	4	0.22	9	0.37	21	0.98	8	0.36	16	0.68
BMK_Unigene_001987	21	1.44	42	2.96	0	0	8	0.66	43	4.05	12	1	0	0	0	0	0	0	0	0	3	0.21	4	0.25
BMK_Unigene_001992	2	0.36	3	0.55	0	0	0	0	0	0	0	0	5	0.92	2	0.41	8	1.31	16	2.88	2	0.35	8	1.3
BMK_Unigene_002000	5	1.58	0	0	5	1.87	0	0	5	2.05	0	0	0	0	0	0	3	0.87	0	0	0	0	0	0
BMK_Unigene_002003	0	0	0	0	1	0.24	0	0	1	0.27	2	0.49	9	1.83	15	3.39	7	1.27	12	2.39	2	0.39	10	1.79
BMK_Unigene_002004	0	0	1	0.33	0	0	0	0	6	2.5	6	2.37	0	0	0	0	1	0.3	1	0.32	0	0	2	0.57
BMK_Unigene_002008	39	0.63	14	0.23	68	1.31	38	0.73	0	0	123	2.4	42	0.71	27	0.53	11	0.17	74	1.22	50	0.81	30	0.45
BMK_Unigene_002009	11	0.6	17	0.95	22	1.43	26	1.71	23	1.73	24	1.59	18	1.02	20	1.29	20	0.97	52	2.89	34	1.85	21	1.11
BMK_Unigene_002012	0	0	0	0	0	0	0	0	0	0	2	0.62	0	0	0	0	5	1.16	9	2.27	0	0	0	0
BMK_Unigene_002013	3	0.71	18	4.4	0	0	3	0.87	4	1.25	0	0	7	1.69	0	0	0	0	1	0.24	1	0.23	5	1.06
BMK_Unigene_002015	4	0.48	0	0	2	0.29	3	0.44	11	1.8	0	0	0	0	1	0.14	0	0	2	0.24	0	0	0	0
BMK_Unigene_002018	6	0.18	6	0.19	1	0.04	7	0.26	30	1.29	0	0	88	2.8	119	4.36	170	4.62	114	3.56	166	5.1	380	10.79
BMK_Unigene_002020	0	0	0	0	0	0	8	2.73	0	0	0	0	0	0	0	0	4	1.03	2	0.55	0	0	0	0
BMK_Unigene_002023	0	0	0	0	0	0	0	0	0	0	10	2.68	0	0	2	0.49	0	0	0	0	0	0	0	0
BMK_Unigene_002024	0	0	24	5.81	0	0	0	0	0	0	1	0.29	0	0	0	0	0	0	0	0	0	0	0	0
BMK_Unigene_002027	115	5.46	350	17.04	6	0.34	34	1.95	236	15.45	4	0.23	0	0	0	0	8	0.37	0	0	0	0	6	0.26
BMK_Unigene_002028	156	3.32	117	2.55	51	1.31	45	1.15	146	4.31	37	0.95	247	5.46	124	3.17	264	4.99	205	4.47	315	6.72	293	5.8
BMK_Unigene_002029	32	3.32	23	2.44	5	0.62	0	0	18	2.53	7	0.88	3	0.32	4	0.48	11	1.1	5	0.63	18	1.85	7	0.66
BMK_Unigene_002030	0	0	2	0.56	0	0	0	0	0	0	6	2.01	0	0	0	0	0	0	6	1.62	0	0	3	0.73
BMK_Unigene_002031	3	0.7	8	1.92	0	0	42	11.99	3	0.93	0	0	6	1.43	14	3.68	2	0.43	12	2.79	0	0	2	0.42
BMK_Unigene_002032	11	3.06	2	0.57	4	1.32	0	0	4	1.45	5	1.71	18	5.06	1	0.31	3	1.02	9	2.47	7	1.89	4	0.99
BMK_Unigene_002033	774	14.23	507	9.55	445	9.79	183	4.05	766	19.55	487	10.83	103	1.99	71	1.57	38	0.62	19	0.36	68	1.27	69	1.19
BMK_Unigene_002036	1	0.08	25	2.09	0	0	5	0.48	12	1.3	14	1.35	3	0.25	0	0	2	0.14	0	0	2	0.16	2	0.15
BMK_Unigene_002037	12	3.81	0	0	2	0.75	4	1.56	0	0	0	0	0	0	0	0	2	0.59	1	0.31	0	0	0	0
BMK_Unigene_002038	1	0.07	28	1.93	0	0	0	0	10	0.92	0	0	17	1.18	2	0.16	1	0.06	1	0.07	8	0.54	10	0.62
BMK_Unigene_002040	0	0	4	0.58	0	0	8	1.37	4	0.76	0	0	0	0	11	1.79	3	0.38	9	1.27	0	0	2	0.26
BMK_Unigene_002041	95	8.12	101	8.82	420	42.72	372	38.35	65	7.55	52	5.37	9	0.79	2	0.2	45	3.44	280	24.21	33	2.8	49	3.83
BMK_Unigene_002043	0	0	0	0	5	0.13	144	3.81	0	0	0	0	0	0	0	0	0	0	3	0.07	0	0	0	0
BMK_Unigene_002045	0	0	0	0	0	0	4	0.12	7	0.2	0	0	7484	160.5	10978	270.48	3100	56.78	7753	163.54	4584	94.87	5217	100.05
BMK_Unigene_002047	7	0.26	0	0	0	0	38	1.71	1	0.05	0	0	1	0.04	3	0.13	129	4.28	83	3.16	27	1.01	79	2.73
BMK_Unigene_002051	273	4.06	280	4.27	118	2.1	141	2.52	571	11.8	111	2	329	5.09	555	9.86	153	2.02	412	6.27	261	3.9	132	1.83
BMK_Unigene_002055	0	0	0	0	0	0	0	0	0	0	0	0	0	0	0	0	11	1.89	10	1.88	2	0.37	0	0
BMK_Unigene_002058	187	22.85	48	6.01	177	25.73	30	4.44	52	8.59	28	4.16	7	0.89	2	0.28	0	0	0	0	0	0	4	0.45
BMK_Unigene_002059	11	2.34	0	0	0	0	0	0	0	0	0	0	5	1.08	0	0	0	0	3	0.63	4	0.83	4	0.76
BMK_Unigene_002060	54	17.1	87	28.07	21	7.73	15	5.72	5	2.02	38	14.62	47	14.72	29	9.93	4	1.15	7	2.14	11	3.3	9	2.47
BMK_Unigene_002061	0	0	16	4.12	0	0	0	0	2	0.66	0	0	0	0	0	0	0	0	0	0	0	0	0	0
BMK_Unigene_002062	97	2.14	109	2.47	24	0.63	6	0.16	111	3.39	39	1.06	149	3.4	284	7.46	201	3.92	73	1.65	106	2.34	216	4.41
BMK_Unigene_002066	0	0	9	2.38	0	0	3	0.94	1	0.34	0	0	0	0	0	0	2	0.47	0	0	1	0.25	0	0
BMK_Unigene_002067	0	0	0	0	0	0	4	0.23	1	0.07	15	0.86	43	2.11	7	0.39	5	0.21	15	0.72	23	1.09	8	0.35
BMK_Unigene_002068	2815	10.39	3410	12.89	1357	5.99	1269	5.63	2581	13.27	1352	6.02	4973	19.11	7981	35.34	8297	27.11	4451	16.83	7061	26.19	4327	14.89
BMK_Unigene_002073	6	0.37	19	1.21	23	1.71	3	0.23	6	0.51	20	1.51	41	2.66	317	23.32	22	1.22	13	0.84	65	4.1	29	1.67
BMK_Unigene_002074	2	0.47	0	0	0	0	0	0	0	0	0	0	1	0.24	1	0.26	1	0.21	2	0.47	7	1.6	11	2.31
BMK_Unigene_002077	8	0.32	17	0.7	1	0.05	75	3.63	4	0.22	1	0.05	0	0	1	0.05	4	0.14	66	2.7	0	0	2	0.07
BMK_Unigene_002078	3	0.49	27	4.48	3	0.58	7	1.37	10	2.17	0	0	3	0.5	0	0	0	0	0	0	0	0	0	0
BMK_Unigene_002079	3	0.17	0	0	0	0	0	0	5	0.4	0	0	22	1.38	24	1.67	49	2.54	7	0.41	32	1.88	51	2.74
BMK_Unigene_002080	14	0.62	16	0.72	9	0.47	46	2.45	27	1.65	8	0.43	61	2.83	36	1.94	25	0.98	64	2.89	23	1.06	50	2.08
BMK_Unigene_002083	83	2.52	27	0.86	134	4.85	124	4.53	19	0.83	107	3.91	20	0.63	32	1.16	90	2.43	27	0.85	34	1.03	17	0.48
BMK_Unigene_002084	1937	118.19	2025	126.62	1264	92	1566	115.3	2056	172.24	1839	135.96	331	20.96	577	41.6	489	26.7	1109	68.81	597	36.34	599	33.75
BMK_Unigene_002099	0	0	3	0.19	0	0	0	0	5	0.42	0	0	86	5.48	38	2.76	6	0.33	4	0.25	9	0.55	2	0.11
BMK_Unigene_002101	0	0	0	0	1	0.13	0	0	1	0.14	0	0	0	0	3	0.37	3	0.29	1	0.11	2	0.21	24	2.32
BMK_Unigene_002102	0	0	0	0	3	0.26	1	0.09	3	0.3	0	0	0	0	11	0.94	39	2.6	3	0.22	5	0.36	9	0.6
BMK_Unigene_002105	1	0.11	0	0	0	0	0	0	8	1.24	0	0	4	0.47	17	2.27	0	0	0	0	0	0	1	0.1
BMK_Unigene_002106	373	9.39	450	11.59	310	9.31	489	14.78	282	9.82	392	11.9	291	7.6	247	7.4	368	8.22	328	8.43	319	8.04	364	8.49
BMK_Unigene_002108	2075	18.73	1696	15.68	799	8.63	348	3.78	1516	19.05	617	6.73	517	4.86	1118	12.1	119	0.96	473	4.38	568	5.15	884	7.44
BMK_Unigene_002109	695	7.1	720	7.55	1118	13.67	1761	21.64	248	3.54	749	9.25	726	7.73	716	8.78	1641	14.87	2759	28.89	1552	15.94	1168	11.12
BMK_Unigene_002114	0	0	3	0.13	2	0.1	6	0.3	13	0.77	0	0	32	1.36	51	2.48	907	33.13	345	14.46	76	3.15	1239	47.07
BMK_Unigene_002120	1	0.31	0	0	0	0	0	0	24	9.56	0	0	0	0	0	0	0	0	0	0	0	0	0	0
BMK_Unigene_002124	20	1.27	45	2.93	17	1.29	14	1.07	40	3.48	5	0.38	2	0.13	2	0.15	5	0.28	9	0.61	5	0.32	6	0.35
BMK_Unigene_002125	37	6.22	18	3.03	10	2.11	12	2.39	22	4.83	3	0.6	88	14.85	51	9.58	1	0.15	14	2.3	20	3.38	8	1.19
BMK_Unigene_002126	133	9.3	132	9.46	128	10.68	74	6.25	100	9.58	142	12.04	104	7.58	157	12.93	450	28.22	182	12.93	348	24.3	180	11.6
BMK_Unigene_002128	0	0	0	0	0	0	0	0	4	1.92	0	0	2	0.75	0	0	11	3.83	0	0	0	0	0	0
BMK_Unigene_002130	108	2.25	124	2.65	40	1	95	2.4	132	3.82	66	1.66	124	2.68	74	1.84	364	6.73	274	5.84	187	3.9	217	4.2
BMK_Unigene_002133	6	1.54	5	1.32	7	2.13	0	0	0	0	0	0	0	0	0	0	0	0	2	0.51	0	0	0	0
BMK_Unigene_002137	0	0	5	1.76	0	0	0	0	0	0	0	0	6	2.07	0	0	0	0	2	0.67	3	0.99	0	0
BMK_Unigene_002138	8	2.07	1	0.27	0	0	0	0	6	2.04	0	0	0	0	0	0	0	0	0	0	0	0	0	0
BMK_Unigene_002139	453	27.92	366	23.08	216	15.87	179	13.35	358	30.29	228	17.07	581	37	431	31.29	751	41.27	234	14.64	550	33.75	457	25.94
BMK_Unigene_002140	264	6.07	192	4.52	202	5.55	121	3.35	864	27.55	620	17.22	527	12.59	659	18.1	170	3.47	705	16.56	1405	32.38	1669	35.66
BMK_Unigene_002141	66	6.14	57	5.45	21	2.3	3	0.33	79	10.03	36	4.03	6	0.57	2	0.22	3	0.31	0	0	6	0.57	0	0
BMK_Unigene_002142	0	0	0	0	31	6.05	27	5.39	0	0	0	0	0	0	0	0	0	0	7	1.15	0	0	1	0.15
BMK_Unigene_002145	260	4.96	237	4.64	300	6.86	203	4.67	223	5.93	152	3.51	445	8.83	451	10.29	563	9.54	343	6.7	836	16.02	658	11.7
BMK_Unigene_002148	1	0.1	7	0.73	0	0	0	0	34	4.69	0	0	23	2.41	26	3.08	0	0	0	0	0	0	0	0
BMK_Unigene_002151	12765	226.49	3529	64.18	17237	365.59	6665	142.24	1790	44.12	8511	182.47	4030	74.35	5249	111.33	9369	147.53	7488	135.91	12107	215.57	4431	73.12
BMK_Unigene_002154	239	5.7	218	5.33	27	0.77	107	3.09	358	11.83	35	1.01	33	0.82	48	1.36	81	1.71	64	1.56	54	1.29	63	1.39
BMK_Unigene_002156	5	0.38	1	0.08	0	0	0	0	49	5.04	0	0	0	0	5	0.44	0	0	0	0	0	0	0	0
BMK_Unigene_002158	30	3.69	0	0	0	0	0	0	3	0.5	1	0.15	2	0.25	0	0	2	0.22	0	0	0	0	0	0
BMK_Unigene_002162	9	2.11	6	1.44	0	0	0	0	2	0.62	0	0	3	0.71	0	0	0	0	0	0	1	0.23	6	1.26
BMK_Unigene_002163	38	1.94	78	4.09	39	2.38	15	0.97	60	4.23	32	1.98	121	6.41	102	6.18	210	9.59	133	6.96	33	1.7	158	7.5
BMK_Unigene_002164	0	0	0	0	0	0	0	0	0	0	2	0.46	13	2.51	0	0	0	0	0	0	1	0.19	0	0
BMK_Unigene_002165	0	0	0	0	0	0	0	0	5	2.29	0	0	0	0	0	0	2	0.66	0	0	0	0	0	0
BMK_Unigene_002166	0	0	0	0	0	0	0	0	4	1.23	0	0	0	0	0	0	3	0.64	3	0.69	10	2.26	0	0
BMK_Unigene_002173	0	0	9	0.35	3	0.18	2	0.13	1	0.06	2	0.09	165	6.35	172	7.56	286	9.4	240	9.05	187	6.93	168	5.77
BMK_Unigene_002177	1	0.14	3	0.44	0	0	0	0	14	2.7	0	0	0	0	0	0	3	0.39	0	0	0	0	1	0.13
BMK_Unigene_002178	1	0.16	19	3.03	1	0.18	1	0.19	4	0.85	0	0	0	0	0	0	1	0.14	0	0	0	0	7	0.99
BMK_Unigene_002179	0	0	2	0.11	0	0	1	0.07	0	0	0	0	10	0.56	6	0.39	16	0.78	37	2.05	4	0.22	5	0.25
BMK_Unigene_002180	7	0.64	6	0.56	5	0.54	8	0.88	14	1.87	0	0	10	0.94	5	0.53	11	0.9	1	0.09	4	0.36	5	0.42
BMK_Unigene_002181	907	21.13	655	15.65	2351	65.41	432	12.11	493	15.93	1021	28.76	802	19.41	548	15.25	689	14.25	533	12.69	620	14.49	671	14.53
BMK_Unigene_002184	119	3.42	115	3.37	99	3.38	90	3.1	134	5.33	95	3.31	217	6.45	216	7.38	204	5.19	250	7.31	225	6.44	270	7.16
BMK_Unigene_002188	7	2.44	0	0	0	0	0	0	0	0	0	0	1	0.35	0	0	0	0	6	2.05	0	0	0	0
BMK_Unigene_002189	2	0.19	1	0.1	0	0	0	0	16	2.24	0	0	0	0	0	0	11	0.96	8	0.79	3	0.29	6	0.53
BMK_Unigene_002191	0	0	0	0	2	0.31	0	0	1	0.18	0	0	55	7.45	46	7.01	8	0.95	7	0.93	2	0.26	38	4.56
BMK_Unigene_002192	9	2.97	0	0	0	0	0	0	0	0	0	0	0	0	7	2.53	0	0	1	0.32	2	0.64	0	0
BMK_Unigene_002194	12	2.13	9	1.64	4	0.84	4	0.86	17	4.04	4	0.87	3	0.55	5	1.01	7	1.13	3	0.53	0	0	0	0
BMK_Unigene_002205	78	5.72	80	6.01	92	8.06	63	5.56	59	5.98	81	7.22	166	12.58	128	11	81	5.29	235	17.4	131	9.56	89	5.97
BMK_Unigene_002207	214	4.79	171	3.93	229	6.13	46	1.25	167	5.19	267	7.22	420	9.77	409	10.94	511	10.16	248	5.69	175	3.95	400	8.33
BMK_Unigene_002211	4	1.42	3	1.09	5	2.1	0	0	1	0.46	0	0	5	1.78	4	1.55	2	0.66	1	0.35	2	0.68	0	0
BMK_Unigene_002216	14	1.43	17	1.78	8	0.97	0	0	3	0.42	4	0.5	20	2.11	37	4.41	0	0	0	0	5	0.51	0	0
BMK_Unigene_002221	0	0	1	0.19	0	0	0	0	2	0.5	0	0	0	0	12	2.58	4	0.69	3	0.57	5	0.93	1	0.17
BMK_Unigene_002229	0	0	0	0	0	0	0	0	0	0	0	0	0	0	0	0	4	0.94	0	0	9	2.24	0	0
BMK_Unigene_002231	48	2.6	34	1.89	4	0.26	4	0.26	4	0.3	13	0.85	16	0.9	11	0.7	11	0.53	7	0.39	8	0.43	11	0.55
BMK_Unigene_002232	3	0.94	0	0	2	0.74	0	0	3	1.22	0	0	8	2.52	0	0	0	0	3	0.92	2	0.6	0	0
BMK_Unigene_002233	0	0	0	0	66	14.92	72	16.68	0	0	12	2.79	0	0	0	0	0	0	1	0.19	0	0	6	1.03
BMK_Unigene_002238	1212	32.46	48	1.32	125	4	58	1.87	38	1.41	158	5.12	1	0.03	2	0.06	9	0.21	18	0.49	34	0.91	37	0.92
BMK_Unigene_002240	0	0	3	0.54	0	0	0	0	0	0	0	0	1	0.18	0	0	0	0	0	0	11	1.89	6	0.95
BMK_Unigene_002241	0	0	0	0	0	0	0	0	0	0	0	0	0	0	17	5.9	0	0	0	0	0	0	0	0
BMK_Unigene_002242	0	0	0	0	0	0	0	0	3	1.08	0	0	4	1.11	0	0	0	0	0	0	8	2.14	0	0
BMK_Unigene_002244	111	12.02	128	14.21	25	3.22	13	1.71	105	15.42	18	2.5	11	1.23	31	3.91	24	2.43	11	1.26	12	1.29	36	3.57
BMK_Unigene_002247	0	0	0	0	0	0	13	0.83	0	0	0	0	6	0.36	16	0.93	240	10.54	1317	65.93	7	0.39	92	4.19
BMK_Unigene_002248	0	0	0	0	0	0	0	0	0	0	0	0	2	0.73	1	0.4	0	0	0	0	1	0.35	7	2.24
BMK_Unigene_002252	0	0	0	0	6	2.55	0	0	0	0	4	1.77	0	0	4	1.56	0	0	0	0	0	0	1	0.32
BMK_Unigene_002254	0	0	1	0.21	0	0	0	0	9	2.48	0	0	0	0	0	0	0	0	0	0	3	0.61	7	1.31
BMK_Unigene_002257	8	1.88	7	1.69	3	0.84	0	0	7	2.17	0	0	3	0.72	0	0	0	0	3	0.7	0	0	0	0
BMK_Unigene_002261	1	0.21	0	0	0	0	0	0	10	2.8	0	0	0	0	5	1.2	0	0	0	0	0	0	0	0
BMK_Unigene_002264	0	0	0	0.02	0	0	6	0.19	0	0	2	0.07	71	1.9	71	2.22	53	1.22	55	1.47	57	1.5	43	1.04
BMK_Unigene_002265	2	0.49	0	0	0	0	0	0	0	0	0	0	0	0	0	0	8	1.78	0	0	0	0	0	0
BMK_Unigene_002269	2	0.39	9	1.82	4	0.94	0	0	3	0.79	1	0.24	5	1.01	6	1.34	4	0.72	2	0.39	0	0	1	0.18
BMK_Unigene_002272	7	2.26	3	0.99	4	1.53	11	4.35	3	1.26	5	1.99	7	2.27	0	0	3	0.89	3	0.95	4	1.24	1	0.28
BMK_Unigene_002273	6670	86.29	12021	159.39	1692	26.17	1983	30.86	19945	358.85	5083	79.44	3934	52.96	2694	41.72	4267	48.97	6808	90.17	5974	77.62	7051	84.92
BMK_Unigene_002275	0	0	0	0	0	0	1	0.34	0	0	0	0	0	0	6	1.87	0	0	0	0	0	0	3	0.75
BMK_Unigene_002276	42	2.22	45	2.44	15	0.95	6	0.38	37	2.69	4	0.26	0	0	0	0	6	0.28	0	0	0	0	0	0
BMK_Unigene_002277	116	3.93	63	2.18	35	1.44	74	3.02	33	1.57	56	2.29	599	20.92	601	24.07	266	7.96	198	6.79	931	31.35	453	14.15
BMK_Unigene_002278	4646	79.49	3534	61.97	4028	82.4	4713	97	1966	46.74	4718	97.55	7511	133.64	9167	187.53	6871	104.32	7814	136.78	8745	150.18	6689	106.45
BMK_Unigene_002279	0	0	1	0.24	0	0	0	0	8	2.44	0	0	0	0	0	0	0	0	0	0	0	0	0	0
BMK_Unigene_002281	22	1.88	3	0.26	2	0.2	0	0	3	0.35	2	0.21	0	0	0	0	4	0.31	0	0	0	0	6	0.47
BMK_Unigene_002283	2	0.46	10	2.36	0	0	0	0	0	0	0	0	1	0.23	0	0	1	0.21	0	0	6	1.34	0	0
BMK_Unigene_002284	0	0	2	0.27	0	0	0	0	0	0	0	0	0	0	0	0	82	9.58	0	0	0	0	0	0
BMK_Unigene_002286	9	1.85	3	0.63	0	0	0	0	5	1.36	1	0.25	8	1.68	3	0.7	0	0	3	0.62	3	0.6	3	0.55
BMK_Unigene_002292	73	1.41	104	2.06	26	0.6	13	0.3	187	5	10	0.23	47	0.94	39	0.9	29	0.51	1	0.02	13	0.25	24	0.43
BMK_Unigene_002297	2	0.55	0	0	0	0	6	2.02	8	2.88	1	0.34	0	0	0	0	0	0	2	0.54	0	0	1	0.24
BMK_Unigene_002299	9	0.16	70	1.29	5	0.11	10	0.23	60	1.5	3	0.07	324	6.01	307	6.56	146	2.31	217	3.96	274	4.91	328	5.44
BMK_Unigene_002307	5	1.01	11	2.28	4	0.96	0	0	0	0	2	0.49	8	1.65	0	0	4	0.74	3	0.6	0	0	0	0
BMK_Unigene_002310	283	8.5	229	7.06	198	7.13	351	12.68	154	6.41	217	7.87	486	15.17	360	12.89	747	19.95	656	20.12	636	19.12	560	15.59
BMK_Unigene_002312	60	2.22	229	8.69	14	0.62	4	0.18	37	1.89	53	2.38	8	0.31	2	0.09	79	2.61	1	0.04	0	0	32	1.1
BMK_Unigene_002313	294	3.55	313	3.88	288	4.16	209	3.03	174	2.93	128	1.87	1455	18.28	1483	21.44	4211	45.08	8273	102.26	5276	63.97	6487	72.91
BMK_Unigene_002315	0	0	11	1.99	7	1.47	0	0	0	0	6	1.29	0	0	0	0	1	0.16	1	0.18	0	0	6	0.96
BMK_Unigene_002319	153	3.18	193	4.11	78	1.95	43	1.1	270	7.79	133	3.34	55	1.19	23	0.59	22	0.42	22	0.48	10	0.21	10	0.21
BMK_Unigene_002323	0	0	5	0.62	0	0	0	0	11	1.81	0	0	0	0	0	0	2	0.22	2	0.24	0	0	0	0
BMK_Unigene_002324	721	13.72	1086	21.19	2166	49.28	3487	79.82	776	20.5	3963	91.12	827	16.36	354	8.06	798	13.49	1420	27.64	1183	22.6	2051	36.3
BMK_Unigene_002325	0	0	8	0.47	0	0	0	0	0	0	6	0.41	0	0	0	0	52	2.65	8	0.46	0	0	137	7.22
BMK_Unigene_002326	571	27.55	446	22.06	469	27.03	335	19.48	443	29.45	537	31.37	68	3.42	33	1.9	79	3.41	56	2.78	39	1.89	71	3.18
BMK_Unigene_002327	0	0	0	0	0	0	3	0.54	0	0	0	0	1	0.15	4	0.68	4	0.53	23	3.41	2	0.29	2	0.27
BMK_Unigene_002328	1951	53.69	2252	63.49	4581	150.58	4307	142.6	1143	43.58	4320	143.7	751	21.49	334	10.96	836	20.44	573	16.11	724	19.97	797	20.38
BMK_Unigene_002330	37	2.77	23	1.75	24	2.2	9	0.8	81	8.27	38	3.41	169	12.95	28	2.44	8	0.54	23	1.72	86	6.38	61	4.19
BMK_Unigene_002331	35	1	9	0.27	1	0.06	1	0.04	1	0.04	16	0.58	59	1.76	112	3.84	46	1.18	56	1.64	48	1.38	99	2.64
BMK_Unigene_002333	38	0.52	39	0.55	18	0.3	20	0.33	79	1.49	9	0.16	145	2.04	164	2.66	270	3.23	170	2.35	151	2.04	307	3.85
BMK_Unigene_002336	0	0	0	0	0	0	0	0	4	1.84	2	0.88	0	0	0	0	0	0	0	0	0	0	2	0.63
BMK_Unigene_002339	334	10.3	322	10.2	501	18.47	190	7.05	310	13.25	231	8.62	122	3.92	96	3.55	23	0.65	54	1.72	93	2.88	60	1.74
BMK_Unigene_002342	132	2.22	83	1.44	96	1.93	34	0.7	105	2.45	72	1.46	235	4.09	208	4.18	582	8.66	381	6.54	286	4.82	338	5.27
BMK_Unigene_002344	9	1.92	3	0.66	0	0	1	0.26	4	1.13	4	1.04	0	0	4	0.96	0	0	2	0.42	0	0	0	0
BMK_Unigene_002346	0	0	0	0	0	0	0	0	4	1.84	0	0	0	0	0	0	0	0	0	0	0	0	4	1.25
BMK_Unigene_002352	3	0.14	7	0.33	0	0	7	0.36	0	0	0	0	543	24.1	333	16.92	339	12.95	36	1.61	259	11.08	513	20.3
BMK_Unigene_002353	0	0	0	0	0	0	6	0.26	0	0	4	0.18	246	7.93	392	14.45	464	12.79	480	15.2	343	10.65	501	14.41
BMK_Unigene_002356	0	0	0	0	0	0	0	0	5	2.28	0	0	0	0	0	0	0	0	0	0	0	0	0	0
BMK_Unigene_002357	113	4.35	60	2.37	86	3.99	112	5.23	73	3.91	80	3.76	280	11.22	527	24.15	73	2.5	70	2.75	82	3.16	84	3.01
BMK_Unigene_002360	418	9.79	328	7.88	224	6.27	356	10.01	205	6.65	288	8.15	270	6.58	304	8.5	452	9.39	251	6.01	272	6.38	391	8.5
BMK_Unigene_002361	16	3.31	0	0	13	3.19	0	0	0	0	5	1.27	12	2.53	3	0.7	0	0	0	0	0	0	0	0
BMK_Unigene_002362	582	12.45	1072	23.48	169	4.32	88	2.28	956	28.35	272	7.04	160	3.57	156	4	144	2.75	77	1.69	150	3.22	181	3.61
BMK_Unigene_002365	0	0	2	0.15	0	0	1	0.12	3	0.26	1	0.12	279	17.38	102	7.24	304	16.32	105	6.48	174	10.44	146	8.1
BMK_Unigene_002367	0	0	66	3.95	0	0	2	0.14	46	3.69	4	0.28	3	0.18	1	0.07	1	0.05	0	0	0	0	0	0
BMK_Unigene_002371	38	1.17	66	2.08	16	0.59	73	2.72	104	4.43	79	2.92	681	21.6	659	23.99	706	19.18	600	18.7	897	27.44	633	17.96
BMK_Unigene_002378	455	13.84	379	11.8	126	4.59	87	3.18	912	38.37	200	7.37	0	0	1	0.06	4	0.11	29	0.91	1	0.03	1	0.03
BMK_Unigene_002379	1000	16.87	1036	17.89	565	11.39	656	13.29	1035	24.23	803	16.35	1007	17.65	1275	25.69	1235	18.47	1408	24.29	1179	19.94	1117	17.52
BMK_Unigene_002380	74	1.73	127	3.02	45	1.25	23	0.64	108	3.48	53	1.49	12	0.3	0	0	16	0.34	15	0.36	20	0.49	1	0.03
BMK_Unigene_002385	901	39.54	1269	57.1	558	29.24	371	19.65	1076	65.18	637	33.85	185	8.43	100	5.22	70	2.74	0	0	7	0.34	162	6.59
BMK_Unigene_002388	19	0.77	7	0.29	5	0.24	0	0	0	0	0	0	31	1.3	15	0.72	105	3.78	72	2.97	28	1.13	52	1.95
BMK_Unigene_002394	231	2.03	283	2.54	150	1.57	258	2.72	195	2.38	204	2.16	2644	24.05	2408	25.22	4404	34.11	4571	40.91	6124	53.77	3384	27.55
BMK_Unigene_002399	0	0	0	0	0	0	0	0	3	1.51	0	0	0	0	0	0	0	0	6	2.31	0	0	0	0
BMK_Unigene_002400	106	3.15	105	3.22	72	2.58	56	2	116	4.76	37	1.33	179	5.53	253	8.93	255	6.73	407	12.34	188	5.58	337	9.29
BMK_Unigene_002401	554	14.2	1269	33.34	1043	31.94	519	16.02	198	7.06	902	27.95	1073	28.57	703	21.51	1468	33.43	785	20.56	967	24.85	1164	27.7
BMK_Unigene_002407	1	0.11	1	0.11	0	0	8	1.04	1	0.15	0	0	49	5.45	2	0.25	1	0.1	14	1.53	39	4.17	32	3.26
BMK_Unigene_002410	0	0	2	0.63	0	0	0	0	2	0.79	5	1.88	0	0	0	0	2	0.56	0	0	0	0	0	0
BMK_Unigene_002412	32	1.57	0	0	6	0.35	9	0.53	64	4.32	6	0.36	0	0	1	0.06	0	0	0	0	0	0	5	0.23
BMK_Unigene_002413	1	0.1	0	0	0	0	15	1.9	9	1.28	15	1.91	0	0	3	0.37	0	0	4	0.42	0	0	2	0.19
BMK_Unigene_002415	0	0	7	2	0	0	0	0	4	1.45	0	0	3	0.84	3	0.93	0	0	0	0	0	0	0	0
BMK_Unigene_002416	0	0	2	0.78	0	0	0	0	0	0	0	0	0	0	0	0	0	0	5	1.85	0	0	2	0.66
BMK_Unigene_002417	38	1.46	46	1.81	3	0.14	2	0.09	127	6.76	0	0	2	0.08	4	0.2	6	0.21	1	0.04	1	0.04	1	0.04
BMK_Unigene_002425	0	0	0	0	0	0	0	0	7	3.22	0	0	3	1.07	0	0	0	0	0	0	0	0	0	0
BMK_Unigene_002428	42	1.08	67	1.77	14	0.43	27	0.84	170	6.08	26	0.81	1291	34.62	215	6.62	775	17.77	187	4.93	850	21.99	1631	39.09
BMK_Unigene_002429	325	7.95	465	11.65	356	10.42	429	12.63	353	11.99	376	11.12	23	0.58	44	1.29	190	4.14	91	2.28	93	2.28	86	1.97
BMK_Unigene_002430	224	9.38	196	8.41	239	11.94	205	10.33	106	6.13	219	11.09	272	11.8	198	9.83	223	8.31	271	11.56	336	14.06	284	11
BMK_Unigene_002431	2	0.57	3	0.88	2	0.68	0	0	10	3.75	6	2.12	0	0	3	0.95	0	0	0	0	0	0	0	0
BMK_Unigene_002439	12	0.54	19	0.88	6	0.32	13	0.71	7	0.44	4	0.22	48	2.24	25	1.34	176	7.08	137	6.34	44	1.98	42	1.75
BMK_Unigene_002440	159	9.3	112	6.72	43	3	44	3.11	88	7.07	37	2.62	22	1.33	20	1.38	6	0.31	42	2.5	11	0.69	43	2.32
BMK_Unigene_002442	9	3.16	1	0.36	0	0	3	1.29	0	0	0	0	0	0	0	0	6	1.95	1	0.34	0	0	0	0
BMK_Unigene_002444	28	0.6	94	2.01	29	0.74	62	1.56	36	1.07	39	1	287	6.25	207	5.16	193	3.59	268	5.73	252	5.28	187	3.63
BMK_Unigene_002446	0	0	0	0	0	0	0	0	0	0	4	1.9	0	0	0	0	11	3.93	0	0	3	1.1	2	0.67
BMK_Unigene_002447	0	0	0	0	1	0.29	0	0	0	0	0	0	0	0	7	1.92	5	1.12	3	0.73	0	0	1	0.22
BMK_Unigene_002450	677	10.82	693	11.34	348	6.66	293	5.64	592	13.16	530	10.24	665	11.05	501	9.58	891	12.64	711	11.63	564	9.05	665	9.89
BMK_Unigene_002451	13	4.41	0	0	0	0	0	0	0	0	0	0	0	0	0	0	0	0	3	1	0	0	0	0
BMK_Unigene_002453	0	0	0	0	2	0.44	0	0	0	0	0	0	4	0.77	0	0	0	0	3	0.56	12	2.21	8	1.35
BMK_Unigene_002456	0	0	2	0.65	0	0	0	0	0	0	0	0	0	0	1	0.35	0	0	8	2.47	0	0	4	1.11
BMK_Unigene_002459	272	6.84	185	4.77	347	10.43	405	12.27	139	4.85	273	8.3	271	7.09	217	6.51	280	6.28	360	9.26	204	5.15	268	6.27
BMK_Unigene_002460	1273	12.15	1041	10.18	915	10.44	468	5.37	923	12.26	676	7.8	1142	11.34	729	8.33	1088	9.2	657	6.42	1078	10.34	804	7.14
BMK_Unigene_002462	21	2.73	4	0.53	1	0.15	0	0	4	0.7	1	0.16	2	0.27	0	0	2	0.23	0	0	0	0	5	0.59
BMK_Unigene_002463	260	7.89	120	3.73	109	3.95	168	6.15	59	2.48	74	2.72	1	0.03	3	0.11	2	0.05	3	0.09	0	0	5	0.14
BMK_Unigene_002467	200	8.04	350	14.38	56	2.7	26	1.25	234	12.99	108	5.27	361	15.02	226	10.76	222	7.93	92	3.8	176	7.05	233	8.67
BMK_Unigene_002468	0	0	0	0	0	0	0	0	1	0.34	0	0	0	0	1	0.29	0	0	11	2.85	5	1.27	2	0.47
BMK_Unigene_002470	2	0.47	0	0	6	1.67	0	0	9	2.79	0	0	15	3.58	9	2.38	1	0.21	6	1.4	5	1.15	3	0.63
BMK_Unigene_002471	13	1.82	14	2.01	6	1	0	0	9	1.7	1	0.17	0	0	1	0.16	2	0.25	0	0	0	0	2	0.25
BMK_Unigene_002476	0	0	10	2.11	0	0	8	2	0	0	7	1.76	0	0	0	0	3	0.56	0	0	0	0	13	2.4
BMK_Unigene_002479	223	6.79	220	6.88	29	1.05	10	0.37	457	19.24	13	0.48	85	2.71	157	5.71	28	0.76	2	0.06	5	0.15	18	0.53
BMK_Unigene_002481	0	0	4	1.09	4	1.25	0	0	3	1.04	0	0	4	1.07	0	0	1	0.24	1	0.26	0	0	8	1.88
BMK_Unigene_002484	0	0	0	0	0	0	0	0	5	1.93	0	0	3	0.89	3	0.98	0	0	0	0	0	0	4	1.05
BMK_Unigene_002489	5	1.84	0	0	5	2.17	0	0	2	0.95	4	1.82	1	0.37	0	0	0	0	0	0	5	1.76	5	1.61
BMK_Unigene_002494	0	0	8	2.05	0	0	0	0	2	0.66	0	0	0	0	0	0	0	0	0	0	0	0	3	0.67
BMK_Unigene_002495	181	4.92	148	4.13	33	1.07	9	0.29	70	2.64	46	1.51	1	0.03	0	0	0	0	9	0.25	0	0	0	0
BMK_Unigene_002496	3306	34.65	3769	40.48	2018	25.3	2836	35.74	2852	41.59	3663	46.37	326	3.56	313	3.93	767	7.13	603	6.48	460	4.84	530	5.18
BMK_Unigene_002497	0	0	5	1.9	0	0	1	0.45	3	1.43	0	0	0	0	2	0.8	0	0	0	0	0	0	0	0
BMK_Unigene_002504	0	0	3	0.54	3	0.63	0	0	8	1.89	2	0.43	2	0.36	1	0.2	1	0.16	0	0	5	0.87	1	0.16
BMK_Unigene_002510	0	0	3	0.99	3	1.14	0	0	10	4.18	3	1.19	4	1.3	0	0	0	0	0	0	0	0	0	0
BMK_Unigene_002512	5	0.2	2	0.08	0	0	6	0.29	0	0	1	0.05	0	0	0	0	83	2.99	74	3.05	36	1.46	13	0.49
BMK_Unigene_002513	15	3.72	1	0.25	7	2.06	0	0	10	3.26	12	3.65	0	0	4	1.11	2	0.45	0	0	0	0	1	0.22
BMK_Unigene_002516	0	0	0	0	0	0	2	0.18	6	0.6	29	2.56	0	0	1	0.09	0	0	1	0.07	0	0	0	0
BMK_Unigene_002522	586	14.03	986	24.18	237	6.77	304	8.75	2156	71.48	485	14.02	520	12.94	617	17.61	316	6.73	362	8.85	408	9.8	625	13.9
BMK_Unigene_002524	0	0	8	1.27	0	0	0	0	13	2.7	0	0	0	0	0	0	1	0.14	1	0.16	0	0	2	0.28
BMK_Unigene_002526	0	0	0	0	0	0	3	1.36	3	1.43	1	0.46	3	1.11	7	2.81	0	0	2	0.72	6	2.13	9	2.92
BMK_Unigene_002528	0	0	2	0.56	4	1.28	0	0	10	3.54	0	0	0	0	0	0	0	0	4	1.07	0	0	0	0
BMK_Unigene_002530	2908	67.51	2906	69.15	3422	94.96	1664	46.5	384	12.37	2626	73.71	8512	205.39	18387	509.44	2954	60.92	1912	45.38	3167	73.74	1087	23.46
BMK_Unigene_002531	31	1.01	18	0.59	3	0.12	6	0.23	46	2.09	0	0	10	0.33	27	1.03	9	0.26	62	2.04	7	0.23	28	0.84
BMK_Unigene_002539	145	3.41	117	2.8	66	1.85	73	2.05	107	3.49	75	2.15	71	1.75	32	0.89	60	1.25	58	1.39	59	1.39	58	1.28
BMK_Unigene_002540	5	0.1	6	0.13	7	0.17	23	0.58	6	0.17	8	0.2	82	1.77	22	0.55	60	1.11	169	3.6	94	1.98	32	0.62
BMK_Unigene_002544	27	2.31	19	1.67	2	0.2	6	0.62	15	1.75	3	0.31	6	0.53	19	1.9	18	1.38	6	0.52	22	1.88	3	0.24
BMK_Unigene_002549	38	1.05	53	1.5	83	2.74	218	7.27	16	0.64	56	1.88	5	0.14	6	0.2	5	0.12	26	0.73	10	0.28	18	0.46
BMK_Unigene_002550	10	2.33	62	14.84	14	3.87	17	5.11	5	1.54	12	3.43	0	0	0	0	13	2.78	3	0.69	12	2.73	25	5.4
BMK_Unigene_002552	336	6.9	299	6.29	181	4.43	169	4.19	493	14.03	275	6.83	25	0.53	11	0.28	5	0.09	41	0.86	6	0.12	11	0.21
BMK_Unigene_002553	29	1.8	1	0.06	10	0.74	7	0.52	0	0	5	0.37	174	11.12	36	2.67	16	0.88	20	1.25	42	2.59	105	6.01
BMK_Unigene_002554	79	1.9	72	1.77	43	1.24	56	1.62	50	1.68	184	5.3	212	5.25	173	4.94	352	7.45	1078	26.23	484	11.55	252	5.57
BMK_Unigene_002560	11	0.39	4	0.15	0	0	2	0.09	64	3.16	0	0	1	0.04	0	0	6	0.19	2	0.07	0	0	1	0.03
BMK_Unigene_002563	12	1.96	0	0	0	0	0	0	0	0	2	0.4	0	0	0	0	0	0	0	0	0	0	3	0.44
BMK_Unigene_002564	0	0	0	0	7	1.31	177	33.85	0	0	0	0	6	0.96	0	0	61	8.76	15	2.36	3	0.46	18	2.7
BMK_Unigene_002565	191	6.81	228	8.32	149	6.34	174	7.46	135	6.64	120	5.18	267	9.87	151	6.39	682	21.63	441	16.02	330	11.76	315	10.4
BMK_Unigene_002567	91	18.21	129	26.48	83	19.71	105	25.57	88	23.4	143	34.98	99	20.2	94	21.33	237	43.16	182	36.53	187	36.64	154	27.72
BMK_Unigene_002568	9	0.25	18	0.53	0	0	0	0	6	0.23	0	0	584	16.52	495	16.07	1136	27.49	923	25.66	972	26.53	1000	25.26
BMK_Unigene_002569	0	0	0	0	3	1.01	0	0	0	0	1	0.35	0	0	0	0	1	0.26	7	1.97	7	1.94	3	0.76
BMK_Unigene_002570	3	0.11	1	0.04	0	0	0	0	9	0.47	0	0	83	3.32	217	9.86	21	0.71	51	2.02	43	1.64	217	7.69
BMK_Unigene_002572	103	5.25	21	1.09	335	20.31	608	37.25	39	2.77	215	13.22	4	0.25	4	0.27	3	0.14	86	4.5	2	0.15	62	2.94
BMK_Unigene_002578	18	0.33	19	0.35	5	0.11	2	0.04	8	0.2	0	0	77	1.44	76	1.63	89	1.42	87	1.6	99	1.78	56	0.94
BMK_Unigene_002579	28	2.08	34	2.59	15	1.33	2	0.18	43	4.38	9	0.81	0	0	1	0.09	2	0.13	10	0.76	3	0.22	0	0
BMK_Unigene_002580	1	0.4	0	0	0	0	0	0	1	0.51	0	0	0	0	5	2.16	0	0	4	1.57	0	0	1	0.35
BMK_Unigene_002582	0	0	0	0	0	0	6	1.1	0	0	0	0	22	3.39	0	0	2	0.27	4	0.6	4	0.59	0	0
BMK_Unigene_002588	19	0.34	95	1.74	36	0.77	27	0.58	84	2.09	51	1.1	38	0.71	82	1.75	92	1.46	33	0.6	54	0.97	114	1.9
BMK_Unigene_002591	9	2.66	24	7.29	7	2.45	2	0.72	22	8.48	3	1.09	7	2.09	0	0	1	0.27	7	2.04	2	0.57	0	0
BMK_Unigene_002598	9	0.15	1	0.02	21	0.42	63	1.28	4	0.09	8	0.16	30	0.53	80	1.61	432	6.46	1319	22.76	62	1.05	1725	27.06
BMK_Unigene_002599	43	1.18	20	0.59	97	3.2	66	2.19	19	0.74	28	0.95	468	13.39	1320	43.3	670	16.41	571	16.07	681	18.8	1052	26.89
BMK_Unigene_002600	834	26.12	410	13.16	1963	73.39	911	34.35	341	14.79	687	26	905	29.42	1343	50.05	1329	37	2357	75.33	1114	34.93	916	26.62
BMK_Unigene_002601	1137	23.75	1328	28.44	424	10.59	419	10.53	1081	31.34	532	13.45	1066	23.15	1765	44.04	470	8.73	348	7.44	343	7.19	248	4.83
BMK_Unigene_002602	0	0	0	0	0	0	4	1.26	0	0	0	0	0	0	0	0	0	0	9	2.29	0	0	0	0
BMK_Unigene_002606	2981	43.68	3999	60.04	2016	35.32	1682	29.65	1628	33.17	3019	53.44	1070	16.31	533	9.35	1745	22.68	797	11.96	936	13.78	1813	24.72
BMK_Unigene_002610	0	0	11	2.88	2	0.6	0	0	0	0	0	0	2	0.52	0	0	0	0	0	0	0	0	0	0
BMK_Unigene_002612	53	1.83	9	0.31	1561	63.15	729	29.74	21	0.98	195	7.99	11	0.39	12	0.48	718	21.66	1734	59.95	46	1.59	455	14.3
BMK_Unigene_002613	5	1.15	4	0.94	0	0	7	1.96	2	0.61	2	0.56	0	0	0	0	0	0	1	0.23	0	0	0	0
BMK_Unigene_002614	72	14.61	0	0	0	0	0	0	0	0	0	0	1	0.21	0	0	0	0	0	0	0	0	0	0
BMK_Unigene_002616	1088	15.98	1320	19.85	967	16.97	698	12.32	971	19.81	765	13.56	1296	19.78	2142	37.62	1690	22	1625	24.42	1447	21.32	1297	17.72
BMK_Unigene_002617	2	0.66	6	2.03	0	0	1	0.4	0	0	0	0	0	0	0	0	0	0	0	0	3	0.95	0	0
BMK_Unigene_002622	0	0	10	2.36	0	0	0	0	0	0	0	0	0	0	3	0.77	0	0	0	0	0	0	0	0
BMK_Unigene_002624	2	0.07	0	0	0	0	25	1.1	0	0	0	0	0	0	4	0.17	24	0.78	148	5.53	4	0.15	11	0.37
BMK_Unigene_002625	0	0	0	0	0	0	5	0.54	0	0	0	0	0	0	0	0	115	9.14	18	1.62	0	0	614	49.99
BMK_Unigene_002628	264	13.3	514	26.48	63	3.78	31	1.88	235	16.32	75	4.62	76	3.96	106	6.36	9	0.4	63	3.22	2	0.1	54	2.51
BMK_Unigene_002629	20	0.78	0	0	3	0.14	0	0	8	0.43	0	0	43	1.75	254	11.87	33	1.16	3	0.12	1	0.04	46	1.68
BMK_Unigene_002633	1610	59.4	1363	51.55	1145	50.48	1757	78.05	1192	60.78	1658	74	753	28.84	807	35.39	1042	34.22	1285	48.37	808	29.87	648	22.16
BMK_Unigene_002637	0	0	7	1.87	0	0	0	0	0	0	0	0	0	0	0	0	0	0	2	0.51	0	0	0	0
BMK_Unigene_002640	142	3.39	136	3.33	101	2.9	107	3.08	151	5.03	116	3.35	171	4.26	271	7.75	255	5.41	224	5.47	135	3.23	281	6.24
BMK_Unigene_002641	136	12.1	172	15.72	304	32.28	66	7.09	434	52.66	79	8.52	296	27.15	207	21.53	181	14.43	141	12.69	118	10.42	298	24.3
BMK_Unigene_002650	0	0	0	0	1	0.28	8	2.27	0	0	0	0	0	0	0	0	4	0.85	2	0.46	0	0	0	0
BMK_Unigene_002655	15	1.44	23	2.26	3	0.34	5	0.58	4	0.52	2	0.23	8	0.79	0	0	6	0.52	8	0.78	0	0	2	0.18
BMK_Unigene_002662	8	0.25	0	0	0	0	0	0	0	0	7	0.28	60	1.82	39	1.37	60	1.57	34	1.02	83	2.44	89	2.42
BMK_Unigene_002671	26	0.6	1	0.03	1	0.03	1	0.03	60	1.88	5	0.15	223	5.22	190	5.09	312	6.22	316	7.25	287	6.46	400	8.33
BMK_Unigene_002672	643	14.09	762	17.14	427	11.21	424	11.2	367	11.18	508	13.47	531	12.1	367	9.61	630	12.26	307	6.89	607	13.36	626	12.76
BMK_Unigene_002676	17	2.38	0	0	0	0	10	1.7	0	0	0	0	1	0.14	0	0	3	0.38	0	0	10	1.38	10	1.27
BMK_Unigene_002677	696	18.1	628	16.74	601	18.68	559	17.49	687	24.78	693	21.79	596	16.1	575	17.83	723	16.71	494	13.13	863	22.52	631	15.24
BMK_Unigene_002679	0	0	0	0	0	0	5	1.98	0	0	0	0	0	0	0	0	0	0	0	0	0	0	0	0
BMK_Unigene_002685	336	12.36	460	17.32	210	9.23	199	8.8	331	16.79	297	13.19	1	0.04	7	0.31	8	0.26	8	0.3	27	0.99	14	0.48
BMK_Unigene_002686	0	0	4	0.84	0	0	2	0.5	0	0	0	0	0	0	0	0	10	1.87	4	0.82	0	0	0	0
BMK_Unigene_002689	3050	71.31	1634	39.15	1492	41.68	801	22.54	2104	68.22	1061	29.98	5139	124.85	1867	52.09	7575	157.3	2909	69.52	3793	88.93	6157	133.73
BMK_Unigene_002692	0	0	0	0	0	0	6	2.32	0	0	0	0	0	0	0	0	0	0	0	0	0	0	0	0
BMK_Unigene_002696	0	0	0	0	1	0.19	0	0	2	0.43	0	0	0	0	0	0	1	0.14	5	0.8	14	2.2	0	0
BMK_Unigene_002700	9104	227.92	13471	345.57	4198	125.59	2477	74.63	12433	431.44	4158	125.85	12235	318.24	9225	275.44	9863	219.36	3975	101.7	7467	187.41	10824	251.66
BMK_Unigene_002706	427	32.61	133	10.41	161	14.74	145	13.37	203	21.2	113	10.47	97	7.66	145	13.1	73	4.99	64	4.96	104	7.91	136	9.56
BMK_Unigene_002708	7	2.43	4	1.43	0	0	1	0.43	1	0.45	0	0	13	4.52	0	0	0	0	0	0	0	0	0	0
BMK_Unigene_002714	0	0	0	0	0	0	2	0.52	0	0	0	0	0	0	0	0	0	0	0	0	0	0	10	1.93
BMK_Unigene_002716	0	0	0	0	0	0	11	5.16	0	0	0	0	0	0	0	0	0	0	0	0	3	1.1	1	0.33
BMK_Unigene_002721	0	0	0	0	0	0	9	2.87	0	0	0	0	0	0	3	0.87	0	0	0	0	0	0	0	0
BMK_Unigene_002723	14	2.19	0	0	0	0	0	0	0	0	0	0	3	0.48	0	0	0	0	0	0	0	0	0	0
BMK_Unigene_002730	2126	44.95	3265	70.72	1859	46.98	1941	49.36	2176	63.83	4020	102.7	986	21.68	443	11.2	315	5.92	463	10.01	1128	23.92	1100	21.62
BMK_Unigene_002732	1023	25.87	709	18.37	845	25.53	1038	31.58	492	17.24	1221	37.32	538	14.14	465	14.03	716	16.09	472	12.21	715	18.15	651	15.29
BMK_Unigene_002733	726	19.59	706	19.51	483	15.59	588	19.08	485	18.14	542	17.67	423	11.86	345	11.11	466	11.17	415	11.45	335	9.07	379	9.49
BMK_Unigene_002736	0	0	0	0	0	0	0	0	10	2.13	5	0.97	0	0	3	0.55	0	0	0	0	0	0	0	0
BMK_Unigene_002739	0	0	0	0	0	0	0	0	3	1.26	0	0	0	0	6	2.12	0	0	0	0	0	0	0	0
BMK_Unigene_002740	17	1.91	6	0.69	2	0.27	7	0.95	4	0.61	2	0.27	0	0	8	1.04	22	2.22	12	1.38	0	0	8	0.82
BMK_Unigene_002747	44	2.74	17	1.12	36	2.67	14	1.12	20	1.71	45	3.39	242	15.61	190	13.97	132	7.36	95	6.01	99	6.2	102	5.85
BMK_Unigene_002749	71	1.29	23	0.43	42	0.91	23	0.5	31	0.78	20	0.44	519	9.78	427	9.24	1022	16.41	1024	18.95	761	13.83	888	14.95
BMK_Unigene_002752	0	0	1	0.09	2	0.2	0	0	0	0	0	0	0	0	0	0	28	2.09	0	0	0	0	32	2.45
BMK_Unigene_002755	113	1.39	498	6.29	29	0.43	28	0.41	139	2.39	130	1.94	1143	14.65	1552	22.87	77	0.84	86	1.09	211	2.61	202	2.32
BMK_Unigene_002764	9	0.36	4	0.16	5	0.24	4	0.19	8	0.44	18	0.86	3	0.12	1	0.05	218	7.67	0	0	8	0.32	10	0.37
BMK_Unigene_002769	0	0	0	0	0	0	10	2.08	0	0	2	0.42	0	0	0	0	0	0	0	0	0	0	3	0.46
BMK_Unigene_002773	95	3.52	72	2.74	26	1.15	27	1.21	123	6.3	71	3.19	47	1.81	62	2.73	85	2.82	260	9.84	110	4.08	88	3.03
BMK_Unigene_002775	1	0.1	3	0.29	0	0	0	0	4	0.52	0	0	5	0.49	18	2	0	0	0	0	4	0.38	6	0.52
BMK_Unigene_002781	13	0.87	28	1.91	8	0.64	3	0.24	18	1.64	12	0.97	0	0	2	0.16	1	0.06	1	0.07	2	0.13	8	0.49
BMK_Unigene_002782	90	5.83	118	7.75	42	3.24	44	3.48	66	5.8	44	3.42	2	0.13	42	3.24	67	3.87	16	1.04	2	0.13	44	2.6
BMK_Unigene_002791	4	0.24	7	0.43	7	0.5	14	1.02	12	1	23	1.68	17	1.06	15	1.07	20	1.08	39	2.4	21	1.27	31	1.73
BMK_Unigene_002792	52	1.35	45	1.19	70	2.2	35	1.09	96	3.44	81	2.53	17	0.46	22	0.68	7	0.16	9	0.24	66	1.71	27	0.65
BMK_Unigene_002795	0	0	0	0	0	0	4	0.71	0	0	3	0.53	0	0	0	0	8	1.06	0	0	1	0.14	18	2.39
BMK_Unigene_002802	54	1.66	55	1.72	12	0.43	21	0.77	68	2.88	48	1.76	22	0.69	33	1.2	56	1.52	44	1.39	30	0.91	99	2.81
BMK_Unigene_002804	11	0.16	67	0.98	6	0.11	11	0.2	44	0.89	11	0.2	567	8.36	589	10	207	2.61	319	4.63	362	5.16	322	4.25
BMK_Unigene_002808	20	0.41	377	7.71	112	2.67	74	1.77	703	19.45	161	3.87	11	0.25	12	0.29	53	0.94	56	1.16	14	0.28	57	1.06
BMK_Unigene_002810	0	0	9	2.53	0	0	0	0	0	0	0	0	0	0	4	1.22	0	0	0	0	0	0	0	0
BMK_Unigene_002814	2553	43.87	786	13.84	9979	204.96	7808	161.35	875	20.88	5189	107.73	7725	138.02	1123	23.07	32663	498	16743	294.31	21609	372.61	11363	181.6
BMK_Unigene_002817	19	4.4	8	1.9	13	3.57	1	0.28	1	0.31	4	1.13	1	0.24	2	0.52	0	0	10	2.3	2	0.45	1	0.21
BMK_Unigene_002820	0	0	0	0	0	0	6	1.89	0	0	0	0	0	0	0	0	0	0	0	0	0	0	10	2.29
BMK_Unigene_002821	0	0	0	0	0	0	6	1.79	0	0	0	0	0	0	0	0	0	0	0	0	0	0	0	0
BMK_Unigene_002826	0	0	2	0.61	0	0	0	0	7	2.7	1	0.36	0	0	0	0	0	0	0	0	0	0	0	0
BMK_Unigene_002827	10	0.31	20	0.63	17	0.63	0	0	48	2.05	4	0.15	3	0.1	1	0.04	2	0.05	5	0.16	16	0.49	5	0.14
BMK_Unigene_002829	1804	14.17	2341	18.84	792	7.45	693	6.54	1715	18.77	1372	13.02	30	0.25	49	0.46	65	0.46	28	0.23	26	0.21	34	0.25
BMK_Unigene_002834	25	1.04	6	0.26	48	2.4	32	1.63	14	0.81	15	0.76	21	0.91	8	0.4	22	0.84	5	0.21	15	0.63	4	0.15
BMK_Unigene_002837	41	0.73	38	0.7	15	0.34	75	1.6	6	0.15	6	0.13	879	16.22	847	17.96	489	7.7	417	7.58	486	8.66	869	14.34
BMK_Unigene_002846	797	15.7	573	11.57	661	15.57	1010	23.95	379	10.38	1045	24.88	777	15.92	726	17.09	1582	27.68	2396	48.28	1370	27.09	1299	23.8
BMK_Unigene_002851	7	0.43	40	2.53	2	0.15	0	0	21	1.78	2	0.15	4	0.26	7	0.51	4	0.22	3	0.19	2	0.12	0	0
BMK_Unigene_002855	0	0	0	0	0	0	0	0	0	0	5	1.83	0	0	5	1.64	0	0	1	0.29	1	0.29	3	0.79
BMK_Unigene_002859	0	0	0	0	0	0	0	0	0	0	0	0	2	0.64	0	0	1	0.29	12	3.77	3	0.92	6	1.69
BMK_Unigene_002862	59	2.55	37	1.65	72	3.69	42	2.17	58	3.44	64	3.3	18	0.81	8	0.42	17	0.65	10	0.46	12	0.52	8	0.34
BMK_Unigene_002863	7	0.25	162	6.03	0	0	0	0	0	0	6	0.26	3	0.11	0	0	4	0.13	17	0.63	1	0.04	3	0.1
BMK_Unigene_002866	650	34.68	656	35.87	170	10.83	231	14.87	683	50.18	195	12.67	28	1.55	43	2.71	1	0.05	17	0.92	7	0.37	56	2.76
BMK_Unigene_002869	0	0	0	0	0	0	0	0	0	0	0	0	0	0	10	2.01	0	0	0	0	2	0.35	2	0.32
BMK_Unigene_002884	0	0	0	0	0	0	2	0.16	0	0	0	0	10	0.68	4	0.31	0	0	0	0	0	0	41	2.54
BMK_Unigene_002889	473	7.21	340	5.32	299	5.45	362	6.64	269	5.71	309	5.69	78	1.24	81	1.48	387	5.22	170	2.66	133	2.05	195	2.77
BMK_Unigene_002893	0	0	1	0.11	2	0.27	2	0.27	12	1.82	1	0.14	1	0.12	0	0	3	0.3	1	0.11	6	0.67	1	0.1
BMK_Unigene_002895	14	0.44	7	0.22	0	0	5	0.19	2	0.09	2	0.08	1	0.03	5	0.19	53	1.48	77	2.47	20	0.63	4	0.12
BMK_Unigene_002900	0	0	0	0	0	0	0	0	0	0	7	2.16	0	0	0	0	0	0	0	0	0	0	5	1.12
BMK_Unigene_002911	0	0	0	0	0	0	0	0	4	1.79	0	0	0	0	0	0	3	0.96	2	0.68	0	0	0	0
BMK_Unigene_002913	2	0.18	3	0.28	3	0.33	0	0	4	0.5	1	0.11	20	1.88	7	0.75	64	5.23	15	1.4	26	2.35	4	0.33
BMK_Unigene_002914	904	11.22	880	11.19	555	8.24	632	9.44	683	11.8	723	10.85	648	8.37	818	12.15	1255	13.81	1187	15.09	1041	12.98	911	10.53
BMK_Unigene_002916	0	0	3	0.76	0	0	0	0	0	0	0	0	0	0	0	0	0	0	8	1.96	0	0	0	0
BMK_Unigene_002922	0	0	0	0	0	0	7	1.87	0	0	0	0	0	0	0	0	1	0.2	2	0.44	2	0.43	0	0
BMK_Unigene_002924	0	0	0	0	0	0	9	2.88	0	0	0	0	0	0	3	0.88	0	0	3	0.78	0	0	5	1.17
BMK_Unigene_002925	0	0	1	0.2	0	0	4	0.97	0	0	0	0	0	0	10	2.25	0	0	0	0	0	0	14	2.5
BMK_Unigene_002928	0	0	0	0	0	0	0	0	8	1.67	0	0	0	0	0	0	3	0.42	14	2.19	6	0.92	0	0
BMK_Unigene_002930	5	0.69	7	0.99	2	0.33	0	0	1	0.19	0	0	5	0.71	3	0.48	10	1.24	17	2.35	2	0.27	1	0.13
BMK_Unigene_002932	681	11.9	856	15.31	531	11.09	300	6.31	832	20.17	529	11.17	657	11.94	11	0.24	547	8.49	44	0.8	19	0.34	6	0.1
BMK_Unigene_002935	18	1.31	4	0.3	21	1.83	2	0.18	6	0.6	2	0.18	1	0.08	0	0	4	0.26	1	0.07	2	0.14	5	0.33
BMK_Unigene_002953	190	1.44	113	0.87	82	0.74	110	1	75	0.8	93	0.85	2175	17.07	2334	21.1	2494	16.66	2784	21.51	2156	16.34	2316	16.27
BMK_Unigene_002956	7	2.08	0	0	0	0	2	0.73	0	0	0	0	0	0	0	0	0	0	3	0.88	0	0	0	0
BMK_Unigene_002957	0	0	0	0	0	0	0	0	0	0	0	0	0	0	0	0	0	0	12	2.49	0	0	0	0
BMK_Unigene_002958	13	0.67	43	2.28	4	0.25	1	0.06	39	2.78	2	0.13	0	0	9	0.55	2	0.09	3	0.16	2	0.1	2	0.1
BMK_Unigene_002959	26	1.71	28	1.88	0	0	42	3.32	9	0.81	2	0.16	44	2.99	25	1.93	12	0.7	153	10.2	37	2.42	74	4.47
BMK_Unigene_002960	58	1.27	16	0.36	9	0.26	13	0.35	83	2.52	31	0.82	138	3.12	97	2.53	352	6.81	133	2.97	209	4.58	242	4.91
BMK_Unigene_002965	331	6.41	1060	21.05	244	5.65	548	12.78	241	6.51	754	17.65	254	5.11	208	4.83	308	5.31	254	5.04	519	10.09	275	4.97
BMK_Unigene_002968	82	3.93	30	1.48	39	2.22	44	2.57	57	3.76	55	3.18	7	0.37	24	1.38	18	0.8	9	0.47	46	2.22	29	1.28
BMK_Unigene_002970	520	7.37	729	10.59	241	4.09	463	7.9	228	4.5	414	7.09	1013	14.93	974	16.51	1040	13.07	798	11.58	953	13.56	738	9.74
BMK_Unigene_002971	30	0.83	15	0.43	27	0.9	78	2.61	21	0.81	16	0.54	170	4.9	113	3.74	161	3.97	348	9.87	172	4.79	261	6.74
BMK_Unigene_002976	0	0	0	0	0	0	6	1.81	0	0	0	0	0	0	1	0.28	0	0	0	0	0	0	0	0
BMK_Unigene_002978	2	0.14	0	0	11	0.94	23	1.98	0	0	0	0	0	0	0	0	1	0.06	5	0.36	3	0.21	0	0
BMK_Unigene_002979	111	2.03	657	12.31	79	1.72	259	5.69	40	1.01	286	6.31	1255	23.82	713	15.58	91	1.49	140	2.61	191	3.5	82	1.39
BMK_Unigene_002980	313	10.32	500	16.89	87	3.44	48	1.9	476	21.7	294	11.72	316	10.81	283	11.12	324	9.5	122	4.1	394	13	549	16.81
BMK_Unigene_002982	304	37.38	346	43.71	122	17.85	90	13.41	182	30.24	211	31.56	283	35.78	184	26.22	283	31.36	243	30.12	312	37.95	233	26.13
BMK_Unigene_002985	41	1.05	52	1.37	22	0.67	5	0.15	96	3.42	14	0.43	15	0.4	14	0.43	9	0.21	18	0.47	20	0.51	13	0.31
BMK_Unigene_002991	490	7.78	1033	16.81	312	5.92	159	3.03	836	18.44	386	7.42	847	13.98	806	15.31	643	9.07	521	8.46	685	10.91	771	11.38
BMK_Unigene_002993	0	0	3	0.2	7	0.54	0	0	34	3.04	10	0.79	0	0	3	0.23	0	0	11	0.73	1	0.07	21	1.26
BMK_Unigene_002995	319	4.79	214	3.29	148	2.66	177	3.19	244	5.08	130	2.35	152	2.38	117	2.11	48	0.64	53	0.82	68	1.03	77	1.07
BMK_Unigene_002996	7	1.89	2	0.56	0	0	0	0	0	0	0	0	0	0	0	0	0	0	0	0	0	0	0	0
BMK_Unigene_002997	100	2.82	62	1.81	82	2.78	189	6.41	62	2.44	120	4.1	504	14.73	438	14.69	533	13.31	408	11.72	346	9.75	466	12.16
BMK_Unigene_003000	9	1.91	0	0	0	0	8	2.28	3	0.84	5	1.3	11	2.38	1	0.24	1	0.19	0	0	4	0.83	3	0.57
BMK_Unigene_003002	5	0.3	7	0.43	9	0.65	6	0.44	10	0.83	2	0.15	0	0	2	0.14	14	0.75	2	0.12	40	2.41	5	0.28
BMK_Unigene_003006	1754	19.21	1559	17.49	1135	14.86	1136	14.96	1206	18.37	1208	15.99	1503	17.13	1181	15.5	3039	29.51	1735	19.46	1974	21.71	1840	18.76
BMK_Unigene_003007	21	2.22	5	0.54	9	1.13	14	1.79	31	4.47	9	1.16	25	2.8	66	8.13	15	1.43	5	0.54	14	1.47	32	3.15
BMK_Unigene_003008	159	15.2	174	17.05	171	19.47	188	21.74	167	21.72	170	19.74	173	17.06	135	15.08	95	8.16	142	13.83	116	11.01	203	17.86
BMK_Unigene_003014	0	0	0	0	0	0	11	1.14	0	0	0	0	0	0	5	0.5	1	0.08	6	0.52	2	0.17	23	1.81
BMK_Unigene_003016	199	7.31	261	9.83	140	6.16	101	4.5	236	11.98	205	9.11	1266	48.22	700	30.54	640	20.92	465	17.42	1714	62.99	869	29.59
BMK_Unigene_003022	34	1.66	3	0.15	16	0.93	30	1.83	0	0	11	0.65	0	0	4	0.23	21	0.92	35	1.79	18	0.88	10	0.45
BMK_Unigene_003025	1522	12.6	1984	16.83	533	5.28	344	3.43	2842	32.76	416	4.16	1675	14.43	1365	13.55	1942	14.25	824	6.99	1422	11.83	1233	9.51
BMK_Unigene_003027	8	0.52	10	0.67	2	0.16	0	0	20	1.8	10	0.79	20	1.36	11	0.85	13	0.76	3	0.27	15	0.98	23	1.39
BMK_Unigene_003029	91	1.44	15	0.24	80	1.52	133	2.54	56	1.24	79	1.51	1071	17.58	827	15.61	1959	27.42	2040	32.93	1477	23.4	1862	27.34
BMK_Unigene_003034	3286	66.96	3344	69.83	1297	31.59	897	22.01	2933	82.94	2045	50.36	295	6.27	267	6.5	649	11.76	277	5.79	381	7.8	273	5.19
BMK_Unigene_003038	26	0.57	27	0.61	16	0.41	38	0.97	21	0.62	6	0.15	125	2.78	99	2.53	78	1.48	129	2.82	115	2.47	103	2.05
BMK_Unigene_003045	0	0	0	0	4	0.26	3	0.2	0	0	0	0	16	0.9	31	1.99	20	0.97	2	0.11	0	0	0	0
BMK_Unigene_003049	0	0	0	0	0	0	9	2.51	0	0	0	0	0	0	0	0	0	0	3	0.68	0	0	0	0
BMK_Unigene_003056	74	3.23	92	4.08	41	2.15	57	3	61	3.68	50	2.66	104	4.66	101	5.23	188	7.26	183	8.08	115	5.01	214	8.57
BMK_Unigene_003062	1501	45.87	2011	62.98	1176	42.96	781	28.73	846	35.78	1183	43.72	1396	44.32	1011	36.81	2262	61.49	1161	36.26	1165	35.67	1081	30.67
BMK_Unigene_003073	395	7.64	277	5.49	50	1.17	202	4.69	314	8.45	130	3.05	143	2.87	177	4.08	166	2.85	216	4.27	94	1.82	138	2.48
BMK_Unigene_003084	0	0	0	0	0	0	12	4.88	0	0	0	0	0	0	0	0	0	0	3	0.98	2	0.64	0	0
BMK_Unigene_003088	0	0	9	2.22	1	0.29	0	0	0	0	0	0	0	0	0	0	0	0	4	0.96	5	1.17	0	0
BMK_Unigene_003093	492	25.99	534	28.91	442	27.86	471	30.01	410	29.81	590	37.74	415	22.73	710	44.43	510	24.05	785	42.26	577	30.44	552	26.94
BMK_Unigene_003096	0	0	0	0	0	0	0	0	3	0.88	0	0	0	0	0	0	0	0	10	2.22	0	0	0	0
BMK_Unigene_003101	8	0.35	4	0.18	0	0	0	0	13	0.79	3	0.16	14	0.64	8	0.42	11	0.43	46	2.07	47	2.08	20	0.82
BMK_Unigene_003105	871	13.12	1270	19.6	144	2.6	1095	19.82	207	4.35	449	8.17	728	11.41	12	0.23	122	1.63	305	4.7	542	8.2	0	0
BMK_Unigene_003107	922	15.67	590	10.28	556	11.31	637	13.02	707	16.7	551	11.33	331	5.85	392	7.97	959	14.47	691	12.02	629	10.73	693	10.96
BMK_Unigene_003108	0	0	0	0	0	0	0	0	0	0	6	2	0	0	0	0	0	0	2	0.54	0	0	0	0
BMK_Unigene_003110	11	0.6	51	2.84	6	0.39	3	0.2	28	2.09	7	0.46	47	2.64	60	3.85	13	0.63	38	2.1	15	0.81	57	2.86
BMK_Unigene_003111	1561	12.87	3087	26.08	398	3.93	1668	16.53	377	4.34	1705	16.98	347	2.98	812	8.03	113	0.83	244	2.07	349	2.9	323	2.49
BMK_Unigene_003112	0	0	0	0	11	2.44	0	0	0	0	0	0	0	0	0	0	0	0	2	0.37	0	0	0	0
BMK_Unigene_003116	0	0	0	0	0	0	0	0	0	0	0	0	0	0	0	0	10	2.1	0	0	0	0	0	0
BMK_Unigene_003117	766	12.41	671	11.13	600	11.62	627	12.21	269	6.07	621	12.14	967	16.29	689	13.35	883	12.69	907	15.03	1009	16.4	998	15.04
BMK_Unigene_003122	0	0	5	0.5	0	0	0	0	0	0	1	0.12	0	0	0	0	0	0	20	1.97	7	0.68	2	0.18
BMK_Unigene_003124	1	0.03	13	0.46	2	0.08	9	0.38	2	0.1	17	0.71	0	0	0	0	36	1.11	25	0.89	6	0.21	71	2.28
BMK_Unigene_003128	13	0.39	2	0.06	2	0.07	10	0.36	12	0.49	13	0.48	68	2.13	19	0.68	81	2.16	51	1.55	66	1.97	67	1.87
BMK_Unigene_003130	78	2.44	28	0.91	63	2.36	49	1.85	6	0.26	42	1.59	34	1.11	29	1.08	25	0.7	20	0.64	26	0.82	6	0.17
BMK_Unigene_003135	1	0.31	4	1.29	1	0.37	3	1.15	4	1.62	4	1.54	0	0	32	11.1	0	0	7	2.46	1	0.3	8	2.21
BMK_Unigene_003140	167	5.2	97	3.09	69	2.57	43	1.61	72	3.1	33	1.24	40	1.32	23	0.85	112	3.1	60	1.92	39	1.23	16	0.49
BMK_Unigene_003144	1807	27.73	1945	30.58	1290	23.67	931	17.18	1533	32.7	1716	31.8	1887	30.12	1500	27.54	3200	43.56	2714	42.62	2716	41.83	2244	32.03
BMK_Unigene_003149	37	1.71	36	1.69	3	0.2	13	0.71	50	3.14	12	0.7	131	6.13	107	5.72	104	4.19	58	2.69	69	3.13	61	2.57
BMK_Unigene_003155	12	0.32	8	0.24	27	0.86	7	0.22	8	0.29	22	0.71	13	0.36	0	0	26	0.61	94	2.56	107	2.85	5	0.12
BMK_Unigene_003162	0	0	0	0	0	0	0	0	0	0	0	0	4	0.74	0	0	0	0	10	1.81	0	0	0	0
BMK_Unigene_003164	116	4.74	27	1.13	65	3.17	57	2.81	1	0.06	61	3.07	8	0.38	14	0.69	3	0.11	26	1.09	19	0.79	47	1.81
BMK_Unigene_003170	3	0.49	4	0.66	0	0	0	0	0	0	0	0	0	0	10	1.85	0	0	0	0	4	0.64	0	0
BMK_Unigene_003173	445	15.5	511	18.24	245	10.2	222	9.31	426	20.51	349	14.7	444	16.05	443	18.36	406	12.59	484	17.22	427	14.93	487	15.76
BMK_Unigene_003174	0	0	0	0	0	0	0	0	0	0	0	0	16	2.3	0	0	1	0.13	11	1.55	1	0.14	1	0.13
BMK_Unigene_003180	0	0	27	3.3	24	3.48	21	3.03	51	8.26	0	0	68	8.34	28	3.87	1	0.11	1	0.12	6	0.71	16	1.74
BMK_Unigene_003183	0	0	1	0.26	0	0	0	0	2	0.66	0	0	0	0	0	0	0	0	0	0	9	2.2	0	0
BMK_Unigene_003190	4	0.73	7	1.31	0	0	4	0.89	8	1.95	2	0.45	3	0.56	0	0	0	0	0	0	0	0	0	0
BMK_Unigene_003197	0	0	2	0.33	0	0	0	0	0	0	0	0	0	0	11	2.03	0	0	0	0	0	0	0	0
BMK_Unigene_003199	14	0.6	10	0.44	30	1.54	57	2.97	1	0.06	15	0.78	3	0.13	1	0.05	2	0.08	9	0.43	0	0	4	0.16
BMK_Unigene_003200	228	9.4	221	9.37	145	7.17	143	7.1	147	8.36	151	7.53	193	8.25	134	6.55	107	3.92	102	4.29	118	4.9	124	4.76
BMK_Unigene_003203	10	1.4	0	0	36	6.01	84	14.37	0	0	12	2.05	4	0.58	0	0	0	0	8	1.13	0	0	0	0
BMK_Unigene_003204	8	0.2	141	3.7	5	0.15	19	0.59	37	1.31	17	0.53	3	0.08	0	0	6	0.14	8	0.21	0	0	4	0.1
BMK_Unigene_003205	19	1.89	68	6.94	1	0.12	43	5.18	11	1.49	50	6.05	292	30.01	223	25.97	147	13.24	121	12.21	296	29.31	405	37
BMK_Unigene_003210	152	6.04	98	3.99	23	1.14	0	0	22	1.21	12	0.58	4	0.16	2	0.09	5	0.18	1	0.04	0	0	3	0.11
BMK_Unigene_003214	0	0	0	0	0	0	0	0	0	0	3	1.11	0	0	0	0	7	1.95	6	1.78	0	0	0	0
BMK_Unigene_003217	662	9.52	642	9.47	589	10.13	742	12.84	541	10.82	586	10.19	203	3.04	125	2.16	260	3.32	151	2.23	228	3.29	137	1.84
BMK_Unigene_003218	0	0	1	0.33	0	0	5	1.97	0	0	1	0.4	0	0	0	0	0	0	0	0	0	0	0	0
BMK_Unigene_003219	27	1.62	37	2.3	9	0.64	12	0.86	65	5.34	4	0.29	10	0.62	20	1.42	0	0	0	0	5	0.3	52	2.86
BMK_Unigene_003221	2	0.53	0	0	3	0.94	1	0.32	6	2.08	0	0	0	0	0	0	2	0.48	0	0	0	0	0	0
BMK_Unigene_003225	405	14.08	459	16.35	266	11.06	391	16.39	264	12.72	266	11.21	297	10.73	167	6.91	523	16.18	224	7.95	343	11.95	318	10.27
BMK_Unigene_003226	1271	14.89	812	9.74	697	9.77	292	4.12	563	9.18	459	6.5	207	2.53	241	3.38	351	3.65	284	3.41	264	3.11	307	3.35
BMK_Unigene_003227	6	0.85	0	0	0	0	14	2.4	0	0	0	0	0	0	0	0	5	0.64	3	0.43	0	0	11	1.41
BMK_Unigene_003231	3	0.24	10	0.84	0	0	2	0.2	16	1.78	7	0.69	0	0	2	0.19	7	0.51	4	0.33	0	0	2	0.15
BMK_Unigene_003235	0	0	0	0	0	0	5	1.65	0	0	6	1.99	0	0	0	0	0	0	7	1.87	0	0	0	0
BMK_Unigene_003236	5	0.2	8	0.33	2	0.09	0	0	9	0.49	2	0.1	14	0.58	30	1.42	36	1.27	30	1.22	33	1.31	52	1.91
BMK_Unigene_003237	1348	7.11	1033	5.59	922	5.82	1023	6.49	1114	8.19	707	4.5	90	0.49	113	0.72	100	0.47	68	0.37	120	0.64	97	0.48
BMK_Unigene_003243	0	0	3	0.58	5	1.12	0	0	0	0	0	0	0	0	0	0	12	2.06	0	0	2	0.37	7	1.19
BMK_Unigene_003246	2329	102.75	1369	61.9	1240	65.37	775	41.2	1493	90.84	1455	77.7	777	35.57	846	44.27	1071	42.14	680	30.58	833	36.75	958	39.12
BMK_Unigene_003247	43	0.69	61	1.01	7	0.14	0	0	463	10.23	7	0.13	0	0	4	0.08	28	0.4	34	0.55	6	0.1	8	0.12
BMK_Unigene_003254	133	0.72	162	0.9	141	0.91	182	1.19	107	0.81	149	0.98	3947	22.25	3571	23.19	4490	21.52	3318	18.4	4546	24.73	4195	21.17
BMK_Unigene_003255	0	0	0	0	0	0	2	0.5	3	0.81	2	0.5	0	0	0	0	9	1.67	29	5.91	3	0.6	1	0.18
BMK_Unigene_003257	0	0	0	0	0	0	4	0.76	0	0	0	0	0	0	13	2.34	0	0	0	0	0	0	1	0.14
BMK_Unigene_003259	6	1.38	1	0.24	2	0.54	5	1.4	1	0.3	3	0.84	12	2.8	0	0	0	0	10	2.28	6	1.34	8	1.64
BMK_Unigene_003262	0	0	2	0.44	2	0.51	2	0.52	1	0.28	8	2.09	0	0	8	1.93	0	0	0	0	3	0.63	0	0
BMK_Unigene_003263	1	0.08	15	1.22	0	0	3	0.29	0	0	3	0.29	18	1.48	4	0.37	25	1.78	10	0.81	14	1.11	13	0.95
BMK_Unigene_003267	0	0	0	0	0	0	0	0	0	0	0	0	0	0	0	0	7	2.53	0	0	0	0	0	0
BMK_Unigene_003271	433	5.24	827	10.23	299	4.32	119	1.73	665	11.17	106	1.55	466	5.85	465	6.73	338	3.62	245	3.03	416	5.04	612	6.88
BMK_Unigene_003273	0	0	8	1.08	0	0	0	0	0	0	3	0.48	1	0.14	13	1.98	5	0.59	4	0.53	0	0	0	0
BMK_Unigene_003275	124	1.67	149	2.06	65	1.05	63	1.02	161	3.02	78	1.27	163	2.29	240	3.87	187	2.24	177	2.44	176	2.38	248	3.11
BMK_Unigene_003278	3	0.67	4	0.91	0	0	0	0	0	0	1	0.27	1	0.23	1	0.25	0	0	3	0.66	11	2.38	12	2.39
BMK_Unigene_003283	0	0	0	0	0	0	0	0	8	2.45	0	0	0	0	0	0	0	0	0	0	0	0	0	0
BMK_Unigene_003289	32	3.96	3	0.38	27	3.97	158	23.68	0	0	8	1.2	8	1.02	0	0	0	0	25	3.12	0	0	3	0.34
BMK_Unigene_003295	109	2.25	118	2.5	18	0.44	26	0.65	373	10.7	38	0.96	0	0	0	0	7	0.13	0	0	2	0.04	12	0.23
BMK_Unigene_003303	5	0.93	5	0.96	0	0	0	0	0	0	0	0	0	0	0	0	17	2.89	3	0.56	0	0	0	0
BMK_Unigene_003306	0	0	5	0.27	5	0.32	2	0.13	0	0	2	0.13	193	10.68	257	16.18	70	3.35	114	6.19	333	17.73	98	4.85
BMK_Unigene_003308	22	0.53	12	0.29	12	0.34	24	0.69	12	0.4	20	0.58	28	0.7	4	0.14	131	2.79	116	2.84	42	1.01	82	1.85
BMK_Unigene_003309	0	0	9	2.23	0	0	0	0	0	0	0	0	0	0	0	0	6	1.33	0	0	1	0.24	1	0.22
BMK_Unigene_003320	0	0	0	0	3	0.72	3	0.74	3	0.81	0	0	0	0	0	0	0	0	0	0	0	0	14	2.56
BMK_Unigene_003321	0	0	0	0	0	0	6	1.52	0	0	0	0	0	0	0	0	10	1.9	0	0	0	0	3	0.56
BMK_Unigene_003323	0	0	4	0.58	0	0	0	0	0	0	0	0	0	0	0	0	0	0	20	2.85	0	0	0	0
BMK_Unigene_003325	61	1.82	125	3.82	34	1.21	68	2.44	66	2.73	50	1.8	124	3.84	50	1.78	45	1.19	74	2.25	54	1.61	75	2.08
BMK_Unigene_003330	72	12.69	4	0.87	42	8.79	12	2.57	14	3.39	13	2.8	0	0	2	0.4	0	0	0	0	2	0.38	0	0
BMK_Unigene_003342	0	0	38	13.79	19	7.92	36	15.6	0	0	13	5.67	0	0	2	0.77	0	0	0	0	0	0	0	0
BMK_Unigene_003347	0	0	0	0	0	0	6	0.63	2	0.24	3	0.32	0	0	0	0	7	0.55	23	2.04	2	0.17	1	0.08
BMK_Unigene_003348	76	2.35	52	1.65	52	1.92	84	3.13	39	1.67	50	1.87	55	1.77	41	1.55	59	1.62	97	3.06	93	2.88	46	1.32
BMK_Unigene_003349	2987	150.21	1937	99.86	6975	418.65	3719	225.45	673	46.62	3549	216.11	12775	665.76	21818	1298.96	10900	488.89	9721	497.84	7019	352.67	6381	296.64
BMK_Unigene_003355	83	2.68	175	5.77	167	6.41	97	3.76	168	7.49	214	8.31	41	1.38	66	2.56	124	3.56	76	2.5	70	2.26	64	1.93
BMK_Unigene_003356	1121	30.29	1353	37.47	1010	32.62	933	30.36	1002	37.54	1345	43.96	31	0.88	38	1.25	36	0.87	49	1.38	26	0.73	42	1.07
BMK_Unigene_003359	5	0.28	8	0.46	9	0.61	1	0.07	12	0.93	10	0.68	12	0.7	28	1.87	12	0.61	13	0.75	32	1.81	12	0.63
BMK_Unigene_003365	1	0.27	0	0	1	0.32	0	0	0	0	2	0.67	9	2.47	0	0	0	0	0	0	0	0	0	0
BMK_Unigene_003367	0	0	0	0	0	0	0	0	6	2.36	0	0	0	0	0	0	0	0	0	0	0	0	0	0
BMK_Unigene_003369	17	1.38	26	2.16	9	0.87	7	0.69	22	2.44	89	8.76	0	0	11	1.05	2	0.15	4	0.33	0	0	12	0.89
BMK_Unigene_003371	1	0.12	1	0.12	0	0	3	0.43	0	0	3	0.43	10	1.21	21	2.87	31	3.29	16	2.02	37	4.31	15	1.61
BMK_Unigene_003376	5	0.64	0	0	0	0	3	0.46	0	0	0	0	13	1.7	117	17.27	6	0.69	10	1.28	69	8.7	83	9.76
BMK_Unigene_003380	35	0.69	203	4.13	32	0.76	124	2.95	69	1.9	35	0.84	32	0.66	49	1.16	31	0.55	54	1.09	38	0.75	61	1.13
BMK_Unigene_003384	3	0.09	4	0.13	0	0	0	0	0	0	0	0	18	0.58	36	1.32	180	4.94	12	0.41	0	0	7	0.2
BMK_Unigene_003391	32	2.49	18	1.43	27	2.5	3	0.28	72	7.65	9	0.85	1	0.08	12	1.1	0	0	0	0	5	0.39	1	0.07
BMK_Unigene_003397	577	23.7	325	13.67	353	17.34	567	28.04	325	18.45	321	15.94	169	7.21	234	11.4	512	18.75	234	9.82	223	9.19	623	23.7
BMK_Unigene_003403	78	1.78	124	2.9	11	0.3	11	0.3	305	9.65	13	0.36	21	0.5	16	0.44	23	0.47	48	1.12	31	0.72	42	0.89
BMK_Unigene_003404	6	0.23	7	0.28	3	0.14	2	0.09	3	0.16	3	0.14	15	0.6	9	0.42	35	1.21	16	0.63	58	2.25	44	1.58
BMK_Unigene_003408	0	0	0	0	0	0	0	0	0	0	3	1.41	0	0	9	3.69	0	0	0	0	0	0	0	0
BMK_Unigene_003410	0	0	0	0	2	0.94	0	0	0	0	0	0	0	0	0	0	5	1.86	0	0	0	0	0	0
BMK_Unigene_003412	152	4	76	2.05	34	1.07	220	6.96	112	4.08	145	4.63	1	0.03	12	0.38	18	0.42	27	0.73	30	0.79	35	0.88
BMK_Unigene_003413	334	5.8	102	1.83	2397	49.65	1956	40.77	88	2.13	979	20.51	3	0.05	5	0.12	0	0	1	0.02	8	0.14	13	0.22
BMK_Unigene_003415	0	0	1	0.2	0	0	0	0	15	3.86	0	0	0	0	0	0	2	0.35	0	0	0	0	0	0
BMK_Unigene_003417	0	0	3	0.44	0	0	0	0	0	0	0	0	1	0.15	1	0.17	0	0	0	0	13	1.85	3	0.39
BMK_Unigene_003421	8	2.03	0	0	0	0	0	0	0	0	0	0	0	0	0	0	0	0	0	0	0	0	0	0
BMK_Unigene_003423	54	2.48	25	1.18	43	2.37	37	2.06	53	3.39	54	3.02	337	16.02	287	15.59	603	24.61	812	37.9	577	26.44	443	18.77
BMK_Unigene_003429	3027	30.43	2768	28.52	2038	24.51	1622	19.61	2573	36	2456	29.83	1806	18.9	1976	23.81	2574	22.94	1885	19.41	2100	21.21	2387	22.35
BMK_Unigene_003432	758	12.21	1156	19.1	411	7.94	287	5.56	507	11.36	602	11.72	966	16.2	698	13.46	407	5.82	229	3.78	665	10.77	638	9.57
BMK_Unigene_003434	164	3.58	147	3.3	134	3.5	74	1.96	194	5.88	123	3.28	2	0.05	2	0.05	4	0.08	5	0.11	0	0	3	0.06
BMK_Unigene_003439	2	0.76	0	0	0	0	6	2.8	0	0	0	0	0	0	0	0	0	0	0	0	0	0	0	0
BMK_Unigene_003440	78	3.5	52	2.39	34	1.82	70	3.79	40	2.48	47	2.55	2	0.09	0	0	2	0.08	0	0	0	0	1	0.04
BMK_Unigene_003444	11	1.05	11	1.08	1	0.11	6	0.69	33	4.29	0	0	0	0	0	0	0	0	5	0.48	0	0	0	0
BMK_Unigene_003446	12	1.96	0	0	0	0	0	0	0	0	0	0	2	0.33	0	0	0	0	2	0.33	0	0	0	0
BMK_Unigene_003452	0	0	3	1.02	0	0	0	0	0	0	0	0	0	0	0	0	0	0	0	0	6	1.92	0	0
BMK_Unigene_003458	456	55.14	457	56.64	9	1.29	0	0	724	118.37	1	0.15	172	21.39	348	48.8	18	1.96	0	0	67	8.02	53	5.85
BMK_Unigene_003459	40	0.67	26	0.45	15	0.31	66	1.32	16	0.38	19	0.38	1513	25.95	1749	34.49	2884	42.22	2157	36.41	2427	40.17	2863	43.92
BMK_Unigene_003460	0	0	0	0	0	0	0	0	0	0	4	2	0	0	0	0	0	0	0	0	0	0	0	0
BMK_Unigene_003461	542	8.34	588	9.27	186	3.42	276	5.12	568	12.14	264	4.91	800	12.8	609	11.21	940	12.82	628	9.88	836	12.9	808	11.56
BMK_Unigene_003463	269	6.58	629	15.71	466	13.59	2250	66	244	8.26	395	11.66	308	7.8	407	11.86	74	1.61	211	5.26	144	3.54	141	3.21
BMK_Unigene_003465	6	1.23	5	1.06	0	0	1	0.25	8	2.18	1	0.25	20	4.19	5	1.16	2	0.37	5	1.03	3	0.6	13	2.4
BMK_Unigene_003467	257	4.25	186	3.16	327	6.47	142	2.83	249	5.73	224	4.48	235	4.06	140	2.78	402	5.91	869	14.73	240	3.99	573	8.82
BMK_Unigene_003485	26	1.22	47	2.24	5	0.27	5	0.28	34	2.2	24	1.36	1	0.05	0	0	2	0.08	0	0	0	0	6	0.25
BMK_Unigene_003490	98	1.9	111	2.21	53	1.23	35	0.82	72	1.95	31	0.73	39	0.79	19	0.44	183	3.16	80	1.59	79	1.54	139	2.51
BMK_Unigene_003492	1033	18.48	1063	19.48	1079	23.07	1442	31.01	2886	71.68	1090	23.57	412	7.66	404	8.64	624	9.91	609	11.15	586	10.52	769	12.79
BMK_Unigene_003493	22	0.4	4	0.09	12	0.28	7	0.16	4	0.1	8	0.19	150	2.86	120	2.64	248	4.05	456	8.56	179	3.31	245	4.18
BMK_Unigene_003495	129	5.57	130	5.75	120	6.17	78	4.08	128	7.58	89	4.66	226	10.08	114	5.84	626	23.98	292	12.8	305	13.11	391	15.57
BMK_Unigene_003496	42	0.6	74	1.07	17	0.29	7	0.12	33	0.67	13	0.22	1032	15.16	1280	21.65	513	6.44	526	7.61	774	10.98	890	11.7
BMK_Unigene_003497	0	0	0	0	0	0	12	1.94	1	0.18	3	0.49	0	0	0	0	4	0.48	4	0.54	2	0.26	6	0.73
BMK_Unigene_003498	7	0.36	12	0.63	0	0	6	0.37	0	0	3	0.19	23	1.21	12	0.72	257	11.68	20	1.04	24	1.22	4	0.19
BMK_Unigene_003505	54	2.66	321	16.22	44	2.59	145	8.62	92	6.25	196	11.7	180	9.2	155	9.05	86	3.78	237	11.9	203	10.01	292	13.31
BMK_Unigene_003506	822	14.03	927	16.23	421	8.6	620	12.73	1018	24.14	630	13.01	541	9.62	535	10.93	700	10.61	673	11.75	638	10.94	763	12.12
BMK_Unigene_003507	1	0.07	9	0.64	0	0	0	0	21	1.98	0	0	0	0	2	0.16	2	0.12	7	0.49	6	0.41	4	0.25
BMK_Unigene_003508	0	0	0	0	0	0	0	0	8	2.46	0	0	0	0	0	0	2	0.43	0	0	0	0	0	0
BMK_Unigene_003513	0	0	0	0	0	0	0	0	0	0	4	1.99	0	0	0	0	0	0	0	0	3	1.15	0	0
BMK_Unigene_003514	1781	36	1401	29.03	1861	44.95	3832	93.16	832	23.36	2354	57.51	690	14.51	665	16.07	2056	36.89	2565	53.02	1865	37.83	1040	19.54
BMK_Unigene_003524	0	0	0	0	5	2.05	0	0	1	0.45	0	0	3	1.04	1	0.38	0	0	0	0	4	1.33	0	0
BMK_Unigene_003526	0	0	0	0	0	0	0	0	0	0	0	0	12	3.3	9	2.72	0	0	0	0	0	0	1	0.24
BMK_Unigene_003529	0	0	0	0	0	0	7	1.84	0	0	0	0	0	0	0	0	0	0	0	0	0	0	0	0
BMK_Unigene_003535	9	0.18	3	0.06	7	0.17	47	1.16	6	0.17	11	0.27	9	0.19	3	0.07	146	2.65	1478	30.95	72	1.5	5	0.1
BMK_Unigene_003537	2	0.12	3	0.18	0	0	4	0.29	15	1.22	1	0.07	95	5.84	108	7.59	170	9.07	178	10.77	208	12.35	306	16.83
BMK_Unigene_003539	16639	526.66	6109	198.18	72020	2723.19	46043	1754.6	4198	183.87	27977	1070.95	31046	1020.4	11178	421.21	24907	701.15	29703	959.94	27446	870.16	52330	1536.54
BMK_Unigene_003540	0	0	11	4.46	0	0	0	0	0	0	0	0	0	0	2	0.85	0	0	0	0	0	0	0	0
BMK_Unigene_003547	0	0	9	2.85	0	0	0	0	0	0	0	0	3	0.93	0	0	0	0	0	0	0	0	0	0
BMK_Unigene_003552	5	0.41	0	0	0	0	0	0	0	0	3	0.3	23	1.96	1	0.1	8	0.59	8	0.67	4	0.33	9	0.68
BMK_Unigene_003554	5	0.31	4	0.26	0	0	0	0	28	2.39	0	0	0	0	0	0	0	0	0	0	0	0	3	0.17
BMK_Unigene_003559	1509	19.49	1758	23.27	1110	17.14	2072	32.17	1433	25.73	2003	31.25	2785	37.41	2025	31.3	3959	45.33	5274	69.7	3918	50.79	3263	39.22
BMK_Unigene_003563	6	0.87	1	0.15	0	0	0	0	23	4.49	0	0	0	0	0	0	1	0.13	0	0	0	0	0	0
BMK_Unigene_003570	1	0.24	0	0	1	0.29	4	1.18	0	0	0	0	0	0	0	0	0	0	3	0.72	0	0	13	2.83
BMK_Unigene_003574	1257	14.96	1286	15.68	747	10.64	602	8.62	1153	19.09	995	14.31	1204	14.91	1101	15.69	1420	14.98	1439	17.53	1301	15.55	1567	17.36
BMK_Unigene_003575	0	0	0	0	0	0	0	0	0	0	0	0	0	0	0	0	0	0	0	0	10	2.74	1	0.25
BMK_Unigene_003576	1404	21.3	876	13.62	1050	19.04	1253	22.85	936	19.74	828	15.18	1579	24.9	1094	19.86	2262	30.43	1370	21.26	1785	27.18	1635	23.07
BMK_Unigene_003587	53	2.84	28	1.54	163	10.5	94	6.08	29	2.14	76	4.94	2	0.11	0	0	10	0.48	11	0.6	6	0.32	0	0
BMK_Unigene_003588	0	0	0	0	0	0	0	0	3	1.4	0	0	0	0	0	0	0	0	0	0	0	0	7	2.23
BMK_Unigene_003590	197	1.86	116	1.13	65	0.74	33	0.38	89	1.18	37	0.42	305	3	445	5.04	99	0.83	275	2.66	466	4.42	220	1.94
BMK_Unigene_003599	1002	15.43	1315	20.75	645	11.87	380	7.04	900	19.26	732	13.62	244	3.92	180	3.33	249	3.41	191	3.01	208	3.22	213	3.06
BMK_Unigene_003608	14941	171.84	3259	38.42	7040	96.81	19813	273.94	1048	16.78	4702	65.32	1542	18.45	1810	24.93	9981	101.78	13337	157.05	7635	88.2	6461	69.2
BMK_Unigene_003609	2	0.68	19	6.66	4	1.61	27	11.3	5	2.2	4	1.68	1	0.34	6	2.23	3	0.95	8	2.68	6	1.97	4	1.2
BMK_Unigene_003611	0	0	4	0.48	4	0.56	0	0	8	1.28	6	0.86	4	0.49	11	1.51	10	1.06	7	0.83	16	1.87	3	0.32
BMK_Unigene_003612	117	10.33	196	17.74	107	11.27	30	3.23	97	11.79	103	11.04	122	11.12	78	8.06	141	11.17	98	8.77	151	13.26	94	7.62
BMK_Unigene_003613	1014	12.14	164	2.01	1716	24.55	950	13.67	190	3.17	1046	15.12	149	1.86	26	0.39	728	7.72	342	4.19	1137	13.66	135	1.51
BMK_Unigene_003620	26	4.57	0	0	2	0.42	0	0	0	0	7	1.5	1	0.18	0	0	0	0	0	0	5	0.86	1	0.16
BMK_Unigene_003621	950	13.33	915	13.16	969	16.26	796	13.44	717	13.99	740	12.55	851	12.43	1030	17.3	351	4.37	605	8.69	535	7.54	857	11.19
BMK_Unigene_003622	14	0.56	4	0.16	8	0.38	6	0.29	3	0.17	24	1.16	5	0.21	30	1.42	76	2.7	54	2.2	25	1	41	1.52
BMK_Unigene_003625	75	2.92	87	3.44	23	1.06	39	1.81	150	7.99	6	0.28	10	0.4	25	1.16	11	0.4	20	0.81	1	0.04	17	0.63
BMK_Unigene_003631	244	4.52	190	3.6	115	2.54	158	3.52	233	5.99	137	3.06	130	2.51	124	2.74	88	1.45	147	2.79	101	1.88	147	2.53
BMK_Unigene_003635	129	2.74	171	3.71	99	2.5	271	6.89	142	4.18	148	3.79	643	14.11	688	17.35	218	4.09	1280	27.64	943	19.96	973	19.1
BMK_Unigene_003643	0	0	0	0	0	0	0	0	0	0	0	0	61	6.5	81	9.8	62	5.8	128	13.32	79	8.09	82	7.82
BMK_Unigene_003649	143	19.92	165	23.44	114	18.77	32	5.5	104	19.38	69	11.7	112	15.91	87	13.98	121	15.12	65	9.05	98	13.39	78	9.82
BMK_Unigene_003650	299	9.27	494	15.67	98	3.63	87	3.28	530	22.69	384	14.38	13	0.42	28	1.05	44	1.21	7	0.25	16	0.51	22	0.66
BMK_Unigene_003653	0	0	0	0	8	3.24	0	0	0	0	0	0	0	0	0	0	0	0	0	0	0	0	0	0
BMK_Unigene_003659	443	8.36	275	5.32	216	4.87	492	11.17	347	9.09	283	6.45	169	3.32	212	4.78	277	4.64	285	5.5	227	4.3	339	5.95
BMK_Unigene_003660	271	10.14	246	9.43	166	7.43	200	9	166	8.57	220	9.97	18	0.72	15	0.67	94	3.13	4	0.15	33	1.24	81	2.82
BMK_Unigene_003666	665	17.81	824	22.61	37	1.18	8	0.26	1370	50.81	21	0.71	666	18.52	275	8.78	94	2.26	11	0.3	69	1.85	32	0.8
BMK_Unigene_003672	2693	41.14	1257	19.69	1299	23.73	2067	37.97	947	20.11	1451	26.79	1187	18.87	1110	20.29	863	11.71	1053	16.47	1182	18.13	1075	15.28
BMK_Unigene_003673	7	0.39	14	0.7	7	0.41	28	1.65	5	0.34	4	0.24	9	0.45	19	1.1	6	0.26	36	1.79	6	0.29	6	0.27
BMK_Unigene_003676	0	0	0	0	0	0	8	2.03	0	0	0	0	0	0	0	0	0	0	0	0	5	1.02	7	1.31
BMK_Unigene_003685	110	4.6	92	3.95	50	2.48	48	2.4	85	4.89	40	2.03	0	0	0	0	2	0.07	1	0.04	0	0	1	0.04
BMK_Unigene_003686	0	0	0	0	3	0.57	0	0	0	0	0	0	3	0.49	1	0.18	0	0	0	0	1	0.16	14	2.03
BMK_Unigene_003688	821	20.09	616	15.44	436	12.74	510	15.01	786	26.67	681	20.14	104	2.64	122	3.56	115	2.5	313	7.83	224	5.49	192	4.36
BMK_Unigene_003706	0	0	3	0.3	9	1.05	3	0.36	0	0	0	0	22	2.23	2	0.23	0	0	4	0.4	1	0.1	0	0
BMK_Unigene_003708	903	28	648	20.58	606	22.44	507	18.93	486	20.87	682	25.59	164	5.3	63	2.34	32	0.9	66	2.1	148	4.61	61	1.77
BMK_Unigene_003716	6	0.44	1	0.07	7	0.61	15	1.32	7	0.7	0	0	0	0	0	0	26	1.69	19	1.47	34	2.46	12	0.8
BMK_Unigene_003720	65	3.53	161	8.96	3	0.19	0	0	283	21.14	1	0.07	3	0.17	1	0.06	2	0.1	0	0	0	0	0	0
BMK_Unigene_003728	585	12.03	356	7.5	379	9.31	338	8.36	816	23.3	374	9.29	28	0.6	114	2.8	23	0.42	14	0.32	203	4.19	77	1.48
BMK_Unigene_003735	2	0.47	5	1.2	0	0	0	0	0	0	0	0	0	0	0	0	12	2.57	0	0	0	0	1	0.21
BMK_Unigene_003743	0	0	11	1.92	0	0	0	0	0	0	1	0.21	0	0	1	0.2	8	1.24	0	0	0	0	9	1.39
BMK_Unigene_003744	596	7.03	644	7.79	582	8.22	750	10.64	707	11.61	897	12.79	879	10.8	707	10	960	10.04	584	7.06	571	6.77	1123	12.34
BMK_Unigene_003746	1	0.27	0	0	0	0	0	0	6	2.11	0	0	0	0	0	0	0	0	4	1.06	0	0	0	0
BMK_Unigene_003749	1	0.03	0	0	2	0.06	59	1.88	8	0.29	13	0.41	23	0.63	19	0.6	41	0.96	70	1.89	5	0.13	66	1.62
BMK_Unigene_003752	190	3.88	165	3.47	101	2.48	52	1.28	104	2.96	84	2.08	23	0.51	58	1.42	8	0.16	32	0.68	38	0.78	45	0.87
BMK_Unigene_003758	0	0	0	0	0	0	0	0	12	3.84	0	0	9	2.22	0	0	0	0	0	0	0	0	0	0
BMK_Unigene_003761	2	0.37	0	0	0	0	0	0	5	1.23	0	0	0	0	0	0	0	0	5	0.92	7	1.27	12	2
BMK_Unigene_003763	0	0	3	0.99	0	0	0	0	0	0	0	0	0	0	0	0	0	0	9	2.85	0	0	0	0
BMK_Unigene_003766	0	0	0	0	0	0	1	0.46	4	1.92	0	0	3	1.12	0	0	0	0	0	0	0	0	0	0
BMK_Unigene_003769	0	0	0	0	0	0	0	0	2	0.93	4	1.79	0	0	0	0	0	0	0	0	0	0	0	0
BMK_Unigene_003770	120	3.88	281	9.31	28	1.08	18	0.7	96	4.29	17	0.66	12	0.4	32	1.23	1	0.03	11	0.36	15	0.49	2	0.06
BMK_Unigene_003772	0	0	0	0	0	0	0	0	0	0	0	0	0	0	5	1.24	4	0.8	0	0	12	2.57	0	0
BMK_Unigene_003775	0	0	0	0	6	2.08	1	0.36	5	1.91	0	0	0	0	0	0	0	0	2	0.58	0	0	0	0
BMK_Unigene_003776	11	2.39	0	0	0	0	0	0	1	0.29	0	0	0	0	0	0	0	0	0	0	0	0	3	0.58
BMK_Unigene_003777	1285	22.55	995	17.88	986	20.69	1090	23.01	922	22.47	1133	24.03	1330	24.25	1011	21.21	1706	26.55	1471	26.4	1482	26.08	1297	21.17
BMK_Unigene_003784	40	1.41	49	1.77	18	0.76	17	0.72	60	2.94	7	0.3	22	0.81	138	5.8	54	1.7	24	0.87	89	3.18	164	5.37
BMK_Unigene_003786	4	0.07	10	0.16	6	0.11	6	0.11	1	0.02	2	0.04	350	5.31	176	3.06	712	9.2	462	6.88	505	7.38	453	6.13
BMK_Unigene_003791	0	0	3	0.17	0	0	0	0	7	0.53	2	0.13	1	0.06	4	0.26	52	2.56	14	0.79	23	1.27	9	0.46
BMK_Unigene_003793	0	0	0	0	0	0	1	0.2	2	0.43	0	0	0	0	0	0	0	0	1	0.16	5	0.8	13	1.9
BMK_Unigene_003796	9	1.01	9	1.04	4	0.54	0	0	14	2.14	20	2.74	0	0	0	0	4	0.41	8	0.91	11	1.23	6	0.62
BMK_Unigene_003798	17	1.03	8	0.5	5	0.36	25	1.82	3	0.25	7	0.51	4	0.25	2	0.14	6	0.32	5	0.31	7	0.42	1	0.06
BMK_Unigene_003799	21	0.33	38	0.61	36	0.66	27	0.51	14	0.3	39	0.73	108	1.72	52	0.96	168	2.29	141	2.21	127	1.95	91	1.3
BMK_Unigene_003810	0	0	0	0	8	1.58	10	2.02	0	0	0	0	0	0	4	0.76	0	0	0	0	0	0	2	0.3
BMK_Unigene_003813	2	0.08	5	0.19	2	0.11	4	0.19	0	0	0	0	258	9.29	222	9.17	137	4.24	67	2.38	210	7.3	112	3.63
BMK_Unigene_003814	28	1.1	30	1.24	13	0.61	13	0.61	5	0.27	8	0.38	32	1.3	47	2.19	83	2.9	40	1.6	88	3.46	72	2.62
BMK_Unigene_003817	844	6.95	1020	8.61	400	3.94	452	4.48	757	8.68	571	5.68	347	2.98	196	1.94	421	3.08	558	4.71	275	2.27	376	2.89
BMK_Unigene_003818	60	5.04	50	4.29	57	5.63	55	5.6	14	1.58	62	6.23	3	0.26	2	0.2	4	0.3	0	0	0	0	1	0.08
BMK_Unigene_003820	0	0	0	0	0	0	4	1.97	0	0	0	0	0	0	0	0	0	0	0	0	0	0	0	0
BMK_Unigene_003824	0	0	0	0	6	2.28	0	0	0	0	0	0	0	0	0	0	0	0	3	0.95	0	0	0	0
BMK_Unigene_003825	3	0.19	1	0.07	0	0	11	0.84	21	1.83	0	0	6	0.39	0	0	8	0.45	0	0	0	0	3	0.18
BMK_Unigene_003833	114	1.12	181	1.82	76	0.89	108	1.29	154	2.12	117	1.39	81	0.84	40	0.47	109	0.96	80	0.81	72	0.71	44	0.41
BMK_Unigene_003834	0	0	0	0	0	0	0	0	0	0	2	0.13	23	1.32	59	3.92	1	0.05	0	0	54	3	12	0.62
BMK_Unigene_003844	0	0	5	1.41	7	2.27	0	0	1	0.36	1	0.34	4	1.11	0	0	0	0	0	0	3	0.8	0	0
BMK_Unigene_003855	71	1.26	81	1.47	65	1.37	32	0.68	72	1.79	19	0.41	50	0.92	63	1.33	49	0.77	130	2.35	72	1.28	154	2.53
BMK_Unigene_003857	19	0.59	23	0.73	27	1	0	0	7	0.3	157	5.91	10	0.32	1	0.04	22	0.61	85	2.7	13	0.42	42	1.21
BMK_Unigene_003862	0	0	0	0	4	1.79	0	0	0	0	0	0	0	0	6	2.46	0	0	0	0	0	0	0	0
BMK_Unigene_003863	2	0.53	0	0	0	0	6	1.95	0	0	0	0	0	0	5	1.48	0	0	0	0	0	0	4	0.95
BMK_Unigene_003867	1	0.03	5	0.15	2	0.07	5	0.18	10	0.39	5	0.17	1213	35.2	625	20.81	1549	38.46	1155	32.96	898	25.15	1615	41.86
BMK_Unigene_003869	11	0.43	15	0.6	6	0.28	7	0.33	6	0.33	3	0.14	1	0.04	8	0.37	17	0.6	61	2.46	23	0.9	12	0.44
BMK_Unigene_003870	2335	44	2032	39.24	1662	37.45	2424	54.95	905	23.68	1797	40.92	1896	37.15	1378	31.04	2647	44.29	1587	30.6	1925	36.4	1367	23.97
BMK_Unigene_003872	27	1.32	53	2.65	42	2.44	11	0.65	80	5.37	8	0.47	0	0	2	0.12	8	0.35	4	0.2	9	0.44	0	0
BMK_Unigene_003875	104	1.79	115	2.02	83	1.7	67	1.38	48	1.16	81	1.69	248	4.43	199	4.1	335	5.11	277	4.86	216	3.73	214	3.43
BMK_Unigene_003881	167	3.14	186	3.58	124	2.79	93	2.1	93	2.42	205	4.64	457	8.89	406	9.1	328	5.45	236	4.53	188	3.54	568	9.89
BMK_Unigene_003882	39	0.73	16	0.31	16	0.36	38	0.85	30	0.78	35	0.79	255	4.96	22	0.5	236	3.92	67	1.28	153	2.88	60	1.06
BMK_Unigene_003883	36	1.02	45	1.3	39	1.31	46	1.56	28	1.09	33	1.13	54	1.58	23	0.77	82	2.06	115	3.31	50	1.41	48	1.26
BMK_Unigene_003884	109	8.62	84	6.81	39	3.68	25	2.39	42	4.54	53	5.08	48	3.95	38	3.53	31	2.2	47	3.85	15	1.18	26	1.89
BMK_Unigene_003885	434	12.65	333	9.94	204	7.12	478	16.76	359	14.49	463	16.32	142	4.31	166	5.78	418	10.82	383	11.39	446	13.03	443	11.97
BMK_Unigene_003887	171	8.08	111	5.37	132	7.44	86	4.95	126	8.2	72	4.12	219	10.76	166	9.29	306	12.88	163	7.85	191	9.02	173	7.56
BMK_Unigene_003890	153	31.04	284	59.1	88	21.18	49	12.1	137	36.9	128	31.75	131	27.23	227	52.21	99	18.28	131	26.67	67	13.3	95	17.33
BMK_Unigene_003891	150	4.36	7	0.21	460	15.98	805	28.18	24	0.97	360	12.66	87	2.63	70	2.42	118	3.05	512	15.21	451	13.14	308	8.32
BMK_Unigene_003895	13	0.22	7	0.12	7	0.14	3	0.06	10	0.24	9	0.18	64	1.13	121	2.45	18	0.27	132	2.28	28	0.48	123	1.94
BMK_Unigene_003897	732	86.95	97	11.8	89	12.57	142	20.52	56	8.99	165	23.82	25	3.05	24	3.31	17	1.82	79	9.46	45	5.29	64	6.93
BMK_Unigene_003900	3432	70.99	4401	93.28	2844	70.31	1794	44.65	3193	91.64	3483	87.07	2	0.06	12	0.31	9	0.17	1	0.03	16	0.34	14	0.27
BMK_Unigene_003902	577	6.59	725	8.48	262	3.58	185	2.55	665	10.57	338	4.67	417	4.95	350	4.79	248	2.51	248	2.91	320	3.68	565	6.01
BMK_Unigene_003903	78	3.46	41	1.89	332	17.58	52	2.82	6	0.42	138	7.4	1322	60.63	1234	64.73	1813	71.47	1770	79.8	1611	71.24	2259	92.47
BMK_Unigene_003904	5	0.13	14	0.37	77	2.39	40	1.25	155	5.6	25	0.79	17	0.46	14	0.43	58	1.34	22	0.58	4	0.1	34	0.82
BMK_Unigene_003908	95	5.85	119	7.5	271	19.79	160	11.79	10	0.84	881	65.15	41	2.65	0	0	6	0.38	116	7.23	79	4.85	129	7.31
BMK_Unigene_003909	583	7.72	683	9.27	347	5.49	257	4.09	576	10.61	362	5.8	1082	14.9	1683	26.65	2125	24.93	1454	19.69	1564	20.78	1786	22
BMK_Unigene_003919	0	0	14	0.21	0	0	27	0.47	15	0.31	8	0.15	496	7.4	348	5.98	817	10.38	919	13.48	762	10.97	459	6.12
BMK_Unigene_003921	2	0.08	21	0.86	4	0.19	10	0.48	2	0.11	3	0.14	16	0.66	39	1.84	11	0.39	16	0.65	27	1.08	20	0.74
BMK_Unigene_003923	469	7.28	434	6.91	305	5.67	832	15.53	419	9.05	391	7.33	220	3.55	166	3.09	401	5.53	224	3.57	294	4.58	325	4.69
BMK_Unigene_003924	2	0.25	0	0	0	0	8	1.21	0	0	0	0	15	1.92	0	0	0	0	2	0.25	0	0	0	0
BMK_Unigene_003925	95	1.88	60	1.22	33	0.78	10	0.24	49	1.34	31	0.74	20	0.41	21	0.5	14	0.25	5	0.1	21	0.42	30	0.55
BMK_Unigene_003926	27	0.62	90	2.12	21	0.58	22	0.61	191	6.13	13	0.36	16	0.38	0	0	28	0.57	16	0.38	0	0	24	0.51
BMK_Unigene_003927	333	3.6	236	2.62	274	3.55	326	4.24	184	2.77	242	3.17	843	9.49	663	8.59	1459	13.98	1396	15.46	1104	12	1122	11.3
BMK_Unigene_003928	2167	21.3	1526	15.37	1200	14.1	1081	12.77	1283	17.55	1150	13.65	602	6.16	531	6.26	493	4.3	491	4.95	738	7.29	601	5.51
BMK_Unigene_003930	96	4.06	202	8.68	62	3.15	62	3.13	133	7.73	97	4.92	264	11.53	153	7.61	95	3.58	130	5.56	139	5.87	230	8.97
BMK_Unigene_003933	618	9.78	885	14.37	76	1.44	29	0.55	1193	26.24	160	3.06	0	0	11	0.21	0	0	0	0	0	0	3	0.04
BMK_Unigene_003934	40	1.69	51	2.2	31	1.57	16	0.81	25	1.46	39	1.98	19	0.83	10	0.5	15	0.56	4	0.17	7	0.29	28	1.09
BMK_Unigene_003935	0	0	2	0.21	11	1.31	3	0.36	14	1.9	5	0.61	1	0.1	0	0	5	0.45	8	0.81	0	0	3	0.28
BMK_Unigene_003937	1	0.09	1	0.09	2	0.21	3	0.32	15	1.79	6	0.64	6	0.54	0	0	4	0.31	0	0	0	0	6	0.48
BMK_Unigene_003938	1094	18.39	1250	21.52	769	15.45	720	14.55	1601	37.39	837	16.99	877	15.32	1095	22	643	9.59	601	10.33	665	11.23	1046	16.36
BMK_Unigene_003939	50	1.92	5	0.2	10	0.46	571	26.41	37	1.96	30	1.39	20	0.8	15	0.68	9	0.34	6	0.23	45	1.73	4	0.14
BMK_Unigene_003942	847	18.97	1020	23.42	689	18.44	558	15.05	735	22.83	854	23.13	48	1.12	155	4.17	79	1.57	60	1.39	88	1.99	175	3.66
BMK_Unigene_003943	44	1.83	8	0.34	0	0	5	0.25	0	0	9	0.45	4	0.17	1	0.05	3	0.11	0	0	0	0	0	0
BMK_Unigene_003944	457	16.53	304	11.27	238	10.28	311	13.55	263	13.15	345	15.09	293	11	277	11.91	730	23.5	511	18.86	631	22.88	334	11.2
BMK_Unigene_003945	24	0.71	14	0.42	12	0.42	8	0.29	21	0.86	32	1.15	1231	37.62	838	29.38	1392	36.43	873	26.25	1254	36.98	1132	30.91
BMK_Unigene_003946	230	3.73	641	10.63	180	3.49	117	2.28	209	4.7	291	5.69	57	0.97	46	0.91	9	0.13	96	1.6	21	0.35	28	0.43
BMK_Unigene_003947	97	2.64	107	2.96	46	1.5	28	0.91	53	1.98	77	2.52	64	1.8	81	2.63	262	6.29	43	1.18	158	4.29	151	3.79
BMK_Unigene_003948	0	0	67	0.86	5	0.08	12	0.18	3	0.05	6	0.09	135	1.77	84	1.27	174	1.94	146	1.88	87	1.1	130	1.52
BMK_Unigene_003950	2719	35.6	1560	20.93	1348	21.11	4690	73.83	3185	57.99	2599	41.1	1571	21.41	558	8.75	1269	14.74	1867	25.03	1541	20.26	6717	81.85
BMK_Unigene_003952	48	0.25	240	1.28	36	0.22	118	0.74	155	1.12	67	0.42	5062	27.29	8702	54.05	2538	11.64	2646	14.04	3569	18.57	2662	12.85
BMK_Unigene_003955	269	3.68	255	3.58	169	2.77	64	1.05	268	5.1	155	2.56	311	4.44	192	3.15	181	2.2	90	1.27	130	1.8	240	3.07
BMK_Unigene_003957	35	1.58	48	2.21	26	1.44	5	0.27	41	2.58	18	0.99	19	0.88	23	1.26	12	0.48	15	0.68	12	0.54	31	1.28
BMK_Unigene_003959	25	1.5	52	3.2	11	0.79	3	0.22	12	0.99	4	0.29	11	0.68	1	0.07	3	0.16	9	0.55	3	0.18	0	0
BMK_Unigene_003960	285	4.26	191	2.92	219	3.91	250	4.49	118	2.45	211	3.8	2594	40.24	2032	36.25	3590	47.48	2269	34.62	1933	28.93	2530	35.11
BMK_Unigene_003961	123	1.52	635	7.99	210	3.08	129	1.92	136	2.33	609	9.03	318	4.07	356	5.24	266	2.9	1182	14.87	391	4.83	344	3.94
BMK_Unigene_003962	5	0.13	6	0.19	23	0.72	10	0.31	16	0.58	3	0.09	18	0.49	3	0.09	93	2.16	52	1.39	18	0.47	22	0.53
BMK_Unigene_003963	267	4.78	291	5.32	177	3.79	178	3.82	175	4.33	290	6.25	266	4.93	211	4.51	488	7.74	174	3.18	298	5.34	327	5.42
BMK_Unigene_003964	200	2.6	181	2.41	82	1.27	123	1.93	145	2.63	139	2.18	348	4.7	548	8.52	297	3.42	346	4.6	277	3.61	278	3.36
BMK_Unigene_003965	59	1.85	102	3.31	75	2.82	89	3.38	98	4.28	88	3.36	116	3.78	61	2.28	100	2.79	195	6.26	203	6.4	105	3.07
BMK_Unigene_003967	10	2.39	8	1.96	1	0.28	0	0	0	0	0	0	6	1.45	0	0	7	1.53	1	0.24	0	0	2	0.43
BMK_Unigene_003968	89	2.39	125	3.44	127	4.08	130	4.23	48	1.79	121	3.95	754	21.07	532	17.05	497	11.89	582	15.99	569	15.33	518	12.93
BMK_Unigene_003970	3400	39.17	2816	33.25	2495	34.37	1692	23.44	2160	34.62	2162	30.09	8786	105.32	10542	145.43	3314	33.85	3659	43.16	4728	54.71	4259	45.69
BMK_Unigene_003972	14	0.34	13	0.33	2	0.06	4	0.12	15	0.5	0	0	61	1.54	45	1.3	89	1.92	100	2.5	47	1.14	27	0.63
BMK_Unigene_003973	0	0	0	0	0	0	0	0	0	0	0	0	0	0	16	3.19	0	0	3	0.52	3	0.51	1	0.16
BMK_Unigene_003978	35	2.48	13	0.95	5	0.42	10	0.86	0	0	5	0.43	18	1.32	7	0.58	0	0	0	0	3	0.21	3	0.2
BMK_Unigene_003981	693	8.78	467	6.07	454	6.89	519	7.92	480	8.46	525	8.05	359	4.73	357	5.41	559	6.29	428	5.55	483	6.15	751	8.86
BMK_Unigene_003982	1041	78.17	544	41.88	829	74.25	704	63.88	370	37.99	658	59.92	443	34.45	535	47.22	240	16.19	377	28.76	277	20.72	359	24.83
BMK_Unigene_003986	12	0.96	0	0	13	1.24	26	2.51	1	0.11	2	0.19	0	0	0	0	4	0.29	4	0.32	5	0.4	1	0.07
BMK_Unigene_003987	446	11.76	512	13.86	254	8	307	9.77	661	24.19	448	14.29	96	2.65	55	1.74	112	2.63	79	2.15	84	2.23	111	2.73
BMK_Unigene_003989	6012	685.69	1756	205.32	1044	141.81	1276	176.28	892	137.79	3027	419.72	277	32.61	307	40.7	274	28.21	666	76.75	241	27.24	442	46.14
BMK_Unigene_003990	9	0.42	2	0.09	24	1.33	4	0.22	26	1.66	35	1.96	3	0.14	0	0	2	0.08	3	0.14	4	0.19	4	0.17
BMK_Unigene_003996	0	0	0	0	0	0	0	0	9	2.24	1	0.23	0	0	0	0	0	0	0	0	0	0	0	0
BMK_Unigene_004003	420	4.72	788	9.06	309	4.15	226	3.05	559	8.72	458	6.21	268	3.13	305	4.1	125	1.25	246	2.83	231	2.61	483	5.05
BMK_Unigene_004008	1572	24.11	1967	30.92	1095	20.08	649	11.98	1610	34.32	927	17.18	872	13.91	579	10.62	592	8.06	670	10.52	685	10.55	559	7.98
BMK_Unigene_004009	24	2.25	14	1.35	3	0.33	0	0	11	1.4	0	0	8	0.77	7	0.77	0	0	3	0.28	0	0	5	0.43
BMK_Unigene_004014	28	2.38	21	1.83	15	1.52	20	2.06	8	0.93	6	0.62	0	0	1	0.1	29	2.21	9	0.78	13	1.1	6	0.47
BMK_Unigene_004017	0	0	0	0	2	0.06	12	0.34	0	0	3	0.09	139	3.34	74	2.06	104	2.14	408	9.65	179	4.15	204	4.39
BMK_Unigene_004019	19	0.79	38	1.62	17	0.84	0	0	11	0.63	8	0.4	4	0.17	3	0.15	62	2.31	6	0.25	39	1.62	45	1.73
BMK_Unigene_004022	9	0.9	3	0.31	5	0.59	4	0.48	26	3.52	7	0.85	2	0.21	3	0.35	8	0.72	17	1.71	5	0.49	1	0.09
BMK_Unigene_004023	0	0	7	1.95	0	0	3	1	0	0	0	0	0	0	0	0	1	0.25	2	0.54	0	0	0	0
BMK_Unigene_004030	2	0.38	1	0.2	5	1.13	12	2.79	4	1.02	3	0.7	0	0	0	0	0	0	0	0	0	0	0	0
BMK_Unigene_004034	30	0.48	22	0.36	7	0.13	16	0.32	13	0.29	7	0.14	20	0.33	4	0.08	140	1.99	44	0.72	20	0.32	27	0.4
BMK_Unigene_004040	382	10.71	517	14.83	239	7.99	483	16.27	226	8.77	289	9.81	31	0.91	67	2.25	13	0.34	12	0.37	34	0.97	20	0.54
BMK_Unigene_004041	2	0.05	22	0.41	10	0.23	15	0.33	0	0	0	0	189	3.58	103	2.24	542	8.73	387	7.19	334	6.1	282	4.77
BMK_Unigene_004046	317	4.9	401	6.36	160	2.98	27	0.5	507	10.92	90	1.68	65	1.05	58	1.08	115	1.59	48	0.76	42	0.67	76	1.09
BMK_Unigene_004047	17	1.87	6	0.67	14	1.85	18	2.39	0	0	0	0	0	0	0	0	0	0	0	0	0	0	16	1.61
BMK_Unigene_004050	127	2.32	69	1.29	96	2.1	106	2.33	57	1.45	63	1.39	3	0.06	1	0.02	11	0.18	12	0.22	2	0.04	12	0.2
BMK_Unigene_004054	0	0	0	0	3	0.73	0	0	0	0	0	0	0	0	0	0	1	0.19	5	1.03	0	0	10	1.85
BMK_Unigene_004055	3	0.07	5	0.12	7	0.19	79	2.16	6	0.19	18	0.49	37	0.87	11	0.3	41	0.83	59	1.37	29	0.66	457	9.65
BMK_Unigene_004061	772	42.05	901	50.3	655	42.58	471	30.94	695	52.14	525	34.64	822	46.41	692	44.61	1071	52.07	933	51.73	943	51.34	731	36.78
BMK_Unigene_004062	0	0	6	0.75	0	0	0	0	12	1.98	0	0	2	0.25	0	0	3	0.33	0	0	0	0	0	0
BMK_Unigene_004063	12	0.29	25	0.58	10	0.27	13	0.36	10	0.32	2	0.06	86	2.03	68	1.85	140	2.8	98	2.25	121	2.74	164	3.45
BMK_Unigene_004067	0	0	5	1.21	0	0	4	1.15	0	0	0	0	8	1.92	0	0	6	1.29	0	0	0	0	0	0
BMK_Unigene_004071	877	10.95	1052	13.47	563	8.41	545	8.2	995	17.3	779	11.75	811	10.55	709	10.6	743	8.23	681	8.71	608	7.63	783	9.11
BMK_Unigene_004072	166	1.98	223	2.73	48	0.69	88	1.26	238	3.96	119	1.72	417	5.18	561	8.01	531	5.61	1038	12.66	357	4.28	574	6.36
BMK_Unigene_004073	44	1.55	32	1.16	39	1.64	56	2.38	73	3.56	94	4.01	414	15.14	564	23.64	500	15.68	768	27.62	350	12.35	762	24.92
BMK_Unigene_004075	9	0.42	16	0.77	2	0.11	0	0	9	0.58	13	0.74	19	0.93	32	1.79	4	0.17	9	0.43	16	0.75	16	0.7
BMK_Unigene_004079	62	1.05	108	1.88	26	0.54	69	1.42	90	2.14	39	0.81	197	3.48	186	3.78	134	2.02	419	7.27	295	5.03	236	3.73
BMK_Unigene_004081	81	2.99	43	1.62	66	2.9	17	0.75	32	1.67	13	0.58	5	0.19	3	0.13	2	0.07	0	0	5	0.18	0	0
BMK_Unigene_004087	22	0.94	43	1.88	3	0.15	10	0.51	30	1.82	10	0.52	22	0.97	11	0.56	6	0.23	11	0.48	4	0.17	1	0.04
BMK_Unigene_004088	10	0.29	7	0.2	4	0.14	20	0.68	8	0.32	18	0.62	57	1.68	53	1.8	6	0.15	13	0.38	83	2.37	34	0.9
BMK_Unigene_004090	14	0.79	43	2.49	19	1.28	0	0	19	1.48	15	1.03	41	2.41	73	4.88	25	1.26	53	3.05	33	1.86	61	3.19
BMK_Unigene_004091	5	0.35	5	0.36	0	0	24	2.02	0	0	1	0.08	0	0	0	0	0	0	8	0.57	2	0.14	5	0.32
BMK_Unigene_004095	670	42.16	231	14.9	782	58.7	529	40.24	101	8.72	313	23.87	200	13.03	350	25.98	799	44.97	377	24.12	359	22.53	558	32.4
BMK_Unigene_004097	0	0	2	0.22	1	0.13	0	0	11	1.59	3	0.39	2	0.22	0	0	41	3.94	20	2.16	1	0.11	13	1.27
BMK_Unigene_004100	173	6.49	160	6.15	100	4.48	129	5.83	163	8.45	168	7.62	205	8.01	184	8.2	183	6.11	193	7.41	272	10.25	317	11.02
BMK_Unigene_004105	4	0.12	11	0.34	8	0.29	12	0.44	5	0.21	2	0.07	34	1.07	32	1.15	36	0.97	243	7.51	44	1.36	49	1.4
BMK_Unigene_004107	9	1.45	13	2.15	3	0.57	0	0	4	0.86	1	0.2	2	0.33	3	0.55	0	0	2	0.32	7	1.11	6	0.88
BMK_Unigene_004111	1309	18.55	790	11.48	1192	20.2	1143	19.49	532	10.5	929	15.92	44	0.66	66	1.13	91	1.15	62	0.91	36	0.52	91	1.21
BMK_Unigene_004113	9	0.95	30	3.35	13	1.64	18	2.3	37	5.37	12	1.54	25	2.72	0	0	14	1.33	17	1.82	16	1.68	12	1.16
BMK_Unigene_004115	442	7.47	486	8.42	350	7.09	680	13.84	336	7.91	464	9.48	45	0.8	52	1.05	79	1.19	106	1.85	93	1.58	79	1.25
BMK_Unigene_004117	453	16.55	297	11.12	356	15.56	251	11.04	125	6.31	366	16.18	245	9.29	145	6.3	281	9.16	261	9.73	346	12.65	297	10.06
BMK_Unigene_004118	2	0.42	0	0	0	0	5	1.27	0	0	0	0	0	0	12	2.84	0	0	0	0	0	0	0	0
BMK_Unigene_004125	519	31.12	411	25.23	365	26.1	318	23.03	225	18.58	476	34.58	335	20.82	260	18.44	542	29.01	343	20.94	332	19.88	399	22.09
BMK_Unigene_004127	11	2.99	0	0	0	0	0	0	0	0	0	0	0	0	0	0	0	0	2	0.54	0	0	0	0
BMK_Unigene_004133	0	0	2	0.27	0	0	0	0	6	1.08	0	0	8	1.1	12	1.85	2	0.24	3	0.4	2	0.26	1	0.12
BMK_Unigene_004135	7	0.26	11	0.41	3	0.13	6	0.26	23	1.19	0	0	24	0.91	3	0.13	14	0.46	201	7.54	17	0.62	30	1.02
BMK_Unigene_004139	212	4.04	318	6.19	204	4.63	344	7.87	124	3.28	692	15.88	1258	24.84	1526	34.63	544	9.17	1007	19.56	527	10.06	705	12.46
BMK_Unigene_004147	0	0	0	0	0	0	0	0	0	0	0	0	0	0	2	0.52	0	0	0	0	8	1.81	0	0
BMK_Unigene_004148	3	0.08	7	0.19	4	0.13	0	0	3	0.11	1	0.03	63	1.78	168	5.44	208	5.02	56	1.55	67	1.82	177	4.46
BMK_Unigene_004151	3413	83.77	2694	67.78	2437	71.49	3681	108.73	1241	42.22	2715	80.56	1986	50.67	1783	52.23	3771	82.24	1591	39.92	2207	54.32	1862	42.45
BMK_Unigene_004153	473	24.48	449	23.83	278	17.2	262	16.34	248	17.68	313	19.63	2	0.13	8	0.53	39	1.82	10	0.57	3	0.17	18	0.87
BMK_Unigene_004154	2900	71.72	2640	66.92	1881	55.61	2321	69.07	1776	60.91	2030	60.72	1299	33.41	1118	33.01	1761	38.71	1033	26.12	1285	31.87	1116	25.65
BMK_Unigene_004157	3343	55.11	3303	55.8	2950	58.14	4070	80.69	1934	44.29	4274	85.12	3849	66	2967	58.49	7186	105.1	5174	87.27	7946	131.47	4764	73.06
BMK_Unigene_004160	884	82.74	791	75.88	724	80.72	1055	119.47	803	102.31	920	104.56	989	95.51	739	80.87	1129	94.88	1130	107.09	1172	108.98	1460	125.4
BMK_Unigene_004163	391	3.62	548	5.2	284	3.14	218	2.43	628	8.09	317	3.54	385	3.71	337	3.74	510	4.18	282	2.68	359	3.34	525	4.53
BMK_Unigene_004175	0	0	3	0.6	0	0	3	0.71	6	1.56	2	0.48	2	0.4	0	0	0	0	10	1.95	3	0.57	0	0
BMK_Unigene_004176	1093	26.26	819	20.18	867	24.9	1009	29.17	676	22.52	745	21.64	541	13.52	435	12.47	1710	36.51	1279	31.44	900	21.7	1036	23.13
BMK_Unigene_004177	0	0	0	0	0	0	0	0	0	0	0	0	7	1.86	0	0	1	0.24	0	0	0	0	0	0
BMK_Unigene_004185	1019	43.31	873	38.04	698	35.41	827	42.39	445	26.12	1048	53.94	1260	55.53	848	42.79	2232	84.52	2543	110.2	1837	78.11	1795	70.63
BMK_Unigene_004186	0	0	4	0.19	9	0.48	3	0.16	0	0	11	0.58	18	0.83	10	0.57	57	2.22	14	0.65	24	1.09	29	1.2
BMK_Unigene_004189	2555	113.46	3059	139.18	1919	101.73	2748	147.05	627	38.44	2490	133.84	24	1.14	0	0	145	5.75	151	6.87	40	1.81	87	3.6
BMK_Unigene_004190	0	0	0	0	0	0	10	3.05	0	0	0	0	0	0	0	0	0	0	0	0	3	0.73	0	0
BMK_Unigene_004192	445	13.74	294	9.32	335	12.38	274	10.21	259	11.07	354	13.23	82	2.63	52	1.92	18	0.52	96	3.03	118	3.65	64	1.84
BMK_Unigene_004195	2533	27.69	1855	20.78	1267	16.57	1033	13.58	1478	22.49	1063	14.04	1594	18.14	1680	22	2851	27.63	2424	27.14	1918	21.06	2191	22.31
BMK_Unigene_004196	6	0.21	13	0.47	2	0.08	74	3.17	0	0	0	0	0	0	0	0	0	0	0	0	0	0	0	0
BMK_Unigene_004198	2	0.09	1	0.04	0	0	0	0	13	0.76	0	0	5	0.26	344	17.41	9	0.34	21	0.91	4	0.17	257	10.14
BMK_Unigene_004200	0	0	0	0	0	0	0	0	2	0.85	0	0	0	0	7	2.53	0	0	0	0	0	0	0	0
BMK_Unigene_004201	139	13.32	295	28.97	39	4.45	104	12.1	278	36.24	229	26.71	238	23.51	222	24.84	44	3.78	36	3.49	35	3.33	138	12.12
BMK_Unigene_004203	35	0.94	67	1.84	9	0.29	14	0.45	17	0.63	16	0.52	0	0	11	0.35	12	0.29	0	0	6	0.16	8	0.2
BMK_Unigene_004205	1495	32.33	1361	30.17	1352	34.95	721	18.78	1137	34.11	1399	36.57	1595	35.84	1218	31.45	1278	24.54	1157	25.59	1768	38.35	1614	32.45
BMK_Unigene_004206	147	2.49	329	5.68	90	1.82	43	0.88	431	10.11	91	1.86	69	1.22	94	1.9	32	0.49	33	0.57	78	1.34	66	1.04
BMK_Unigene_004207	32	0.78	14	0.35	8	0.23	26	0.76	127	4.28	6	0.18	0	0	3	0.09	0	0	0	0	7	0.17	27	0.61
BMK_Unigene_004208	35	0.8	17	0.4	4	0.11	40	1.12	29	0.93	32	0.89	258	6.15	274	7.49	355	7.22	556	13.01	349	8.01	364	7.74
BMK_Unigene_004209	227	6.32	342	9.72	184	6.12	167	5.6	261	10.02	170	5.7	378	10.88	219	7.24	606	14.93	448	12.69	352	9.78	379	9.75
BMK_Unigene_004210	2	0.32	0	0	0	0	0	0	1	0.21	0	0	1	0.16	5	0.91	0	0	12	1.9	1	0.16	7	1
BMK_Unigene_004211	3429	46.05	3691	50.8	3502	56.22	3438	55.52	2410	45	3284	53.27	9723	135.82	9082	145.95	7213	85.89	20391	280.25	12967	174.82	17041	212.97
BMK_Unigene_004213	55	2.7	179	9.07	51	3	44	2.61	72	4.88	91	5.42	128	6.52	56	3.26	100	4.38	76	3.84	118	5.8	68	3.14
BMK_Unigene_004214	2588	178.51	1553	109.82	1911	157.14	1760	146.5	1043	98.53	1797	150.25	1305	93.08	717	58.22	614	37.87	576	40.4	574	39.45	956	60.73
BMK_Unigene_004216	0	0	1	0.05	1	0.06	178	11.52	0	0	10	0.65	3	0.17	2	0.13	5	0.24	122	6.65	0	0	6	0.3
BMK_Unigene_004217	4	0.37	0	0	2	0.22	125	14.03	1	0.13	9	1.01	1	0.1	3	0.33	11	0.92	97	9.12	0	0	8	0.68
BMK_Unigene_004218	1778	101.86	1505	88.41	1071	73.21	867	59.91	1146	90.31	1025	71.14	1569	93.14	1763	119.4	2044	104.6	1284	74.84	1422	81.32	1121	59.3
BMK_Unigene_004219	5	0.06	5	0.06	1	0.01	0	0	2	0.03	3	0.04	403	4.72	283	3.82	729	7.27	297	3.43	526	5.95	486	5.09
BMK_Unigene_004220	303	3.97	131	1.76	65	1.03	71	1.13	218	3.96	44	0.7	999	13.56	926	14.46	1777	20.56	1472	19.66	1217	15.95	1194	14.51
BMK_Unigene_004221	6	0.86	2	0.29	3	0.51	13	2.26	0	0	0	0	4	0.59	0	0	0	0	12	1.73	12	1.69	7	0.91
BMK_Unigene_004227	424	6.97	398	6.71	382	7.51	203	4.03	394	9.01	490	9.73	275	4.71	155	3.06	550	8.02	379	6.38	208	3.44	443	6.77
BMK_Unigene_004228	154	10.39	100	6.92	105	8.45	91	7.41	70	6.48	91	7.45	30	2.12	0	0.07	77	4.7	40	2.77	9	0.61	6	0.42
BMK_Unigene_004229	21	0.94	29	1.31	4	0.2	20	1.05	47	2.83	16	0.83	4	0.18	10	0.51	1	0.04	5	0.22	0	0	4	0.16
BMK_Unigene_004234	2472	40.64	2855	48.1	1925	37.84	1881	37.18	1651	37.7	2373	47.14	2987	51.06	1856	36.48	2587	37.73	2252	37.88	3094	51.04	2558	39.13
BMK_Unigene_004235	6055	140.58	3974	94.55	10428	289.33	23312	651.2	2081	67.01	11320	317.67	4549	109.76	3916	108.51	10847	223.68	12935	306.97	7511	174.87	11138	240.25
BMK_Unigene_004238	58	1.14	67	1.35	37	0.87	93	2.21	71	1.95	70	1.66	28	0.57	73	1.73	223	3.89	270	5.42	166	3.26	247	4.5
BMK_Unigene_004240	38	1.03	24	0.68	5	0.16	23	0.75	6	0.24	3	0.1	75	2.12	167	5.38	417	10.02	127	3.53	118	3.2	143	3.59
BMK_Unigene_004246	96	10.21	22	2.38	25	3.15	30	3.84	37	5.31	51	6.55	12	1.31	17	2.12	13	1.25	47	5.05	49	5.2	18	1.79
BMK_Unigene_004255	213	3.35	179	2.89	90	1.7	40	0.77	265	5.8	112	2.13	35	0.58	26	0.49	34	0.48	52	0.85	64	1.01	57	0.84
BMK_Unigene_004256	115	3.56	148	4.67	562	20.67	156	5.78	95	4.08	219	8.15	78	2.51	26	0.97	31	0.86	55	1.73	69	2.13	54	1.56
BMK_Unigene_004257	1543	18.54	380	4.68	674	9.69	2264	32.72	337	5.63	835	12.13	113	1.42	56	0.81	66	0.71	756	9.31	154	1.86	41	0.46
BMK_Unigene_004259	1830	26.17	2967	43.47	256	4.38	710	12.21	1724	34.28	876	15.13	781	11.62	1029	17.62	395	5.01	327	4.78	554	7.95	1163	15.47
BMK_Unigene_004260	8	0.33	3	0.13	2	0.1	3	0.15	8	0.46	0	0	7	0.3	0	0	48	1.76	406	17.08	22	0.92	37	1.41
BMK_Unigene_004261	4	0.36	9	0.89	27	2.89	29	3.07	4	0.48	6	0.64	5	0.45	0	0	26	2.04	34	3.01	20	1.74	14	1.12
BMK_Unigene_004266	0	0	18	0.63	3	0.12	13	0.55	0	0	5	0.21	138	4.93	1	0.04	113	3.49	114	4	15	0.55	47	1.5
BMK_Unigene_004267	0	0	2	0.21	0	0	7	0.87	13	1.81	4	0.5	2	0.21	1	0.12	18	1.66	15	1.55	2	0.2	11	1.03
BMK_Unigene_004268	3	0.63	6	1.3	0	0	0	0	7	1.96	0	0	4	0.86	0	0	0	0	0	0	0	0	0	0
BMK_Unigene_004269	790	36.5	1533	72.64	459	25.32	228	12.7	738	47	694	38.82	1129	54.09	856	46.91	366	15.07	138	6.5	885	40.88	835	35.7
BMK_Unigene_004274	6	0.76	9	1.28	0	0	1	0.15	3	0.51	4	0.62	12	1.56	20	2.92	1	0.11	0	0	1	0.12	13	1.49
BMK_Unigene_004277	132	4.95	167	6.42	8	0.36	80	3.62	72	3.73	15	0.68	0	0	0	0	3	0.1	8	0.31	5	0.19	11	0.38
BMK_Unigene_004278	902	21.69	909	22.41	525	15.1	562	16.26	312	10.43	468	13.6	595	14.89	456	13.09	266	5.7	253	6.24	421	10.15	471	10.53
BMK_Unigene_004286	97	3.95	92	3.86	54	2.63	19	0.98	126	7.09	68	3.4	130	5.5	136	6.58	137	4.97	93	3.86	108	4.4	139	5.25
BMK_Unigene_004287	282	4.48	257	4.19	69	1.32	41	0.78	73	1.61	113	2.18	283	4.69	545	10.36	58	0.83	67	1.1	366	5.84	135	2
BMK_Unigene_004288	50	2.02	41	1.7	8	0.39	6	0.29	30	1.68	17	0.83	10	0.42	2	0.1	35	1.26	9	0.37	20	0.81	1	0.04
BMK_Unigene_004289	33	2.11	18	1.18	7	0.53	8	0.69	21	1.84	11	0.85	1	0.07	3	0.23	1	0.06	6	0.39	2	0.13	10	0.59
BMK_Unigene_004292	902	46.58	506	26.78	811	50.03	706	43.95	394	28	780	48.77	636	34.06	409	25	1275	58.77	1133	59.58	1035	53.4	1003	47.91
BMK_Unigene_004294	307	25	144	12.08	153	14.85	120	11.89	23	2.56	165	16.3	259	21.85	363	34.7	413	30.2	83	6.85	387	31.4	303	22.72
BMK_Unigene_004295	271	4.15	47	0.74	46	0.84	53	0.97	54	1.15	77	1.42	0	0	7	0.13	10	0.14	14	0.22	3	0.05	10	0.14
BMK_Unigene_004296	1169	16.2	1126	16	675	11.19	448	7.47	1138	21.93	674	11.3	201	2.9	287	4.77	366	4.5	180	2.57	163	2.27	465	6
BMK_Unigene_004297	344	5.85	389	6.78	194	3.94	227	4.65	309	7.31	177	3.64	192	3.4	219	4.47	199	3	210	3.67	279	4.76	411	6.51
BMK_Unigene_004298	171	9.7	148	8.63	58	3.93	34	2.34	97	7.56	68	4.71	73	4.3	85	5.72	58	2.96	55	3.18	70	3.98	142	7.47
BMK_Unigene_004301	19	0.5	6	0.15	13	0.39	12	0.36	21	0.72	20	0.6	28	0.72	24	0.71	59	1.3	81	2.05	88	2.19	43	0.99
BMK_Unigene_004302	0	0	2	0.18	0	0	0	0	2	0.24	0	0	13	1.17	44	4.48	2	0.16	11	0.97	8	0.69	13	1.04
BMK_Unigene_004303	51	1.1	18	0.39	25	0.63	19	0.48	28	0.82	26	0.66	137	3.03	62	1.58	35	0.67	74	1.6	110	2.35	58	1.14
BMK_Unigene_004305	446	5.46	244	3.05	564	8.25	673	9.88	254	4.33	386	5.7	384	4.88	262	3.84	665	7.21	501	6.27	388	4.76	404	4.6
BMK_Unigene_004306	1	0.1	2	0.21	1	0.12	0	0	16	2.26	5	0.63	0	0	1	0.12	0	0	0	0	0	0	0	0
BMK_Unigene_004309	169	17.03	596	61.55	62	7.44	25	3.05	25	3.42	124	15.19	81	8.42	125	14.7	501	45.38	81	8.25	35	3.5	112	10.34
BMK_Unigene_004312	352	6.15	405	7.25	257	5.37	247	5.18	364	8.82	358	7.55	337	6.13	304	6.35	260	4.03	324	5.78	325	5.69	451	7.32
BMK_Unigene_004319	0	0	4	1.34	6	2.31	0	0	3	1.27	1	0.4	1	0.33	0	0	0	0	0	0	3	0.94	1	0.29
BMK_Unigene_004321	32	0.64	93	1.9	4	0.1	6	0.14	69	1.91	5	0.12	7	0.15	0	0	6	0.11	14	0.29	3	0.06	0	0
BMK_Unigene_004323	1128	21.01	3218	61.4	658	14.66	792	17.75	1657	42.83	1498	33.69	2406	46.59	1561	34.74	606	10.03	1948	37.09	2032	37.96	2445	42.32
BMK_Unigene_004328	28	0.94	14	0.48	4	0.17	2	0.08	54	2.51	7	0.28	9	0.34	14	0.59	16	0.48	2	0.09	12	0.42	9	0.3
BMK_Unigene_004330	42	1.15	76	2.15	9	0.29	36	1.18	72	2.73	14	0.46	68	1.93	44	1.45	74	1.8	99	2.77	122	3.34	86	2.18
BMK_Unigene_004332	167	4.49	149	4.12	105	3.39	53	1.73	123	4.57	111	3.61	21	0.6	17	0.55	38	0.92	32	0.88	35	0.97	47	1.17
BMK_Unigene_004337	0	0	0	0	2	0.54	0	0	0	0	6	1.67	6	1.38	11	2.81	2	0.41	1	0.23	0	0	1	0.2
BMK_Unigene_004346	0	0	0	0	0	0	0	0	2	0.53	0	0	0	0	0	0	2	0.36	11	2.17	0	0	0	0
BMK_Unigene_004347	0	0	0	0	0	0	0	0	0	0	4	0.35	12	0.91	21	1.81	21	1.38	25	1.86	59	4.3	21	1.41
BMK_Unigene_004351	582	27.12	935	44.62	8	0.45	7	0.39	1557	99.94	0	0	87	4.2	475	26.25	7	0.33	29	1.41	28	1.35	38	1.67
BMK_Unigene_004353	167	14.44	108	9.57	103	10.61	161	16.82	129	15.21	191	20.04	220	19.64	102	10.33	381	29.6	702	61.5	445	38.32	343	27.23
BMK_Unigene_004354	10	3.26	0	0	1	0.39	0	0	0	0	4	1.61	51	16.73	11	3.93	16	4.82	23	7.37	32	10.06	51	14.67
BMK_Unigene_004356	4319	71.94	15171	258.94	19014	378.56	18246	365.47	1384	32.04	26493	533.09	14406	249.52	7535	150.06	23250	343.59	13369	227.8	21384	357.44	25331	392.44
BMK_Unigene_004359	2279	12.89	1978	11.47	1617	10.94	1583	10.76	1745	13.76	1530	10.45	1428	8.41	1179	8	2551	12.78	1917	11.11	1929	10.97	1650	8.7
BMK_Unigene_004366	4	0.13	3	0.08	4	0.13	0	0	6	0.23	4	0.13	144	4.11	217	7.09	151	3.7	87	2.43	65	1.81	187	4.76
BMK_Unigene_004373	1271	18.86	1207	18.35	207	3.68	65	1.17	708	14.61	92	1.65	1184	18.27	2969	52.71	178	2.35	89	1.35	632	9.43	297	4.1
BMK_Unigene_004374	7	0.22	0	0	0	0	0	0	0	0	0	0	20	0.66	37	1.39	7	0.2	14	0.45	90	2.85	64	1.88
BMK_Unigene_004381	7	0.91	18	2.39	4	0.62	71	11.28	4	0.7	8	1.26	0	0	0	0	1	0.12	20	2.61	0	0	116	13.72
BMK_Unigene_004384	0	0	0	0	10	0.41	0	0	0	0	0	0	63	2.26	122	5.02	81	2.5	0	0	92	3.19	108	3.47
BMK_Unigene_004396	0	0	1	0.31	0	0	0	0	0	0	6	2.25	7	2.15	0	0	5	1.4	4	1.2	2	0.59	8	2.16
BMK_Unigene_004397	2	0.38	0	0	0	0	0	0	10	2.5	0	0	0	0	0	0	0	0	1	0.19	3	0.55	0	0
BMK_Unigene_004399	16	2.7	5	0.86	4	0.8	1	0.2	2	0.45	2	0.41	0	0	0	0	2	0.31	0	0	6	0.99	4	0.61
BMK_Unigene_004400	0	0	6	0.59	2	0.23	1	0.12	2	0.26	0	0	7	0.7	29	3.28	7	0.61	12	1.17	1	0.1	8	0.71
BMK_Unigene_004403	0	0	0	0	0	0	0	0	3	0.91	0	0	1	0.23	1	0.26	3	0.63	25	5.73	0	0	12	2.48
BMK_Unigene_004407	100	19.3	143	28.49	61	14.11	84	19.71	74	19	36	8.49	77	15.2	72	15.78	31	5.44	19	3.76	68	12.86	61	10.76
BMK_Unigene_004412	0	0	1	0.25	0	0	0	0	0	0	0	0	0	0	8	2.2	3	0.67	1	0.24	0	0	3	0.66
BMK_Unigene_004414	0	0	0	0	0	0	8	2.59	0	0	2	0.65	7	1.88	0	0	2	0.49	0	0	0	0	0	0
BMK_Unigene_004415	28	0.83	24	0.76	20	0.71	37	1.32	31	1.27	20	0.72	85	2.63	54	1.94	192	5.09	114	3.48	88	2.63	98	2.72
BMK_Unigene_004421	0	0	0	0	1	0.05	1	0.05	2	0.12	0	0	217	9.61	75	3.81	128	4.88	359	15.65	218	9.34	210	8.34
BMK_Unigene_004428	2	0.1	1	0.05	1	0.06	6	0.36	4	0.27	0	0	7	0.36	27	1.58	13	0.57	28	1.41	12	0.59	41	1.88
BMK_Unigene_004429	72	5.46	60	4.66	56	5.06	120	10.99	5	0.52	88	8.1	11	0.86	0	0	5	0.34	1	0.08	1	0.08	10	0.7
BMK_Unigene_004433	144	2.65	211	3.98	86	1.9	119	2.63	154	3.93	209	4.64	1015	19.36	687	15.06	2942	47.87	1631	30.6	1896	34.89	2451	41.79
BMK_Unigene_004437	65	2.93	27	1.29	18	0.98	6	0.33	12	0.74	12	0.66	191	8.93	224	12	85	3.42	36	1.69	70	3.18	80	3.34
BMK_Unigene_004438	3	0.84	0	0	0	0	0	0	20	7.3	0	0	3	0.85	0	0	0	0	0	0	1	0.27	0	0
BMK_Unigene_004441	4	0.88	0	0	5	1.31	0	0	6	1.75	0	0	2	0.45	1	0.25	13	2.61	0	0	0	0	0	0
BMK_Unigene_004442	608	10.95	190	3.52	1177	25.3	3641	78.74	88	2.21	1053	22.89	10	0.19	16	0.36	4	0.07	117	2.17	15	0.27	39	0.66
BMK_Unigene_004445	0	0	8	0.3	4	0.18	8	0.35	2	0.1	7	0.31	87	3.32	0	0	0	0	15	0.56	20	0.74	0	0
BMK_Unigene_004448	9	0.63	117	8.45	13	1.09	178	15.17	42	4.13	14	1.22	220	16.07	62	5.21	343	21.63	467	33.39	89	6.28	38	2.52
BMK_Unigene_004451	58	3.78	91	6.08	29	2.26	78	6.14	26	2.33	86	6.8	38	2.56	103	7.92	62	3.62	134	8.88	84	5.46	121	7.33
BMK_Unigene_004452	0	0	6	2.01	0	0	0	0	8	3.38	0	0	0	0	0	0	0	0	0	0	0	0	0	0
BMK_Unigene_004456	5	1.1	10	2.25	15	3.9	3	0.8	0	0	1	0.27	0	0	0	0	0	0	0	0	1	0.21	0	0
BMK_Unigene_004463	29	5.19	18	3.3	0	0	0	0	33	7.88	0	0	0	0	0	0	0	0	0	0	1	0.18	0	0
BMK_Unigene_004464	0	0	0	0	0	0	0	0	9	1.93	0	0	1	0.16	0	0	0	0	0	0	0	0	2	0.29
BMK_Unigene_004468	5	1.89	1	0.39	0	0	0	0	4	1.94	0	0	0	0	0	0	0	0	3	1.11	0	0	0	0
BMK_Unigene_004469	4	1.22	0	0	0	0	0	0	0	0	0	0	0	0	3	1.01	0	0	0	0	8	2.36	0	0
BMK_Unigene_004470	861	7.34	112	0.98	129	1.31	43	0.44	1788	21.2	260	2.67	6	0.05	8	0.08	63	0.48	91	0.79	11	0.09	160	1.27
BMK_Unigene_004473	22	0.73	0	0	103	4.08	0	0	1	0.05	0	0	0	0	1	0.04	1	0.03	4	0.14	0	0	0	0
BMK_Unigene_004474	3	1.13	9	3.49	8	3.56	0	0	1	0.48	2	0.93	0	0	0	0	0	0	0	0	0	0	0	0
BMK_Unigene_004476	71	1.43	48	1	32	0.77	28	0.68	16	0.46	47	1.14	447	9.29	631	15.05	202	3.58	248	5.07	352	7.06	218	4.06
BMK_Unigene_004477	77	3.47	51	2.35	32	1.72	10	0.54	38	2.36	25	1.36	13	0.61	4	0.21	3	0.12	3	0.18	1	0.05	10	0.42
BMK_Unigene_004482	158	5.11	224	7.43	62	2.39	38	1.48	393	17.59	51	1.99	5	0.18	0	0.03	18	0.54	14	0.49	12	0.42	2	0.09
BMK_Unigene_004483	0	0	0	0	0	0	0	0	0	0	0	0	0	0	14	5.3	4	1.28	1	0.34	0	0	5	1.52
BMK_Unigene_004485	0	0	1	0.34	0	0	0	0	4	1.73	0	0	6	2.01	0	0	0	0	0	0	0	0	0	0
BMK_Unigene_004490	7	1.46	0	0	4	0.99	0	0	7	1.93	0	0	0	0	7	1.65	0	0	0	0	3	0.61	0	0
BMK_Unigene_004492	22	4.15	27	5.22	1	0.22	27	6.19	10	2.51	2	0.46	3	0.58	7	1.5	6	1.03	13	2.45	12	2.22	7	1.19
BMK_Unigene_004496	141	1.96	70	0.99	86	1.43	77	1.28	143	2.74	88	1.47	206	2.96	239	3.95	144	1.76	284	4.01	230	3.2	405	5.21
BMK_Unigene_004498	4	0.3	3	0.23	0	0	0	0	2	0.2	1	0.09	1	0.08	6	0.53	14	0.94	14	1.06	5	0.37	32	2.2
BMK_Unigene_004501	154	4.95	42	1.38	28	1.07	32	1.24	63	2.8	63	2.45	21	0.7	11	0.42	2	0.06	18	0.59	6	0.19	8	0.24
BMK_Unigene_004502	2	0.09	0	0	0	0	0	0	5	0.32	0	0	13	0.63	15	0.83	74	3.09	7	0.33	35	1.64	35	1.52
BMK_Unigene_004506	5	1.03	0	0	9	2.2	0	0	0	0	0	0	7	1.47	2	0.47	0	0	0	0	0	0	0	0
BMK_Unigene_004507	7	1.96	0	0	6	1.99	0	0	0	0	0	0	0	0	0	0	0	0	0	0	0	0	0	0
BMK_Unigene_004511	7	0.17	14	0.35	13	0.38	4	0.12	101	3.4	38	1.11	5	0.13	10	0.29	0	0	2	0.05	2	0.05	5	0.11
BMK_Unigene_004512	0	0	0	0	0	0	0	0	0	0	7	2.13	0	0	0	0	3	0.68	0	0	0	0	2	0.44
BMK_Unigene_004516	12	1.52	0	0	3	0.45	14	2.15	3	0.51	4	0.62	4	0.52	0	0	0	0	0	0	0	0	3	0.35
BMK_Unigene_004519	12	2.55	0	0	0	0	0	0	0	0	0	0	0	0	0	0	2	0.39	0	0	2	0.42	4	0.76
BMK_Unigene_004520	33	0.75	55	1.27	44	1.17	4	0.11	59	1.83	46	1.24	101	2.36	40	1.08	30	0.61	138	3.14	68	1.54	57	1.19
BMK_Unigene_004524	205	4.96	3	0.07	196	5.67	1748	50.91	2	0.07	54	1.58	7	0.18	0	0	1	0.02	14	0.37	0	0	3	0.07
BMK_Unigene_004525	0	0	0	0	4	1.9	0	0	2	1.03	0	0	0	0	3	1.3	2	0.75	0	0	0	0	0	0
BMK_Unigene_004528	417	4.95	550	6.7	314	4.46	270	3.86	339	5.6	316	4.54	2	0.03	3	0.05	0	0	2	0.03	3	0.04	0	0
BMK_Unigene_004534	129	6.3	96	4.8	79	4.6	121	7.12	35	2.35	106	6.27	199	10.07	228	13.19	490	21.34	426	21.19	248	12.11	198	8.94
BMK_Unigene_004537	36	1.47	79	3.31	19	0.93	7	0.34	34	1.92	10	0.49	46	1.96	24	1.17	14	0.55	41	1.71	27	1.1	14	0.53
BMK_Unigene_004538	3	0.52	0	0	0	0	9	1.9	0	0	2	0.42	0	0	8	1.59	6	0.94	1	0.17	0	0	2	0.31
BMK_Unigene_004539	44	2.84	0	0	2	0.15	0	0	2	0.18	0	0	2	0.13	0	0	0	0.03	0	0	4	0.26	2	0.12
BMK_Unigene_004541	0	0	0	0	0	0	0	0	1	0.05	0	0	9	0.31	8	0.31	28	0.82	205	6.87	32	1.05	14	0.43
BMK_Unigene_004542	83	4.26	71	3.69	32	1.94	77	4.77	28	2.03	64	3.93	962	50.64	321	19.34	438	19.88	217	11.22	1225	62.14	105	4.96
BMK_Unigene_004547	17	1	23	1.38	2	0.14	0	0	38	3.14	4	0.28	2	0.12	5	0.35	0	0	0	0	0	0	0	0
BMK_Unigene_004548	820	20	185	4.63	103	3.01	67	1.99	186	6.32	115	3.39	91	2.33	41	1.22	31	0.67	50	1.26	21	0.52	56	1.28
BMK_Unigene_004555	12	1.36	9	1.05	3	0.41	8	1.1	10	1.54	24	3.31	18	2.14	0	0	28	2.88	0	0	18	2.13	22	2.3
BMK_Unigene_004558	1737	30.47	1812	32.59	992	20.82	735	15.52	1663	40.53	1429	30.29	539	9.84	318	6.69	201	3.13	86	1.55	423	7.46	390	6.37
BMK_Unigene_004560	5240	75.07	3445	50.57	8443	144.61	5399	93.01	2496	49.71	6663	115.3	7241	107.91	4474	76.69	8771	111.46	9082	133.16	7278	104.68	11965	159.52
BMK_Unigene_004565	21	3.58	2	0.35	1	0.2	0	0	2	0.46	0	0	0	0	0	0	0	0	0	0	0	0	2	0.31
BMK_Unigene_004567	186	2.4	250	3.29	241	3.7	182	2.81	177	3.16	331	5.13	2018	26.93	1585	24.34	2720	30.94	2807	36.86	2773	35.73	2349	28.06
BMK_Unigene_004575	1	0.34	0	0	4	1.61	0	0	8	3.52	0	0	1	0.34	0	0	8	2.52	0	0	4	1.31	0	0
BMK_Unigene_004579	654	7.94	793	9.86	424	6.16	600	8.75	432	7.3	498	7.3	1022	12.9	1217	17.67	950	10.22	798	9.91	1044	12.72	1232	13.91
BMK_Unigene_004581	0	0	0	0	0	0	4	1.18	0	0	0	0	0	0	0	0	2	0.44	14	3.36	3	0.71	5	1.08
BMK_Unigene_004583	4	0.14	18	0.65	10	0.42	0	0	1	0.05	0	0	30	1.09	20	0.83	24	0.75	7	0.25	60	2.1	14	0.45
BMK_Unigene_004585	2	0.69	2	0.7	6	2.43	10	4.21	0	0	1	0.42	0	0	0	0	0	0	0	0	6	1.98	0	0
BMK_Unigene_004591	101	1.4	93	1.32	149	2.47	45	0.75	163	3.16	50	0.84	65	0.95	66	1.1	214	2.63	488	6.92	61	0.86	298	3.84
BMK_Unigene_004597	139	24.64	136	24.72	90	18.94	239	51.68	96	22.72	169	36.76	285	51.63	69	13.96	458	73.84	493	87.62	585	101.83	372	59.56
BMK_Unigene_004598	0	0	0	0	0	0	0	0	2	0.62	0	0	0	0	7	1.83	0	0	0	0	3	0.68	0	0
BMK_Unigene_004603	0	0	3	0.55	0	0	0	0	12	2.87	0	0	0	0	0	0	3	0.49	4	0.72	0	0	0	0
BMK_Unigene_004604	14	1.88	0	0	0	0	8	1.31	0	0	2	0.33	4	0.55	0	0	0	0	0	0	0	0	0	0
BMK_Unigene_004605	56	1.6	37	1.08	24	0.82	85	2.92	33	1.31	21	0.73	0	0	13	0.44	4	0.1	0	0	8	0.23	14	0.4
BMK_Unigene_004606	19	0.55	17	0.5	97	3.34	3	0.1	1	0.04	10	0.35	0	0	0	0	0	0	0	0	0	0	4	0.11
BMK_Unigene_004607	62	1.62	17	0.46	66	2.06	43	1.35	23	0.83	40	1.26	8	0.22	12	0.37	6	0.14	21	0.56	8	0.21	45	1.09
BMK_Unigene_004608	0	0	4	0.56	0	0	0	0	0	0	0	0	0	0	0	0	0	0	0	0	0	0	19	2.36
BMK_Unigene_004610	882	26.43	4110	126.18	1388	49.69	2744	98.95	541	22.45	3426	124.13	7256	225.74	12239	436.68	532	14.19	1592	48.71	1803	54.12	567	15.76
BMK_Unigene_004614	46	2.54	37	2.12	11	0.78	13	0.87	8	0.63	4	0.3	191	10.89	135	8.81	209	10.27	164	9.18	189	10.38	121	6.17
BMK_Unigene_004615	58	1.56	75	2.07	21	0.71	21	0.68	61	2.27	20	0.65	12	0.34	11	0.35	5	0.12	0	0	6	0.16	18	0.45
BMK_Unigene_004623	946	22.6	753	18.42	603	17.2	651	18.7	590	19.53	725	20.94	758	18.81	658	18.76	869	18.43	929	22.67	854	20.44	861	19.09
BMK_Unigene_004625	0	0	4	0.2	0	0	0	0	14	0.93	0	0	24	1.2	32	1.82	17	0.73	26	1.27	44	2.11	30	1.33
BMK_Unigene_004628	34	5.13	44	6.93	8	1.43	6	1.1	27	5.63	1	0.18	5	0.77	6	1.04	0	0	5	0.76	4	0.59	2	0.41
BMK_Unigene_004629	14	3.36	0	0	0	0	0	0	0	0	0	0	3	0.73	0	0	9	1.97	7	1.67	0	0	0	0
BMK_Unigene_004631	0	0	0	0	0	0	4	0.32	0	0	0	0	0	0	4	0.31	7	0.41	1	0.07	0	0	37	2.26
BMK_Unigene_004633	0	0	0	0	2	0.51	0	0	3	0.86	0	0	0	0	0	0	1	0.2	9	1.94	0	0	0	0
BMK_Unigene_004636	9	0.92	0	0	1	0.12	28	3.48	0	0	0	0	0	0	0	0	0	0	0	0	0	0	1	0.09
BMK_Unigene_004639	0	0	0	0	0	0	0	0	2	0.3	0	0	2	0.23	5	0.64	22	2.16	5	0.55	3	0.33	0	0
BMK_Unigene_004641	16	1.13	0	0	1	0.08	35	2.99	16	1.55	20	1.72	0	0	6	0.5	0	0	0	0	0	0	3	0.2
BMK_Unigene_004642	0	0	1	0.03	0	0	6	0.24	3	0.12	1	0.03	220	6.6	153	5.25	47	1.2	22	0.67	29	0.86	212	5.67
BMK_Unigene_004644	0	0	0	0	2	0.75	0	0	0	0	5	1.96	1	0.32	0	0	0	0	0	0	0	0	2	0.56
BMK_Unigene_004646	110	2.46	92	2.1	103	2.75	72	1.94	112	3.46	125	3.38	13	0.31	22	0.6	7	0.14	51	1.16	62	1.39	33	0.68
BMK_Unigene_004650	390	7.77	382	7.8	255	6.08	319	7.65	259	7.17	332	7.99	589	12.19	386	9.17	894	15.8	831	16.92	779	15.56	712	13.17
BMK_Unigene_004651	998	9.51	1113	10.87	522	5.95	415	4.75	951	12.62	590	6.79	1546	15.34	1666	19.03	1681	14.2	1555	15.18	1697	16.25	1777	15.77
BMK_Unigene_004652	6	0.6	0	0	0	0	0	0	4	0.54	0	0	4	0.41	0	0	27	2.43	2	0.2	2	0.2	0	0
BMK_Unigene_004653	954	19.5	1017	21.29	669	16.35	749	18.42	692	19.61	938	23.18	201	4.27	168	4.11	244	4.44	134	2.8	193	3.96	184	3.51
BMK_Unigene_004658	2	0.12	0	0	0	0	1	0.07	0	0	2	0.15	107	6.84	176	12.82	6	0.33	29	1.88	68	4.19	9	0.51
BMK_Unigene_004659	0	0	0	0	0	0	0	0	6	2.25	0	0	0	0	4	1.27	0	0	0	0	0	0	2	0.51
BMK_Unigene_004660	0	0	0	0	3	0.99	0	0	0	0	0	0	0	0	11	3.39	0	0	0	0	0	0	0	0
BMK_Unigene_004662	1976	40.88	1435	30.43	1540	38.08	1489	37.07	1037	29.79	1662	41.56	1164	25.05	878	21.7	1545	28.38	1046	22.15	1727	35.85	1190	22.89
BMK_Unigene_004668	61	3.84	123	7.94	12	0.9	30	2.3	55	4.76	23	1.76	116	7.62	45	3.34	12	0.68	22	1.41	50	3.14	45	2.61
BMK_Unigene_004671	6	0.75	3	0.38	0	0	0	0	1	0.17	0	0	6	0.77	2	0.29	17	1.92	5	0.63	2	0.25	1	0.11
BMK_Unigene_004673	0	0	0	0	0	0	0	0	0	0	6	1.98	0	0	0	0	0	0	0	0	3	0.78	0	0
BMK_Unigene_004677	0	0	2	0.81	0	0	0	0	0	0	0	0	5	1.96	0	0	0	0	7	2.67	1	0.37	3	1.03
BMK_Unigene_004678	0	0	0	0	0	0	0	0	1	0.2	0	0	1	0.16	0	0	18	2.48	1	0.15	0	0	2	0.28
BMK_Unigene_004679	0	0	5	0.26	0	0	6	0.37	0	0	0	0	9	0.48	1	0.06	0	0	37	1.99	2	0.1	3	0.17
BMK_Unigene_004680	1146	11.07	803	7.95	731	8.45	870	10.11	620	8.33	652	7.61	131	1.32	214	2.49	150	1.28	238	2.36	225	2.19	172	1.55
BMK_Unigene_004681	0	0	0	0	0	0	0	0	0	0	0	0	0	0	3	0.57	1	0.15	3	0.5	11	1.79	1	0.15
BMK_Unigene_004690	4789	643.06	4918	676.93	3813	608.82	1907	310.38	2546	460.8	3584	585.76	2113	291.43	1765	273.8	3015	365.49	2292	309.84	2181	289.29	1725	210.83
BMK_Unigene_004696	4	1.45	7	2.45	0	0	0	0	1	0.44	0	0	11	3.77	15	5.59	6	1.89	0	0	5	1.64	24	7.2
BMK_Unigene_004697	859	9.07	796	8.62	664	8.39	870	11.04	709	10.41	680	8.67	1269	13.94	1178	14.9	1656	15.49	1535	16.58	1864	19.76	1571	15.44
BMK_Unigene_004702	37	1.62	88	3.9	81	4.2	67	3.51	172	10.22	140	7.31	99	4.42	254	12.94	519	19.86	603	26.41	270	11.6	759	30.19
BMK_Unigene_004704	0	0	0	0	0	0	7	2.13	0	0	0	0	0	0	0	0	0	0	5	1.23	0	0	0	0
BMK_Unigene_004705	3744	324.69	4276	380.07	2967	306.53	4107	430.42	2913	344.45	4985	524.61	3846	344.32	4042	410.57	6633	515.87	6941	609.9	5781	498.42	4818	383.72
BMK_Unigene_004707	0	0	11	3.86	0	0	0	0	0	0	0	0	0	0	0	0	2	0.63	0	0	0	0	0	0
BMK_Unigene_004708	1734	25.03	3467	51.28	839	14.49	291	5.05	1556	31.22	1438	25.09	5759	86.47	6166	106.48	1368	17.52	1018	15.04	1362	19.75	1358	18.25
BMK_Unigene_004710	713	21.76	933	29.19	663	24.19	229	8.41	638	26.97	631	23.27	509	16.12	229	8.32	608	16.51	685	21.36	358	10.96	297	8.42
BMK_Unigene_004717	8	2.78	0	0	1	0.41	0	0	0	0	0	0	0	0	0	0	0	0	0	0	0	0	0	0
BMK_Unigene_004720	35	0.45	38	0.5	51	0.79	68	1.05	9	0.17	36	0.56	1477	19.57	786	11.98	1849	20.88	1532	19.97	1943	24.84	1214	14.39
BMK_Unigene_004721	0	0	3	0.8	0	0	0	0	0	0	0	0	0	0	0	0	8	2.13	3	0.77	1	0.25	12	2.79
BMK_Unigene_004726	4	0.12	6	0.18	3	0.11	13	0.46	6	0.24	11	0.39	10	0.3	11	0.38	31	0.81	111	3.33	0	0	78	2.12
BMK_Unigene_004738	2	0.29	0	0	0	0	13	2.29	0	0	1	0.18	0	0	0	0	0	0	2	0.29	1	0.14	0	0
BMK_Unigene_004740	19	5.68	17	5.22	9	3.18	0	0	14	5.45	6	2.21	15	4.52	11	3.63	12	3.3	11	3.24	17	4.91	12	3.17
BMK_Unigene_004741	204	4.58	172	3.96	127	3.41	74	2.01	192	5.98	124	3.37	88	2.06	111	3	264	5.27	172	3.95	168	3.79	190	3.97
BMK_Unigene_004742	1	0.36	0	0	0	0	0	0	1	0.46	0	0	0	0	0	0	7	2.32	0	0	0	0	0	0
BMK_Unigene_004743	628	24.57	593	23.76	182	8.53	175	8.25	529	28.58	161	7.62	29	1.19	39	1.85	16	0.58	12	0.49	37	1.47	43	1.57
BMK_Unigene_004744	842	37.2	39	1.77	1231	64.92	1468	78.12	19	1.16	722	38.59	4	0.18	4	0.21	36	1.44	89	4.01	23	1.05	138	5.65
BMK_Unigene_004745	0	0	35	2.18	0	0	0	0	1	0.09	0	0	35	2.18	8	0.58	18	0.98	50	3.05	27	1.61	64	3.54
BMK_Unigene_004746	6	1.98	2	0.68	2	0.78	0	0	0	0	3	1.22	0	0	0	0	0	0	0	0	0	0	0	0
BMK_Unigene_004748	202	13.16	0	0	2	0.16	19	1.49	5	0.45	18	1.42	4	0.27	1	0.08	0	0	0	0	0	0	0	0
BMK_Unigene_004750	12	2.8	0	0	0	0	0	0	9	2.77	0	0	0	0	0	0	0	0	0	0	0	0	4	0.83
BMK_Unigene_004755	127	2.36	107	2.05	48	1.08	194	4.34	100	2.6	168	3.78	122	2.36	105	2.34	64	1.07	94	1.79	75	1.41	175	3.03
BMK_Unigene_004756	31	2.2	34	2.49	44	3.73	60	5.12	25	2.38	30	2.56	2	0.17	6	0.53	1	0.06	7	0.51	0	0	15	0.99
BMK_Unigene_004766	18	2.76	26	4.08	3	0.55	0	0	6	1.23	7	1.31	1	0.16	3	0.53	10	1.39	7	1.08	5	0.75	0	0
BMK_Unigene_004767	5	0.3	0	0	0	0	0	0	2	0.16	4	0.29	11	0.68	35	2.47	4	0.21	8	0.49	40	2.39	14	0.77
BMK_Unigene_004773	0	0	0	0	0	0	0	0	5	1.68	0	0	0	0	0	0	8	1.87	0	0	0	0	0	0
BMK_Unigene_004774	0	0	8	0.47	0	0	2	0.14	0	0	0	0	0	0	0	0	0	0	76	4.4	0	0	0	0
BMK_Unigene_004777	0	0	0	0	0	0	1	0.38	0	0	0	0	0	0	0	0	1	0.29	6	1.85	0	0	0	0
BMK_Unigene_004785	0	0	5	1.57	3	1.08	5	1.87	4	1.59	1	0.38	0	0	0	0	9	2.53	3	0.9	0	0	7	1.89
BMK_Unigene_004792	14	0.48	6	0.21	15	0.61	38	1.56	5	0.24	8	0.33	100	3.54	113	4.58	12	0.36	118	4.11	0	0	91	2.88
BMK_Unigene_004793	9	0.22	17	0.43	9	0.26	21	0.62	9	0.33	16	0.47	3	0.08	29	0.85	70	1.52	34	0.85	58	1.45	166	3.78
BMK_Unigene_004794	88	2.16	124	3.1	30	0.87	23	0.67	13	0.44	22	0.65	117	2.96	209	6.07	42	0.91	61	1.54	87	2.12	59	1.33
BMK_Unigene_004798	0	0	0	0	0	0	2	0.66	0	0	0	0	0	0	0	0	19	4.71	0	0	4	1.05	0	0
BMK_Unigene_004803	438	11.53	345	9.31	268	8.45	357	11.32	283	10.34	270	8.61	127	3.48	9	0.29	199	4.67	12	0.33	7	0.19	37	0.91
BMK_Unigene_004805	0	0	0	0	0	0	0	0	0	0	3	1.21	0	0	0	0	0	0	3	0.96	0	0	7	2.01
BMK_Unigene_004807	0	0	5	0.86	2	0.4	6	1.22	10	2.24	2	0.41	0	0	0	0	0	0	0	0	0	0	0	0
BMK_Unigene_004809	0	0	2	0.61	0	0	0	0	0	0	0	0	0	0	0	0	14	3.81	7	2.04	0	0	6	1.57
BMK_Unigene_004813	106	7.34	20	1.42	147	12.15	1	0.08	67	6.36	25	2.1	99	7.1	80	6.53	292	18.12	233	16.4	171	11.85	157	10.02
BMK_Unigene_004817	0	0	25	2.12	6	0.59	148	14.79	0	0	10	1	0	0	0	0	6	0.44	2	0.17	2	0.16	0	0
BMK_Unigene_004823	0	0	2	0.51	0	0	0	0	0	0	0	0	0	0	0	0	8	2	0	0	0	0	0	0
BMK_Unigene_004825	0	0	44	12.92	0	0	0	0	2	0.75	1	0.35	38	10.97	41	12.98	17	4.47	2	0.56	12	3.32	42	10.65
BMK_Unigene_004827	0	0	0	0	4	0.82	0	0	0	0	0	0	0	0	0	0	5	0.79	2	0.35	11	1.88	0	0
BMK_Unigene_004828	0	0	0	0	0	0	0	0	0	0	0	0	0	0	0	0	2	0.26	15	2.18	0	0	2	0.26
BMK_Unigene_004832	4	0.53	4	0.55	1	0.16	1	0.16	13	2.34	11	1.79	30	4.11	23	3.54	42	5.06	5	0.67	31	4.08	20	2.48
BMK_Unigene_004838	0	0	0	0	0	0	0	0	1	0.51	0	0	2	0.79	0	0	5	1.85	0	0	0	0	6	2.08
BMK_Unigene_004839	0	0	6	1.44	0	0	0	0	0	0	19	5.45	0	0	0	0	0	0	0	0	0	0	0	0
BMK_Unigene_004844	0	0	0	0	0	0	5	1.76	0	0	0	0	0	0	6	1.91	0	0	2	0.57	0	0	0	0
BMK_Unigene_004851	27	0.88	2	0.07	4	0.15	76	2.97	16	0.72	14	0.55	0	0	0	0	1	0.03	0	0	2	0.06	0	0
BMK_Unigene_004852	3	0.39	2	0.27	6	0.94	0	0	12	2.12	4	0.64	0	0	0	0	0	0	2	0.26	0	0	0	0
BMK_Unigene_004856	9	2.68	0	0	0	0	2	0.73	1	0.39	0	0	0	0	0	0	0	0	0	0	0	0	0	0
BMK_Unigene_004860	7	0.87	20	2.54	0	0	0	0	2	0.33	0	0	1	0.13	4	0.57	0	0	2	0.25	1	0.12	3	0.34
BMK_Unigene_004866	0	0	2	0.7	5	2.03	0	0	0	0	4	1.69	0	0	0	0	0	0	0	0	1	0.33	1	0.3
BMK_Unigene_004869	77	25.69	60	20.56	26	10.27	11	4.5	141	60.84	16	6.58	100	33.55	104	38.23	30	9.25	4	1.31	65	21.02	34	9.98
BMK_Unigene_004872	1	0.13	21	2.78	0	0	1	0.16	4	0.7	0	0	0	0	0	0	0	0	3	0.39	0	0	2	0.24
BMK_Unigene_004886	77	4.93	130	8.47	59	4.48	48	3.74	104	9.11	105	8.13	14	0.96	1	0.09	0	0	0	0	1	0.12	8	0.52
BMK_Unigene_004887	0	0	6	1.55	0	0	0	0	0	0	0	0	7	1.78	0	0	0	0	0	0	1	0.24	0	0
BMK_Unigene_004898	0	0	10	1.83	0	0	0	0	2	0.48	0	0	1	0.18	2	0.41	0	0	0	0	0	0	0	0
BMK_Unigene_004908	9	2.12	19	4.58	1	0.28	1	0.29	0	0	1	0.29	0	0	1	0.26	0	0	0	0	2	0.46	1	0.21
BMK_Unigene_004909	8	1.29	11	1.81	0	0	0	0	20	4.31	0	0	2	0.33	0	0	5	0.73	2	0.32	3	0.47	2	0.29
BMK_Unigene_004912	0	0	0	0	0	0	0	0	10	2.98	0	0	0	0	0	0	0	0	0	0	0	0	0	0
BMK_Unigene_004914	0	0	4	0.65	0	0	0	0	0	0	0	0	0	0	0	0	14	2	0	0	14	2.17	0	0
BMK_Unigene_004916	367	17.41	242	11.77	545	30.8	349	19.96	181	11.85	377	21.61	495	24.32	257	14.45	1115	47.03	783	37.77	558	26.39	1315	57.56
BMK_Unigene_004918	0	0	0	0	0	0	0	0	0	0	0	0	8	2.16	3	0.89	0	0	1	0.26	3	0.78	1	0.24
BMK_Unigene_004922	0	0	0	0	0	0	0	0	0	0	0	0	7	0.5	22	1.79	4	0.25	7	0.49	10	0.69	23	1.46
BMK_Unigene_004924	4	0.32	3	0.25	6	0.58	12	1.17	8	0.88	17	1.67	9	0.75	29	2.75	35	2.55	26	2.14	51	4.18	31	2.31
BMK_Unigene_004925	233	3.64	309	4.95	64	1.2	16	0.3	351	7.64	46	0.87	71	1.16	79	1.49	39	0.54	36	0.59	19	0.3	93	1.36
BMK_Unigene_004926	28	4.58	0	0	0	0	0	0	0	0	0	0	3	0.5	0	0	0	0	0	0	0	0	0	0
BMK_Unigene_004929	463	7.53	701	11.67	267	5.18	175	3.43	582	13.14	379	7.44	110	1.87	115	2.25	207	2.99	67	1.12	143	2.33	169	2.56
BMK_Unigene_004932	22	0.73	9	0.31	1	0.04	1	0.04	15	0.69	5	0.2	52	1.79	45	1.77	158	4.65	139	4.7	28	0.93	54	1.66
BMK_Unigene_004940	76	2.8	116	4.39	38	1.66	39	1.76	115	5.85	63	2.83	40	1.54	41	1.83	50	1.65	50	1.89	50	1.87	59	2.03
BMK_Unigene_004941	9	2.21	0	0	0	0	0	0	2	0.65	0	0	3	0.75	0	0	0	0	0	0	0	0	0	0
BMK_Unigene_004944	7	1.61	3	0.71	0	0	9	2.53	1	0.3	1	0.28	0	0	0	0	0	0	0	0	0	0	0	0
BMK_Unigene_004946	27	2.3	13	1.14	20	2.03	0	0	125	14.55	14	1.45	0	0	0	0	2	0.15	0	0	0	0	0	0
BMK_Unigene_004961	70	4.05	50	2.95	5	0.34	13	0.94	88	6.98	3	0.21	0	0	1	0.07	0	0	3	0.17	6	0.4	3	0.17
BMK_Unigene_004964	0	0	0	0	0	0	0	0	10	2.04	3	0.56	12	1.87	14	2.45	1	0.14	6	0.92	0	0	5	0.69
BMK_Unigene_004966	49	1.94	13	0.55	309	14.5	73	3.45	0	0	89	4.26	13	0.56	11	0.51	3	0.1	30	1.2	10	0.43	6	0.22
BMK_Unigene_004967	3	0.12	0	0	0	0	0	0	0	0	0	0	31	1.27	50	2.28	14	0.48	7	0.27	82	3.15	34	1.21
BMK_Unigene_004975	0	0	0	0	0	0	0	0	0	0	2	0.84	6	2.04	0	0	0	0	0	0	0	0	0	0
BMK_Unigene_004978	168	5.29	123	3.97	110	4.14	66	2.5	143	6.23	99	3.77	106	3.46	84	3.15	248	6.94	112	3.6	78	2.46	184	5.37
BMK_Unigene_004979	7	2.13	0	0	0	0	2	0.75	0	0	0	0	0	0	0	0	0	0	0	0	0	0	0	0
BMK_Unigene_004980	17	0.61	121	4.45	18	0.77	5	0.22	102	5.06	54	2.34	3	0.11	1	0.04	6	0.19	28	1.03	0	0	9	0.3
BMK_Unigene_004981	9	1.63	0	0	0	0	0	0	0	0	0	0	7	1.3	0	0	3	0.49	0	0	10	1.78	3	0.49
BMK_Unigene_004983	7	2.04	0	0	0	0	0	0	1	0.38	0	0	0	0	0	0	0	0	0	0	6	1.69	0	0
BMK_Unigene_004986	0	0	0	0	0	0	36	2.96	1	0.09	0	0	0	0	0	0	2	0.12	0	0	0	0	6	0.38
BMK_Unigene_004987	0	0	0	0	0	0	0	0	2	0.4	0	0	6	0.91	7	1.19	15	1.99	0	0	2	0.29	0	0
BMK_Unigene_004992	0	0	8	1.56	0	0	0	0	9	2.28	0	0	0	0	0	0	0	0	0	0	0	0	4	0.69
BMK_Unigene_004997	4	0.51	0	0	0	0	3	0.46	18	3.09	3	0.46	0	0	2	0.29	0	0	0	0	0	0	0	0
BMK_Unigene_004999	386	8.9	451	10.63	495	13.61	339	9.41	388	12.38	345	9.61	327	7.82	262	7.19	597	12.2	286	6.72	368	8.49	410	8.76
BMK_Unigene_005000	1019	19.95	749	15.04	885	20.71	937	22.08	663	18.03	842	19.92	72	1.47	104	2.44	221	3.85	95	1.92	102	2	100	1.83
BMK_Unigene_005002	25	1.58	48	3.08	10	0.75	27	2.04	2	0.17	0	0	10	0.65	13	0.96	8	0.45	21	1.4	21	1.31	43	2.48
BMK_Unigene_005005	0	0	0	0	2	0.54	0	0	0	0	0	0	8	1.86	0	0	0	0	0	0	1	0.22	2	0.41
BMK_Unigene_005006	5	1.11	0	0	0	0	0	0	1	0.29	0	0	0	0	8	2	0	0	0	0	2	0.43	0	0
BMK_Unigene_005012	686	37.47	779	43.63	254	16.56	460	30.33	223	16.8	454	30.08	620	35.09	742	47.93	286	13.94	354	19.68	598	32.67	322	16.25
BMK_Unigene_005014	0	0	0	0	1	0.46	4	1.93	0	0	0	0	0	0	0	0	0	0	8	3.06	0	0	0	0
BMK_Unigene_005017	3	0.4	4	0.55	0	0	0	0	13	2.36	1	0.16	0	0	0	0	0	0	0	0	0	0	0	0
BMK_Unigene_005018	6	2.43	0	0	1	0.48	0	0	0	0	0	0	0	0	1	0.44	3	1.13	0	0	0	0	0	0
BMK_Unigene_005023	959	8.05	567	4.88	18	0.18	201	2.03	1078	12.6	7	0.07	43	0.38	9	0.1	31	0.23	73	0.63	36	0.3	44	0.34
BMK_Unigene_005024	0	0	0	0	0	0	0	0	0	0	0	0	7	0.57	0	0	9	0.64	37	2.96	16	1.26	2	0.15
BMK_Unigene_005027	0	0	0	0	0	0	0	0	0	0	2	0.52	10	2.15	1	0.24	0	0	2	0.42	0	0	4	0.76
BMK_Unigene_005028	0	0	31	1.66	1	0.06	29	1.83	56	4.03	10	0.63	22	1.2	14	0.87	0	0	17	0.92	0	0	2	0.1
BMK_Unigene_005029	0	0	0	0	2	0.35	0	0	0	0	0	0	14	2.11	0	0	13	1.72	0	0	3	0.43	5	0.67
BMK_Unigene_005030	0	0	0	0	4	1.44	0	0	0	0	0	0	10	3.07	9	3.02	0	0	0	0	5	1.47	14	3.77
BMK_Unigene_005031	125	5.08	12	0.5	33	1.59	132	6.42	31	1.73	13	0.64	2	0.12	3	0.18	1	0.04	1	0.04	11	0.44	18	0.68
BMK_Unigene_005032	0	0	0	0	0	0	3	1.21	0	0	0	0	4	1.33	0	0	2	0.61	2	0.65	0	0	10	2.91
BMK_Unigene_005033	7	0.88	1	0.13	0	0	0	0	0	0	0	0	162	21.17	155	22.69	96	10.98	38	4.93	71	8.88	114	13.14
BMK_Unigene_005034	0	0	0	0	4	0.56	16	2.27	2	0.32	4	0.57	0	0	0	0	0	0	6	0.71	0	0	4	0.43
BMK_Unigene_005038	0	0	0	0	0	0	2	1	7	3.62	0	0	0	0	0	0	0	0	0	0	0	0	2	0.71
BMK_Unigene_005039	38	1.18	30	0.98	14	0.55	70	2.64	31	1.33	17	0.65	421	13.56	419	15.47	672	18.52	969	30.66	664	20.62	547	15.73
BMK_Unigene_005048	0	0	0	0	0	0	0	0	5	2.16	0	0	0	0	0	0	0	0	0	0	0	0	0	0
BMK_Unigene_005049	84	2.05	17	0.42	9	0.26	4	0.12	15	0.51	17	0.5	30	0.76	57	1.66	13	0.28	19	0.47	49	1.2	54	1.22
BMK_Unigene_005053	0	0	0	0	0	0	0	0	0	0	0	0	11	0.73	20	1.52	30	1.73	27	1.77	25	1.61	36	2.14
BMK_Unigene_005055	3023	109.74	2187	81.39	1884	81.71	2014	88.09	2682	134.55	2341	102.84	365	13.75	193	8.37	517	16.72	272	10.08	8	0.29	327	11.01
BMK_Unigene_005061	0	0	0	0	0	0	0	0	0	0	6	1.94	1	0.27	0	0	0	0	0	0	0	0	2	0.47
BMK_Unigene_005062	0	0	0	0	2	0.65	6	2.03	0	0	0	0	0	0	0	0	0	0	3	0.82	0	0	0	0
BMK_Unigene_005067	368	4.36	272	3.31	140	1.98	413	5.88	265	4.38	262	3.75	1190	14.66	847	12.01	1057	11.09	1129	13.68	1466	17.43	1293	14.25
BMK_Unigene_005068	65	4.6	95	6.9	30	2.53	15	1.28	92	8.92	52	4.47	70	5.13	47	3.92	52	3.3	58	4.17	45	3.23	53	3.46
BMK_Unigene_005070	12	1.65	22	3.1	4	0.65	6	1	10	1.85	3	0.5	3	0.42	3	0.48	0	0	1	0.14	6	0.81	10	1.25
BMK_Unigene_005074	0	0	0	0	0	0	9	2.31	0	0	0	0	0	0	0	0	2	0.38	0	0	0	0	0	0
BMK_Unigene_005078	50	0.63	43	0.55	50	0.75	41	0.62	46	0.81	47	0.71	246	3.18	139	2.08	258	2.85	157	2.01	175	2.18	178	2.06
BMK_Unigene_005080	1050	35.22	1026	35.27	1037	41.52	573	23.15	848	39.31	825	33.45	1104	38.43	726	28.95	845	25.2	376	12.89	969	32.54	837	26.03
BMK_Unigene_005085	0	0	3	0.23	0	0	73	6.62	4	0.41	6	0.55	8	0.62	15	1.32	16	1.08	12	0.91	9	0.67	5	0.35
BMK_Unigene_005086	0	0	0	0	0	0	0	0	0	0	2	0.45	0	0	18	3.8	2	0.34	0	0	0	0	0	0
BMK_Unigene_005087	328	10.74	302	10.13	84	3.29	34	1.34	348	15.74	102	4.07	102	3.49	39	1.52	22	0.65	41	1.37	46	1.54	52	1.59
BMK_Unigene_005089	54	2.4	103	4.69	2	0.11	13	0.7	180	11.02	115	6.18	1	0.05	9	0.47	0	0	0	0	0	0	0	0
BMK_Unigene_005101	436	7.69	461	8.33	146	3.09	127	2.69	764	18.69	154	3.28	50	0.92	132	2.78	192	3.02	196	3.54	87	1.54	422	6.93
BMK_Unigene_005107	0	0	77	1.27	1	0.02	113	2.18	3	0.07	0	0	18	0.3	16	0.31	16	0.23	140	2.3	4	0.06	61	0.91
BMK_Unigene_005126	0	0	3	0.77	0	0	0	0	0	0	0	0	0	0	7	1.96	0	0	3	0.75	0	0	0	0
BMK_Unigene_005132	0	0	0	0	0	0	0	0	5	2.09	0	0	3	0.97	0	0	0	0	0	0	0	0	0	0
BMK_Unigene_005140	83	2.49	119	3.63	46	1.67	85	3.05	41	1.72	35	1.28	150	4.64	139	4.93	154	4.08	74	2.25	174	5.2	141	3.91
BMK_Unigene_005142	267	5.28	332	6.72	178	4.22	130	3.11	290	7.97	180	4.29	64	1.33	151	3.58	53	0.94	39	0.8	74	1.48	101	1.87
BMK_Unigene_005147	7	2.3	7	2.36	1	0.39	0	0	3	1.27	1	0.4	0	0	0	0	4	1.21	0	0	0	0	5	1.45
BMK_Unigene_005149	1094	14.84	430	5.98	859	13.93	1764	28.77	377	7.11	516	8.46	363	5.14	298	4.85	288	3.47	640	8.9	332	4.53	364	4.6
BMK_Unigene_005150	156	2.56	101	1.7	96	1.88	32	0.63	86	1.96	64	1.27	4	0.07	14	0.28	16	0.25	8	0.14	2	0.03	3	0.05
BMK_Unigene_005159	0	0	0	0	0	0	4	1.87	0	0	0	0	0	0	0	0	0	0	0	0	0	0	0	0
BMK_Unigene_005165	2116	41.29	2209	44.18	1707	39.82	3526	82.76	816	22.1	2868	67.63	78	1.59	83	1.95	310	5.38	153	3.06	198	3.88	205	3.73
BMK_Unigene_005166	0	0	1	0.21	11	2.61	1	0.24	0	0	0	0	0	0	0	0	0	0	0	0	7	1.37	0	0
BMK_Unigene_005167	78	2.31	37	1.12	22	0.78	167	5.96	20	0.82	9	0.32	2	0.06	8	0.28	1	0.03	23	0.7	3	0.09	41	1.13
BMK_Unigene_005168	426	8.04	941	18.22	294	6.64	236	5.36	1215	31.87	764	17.43	337	6.62	417	9.41	132	2.21	267	5.16	567	10.74	524	9.2
BMK_Unigene_005170	40	0.94	119	2.85	27	0.75	20	0.56	20	0.68	24	0.68	0	0	0	0	0	0	0	0	0	0	5	0.11
BMK_Unigene_005176	0	0	0	0	0	0	0	0	0	0	0	0	13	4.73	6	2.37	8	2.7	12	4.27	3	1.05	1	0.32
BMK_Unigene_005177	86	1.89	69	1.54	17	0.46	8	0.21	91	2.78	24	0.63	4	0.09	10	0.26	8	0.15	0	0	4	0.09	17	0.34
BMK_Unigene_005178	8	0.97	0	0	52	7.63	13	1.91	0	0	31	4.58	0	0	1	0.14	0	0	5	0.61	0	0	0	0
BMK_Unigene_005179	8	0.34	19	0.84	0	0	6	0.31	55	3.27	5	0.26	0	0	0	0	1	0.04	0	0	0	0	0	0
BMK_Unigene_005182	0	0	0	0	2	0.28	0	0	0	0	0	0	0	0	8	1.1	19	2.03	15	1.79	25	2.93	19	2.05
BMK_Unigene_005188	83	0.86	46	0.49	31	0.39	32	0.41	30	0.43	65	0.82	2001	21.45	922	11.38	1994	18.21	1020	10.76	1933	20	1392	13.35
BMK_Unigene_005189	62	1.44	39	0.93	33	0.91	29	0.8	82	2.63	32	0.89	8	0.21	8	0.25	41	0.85	50	1.18	21	0.49	34	0.74
BMK_Unigene_005196	679	13.42	658	13.32	554	13.1	518	12.31	554	15.21	446	10.66	85	1.76	41	0.98	117	2.06	72	1.47	89	1.76	68	1.25
BMK_Unigene_005198	83	3.64	220	9.88	62	3.26	199	10.51	55	3.32	100	5.3	56	2.54	66	3.43	12	0.47	69	3.11	37	1.62	26	1.05
BMK_Unigene_005199	105	2.27	148	3.28	99	2.56	34	0.89	136	4.09	101	2.64	87	1.96	76	1.96	147	2.83	116	2.57	81	1.76	78	1.57
BMK_Unigene_005200	1564	18.44	784	9.48	2407	33.96	2228	31.6	835	13.7	1937	27.6	1175	14.43	1257	17.76	3087	32.29	3105	37.49	1255	14.87	2977	32.69
BMK_Unigene_005202	9	2.16	18	4.43	0	0	0	0	12	3.79	6	1.76	8	1.95	8	2.18	1	0.22	3	0.71	2	0.47	3	0.64
BMK_Unigene_005207	15	0.89	10	0.61	7	0.49	15	1.07	2	0.16	5	0.36	6	0.37	9	0.63	25	1.32	30	1.81	8	0.47	7	0.38
BMK_Unigene_005215	0	0	0	0	4	0.75	0	0	6	1.27	1	0.19	15	2.42	2	0.36	2	0.28	6	0.95	2	0.31	4	0.57
BMK_Unigene_005223	118	3.35	196	5.68	82	2.77	47	1.6	118	4.66	153	5.23	90	2.64	65	2.19	63	1.58	65	1.88	64	1.81	130	3.41
BMK_Unigene_005225	127	1.67	736	9.87	71	1.12	93	1.48	164	3	169	2.68	4111	55.98	2434	38.14	715	8.31	3074	41.19	1584	20.83	581	7.09
BMK_Unigene_005228	408	5.81	514	7.51	279	4.76	150	2.58	415	8.22	312	5.38	587	8.69	463	7.9	674	8.51	711	10.36	681	9.74	716	9.49
BMK_Unigene_005234	0	0	10	3.39	0	0	0	0	0	0	0	0	0	0	0	0	0	0	0	0	0	0	0	0
BMK_Unigene_005242	0	0	0	0	0	0	0	0	3	1.11	0	0	0	0	6	1.88	0	0	0	0	0	0	4	1
BMK_Unigene_005245	93	2.11	29	0.67	208	5.65	70	1.93	12	0.38	204	5.58	14	0.33	13	0.35	7	0.14	9	0.21	12	0.27	7	0.15
BMK_Unigene_005247	0	0	0	0	2	0.36	11	2.03	0	0	0	0	0	0	0	0	0	0	0	0	0	0	0	0
BMK_Unigene_005248	0	0	0	0	0	0	10	1.8	0	0	1	0.18	0	0	0	0	3	0.4	1	0.15	0	0	1	0.13
BMK_Unigene_005251	14	0.8	13	0.76	19	1.29	6	0.41	6	0.47	1	0.07	26	1.54	14	0.94	40	2.09	17	0.99	23	1.31	19	1
BMK_Unigene_005259	0	0	0	0	0	0	10	3.04	0	0	0	0	0	0	0	0	2	0.46	0	0	0	0	0	0
BMK_Unigene_005271	228	5.04	168	3.81	191	5.05	249	6.61	206	6.31	175	4.68	22	0.51	22	0.59	89	1.75	30	0.68	9	0.2	59	1.22
BMK_Unigene_005280	57	1.11	48	0.95	116	2.69	520	12.09	16	0.44	62	1.45	280	5.63	355	8.19	122	2.1	569	11.25	168	3.27	295	5.3
BMK_Unigene_005286	40	0.79	14	0.28	45	1.04	201	4.67	11	0.3	16	0.4	720	14.47	506	11.69	851	14.61	603	11.93	728	14.13	1674	30.08
BMK_Unigene_005290	30	0.38	20	0.26	7	0.11	2	0.03	40	0.71	3	0.05	1841	24.37	5652	86.09	178	2.02	475	6.2	1223	15.63	612	7.25
BMK_Unigene_005291	52	2.25	17	0.76	17	0.88	18	0.94	41	2.45	18	0.94	25	1.12	5	0.26	44	1.7	26	1.15	25	1.08	4	0.16
BMK_Unigene_005293	57	1.42	14	0.37	335	9.95	809	24.17	5	0.17	79	2.37	1166	30.04	210	6.21	1812	39.93	1433	36.32	1887	46.91	2114	48.7
BMK_Unigene_005295	53	3.19	48	2.95	28	2.04	9	0.64	82	6.7	35	2.53	26	1.63	3	0.21	6	0.35	14	0.85	25	1.48	18	0.99
BMK_Unigene_005296	245	5.5	156	3.59	121	3.25	111	3.02	256	7.99	121	3.3	167	3.91	161	4.33	120	2.39	112	2.58	102	2.31	175	3.65
BMK_Unigene_005297	22	0.48	45	1.01	23	0.6	68	1.8	8	0.24	19	0.5	345	7.87	141	3.69	63	1.23	318	7.14	249	5.48	144	2.94
BMK_Unigene_005298	604	12.6	541	11.55	589	14.67	635	15.93	330	9.55	657	16.55	476	10.31	369	9.18	756	13.99	715	15.24	575	12.03	547	10.6
BMK_Unigene_005305	470	5.9	626	8.04	337	5.05	325	4.9	341	5.95	328	4.98	543	7.09	450	6.76	542	6.03	392	5.04	367	4.63	428	5
BMK_Unigene_005308	0	0	18	0.75	0	0	10	0.53	3	0.17	5	0.27	184	7.72	170	8.19	198	7.15	56	2.35	76	3.1	208	7.81
BMK_Unigene_005314	0	0	0	0	0	0	6	1.81	0	0	0	0	0	0	0	0	0	0	0	0	0	0	0	0
BMK_Unigene_005330	400	10.72	409	11.23	242	7.75	149	4.81	298	11.06	185	5.99	201	5.62	187	5.98	57	1.37	91	2.5	74	1.99	104	2.6
BMK_Unigene_005337	175	3.03	156	2.78	401	8.31	431	8.98	57	1.38	231	4.84	66	1.2	103	2.13	312	4.8	578	10.25	398	6.93	709	11.43
BMK_Unigene_005344	615	7.69	452	5.79	354	5.3	299	4.49	260	4.52	360	5.44	772	10.04	947	14.17	1046	11.59	611	7.82	810	10.17	991	11.54
BMK_Unigene_005347	28	1.44	37	1.95	76	4.66	26	1.61	89	6.29	164	10.2	1410	75.1	295	17.99	2800	128.33	111	5.81	714	36.67	2160	102.59
BMK_Unigene_005348	111	2.66	92	2.26	128	3.66	114	3.28	71	2.36	88	2.55	77	1.93	71	2.03	73	1.57	133	3.28	128	3.07	167	3.71
BMK_Unigene_005355	0	0	0	0	8	2.05	0	0	0	0	0	0	0	0	0	0	0	0	0	0	0	0	8	1.55
BMK_Unigene_005356	54	1.86	45	1.59	53	2.18	53	2.2	20	0.95	44	1.83	62	2.22	29	1.19	151	4.63	67	2.35	107	3.69	84	2.68
BMK_Unigene_005367	753	21.91	1340	39.95	293	10.18	48	1.68	1205	48.54	110	3.87	530	16.04	670	23.23	322	8.33	105	3.12	151	4.4	297	8.02
BMK_Unigene_005370	0	0	6	1.91	0	0	0	0	0	0	0	0	0	0	0	0	0	0	0	0	0	0	0	0
BMK_Unigene_005374	1017	22.37	908	20.46	1035	27.2	1174	31.06	658	20.09	872	23.2	1241	28.38	1047	27.5	2155	42.09	1188	26.71	1302	28.72	1353	27.65
BMK_Unigene_005381	2717	28.72	2931	31.75	2264	28.62	2801	35.59	2955	43.46	3204	40.9	401	4.41	326	4.14	766	7.18	710	7.68	666	7.08	529	5.21
BMK_Unigene_005382	2417	28.79	5188	63.32	2158	30.73	1443	20.68	3873	64.16	3336	48	1509	18.71	1674	23.88	1743	18.41	1348	16.45	1571	18.8	1922	21.32
BMK_Unigene_005385	0	0	10	2.16	1	0.25	0	0	9	2.51	0	0	0	0	1	0.24	0	0	0	0	0	0	8	1.51
BMK_Unigene_005393	12309	678.86	4407	249.11	9963	655.68	6878	457.45	6615	501.67	6994	467.22	7216	412.27	4039	263.38	7509	369.65	6525	366.23	5473	301.43	7923	403.62
BMK_Unigene_005395	0	0	2	0.39	3	0.68	0	0	9	2.3	0	0	0	0	0	0	0	0	0	0	0	0	0	0
BMK_Unigene_005397	27	4.04	2	0.31	0	0	0	0	0	0	0	0	0	0	0	0	0	0	0	0	0	0	0	0
BMK_Unigene_005398	683	39.01	391	22.92	1134	77.21	363	24.98	234	18.4	307	21.25	1212	71.64	520	35.12	613	31.23	437	25.42	1089	62.03	849	44.76
BMK_Unigene_005402	1	0.2	6	1.21	0	0	0	0	8	2.09	1	0.24	0	0	0	0	3	0.54	1	0.2	0	0	0	0
BMK_Unigene_005405	1103	12.49	1112	12.92	1028	13.93	940	12.8	876	13.8	825	11.29	614	7.24	656	8.9	826	8.3	769	8.92	718	8.17	816	8.6
BMK_Unigene_005406	933	17.49	691	13.27	497	11.14	537	12.12	636	16.56	569	12.89	592	11.54	374	8.4	1337	22.24	983	18.85	1102	20.74	708	12.34
BMK_Unigene_005407	127	9.62	6	0.47	81	7.32	25	2.3	14	1.45	63	5.79	19	1.49	12	1.07	41	2.79	11	0.85	35	2.64	62	4.35
BMK_Unigene_005408	1	0.29	0	0	4	1.38	0	0	10	3.8	0	0	0	0	0	0	0	0	0	0	0	0	2	0.52
BMK_Unigene_005413	1	0.02	0	0	1	0.03	1	0.02	0	0	1	0.02	1604	20.54	1033	15.23	1372	14.98	1031	12.99	1354	16.73	1422	16.29
BMK_Unigene_005415	112	4.38	66	2.64	7	0.33	13	0.61	70	3.78	5	0.24	0	0	3	0.14	0	0	8	0.32	0	0	0	0
BMK_Unigene_005417	0	0	0	0	0	0	1	0.43	4	1.8	0	0	0	0	0	0	1	0.32	0	0	0	0	0	0
BMK_Unigene_005423	481	5.17	1480	16.28	35	0.46	15	0.21	2395	35.77	81	1.05	142	1.59	37	0.48	24	0.24	35	0.39	30	0.33	48	0.49
BMK_Unigene_005424	1	0.27	0	0	3	0.96	1	0.33	2	0.71	2	0.67	0	0	11	3.32	0	0	2	0.54	0	0	1	0.24
BMK_Unigene_005427	0	0	0	0	2	0.41	0	0	0	0	0	0	0	0	0	0	12	1.89	0	0	0	0	0	0
BMK_Unigene_005439	19	0.43	16	0.36	4	0.13	72	1.91	0	0	13	0.35	336	7.63	337	8.79	187	3.63	126	2.82	223	4.88	305	6.18
BMK_Unigene_005440	0	0	0	0	0	0	0	0	6	2.96	0	0	1	0.38	2	0.83	0	0	0	0	0	0	0	0
BMK_Unigene_005443	183	7.39	180	7.45	69	3.33	70	3.41	131	7.31	122	5.96	152	6.37	117	5.61	155	5.58	191	7.88	180	7.28	149	5.58
BMK_Unigene_005445	564	16.78	392	11.97	409	14.53	514	18.43	327	13.47	317	11.41	558	17.24	326	11.58	863	22.84	573	17.41	574	17.13	580	16.03
BMK_Unigene_005446	510	14.54	350	10.22	110	3.75	14	0.48	514	20.29	91	3.17	222	6.59	212	7.22	52	1.32	33	0.96	45	1.3	71	1.88
BMK_Unigene_005448	419	29.56	286	20.67	463	38.86	1323	112.43	251	24.2	472	40.28	206	15.01	153	12.75	294	18.55	497	35.53	196	13.76	262	17.02
BMK_Unigene_005451	1	0.26	0	0	0	0	0	0	0	0	0	0	3	0.8	0	0	8	1.92	5	1.3	1	0.25	0	0
BMK_Unigene_005452	611	15.93	1097	29.28	19	0.59	47	1.47	17	0.61	55	1.73	17	0.46	49	1.52	0	0	0	0	0	0	3	0.07
BMK_Unigene_005454	0	0	0	0	0	0	7	2	0	0	0	0	0	0	0	0	0	0	3	0.7	4	0.91	0	0
BMK_Unigene_005458	156	7.86	37	1.94	87	5.23	190	11.59	39	2.77	23	1.4	61	3.18	74	4.41	85	3.86	95	4.9	36	1.81	52	2.46
BMK_Unigene_005459	8	1.49	6	1.15	0	0	2	0.45	8	1.99	3	0.68	20	3.8	2	0.42	29	4.91	5	0.93	18	3.29	14	2.35
BMK_Unigene_005460	10	0.95	5	0.49	18	2.04	16	1.84	5	0.65	8	0.93	1	0.1	0	0	3	0.26	4	0.39	1	0.09	9	0.79
BMK_Unigene_005468	0	0	0	0	0	0	0	0	5	1.87	0	0	0	0	0	0	3	0.79	0	0	0	0	0	0
BMK_Unigene_005469	705	12.36	487	8.75	536	11.25	579	12.21	519	12.64	423	8.97	333	6.07	179	3.77	405	6.3	311	5.58	304	5.36	267	4.36
BMK_Unigene_005470	12	4.79	0	0	0	0	0	0	3	1.53	0	0	0	0	0	0	0	0	0	0	0	0	0	0
BMK_Unigene_005471	93	2.13	62	1.47	40	1.1	22	0.61	53	1.7	53	1.47	37	0.88	51	1.39	62	1.27	51	1.19	48	1.1	71	1.51
BMK_Unigene_005473	10	0.69	1	0.07	7	0.58	59	4.95	12	1.14	0	0	0	0	0	0	0	0	0	0	0	0	0	0
BMK_Unigene_005479	16	3.2	9	1.85	6	1.42	0	0	4	1.06	1	0.24	0	0	0	0	2	0.36	0	0	0	0	5	0.9
BMK_Unigene_005483	2	0.37	0	0	8	1.76	7	1.58	0	0	15	3.4	2	0.38	0	0	1	0.17	0	0	0	0	0	0
BMK_Unigene_005484	0	0	0	0	5	1.88	0	0	4	1.65	0	0	0	0	0	0	0	0	0	0	2	0.61	0	0
BMK_Unigene_005487	13	0.66	9	0.47	7	0.42	8	0.49	47	3.29	9	0.55	43	2.26	62	3.73	12	0.54	6	0.31	46	2.33	34	1.6
BMK_Unigene_005488	1487	80.63	2412	134.02	1408	91.1	614	40.19	1366	101.89	1475	96.87	0	0	0	0	4	0.21	0	0	0	0	0	0
BMK_Unigene_005489	76	2.32	85	2.66	39	1.42	70	2.58	34	1.44	75	2.77	285	9.04	334	12.17	12	0.33	62	1.93	116	3.55	31	0.88
BMK_Unigene_005493	0	0	3	0.82	0	0	0	0	7	2.44	0	0	0	0	0	0	3	0.73	0	0	0	0	0	0
BMK_Unigene_005495	0	0	0	0	0	0	0	0	5	0.88	0	0	0	0	2	0.3	0	0	17	2.23	4	0.52	5	0.59
BMK_Unigene_005499	757	7.82	803	8.5	1793	22.17	545	6.78	761	10.94	1219	15.22	704	7.57	888	11	1137	10.42	922	9.77	1022	10.61	900	8.66
BMK_Unigene_005502	170	3.64	403	8.79	196	5.01	67	1.72	294	8.7	285	7.35	560	12.4	286	7.28	262	4.96	263	5.73	349	7.46	366	7.25
BMK_Unigene_005506	0	0	0	0	0	0	9	3.56	0	0	0	0	0	0	0	0	0	0	2	0.63	0	0	1	0.28
BMK_Unigene_005509	5	1.05	0	0	0	0	0	0	0	0	7	1.81	0	0	0	0	2	0.38	0	0	0	0	3	0.57
BMK_Unigene_005517	33	7.46	34	7.89	29	7.98	63	17.36	8	2.39	17	4.71	133	30.79	83	21.21	48	9.91	29	6.52	43	9.69	61	12.55
BMK_Unigene_005519	240	6.25	917	24.4	200	6.21	87	2.72	267	9.62	315	9.91	23	0.62	70	2.17	40	0.93	23	0.62	25	0.65	60	1.46
BMK_Unigene_005525	877	21.55	552	13.89	557	16.35	757	22.37	395	13.45	659	19.56	571	14.57	566	16.59	1408	30.73	1069	26.85	649	15.98	781	17.82
BMK_Unigene_005529	21	1.9	27	2.51	1	0.11	1	0.11	17	2.1	5	0.55	0	0	3	0.32	1	0.08	4	0.37	0	0	0	0
BMK_Unigene_005531	23	2.99	6	0.8	9	1.39	33	5.19	12	2.1	29	4.58	0	0	0	0	8	0.95	3	0.39	8	1.03	10	1.18
BMK_Unigene_005533	9	2.06	7	1.64	8	2.17	19	5.3	1	0.3	8	2.24	0	0	0	0	1	0.21	2	0.45	0	0	3	0.61
BMK_Unigene_005535	294	5.43	323	6.11	396	8.73	378	8.38	68	1.75	346	7.7	669	12.82	496	10.93	467	7.65	746	14.07	552	10.21	335	5.74
BMK_Unigene_005536	26	1.18	48	2.24	15	0.82	11	0.6	62	3.89	9	0.5	29	1.37	39	2.1	51	2.07	80	3.71	72	3.28	56	2.4
BMK_Unigene_005537	0	0	13	2.58	0	0	0	0	0	0	0	0	5	0.99	0	0	0	0	0	0	0	0	0	0
BMK_Unigene_005539	317	3.2	364	3.76	212	2.56	152	1.85	367	5.15	198	2.42	121	1.27	86	1.05	81	0.72	167	1.73	121	1.23	167	1.57
BMK_Unigene_005540	10	2.24	6	1.38	0	0	0	0	7	2.08	0	0	0	0	0	0	0	0	6	1.34	9	1.97	0	0
BMK_Unigene_005541	20	2.29	8	0.94	5	0.68	0	0	8	1.24	0	0	0	0	0	0	1	0.1	2	0.23	0	0	0	0
BMK_Unigene_005542	900	15.06	831	14.25	583	11.65	644	12.94	645	14.99	638	12.88	568	9.88	675	13.5	1041	15.44	1062	18.16	696	11.68	693	10.79
BMK_Unigene_005543	0	0	2	0.53	0	0	10	3.17	0	0	0	0	0	0	0	0	0	0	0	0	0	0	0	0
BMK_Unigene_005544	15	0.47	21	0.67	17	0.63	13	0.49	21	0.91	17	0.64	44	1.42	30	1.11	32	0.89	70	2.26	70	2.18	40	1.16
BMK_Unigene_005548	2476	21.88	2296	20.78	1601	16.92	2595	27.56	1691	20.8	2374	25.33	330	3.04	340	3.6	1019	7.98	913	8.27	830	7.37	536	4.41
BMK_Unigene_005550	1	0.2	1	0.21	0	0	0	0	0	0	0	0	0	0	10	2.28	0	0	0	0	4	0.79	9	1.63
BMK_Unigene_005556	0	0	0	0	0	0	0	0	0	0	1	0.15	2	0.26	0	0	0	0	20	2.56	0	0	0	0
BMK_Unigene_005557	45	0.65	119	1.78	13	0.23	80	1.4	26	0.52	36	0.63	98	1.48	86	1.5	240	3.09	627	9.3	244	3.55	339	4.58
BMK_Unigene_005559	1485	25.31	2081	36.36	981	19.99	314	6.44	838	19.85	908	18.71	2951	52.32	1000	20.39	497	7.52	1167	20.35	2791	47.76	973	15.43
BMK_Unigene_005560	54	5.6	64	6.8	40	4.94	69	8.65	36	5.07	28	3.53	38	4.06	52	6.28	8	0.75	110	11.53	16	1.65	51	4.84
BMK_Unigene_005563	30	1.25	20	0.85	1	0.05	0	0	71	4.07	11	0.55	1	0.04	1	0.05	2	0.07	2	0.08	0	0	3	0.12
BMK_Unigene_005568	34	0.68	71	1.47	33	0.8	38	0.93	54	1.5	49	1.2	252	5.23	204	4.88	352	6.24	501	10.24	303	6.07	331	6.14
BMK_Unigene_005572	1	0.16	0	0	0	0	7	1.38	9	1.96	2	0.4	3	0.5	0	0	0	0	0	0	6	0.96	2	0.29
BMK_Unigene_005576	7	0.78	0	0	0	0	0	0	14	2.12	0	0	0	0	4	0.52	0	0	0	0	0	0	0	0
BMK_Unigene_005577	0	0	0	0	3	0.76	0	0	2	0.57	8	2.1	0	0	0	0	0	0	0	0	0	0	0	0
BMK_Unigene_005578	10	0.74	2	0.15	0	0	0	0	0	0	2	0.18	43	3.29	0	0	148	9.79	46	3.45	28	2.06	5	0.34
BMK_Unigene_005579	0	0	5	0.09	9	0.2	17	0.35	2	0.05	7	0.15	748	13.13	637	12.86	3589	53.71	2949	50.88	2503	42.36	1488	23.34
BMK_Unigene_005583	37	0.99	11	0.3	18	0.58	66	2.16	24	0.89	20	0.65	6	0.17	1	0.03	89	2.13	16	0.44	17	0.46	25	0.62
BMK_Unigene_005587	311	6.24	220	4.53	134	3.23	128	3.1	138	3.86	247	5.98	49	1.04	19	0.47	5	0.11	32	0.66	10	0.2	25	0.48
BMK_Unigene_005589	1	0.03	1	0.03	2	0.08	5	0.2	12	0.54	10	0.4	9	0.31	48	1.87	2	0.06	85	2.84	8	0.26	29	0.88
BMK_Unigene_005592	151	1.62	293	3.22	85	1.1	23	0.3	285	4.25	88	1.15	2510	27.97	1588	20.37	981	9.31	456	5.01	1427	15.35	1481	14.78
BMK_Unigene_005599	14	0.99	33	2.39	7	0.59	4	0.34	18	1.74	11	0.94	9	0.66	28	2.33	28	1.77	28	2.01	28	1.97	10	0.65
BMK_Unigene_005600	380	11.66	371	11.66	296	10.87	113	4.17	226	9.59	230	8.53	284	9.06	144	5.26	278	7.58	229	7.18	288	8.85	197	5.62
BMK_Unigene_005602	221	3.28	285	4.34	100	1.77	71	1.27	464	9.57	133	2.39	21168	326.64	10158	180.29	7918	104.21	6575	99.83	21456	319.55	13365	184.5
BMK_Unigene_005603	0	0	0	0	0	0	0	0	15	2.66	0	0	0	0	2	0.3	0	0	0	0	0	0	0	0
BMK_Unigene_005609	160	2.5	241	3.84	126	2.34	109	2.04	206	4.46	176	3.31	1108	17.87	995	18.45	1088	14.97	904	14.35	909	14.16	1040	15.01
BMK_Unigene_005611	0	0	0	0	4	1.84	0	0	0	0	0	0	2	0.78	0	0	0	0	0	0	0	0	0	0
BMK_Unigene_005612	1103	16.45	700	10.69	522	9.3	317	5.68	557	11.54	358	6.45	83	1.29	120	2.16	139	1.84	273	4.17	89	1.34	72	1.01
BMK_Unigene_005620	0	0	4	0.76	1	0.22	0	0	0	0	0	0	6	1.13	3	0.63	12	2.01	15	2.77	4	0.72	10	1.66
BMK_Unigene_005622	13	0.45	12	0.43	6	0.25	16	0.67	45	2.16	10	0.42	5	0.18	14	0.58	13	0.4	21	0.74	17	0.59	27	0.87
BMK_Unigene_005625	2	0.56	0	0	0	0	0	0	0	0	0	0	7	1.99	1	0.31	0	0	0	0	0	0	0	0
BMK_Unigene_005627	7762	84.81	7536	84.39	4886	63.84	5630	73.96	7336	111.54	6106	80.59	3785	43.04	2506	32.81	7775	75.32	7514	84.08	5620	61.69	5873	59.76
BMK_Unigene_005633	2	0.08	2	0.08	37	1.66	4	0.18	22	1.15	65	2.96	0	0	2	0.09	0	0	0	0	4	0.15	10	0.35
BMK_Unigene_005636	0	0	0	0	0	0	2	0.78	0	0	0	0	0	0	0	0	8	2.36	2	0.63	0	0	0	0
BMK_Unigene_005641	711	13.2	535	10.17	496	11.01	419	9.35	754	19.44	413	9.26	107	2.07	18	0.41	29	0.48	82	1.57	50	0.95	20	0.35
BMK_Unigene_005645	2	0.39	10	2.03	4	0.94	2	0.48	2	0.52	0	0	0	0	0	0	0	0	0	0	0	0	6	1.07
BMK_Unigene_005647	4	0.12	0	0	0	0	0	0	0	0	0	0	46	1.46	27	0.99	19	0.52	35	1.1	59	1.81	28	0.8
BMK_Unigene_005650	142	4.45	78	2.52	71	2.69	211	7.96	171	7.42	228	8.66	5	0.19	9	0.35	0	0	23	0.74	0	0	28	0.83
BMK_Unigene_005652	48	11.05	35	8.17	27	7.25	6	1.73	33	10.02	37	10.41	53	12.18	40	10.18	49	10.12	67	15.06	51	11.25	50	10.13
BMK_Unigene_005653	30	1.58	8	0.43	10	0.63	1	0.06	52	3.77	7	0.45	0	0	4	0.25	0	0	1	0.05	0	0	0	0
BMK_Unigene_005654	4046	27.76	3530	24.82	3970	32.57	3375	27.82	2878	27.5	2718	22.52	1588	11.34	1668	13.72	2909	17.68	2580	18.14	2096	14.45	2611	16.69
BMK_Unigene_005659	1	0.37	3	1.13	0	0	0	0	5	2.37	4	2.25	2	0.74	0	0	2	0.68	1	0.36	0	0	0	0
BMK_Unigene_005666	1	0.23	1	0.24	0	0	13	3.64	0	0	0	0	5	1.17	4	1.03	0	0	0	0	8	1.79	0	0
BMK_Unigene_005673	114	14.19	85	10.76	146	21.47	52	7.9	64	10.82	61	9.16	67	8.51	93	13.31	98	10.91	93	11.58	73	8.92	75	8.45
BMK_Unigene_005674	1	0.08	0	0	0	0	2	0.18	0	0	2	0.19	3	0.24	9	0.81	2	0.14	13	1.01	28	2.13	36	2.53
BMK_Unigene_005675	2	0.1	0	0	0	0	1	0.06	0	0	0	0	0	0	55	3.25	13	0.58	38	1.93	2	0.1	13	0.6
BMK_Unigene_005676	12	0.55	1	0.05	7	0.38	1	0.06	2	0.13	3	0.2	2054	96.37	768	41.19	2530	102.01	1586	73.14	2874	129.99	502	21.01
BMK_Unigene_005677	268	4.65	702	12.47	5720	118.37	5124	106.68	250	6.02	997	20.85	4	0.07	1	0.02	16	0.25	42	0.75	2	0.05	10	0.16
BMK_Unigene_005687	3386	28.34	2773	23.79	2687	26.9	2353	23.68	2214	25.8	2303	23.28	1326	11.55	1483	14.88	1938	14.38	1170	10.04	2043	17.18	2004	15.63
BMK_Unigene_005688	1	0.38	0	0	0	0	0	0	7	3.45	0	0	0	0	0	0	0	0	0	0	0	0	3	1.01
BMK_Unigene_005695	342	10.04	385	11.58	232	8.13	88	3.11	263	10.68	172	6.1	76	2.34	61	2.16	58	1.51	122	3.67	111	3.26	146	3.98
BMK_Unigene_005697	1200	31.85	934	25.42	864	27.42	1029	32.86	640	23.56	1159	37.2	2789	76.88	1321	41.79	3838	90.5	3803	103.1	3106	82.6	2554	62.93
BMK_Unigene_005698	328	3.82	277	3.31	260	3.61	244	3.41	114	1.84	311	4.37	2074	25.05	3773	52.44	1217	12.52	2165	25.73	1363	15.9	1419	15.34
BMK_Unigene_005699	0	0	8	0.14	0	0	3	0.06	0	0	0	0	103	1.8	143	2.85	23	0.34	119	2.03	0	0	111	1.72
BMK_Unigene_005700	16	0.37	14	0.33	14	0.39	4	0.13	17	0.52	8	0.23	2131	48.65	1153	30.23	629	12.27	898	20.16	1522	33.53	1458	29.77
BMK_Unigene_005701	0	0	4	1.62	5	2.33	0	0	0	0	0	0	0	0	0	0	3	1.1	3	1.15	3	1.13	3	1.03
BMK_Unigene_005702	20	3.4	2	0.35	31	6.26	58	11.98	8	1.82	14	2.91	0	0	0	0	2	0.31	2	0.34	0	0	0	0
BMK_Unigene_005705	4	1.37	6	2.11	0	0	5	2.1	0	0	0	0	0	0	0	0	0	0	0	0	0	0	2	0.6
BMK_Unigene_005706	0	0	9	1.85	0	0	0	0	0	0	0	0	7	1.43	0	0	0	0	3	0.6	2	0.39	2	0.36
BMK_Unigene_005708	2	0.18	9	0.85	0	0	0	0	3	0.38	1	0.11	4	0.38	20	2.15	9	0.74	4	0.37	12	1.1	16	1.36
BMK_Unigene_005709	4202	45.72	2059	22.96	1180	15.36	1650	21.59	3240	49.06	1039	13.65	492	5.57	370	4.82	669	6.46	518	5.78	497	5.43	732	7.42
BMK_Unigene_005710	1478	21.3	2276	33.6	593	10.21	429	7.43	1473	29.49	856	14.89	1026	15.37	946	16.31	820	10.47	564	8.33	1053	15.23	1051	14.1
BMK_Unigene_005715	10	2.84	7	1.87	0	0	3	0.95	0	0	4	1.28	0	0	9	2.61	1	0.24	6	1.54	0	0	7	1.62
BMK_Unigene_005717	545	25.16	967	45.72	436	24	261	14.54	546	34.7	412	23	1119	53.49	904	49.44	409	16.83	412	19.36	388	17.9	691	29.5
BMK_Unigene_005719	6	0.15	9	0.22	0	0	4	0.12	13	0.44	4	0.12	702	17.76	447	12.99	517	11.19	442	11.02	375	9.17	560	12.66
BMK_Unigene_005725	517	8.24	455	7.44	453	8.64	576	11.04	319	7.07	541	10.42	611	10.14	542	10.35	2325	32.89	1230	20.06	1263	20.22	1189	17.63
BMK_Unigene_005728	0	0	4	0.5	0	0	0	0	20	3.32	0	0	3	0.38	0	0	0	0	4	0.5	0	0	0	0
BMK_Unigene_005731	0	0	4	0.5	3	0.44	16	2.36	0	0	9	1.33	0	0	0	0	2	0.22	0	0	0	0	0	0
BMK_Unigene_005734	63	2.18	128	4.54	45	1.86	68	2.83	67	3.21	29	1.21	22	0.79	10	0.41	19	0.58	5	0.18	5	0.17	23	0.74
BMK_Unigene_005737	31	2.48	0	0	13	1.24	2	0.19	0	0	10	0.97	3	0.25	0	0	3	0.21	0	0	0	0	0	0
BMK_Unigene_005740	393	8.7	731	16.58	300	7.94	163	4.34	590	18.12	243	6.5	31	0.72	151	3.99	384	7.55	214	4.86	21	0.48	319	6.57
BMK_Unigene_005741	12	0.23	29	0.58	23	0.54	82	1.89	35	0.93	42	0.98	496	9.83	232	5.28	1056	17.85	534	10.41	863	16.49	1543	27.33
BMK_Unigene_005743	0	0	0	0	0	0	0	0	1	0.21	0	0	0	0	0	0	0	0	0	0	0	0	17	2.45
BMK_Unigene_005746	10	1.95	0	0	0	0	1	0.24	2	0.52	4	0.95	2	0.4	0	0	3	0.53	0	0	0	0	1	0.18
BMK_Unigene_005752	5	0.32	5	0.33	1	0.08	19	1.47	2	0.18	0	0	3	0.2	0	0	13	0.79	34	2.22	3	0.19	11	0.65
BMK_Unigene_005753	357	6.88	1139	22.52	199	4.59	55	1.29	640	17.14	186	4.34	25	0.51	26	0.61	21	0.36	46	0.92	34	0.66	54	0.97
BMK_Unigene_005754	0	0	1	0.33	0	0	0	0	0	0	0	0	0	0	6	2.13	0	0	0	0	0	0	7	2
BMK_Unigene_005756	0	0	1	0.29	1	0.34	6	2.09	0	0	3	1.05	0	0	0	0	0	0	0	0	0	0	0	0
BMK_Unigene_005757	10	1.81	4	0.74	9	1.93	0	0	2	0.48	2	0.44	0	0	0	0	3	0.49	6	1.08	7	1.24	3	0.49
BMK_Unigene_005760	22	0.59	40	1.1	10	0.32	24	0.78	23	0.86	15	0.49	544	15.23	246	7.92	229	5.48	161	4.45	152	4.1	222	5.57
BMK_Unigene_005769	12	3.35	0	0	0	0	2	0.68	12	4.38	4	1.37	0	0	0	0	0	0	0	0	0	0	0	0
BMK_Unigene_005770	1414	23.54	2162	36.86	113	2.27	117	2.34	1072	24.79	81	1.64	1908	33.02	546	10.86	956	14.12	235	4.01	1496	24.99	963	14.9
BMK_Unigene_005772	11	2.01	0	0	0	0	0	0	4	0.97	2	0.45	0	0	0	0	0	0	2	0.37	0	0	0	0
BMK_Unigene_005774	0	0	0	0	0	0	10	2.19	0	0	0	0	0	0	0	0	0	0	0	0	0	0	3	0.49
BMK_Unigene_005775	84	24.85	39	11.85	2	0.7	21	7.6	23	8.86	24	8.73	55	16.41	55	17.97	2	0.54	9	2.62	8	2.29	20	5.24
BMK_Unigene_005777	65	2.48	53	2.04	68	3.05	38	1.72	41	2.14	34	1.55	83	3.23	33	1.47	198	6.65	156	5.98	89	3.38	164	5.71
BMK_Unigene_005780	2	0.39	0	0	0	0	2	0.48	0	0	0	0	1	0.2	0	0	2	0.36	0	0	0	0	11	1.95
BMK_Unigene_005781	0	0	7	1.21	2	0.4	1	0.2	2	0.45	0	0	14	2.41	13	2.5	4	0.61	17	2.86	3	0.5	3	0.46
BMK_Unigene_005785	0	0	4	0.4	1	0.12	1	0.12	0	0	0	0	15	1.5	17	1.92	7	0.61	9	0.88	0	0	15	1.33
BMK_Unigene_005786	0	0	1	0.06	0	0	9	0.64	0	0	0	0	33	2.01	4	0.28	6	0.31	5	0.3	10	0.59	0	0
BMK_Unigene_005787	0	0	0	0	0	0	5	1.97	0	0	0	0	0	0	0	0	0	0	0	0	0	0	0	0
BMK_Unigene_005791	22	0.43	15	0.3	11	0.25	20	0.47	25	0.67	35	0.82	104	2.1	131	3.04	9	0.15	149	2.96	17	0.33	57	1.03
BMK_Unigene_005792	3774	35.37	3665	35.2	1718	19.26	948	10.68	3983	51.96	1972	22.32	3629	35.4	3017	33.88	3148	26.15	2534	24.32	3223	30.35	3432	29.96
BMK_Unigene_005793	0	0	4	1.36	0	0	0	0	0	0	6	2.45	0	0	0	0	0	0	0	0	0	0	8	2.34
BMK_Unigene_005811	178	1.94	450	5.03	93	1.21	79	1.04	491	7.46	139	1.84	421	4.78	379	4.96	682	6.6	451	5.04	515	5.64	686	6.97
BMK_Unigene_005816	772	35.74	720	34.19	531	29.39	467	26.1	565	36.1	626	35.1	722	34.68	386	21.18	940	38.82	246	11.61	428	19.85	544	23.29
BMK_Unigene_005817	314	6.43	354	7.44	153	3.76	63	1.57	323	9.19	143	3.55	186	3.97	144	3.53	75	1.37	99	2.07	107	2.2	79	1.5
BMK_Unigene_005824	4	0.66	2	0.34	2	0.39	1	0.2	7	1.54	0	0	0	0	4	0.75	15	2.23	1	0.16	0	0	0	0
BMK_Unigene_005826	3476	16.3	1454	6.99	1799	10.09	4051	22.83	933	6.1	2279	12.9	1954	9.54	1648	9.27	3786	15.73	3966	19.06	1876	8.84	4310	18.84
BMK_Unigene_005835	149	4.38	245	7.38	37	1.31	28	1.02	237	9.67	73	2.59	82	2.52	16	0.58	19	0.51	6	0.19	28	0.83	15	0.42
BMK_Unigene_005839	1	0.08	4	0.33	8	0.76	2	0.19	19	2.08	1	0.1	0	0	1	0.09	5	0.36	14	1.14	4	0.32	1	0.07
BMK_Unigene_005842	24	1.35	214	12.33	64	4.29	394	26.72	387	29.91	423	28.81	1	0.06	9	0.6	65	3.26	67	3.83	0	0	333	17.33
BMK_Unigene_005843	568	12.04	1313	28.5	478	12.11	470	11.98	705	20.74	835	21.38	1015	22.34	766	19.39	1098	20.64	866	18.75	830	17.65	1025	20.18
BMK_Unigene_005849	0	0	6	1.83	0	0	0	0	0	0	0	0	0	0	0	0	0	0	2	0.59	0	0	0	0
BMK_Unigene_005850	2	0.07	7	0.25	0	0	6	0.25	3	0.14	4	0.17	0	0	1	0.04	42	1.33	61	2.16	4	0.14	0	0
[truncated: 50,251 more rows]

## Sheet: Table S2
Table S2 Identified DEGs between ACS and AC
#ID	ACS1_count	ACS2_count	ACS3_count	ACS4_count	ACS5_count	ACS6_count	AC1_count	AC2_count	AC3_count	AC4_count	AC5_count	AC6_count	log2(fc)	PValue	FDR	regulated	nr_annotation
BMK_Unigene_000002	1325	2376	577	874	408	1055	513	825	114	339	284	200	-1.5855	0.00227249	0.00705599	down	F-box protein SKIP27-like [Quercus suber]
BMK_Unigene_000005	587	1172	86	94	3314	208	607	268	52	67	283	529	-1.8969	0.0329084	0.0749487	down	PREDICTED: oligopeptide transporter 3 [Nicotiana tabacum]
BMK_Unigene_000026	98	81	62	79	79	84	857	544	1944	775	1197	1761	3.6208	2.72595e-32	1.28526e-30	up	hypothetical protein CICLE_v10004938mg [Citrus clementina]
BMK_Unigene_000035	1421	919	1001	1797	898	1278	109	79	317	221	85	102	-3.2479	6.39416e-16	8.86554e-15	down	uncharacterized protein LOC110600074 [Manihot esculenta]
BMK_Unigene_000045	783	892	718	967	565	1095	1079	833	2033	2800	1976	1505	0.8058	0.0186911	0.0460195	up	60S ribosomal protein [Phaseolus vulgaris]
BMK_Unigene_000047	148	273	92	181	129	242	461	401	1252	1205	826	652	1.9508	3.63488e-08	2.35403e-07	up	PREDICTED: 28S ribosomal protein S29, mitochondrial isoform X1 [Nelumbo nucifera]
BMK_Unigene_000055	316	324	464	579	102	463	50	60	6	118	38	49	-2.9592	1.7822e-07	1.0629e-06	down	PREDICTED: tyrosine-sulfated glycopeptide receptor 1 isoform X1 [Ricinus communis]
BMK_Unigene_000069	21	22	3	15	2	10	0	2	0	0	0	0	-5.0444	1.8289e-05	8.28728e-05	down	hypothetical protein CFP56_47126 [Quercus suber]
BMK_Unigene_000076	65	9	5	34	66	10	149	172	203	279	163	267	2.4626	6.77461e-06	3.27692e-05	up	PREDICTED: elongator complex protein 6 [Ipomoea nil]
BMK_Unigene_000095	507	406	94	47	340	104	872	822	1401	983	1205	988	1.8918	5.82171e-06	2.84215e-05	up	PREDICTED: ankyrin-3 [Vitis vinifera]
BMK_Unigene_000101	12	15	5	17	0	36	1105	219	89	180	423	50	4.4674	5.75235e-08	3.64025e-07	up	PREDICTED: U-box domain-containing protein 11 [Ziziphus jujuba]
BMK_Unigene_000105	0	0	5	4	0	1	296	226	404	216	375	367	7.2934	1.89441e-33	9.64577e-32	up	PREDICTED: uncharacterized protein LOC100249600 [Vitis vinifera]
BMK_Unigene_000126	243	129	150	303	138	147	877	1058	1243	1537	950	1044	2.3978	1.43176e-12	1.47303e-11	up	PREDICTED: uncharacterized protein LOC100258847 isoform X3 [Vitis vinifera]
BMK_Unigene_000130	734	798	623	510	1096	651	1458	1415	1562	1533	1525	1525	0.8054	5.60583e-05	0.00023483	up	CCR4-NOT transcription complex subunit 11-like [Chenopodium quinoa]
BMK_Unigene_000141	326	607	162	101	381	159	134	206	195	158	114	235	-0.9125	0.0273265	0.0639152	down	Per1-like protein [Corchorus capsularis]
BMK_Unigene_000155	67	48	23	20	66	21	624	418	670	540	590	640	3.6133	1.6186e-34	8.86111e-33	up	serine/threonine-protein kinase BLUS1 isoform X2 [Citrus clementina]
BMK_Unigene_000159	6	34	11	9	15	20	178	155	193	249	276	207	3.5271	6.1714e-22	1.36521e-20	up	uncharacterized protein LOC105156766 [Sesamum indicum]
BMK_Unigene_000170	1730	1136	1748	2118	742	1582	396	446	770	451	372	686	-1.7534	1.93989e-07	1.1508e-06	down	DnaJ like subfamily C member 3 [Glycine soja]
BMK_Unigene_000172	0	5	7	4	8	1	0	0	0	0	0	0	-8.2046	0.00480919	0.0138529	down	PREDICTED: uncharacterized protein LOC109147246 [Ipomoea nil]
BMK_Unigene_000178	1	7	21	7	14	6	162	78	82	101	140	140	3.3725	6.16241e-10	4.86126e-09	up	PREDICTED: uncharacterized protein LOC109240213 [Nicotiana attenuata]
BMK_Unigene_000180	75	101	39	37	65	95	207	273	280	369	373	268	1.9181	2.8238e-12	2.8154e-11	up	hypothetical protein VITISV_006076 [Vitis vinifera]
BMK_Unigene_000185	842	458	361	81	298	238	147	268	27	60	86	239	-1.5474	0.00857054	0.0231933	down	PREDICTED: phospholipase A(1) LCAT3 [Ricinus communis]
BMK_Unigene_000202	8	21	26	5	28	19	885	872	363	519	1235	1158	5.3225	2.06549e-30	8.58679e-29	up	phytochrome E isoform X2 [Prunus persica]
BMK_Unigene_000207	105	302	94	195	130	164	1671	1121	1246	644	1087	1708	2.7246	2.25473e-15	2.97333e-14	up	PREDICTED: branched-chain-amino-acid aminotransferase-like protein 1 isoform X1 [Nicotiana tomentosiformis]
BMK_Unigene_000209	2547	5701	1096	888	3060	3608	285	967	35	102	90	80	-3.4619	3.00795e-06	1.53034e-05	down	putative calcium-binding protein CML19 [Vigna radiata var. radiata]
BMK_Unigene_000213	219	129	89	139	120	144	521	370	2159	1465	1324	697	2.7243	8.07665e-12	7.67862e-11	up	unnamed protein product [Coffea canephora]
BMK_Unigene_000214	131	138	75	112	91	82	2975	2396	2141	2632	3204	3096	4.529	1.21076e-107	2.46839e-104	up	PREDICTED: zinc finger CCCH domain-containing protein 44 [Vitis vinifera]
BMK_Unigene_000229	543	520	405	430	366	381	374	420	426	253	327	314	-0.5014	0.0236407	0.0564318	down	PREDICTED: hydroxyproline O-galactosyltransferase GALT6-like [Daucus carota subsp. sativus]
BMK_Unigene_000245	20	29	6	15	4	22	2	1	0	0	4	0	-3.8745	2.25651e-05	0.000100824	down	PREDICTED: ethylene-responsive transcription factor ERF003 [Malus domestica]
BMK_Unigene_000248	2035	1829	1294	1130	1479	1281	127	98	100	94	143	157	-3.8453	1.57364e-97	2.00514e-94	down	hypothetical protein EUGRSUZ_H009501, partial [Eucalyptus grandis]
BMK_Unigene_000251	907	969	442	182	831	310	201	267	127	116	193	245	-1.8197	7.91531e-06	3.7877e-05	down	PREDICTED: uncharacterized protein LOC104905261 [Beta vulgaris subsp. vulgaris]
BMK_Unigene_000252	3528	2742	2543	3042	2381	2469	3602	3422	3445	6115	5296	6504	0.5637	0.0293983	0.0681017	up	uncharacterized protein LOC105647118 [Jatropha curcas]
BMK_Unigene_000254	0	0	0	0	0	2	322	232	462	334	358	494	9.8138	1.17639e-28	4.24334e-27	up	unnamed protein product [Coffea canephora]
BMK_Unigene_000262	1541	1162	1256	1232	1066	1145	901	891	1313	1078	845	989	-0.5048	0.00990783	0.0263864	down	ATP-dependent zinc metalloprotease FTSH 4, mitochondrial-like [Manihot esculenta]
BMK_Unigene_000271	0	1	2	4	0	0	22	8	2	9	3	9	2.7142	0.0178532	0.0442106	up	probable pectinesterase 53 [Hevea brasiliensis]
BMK_Unigene_000278	671	600	856	538	538	549	39	27	89	81	46	17	-3.8783	9.37893e-23	2.21206e-21	down	40S ribosomal protein S24-1 [Helianthus annuus]
BMK_Unigene_000285	59	62	8	53	81	61	130	100	117	227	170	123	1.1985	0.00316081	0.00950724	up	PREDICTED: RNA-binding protein 28 isoform X1 [Vitis vinifera]
BMK_Unigene_000288	1464	773	1309	1547	863	1078	69	91	90	8	69	244	-3.8539	8.30204e-13	8.7317e-12	down	PREDICTED: peroxisomal membrane protein 11D-like [Malus domestica]
BMK_Unigene_000313	7	15	3	0	30	11	0	0	0	7	0	0	-3.5097	0.0251224	0.0594226	down	PREDICTED: uncharacterized protein LOC101264722 isoform X2 [Solanum lycopersicum]
BMK_Unigene_000336	62	52	27	64	89	33	185	215	473	223	289	407	2.1872	3.67939e-10	2.97149e-09	up	hypothetical protein AQUCO_01000127v1 [Aquilegia coerulea]
BMK_Unigene_000343	20	13	1	15	7	1	236	404	26	198	245	360	4.5993	2.40977e-11	2.18621e-10	up	dihydroneopterin aldolase 1-like isoform X1 [Arachis ipaensis]
BMK_Unigene_000355	21	10	15	7	36	25	0	0	0	21	1	0	-2.6106	0.0337843	0.0766694	down	uncharacterized protein LOC105163081 [Sesamum indicum]
BMK_Unigene_000359	44	30	17	18	31	26	117	118	266	241	306	199	2.6962	1.14934e-17	1.83809e-16	up	protein arginine n-methyltransferase 1.6 [Quercus suber]
BMK_Unigene_000360	1079	1038	735	889	741	898	469	320	469	455	472	465	-1.2207	3.94412e-15	5.0905e-14	down	phosphatidylinositol 4-kinase beta 1-like isoform X1 [Manihot esculenta]
BMK_Unigene_000365	126	188	72	50	176	64	437	319	210	337	407	403	1.4525	6.56633e-06	3.18251e-05	up	PREDICTED: uncharacterized protein LOC104905261 [Beta vulgaris subsp. vulgaris]
BMK_Unigene_000383	0	8	13	9	17	10	85	41	193	77	54	67	2.8395	2.12787e-06	1.10565e-05	up	PREDICTED: histone-lysine N-methyltransferase, H3 lysine-9 specific SUVH6-like [Nicotiana attenuata]
BMK_Unigene_000384	0	9	0	7	10	1	66	48	145	195	129	185	4.5362	5.04025e-11	4.43505e-10	up	hypothetical protein VITISV_040899 [Vitis vinifera]
BMK_Unigene_000386	178	286	125	297	152	185	895	765	2966	1431	1393	1173	2.5787	1.87653e-12	1.90524e-11	up	hypothetical protein Ccrd_004959 [Cynara cardunculus var. scolymus]
BMK_Unigene_000389	23	32	3	13	37	7	130	84	39	86	106	115	2.0814	1.88935e-05	8.53691e-05	up	beta-glucosidase 2 GH1 family, partial [Camellia sinensis]
BMK_Unigene_000395	373	387	185	62	446	135	40	105	47	18	59	79	-2.3581	5.51571e-06	2.70182e-05	down	putative universal stress protein [Catharanthus roseus]
BMK_Unigene_000403	791	1081	342	321	947	582	121	111	99	104	109	131	-2.7823	2.12303e-22	4.84579e-21	down	PREDICTED: uncharacterized protein LOC100253529 isoform X1 [Vitis vinifera]
BMK_Unigene_000407	1527	1226	1053	1382	933	1185	138	55	212	132	44	61	-3.7338	1.68385e-22	3.88162e-21	down	PREDICTED: polyadenylation and cleavage factor homolog 4 isoform X1 [Vitis vinifera]
BMK_Unigene_000413	3551	2904	3293	4331	1848	3048	923	766	1162	1235	1239	1125	-1.7601	8.88439e-11	7.63093e-10	down	PREDICTED: AP-2 complex subunit alpha-1-like [Nicotiana tomentosiformis]
BMK_Unigene_000421	495	345	344	278	263	251	712	711	540	974	1105	979	1.1711	4.58908e-06	2.27538e-05	up	PREDICTED: molybdenum cofactor sulfurase isoform X1 [Vitis vinifera]
BMK_Unigene_000444	199	221	111	100	174	136	364	420	305	343	428	382	1.079	1.77772e-07	1.06059e-06	up	PREDICTED: protein ALWAYS EARLY 3 [Vitis vinifera]
BMK_Unigene_000452	1617	1708	1118	1415	1873	1389	364	178	366	588	432	321	-2.2461	4.26696e-17	6.50939e-16	down	putative DEAD-box ATP-dependent RNA helicase 29 [Arachis ipaensis]
BMK_Unigene_000460	594	751	181	186	1300	249	103	63	154	77	67	38	-2.9677	1.08099e-08	7.44037e-08	down	alpha-aminoadipic semialdehyde synthase-like isoform X1 [Herrania umbratica]
BMK_Unigene_000468	83	100	61	55	63	58	12	23	13	46	39	32	-1.523	4.98923e-05	0.00021061	down	F-box domain, cyclin-like protein [Cynara cardunculus var. scolymus]
BMK_Unigene_000472	1769	2269	1283	1417	1089	1838	352	143	416	459	490	207	-2.4234	3.10703e-15	4.04908e-14	down	Adaptin_N domain-containing protein/Gamma-COP domain-containing protein [Cephalotus follicularis]
BMK_Unigene_000474	716	654	224	96	990	136	135	88	90	64	98	130	-2.4388	2.25951e-06	1.16893e-05	down	PP2C domain-containing protein [Cephalotus follicularis]
BMK_Unigene_000480	130	301	99	96	85	187	930	598	443	317	487	784	1.835	3.35634e-07	1.93448e-06	up	LOW QUALITY PROTEIN: cellulose synthase A catalytic subunit 3 [UDP-forming]-like [Carica papaya]
BMK_Unigene_000482	0	4	37	8	0	2	89	40	86	79	198	276	3.6435	0.000279506	0.00103969	up	Retrotransposable element Tf2 [Cajanus cajan]
BMK_Unigene_000495	153	89	57	100	51	132	176	169	173	300	177	230	0.9035	0.0052765	0.0150444	up	RNA-binding protein 1 [Arachis duranensis]
BMK_Unigene_000499	14	1	0	0	0	0	24	12	87	15	50	4	3.6231	0.00137252	0.00446765	up	PREDICTED: B3 domain-containing transcription factor FUS3-like isoform X1 [Juglans regia]
BMK_Unigene_000502	118	164	72	78	104	93	102	64	53	41	68	75	-0.8178	0.0041542	0.0121587	down	Uncharacterized protein TCM_002533 isoform 5, partial [Theobroma cacao]
BMK_Unigene_000511	341	74	47	22	73	39	29	15	14	83	27	22	-1.747	0.00670918	0.0186483	down	PREDICTED: leucine-rich repeat receptor protein kinase EMS1 [Vitis vinifera]
BMK_Unigene_000516	227	814	41	35	247	222	1151	599	669	145	723	642	1.1754	0.0347165	0.0784565	up	kinesin-like protein KIN-4A isoform X5 [Hevea brasiliensis]
BMK_Unigene_000522	6	22	0	4	0	0	159	77	27	90	110	38	3.9578	5.629e-06	2.75441e-05	up	PREDICTED: ACT domain-containing protein ACR8-like isoform X2 [Nicotiana tomentosiformis]
BMK_Unigene_000530	43	43	47	33	27	49	8	11	32	43	33	18	-0.9594	0.026798	0.0628607	down	PREDICTED: uncharacterized protein LOC104421610 [Eucalyptus grandis]
BMK_Unigene_000540	4	26	2	6	0	10	195	50	1	4	11	5	2.4337	0.0276155	0.0644964	up	BnaC01g36510D [Brassica napus]
BMK_Unigene_000558	95	90	44	38	49	44	10	9	10	11	18	15	-2.4702	3.42808e-13	3.71987e-12	down	Oxysterol-binding protein [Trema orientalis]
BMK_Unigene_000564	1728	1281	1291	1303	1172	1164	2567	1760	4430	3210	3392	2997	0.9865	1.22131e-05	5.68421e-05	up	peroxisome biogenesis protein 5 [Sesamum indicum]
BMK_Unigene_000601	81	74	55	65	132	63	11	5	13	36	5	35	-2.4366	3.37e-06	1.70112e-05	down	alpha-ketoglutarate-dependent dioxygenase alkB homolog 6-like [Quercus suber]
BMK_Unigene_000603	377	207	242	185	121	150	903	717	822	574	723	750	1.6478	6.58859e-09	4.64399e-08	up	uncharacterized protein LOC110612809 [Manihot esculenta]
BMK_Unigene_000606	6	8	1	4	0	0	445	268	589	506	490	399	7.0501	2.50265e-47	3.0013e-45	up	F-box/LRR-repeat protein 4 [Manihot esculenta]
BMK_Unigene_000610	9	1	0	2	3	0	50	35	110	97	90	86	4.7922	5.17253e-14	6.03695e-13	up	rho GTPase-activating protein 2-like, partial [Herrania umbratica]
BMK_Unigene_000612	1977	4272	378	354	7037	664	9099	10891	2704	3665	3401	11029	1.2488	0.0374066	0.0836937	up	aquaporin protein 11 [Camellia sinensis]
BMK_Unigene_000614	89	35	51	38	39	17	487	479	1057	856	773	1500	4.0482	7.25131e-26	2.1388e-24	up	transcription factor MYBS3 [Sesamum indicum]
BMK_Unigene_000625	5	12	4	1	11	7	125	128	158	152	118	126	4.1113	8.41007e-28	2.83871e-26	up	uncharacterized protein LOC111388670 isoform X1 [Olea europaea var. sylvestris]
BMK_Unigene_000633	36	39	23	21	46	20	78	67	150	97	84	104	1.4075	9.09275e-07	4.964e-06	up	hypothetical protein MANES_14G094300 [Manihot esculenta]
BMK_Unigene_000643	0	2	0	0	2	0	121	46	7	22	10	11	5.5677	8.24612e-07	4.5319e-06	up	uncharacterized protein LOC105157258 [Sesamum indicum]
BMK_Unigene_000675	400	499	151	149	454	226	33	14	0	30	35	27	-3.9353	7.02199e-12	6.7047e-11	down	Aspartic peptidase [Trema orientalis]
BMK_Unigene_000690	0	0	0	0	2	0	1	0	1	11	2	14	3.3487	0.0427294	0.0938033	up	PREDICTED: mitochondrial arginine transporter BAC2 [Ipomoea nil]
BMK_Unigene_000691	714	260	868	1820	364	596	28	21	18	62	0	17	-5.1823	2.46392e-13	2.7059e-12	down	unnamed protein product, partial [Vitis vinifera]
BMK_Unigene_000716	374	59	136	1720	36	243	12	17	43	36	19	34	-4.2428	2.29862e-08	1.52246e-07	down	polyprotein-like [Solanum chilense]
BMK_Unigene_000741	56	38	75	117	28	35	5	0	0	1	0	0	-6.0236	1.52292e-11	1.41025e-10	down	MYB4 [Fagopyrum tataricum]
BMK_Unigene_000753	974	906	879	771	552	1262	1863	1140	3248	2947	2067	2559	1.1474	9.88279e-05	0.000397652	up	PREDICTED: uncharacterized protein LOC109229359 [Nicotiana attenuata]
BMK_Unigene_000762	4174	4362	2957	2333	3946	2380	774	1272	441	1154	548	1283	-2.0461	1.92647e-09	1.44565e-08	down	PREDICTED: SNF2 domain-containing protein CLASSY 1-like [Ipomoea nil]
BMK_Unigene_000763	0	0	1	7	8	1	157	135	175	189	200	143	5.528	5.74022e-18	9.39523e-17	up	unnamed protein product, partial [Vitis vinifera]
BMK_Unigene_000775	1935	2300	1527	1358	1532	1442	664	620	1018	766	961	1122	-1.1787	7.63923e-12	7.27904e-11	down	uncharacterized protein LOC111369332 [Olea europaea var. sylvestris]
BMK_Unigene_000776	2	0	0	2	0	0	8	0	558	34	111	18	7.2042	3.94963e-07	2.25375e-06	up	PREDICTED: vignain [Vitis vinifera]
BMK_Unigene_000821	17	22	19	8	15	5	0	0	0	2	0	0	-5.5699	3.94175e-07	2.24976e-06	down	unnamed protein product [Coffea canephora]
BMK_Unigene_000830	42	170	44	37	90	50	285	115	117	90	231	156	1.015	0.0123385	0.0320149	up	PREDICTED: NAD-dependent protein deacylase SRT2 isoform X2 [Pyrus x bretschneideri]
BMK_Unigene_000831	3	4	53	25	7	49	195	331	327	184	390	381	3.4308	8.8534e-07	4.84215e-06	up	PREDICTED: RNA polymerase sigma factor sigE, chloroplastic/mitochondrial [Capsicum annuum]
BMK_Unigene_000844	1161	1188	386	470	364	620	44	57	39	43	41	67	-3.9731	4.11443e-36	2.52352e-34	down	PREDICTED: endoglucanase 2 [Nicotiana sylvestris]
BMK_Unigene_000850	1715	1599	1340	1074	1664	1200	361	376	599	337	375	451	-2.0015	8.34768e-25	2.28744e-23	down	PREDICTED: mitotic checkpoint protein BUB3.2-like [Ipomoea nil]
BMK_Unigene_000862	223	559	147	330	140	275	5170	1080	6214	1841	3773	3971	3.5087	3.78521e-16	5.35306e-15	up	hypothetical protein CDL12_08398 [Handroanthus impetiginosus]
BMK_Unigene_000873	295	474	189	266	185	327	126	109	352	144	232	166	-0.8349	0.00955746	0.0255561	down	PREDICTED: 28S ribosomal protein S29, mitochondrial isoform X3 [Nelumbo nucifera]
BMK_Unigene_000875	45	56	34	79	37	51	233	164	136	259	228	248	1.8727	1.94075e-08	1.29777e-07	up	mitochondrial import inner membrane translocase subunit TIM10-like [Olea europaea var. sylvestris]
BMK_Unigene_000886	136	94	66	113	89	78	0	0	48	0	29	21	-2.8657	0.00293974	0.00890431	down	hypothetical protein PanWU01x14_019910 [Parasponia andersonii]
BMK_Unigene_000890	2	0	10	6	11	11	124	71	93	53	56	88	3.2971	3.465e-08	2.24974e-07	up	PREDICTED: uncharacterized protein LOC8280982 isoform X1 [Ricinus communis]
BMK_Unigene_000905	8	11	15	12	3	10	0	4	0	0	1	0	-3.5236	0.000597395	0.0020915	down	hypothetical protein LR48_Vigan09g156500 [Vigna angularis]
BMK_Unigene_000911	7	14	27	35	10	34	971	1330	2159	1904	1856	1560	6.0246	2.25227e-38	1.60326e-36	up	DNA-directed RNA polymerase III subunit 2 [Olea europaea var. sylvestris]
BMK_Unigene_000916	0	0	3	1	7	3	4	1	54	21	25	45	2.9599	0.00252127	0.00775852	up	PREDICTED: 5&apos; exonuclease Apollo isoform X1 [Theobroma cacao]
BMK_Unigene_000917	19	25	51	76	15	48	2	5	15	6	3	12	-2.7279	1.37929e-05	6.36945e-05	down	PREDICTED: sucrose synthase 2 [Vitis vinifera]
BMK_Unigene_000939	2	4	2	3	0	3	188	84	580	113	122	115	6.1777	6.16493e-21	1.27522e-19	up	PREDICTED: 50S ribosomal protein L28, chloroplastic [Eucalyptus grandis]
BMK_Unigene_000946	1395	1165	689	417	1271	469	169	125	85	98	127	131	-3.0562	6.11387e-21	1.26517e-19	down	uncharacterized protein LOC106764342 [Vigna radiata var. radiata]
BMK_Unigene_000961	3	2	4	0	0	3	70	44	65	15	11	29	4.1293	9.94681e-08	6.1206e-07	up	hypothetical protein RCOM_1321060 [Ricinus communis]
BMK_Unigene_000968	1374	273	2730	1233	115	1349	36	33	76	71	227	28	-4.1172	1.32046e-09	1.00766e-08	down	PREDICTED: ras GTPase-activating protein-binding protein 1-like [Nelumbo nucifera]
BMK_Unigene_000969	4	13	0	8	5	0	850	448	546	699	1078	767	7.0303	1.37584e-40	1.12378e-38	up	Lycopene beta-cyclase [Handroanthus impetiginosus]
BMK_Unigene_000990	1	0	0	0	8	3	34	12	116	14	22	109	4.2022	4.54152e-06	2.25409e-05	up	hypothetical protein MIMGU_mgv1a011924mg [Erythranthe guttata]
BMK_Unigene_000999	359	235	356	749	245	342	175	222	309	182	196	275	-0.9755	0.00709082	0.0195852	down	gag-pol, partial [Camellia sinensis]
BMK_Unigene_001003	6	7	9	20	15	22	2646	2524	1104	995	1970	2482	6.9841	1.14966e-49	1.57093e-47	up	hypothetical protein T459_08030 [Capsicum annuum]
BMK_Unigene_001013	149	119	101	110	148	112	47	84	45	55	48	92	-1.1866	8.52017e-05	0.000346601	down	hypothetical protein (chloroplast) [Primula poissonii]
BMK_Unigene_001018	25	7	7	2	49	0	5	2	3	4	0	4	-2.6099	0.0158553	0.0398773	down	maf-like protein DDB_G0281937 isoform X4 [Carica papaya]
BMK_Unigene_001027	2298	2529	994	1642	1368	1082	583	548	784	1085	451	339	-1.5518	2.13564e-06	1.10946e-05	down	NADP-specific glutamate dehydrogenase [Carica papaya]
BMK_Unigene_001029	9	3	0	6	5	1	210	186	127	174	198	289	5.4451	1.88699e-29	7.2096e-28	up	unnamed protein product [Coffea canephora]
BMK_Unigene_001031	113	197	112	93	131	84	379	461	115	146	126	256	0.8904	0.0377501	0.0843769	up	uncharacterized protein DDB_G0271670-like [Durio zibethinus]
BMK_Unigene_001044	434	655	217	303	266	152	177	106	144	195	224	145	-1.1916	0.000155024	0.000603017	down	PREDICTED: serine protease SPPA, chloroplastic [Ipomoea nil]
BMK_Unigene_001050	520	363	127	162	496	143	73	81	44	40	26	70	-2.6092	3.9819e-09	2.88076e-08	down	hypothetical protein DCAR_022261 [Daucus carota subsp. sativus]
BMK_Unigene_001055	848	1748	879	1345	930	3013	183	110	158	65	280	269	-3.2694	3.54908e-14	4.2038e-13	down	hypothetical protein CISIN_1g012095mg [Citrus sinensis]
BMK_Unigene_001069	722	1952	784	785	3022	747	71	60	281	481	79	311	-2.9506	3.79682e-07	2.17166e-06	down	unnamed protein product, partial [Vitis vinifera]
BMK_Unigene_001079	470	430	373	593	285	500	2887	1906	7923	5163	5245	3486	3.0894	3.03015e-18	5.08029e-17	up	PREDICTED: glutamine--tRNA ligase isoform X2 [Vitis vinifera]
BMK_Unigene_001081	2035	1875	1643	1383	937	1764	443	255	584	470	563	466	-1.9932	5.02363e-17	7.60679e-16	down	hypothetical protein VITISV_036876 [Vitis vinifera]
BMK_Unigene_001088	209	425	88	89	218	130	32	63	105	31	81	74	-1.7787	3.05482e-05	0.000133463	down	unnamed protein product, partial [Vitis vinifera]
BMK_Unigene_001089	7	9	11	2	10	5	7	10	45	130	50	18	2.3268	0.00106698	0.00354765	up	PREDICTED: tRNA (guanine(26)-N(2))-dimethyltransferase isoform X2 [Ziziphus jujuba]
BMK_Unigene_001092	2808	3043	2107	1715	1663	2161	1190	643	896	529	1355	747	-1.5131	6.21809e-09	4.395e-08	down	Reticulon [Cynara cardunculus var. scolymus]
BMK_Unigene_001093	202	229	37	84	59	103	29	46	32	33	8	86	-1.7408	0.00101333	0.00338451	down	plant/T7H20-70 protein [Medicago truncatula]
BMK_Unigene_001098	24	30	14	37	27	23	22	16	93	76	56	139	1.0987	0.0301958	0.069683	up	unnamed protein product [Coffea canephora]
BMK_Unigene_001099	285	34	11	31	18	31	8	2	4	4	1	13	-3.777	2.34978e-06	1.21292e-05	down	hypothetical protein CQW23_26303 [Capsicum baccatum]
BMK_Unigene_001101	1091	842	948	815	592	934	1993	2039	2773	1674	1883	2278	1.0789	4.19223e-06	2.09009e-05	up	unnamed protein product, partial [Vitis vinifera]
BMK_Unigene_001107	70	27	24	25	47	26	530	681	53	366	281	305	3.2203	6.85388e-10	5.38091e-09	up	PREDICTED: L-type lectin-domain containing receptor kinase IX.1 [Juglans regia]
BMK_Unigene_001108	2	4	5	8	4	0	98	3	10	45	50	1	2.9592	0.0034199	0.0102034	up	hypothetical protein CDL12_06480 [Handroanthus impetiginosus]
BMK_Unigene_001122	106	161	87	23	85	109	938	787	1282	744	913	1262	3.1793	9.8522e-24	2.49328e-22	up	PREDICTED: SWR1-complex protein 4 [Vitis vinifera]
BMK_Unigene_001136	185	300	92	2	162	117	25	31	10	14	25	25	-2.8481	1.95825e-05	8.83257e-05	down	hypothetical protein CCACVL1_06482 [Corchorus capsularis]
BMK_Unigene_001139	0	6	4	8	0	8	64	47	93	89	88	64	3.8807	1.85011e-10	1.53978e-09	up	PREDICTED: uncharacterized protein LOC108201514 [Daucus carota subsp. sativus]
BMK_Unigene_001144	1021	895	856	1587	316	1291	1499	1255	2835	3294	2785	2368	1.0243	0.0188859	0.0464318	up	beta-glucuronosyltransferase GlcAT14B [Quercus suber]
BMK_Unigene_001147	1	21	32	21	57	32	16	9	0	9	2	3	-2.3	0.00873032	0.0235819	down	transcription factor bHLH68-like isoform X2 [Herrania umbratica]
BMK_Unigene_001149	5	0	0	1	0	0	5	21	110	23	2	19	4.7755	6.3151e-05	0.000262321	up	PREDICTED: uncharacterized protein LOC108477201 [Gossypium arboreum]
BMK_Unigene_001163	638	615	524	497	471	581	219	173	168	244	195	213	-1.6465	1.05449e-18	1.82931e-17	down	small nuclear ribonucleoprotein D2 [Populus trichocarpa]
BMK_Unigene_001171	812	509	546	176	638	383	2150	1486	2084	415	1100	1259	1.2723	0.00149772	0.00483169	up	SAM-dependent methyltransferase [Handroanthus impetiginosus]
BMK_Unigene_001173	79	73	96	46	79	42	910	1069	602	470	631	501	3.1656	1.0046e-18	1.74514e-17	up	beta-amylase 6 [Camellia sinensis]
BMK_Unigene_001188	71	68	26	155	84	14	233	292	782	819	149	685	2.5671	1.31452e-05	6.08966e-05	up	PREDICTED: protein timeless homolog [Vitis vinifera]
BMK_Unigene_001199	216	136	174	56	197	98	107	62	34	96	93	156	-0.8874	0.0316147	0.0724392	down	PREDICTED: uncharacterized protein LOC109219803 [Nicotiana attenuata]
BMK_Unigene_001201	941	668	925	2242	573	754	273	251	314	486	342	321	-1.8306	4.34874e-06	2.16346e-05	down	Double-stranded RNA-binding protein [Corchorus capsularis]
BMK_Unigene_001203	193	129	124	214	159	129	385	392	334	480	372	395	1.1163	4.959e-05	0.000209473	up	probable protein S-acyltransferase 7 [Ananas comosus]
BMK_Unigene_001212	193	270	83	62	281	152	23	22	28	32	45	37	-2.6986	1.14296e-12	1.1862e-11	down	Retrovirus-related Pol polyprotein from transposon TNT 1-94 [Apostasia shenzhenica]
BMK_Unigene_001219	1071	1014	859	1432	1357	1298	167	18	90	36	80	74	-4.1708	9.74909e-22	2.12256e-20	down	PREDICTED: 4-coumarate--CoA ligase-like 5 [Citrus sinensis]
BMK_Unigene_001233	121	140	65	96	17	75	593	606	231	423	509	171	2.2155	4.92945e-06	2.43265e-05	up	protein phosphatase 2c, putative [Ricinus communis]
BMK_Unigene_001236	458	752	405	318	313	519	1178	838	1569	821	1524	1300	1.1909	8.12924e-07	4.47056e-06	up	spermine synthase [Camellia sinensis]
BMK_Unigene_001244	116	151	52	62	187	91	17	3	6	5	6	12	-3.9808	1.70376e-17	2.681e-16	down	PREDICTED: pentatricopeptide repeat-containing protein At3g62890-like [Vitis vinifera]
BMK_Unigene_001251	92	51	129	43	33	116	41	38	92	40	16	23	-1.1106	0.0248499	0.0588683	down	PREDICTED: protein FMP32, mitochondrial-like [Nicotiana sylvestris]
BMK_Unigene_001259	86	225	102	203	164	132	0	4	0	5	0	1	-6.6133	1.0008e-22	2.35064e-21	down	chitinase 2 [Morus notabilis]
BMK_Unigene_001267	655	1496	44	6	1893	21	58	100	4	0	30	22	-4.3887	0.000173045	0.000668264	down	chlorophyll a-b binding protein 8, chloroplastic [Hevea brasiliensis]
BMK_Unigene_001270	2	141	11	0	40	42	843	352	249	224	576	1367	3.7598	4.92349e-06	2.42994e-05	up	cytochrome P450 90B1-like precursor [Populus euphratica]
BMK_Unigene_001272	322	365	263	222	295	390	3	72	22	21	6	108	-3.1841	1.20952e-06	6.4905e-06	down	protein SLOW GREEN 1, chloroplastic [Sesamum indicum]
BMK_Unigene_001282	0	0	0	0	0	0	1	0	4	17	0	3	7.8867	0.0494407	0.106266	up	hypothetical protein CISIN_1g021204mg [Citrus sinensis]
BMK_Unigene_001289	0	0	0	1	0	0	5	1	16	47	9	23	6.355	6.15167e-06	2.99167e-05	up	RecName: Full=Chalcone synthase; AltName: Full=Naringenin-chalcone synthase
BMK_Unigene_001295	179	347	95	31	307	91	53	77	61	45	35	38	-1.9423	0.000153831	0.000598784	down	protein NUCLEAR FUSION DEFECTIVE 6, chloroplastic/mitochondrial-like [Olea europaea var. sylvestris]
BMK_Unigene_001301	157	512	14	4	1085	26	22	16	7	0	7	5	-5.2228	1.08343e-06	5.849e-06	down	zf-CCHC domain-containing protein/DUF4219 domain-containing protein/UBN2 domain-containing protein [Cephalotus follicularis]
BMK_Unigene_001305	350	293	263	198	149	339	37	39	58	105	107	85	-2.0769	8.04459e-10	6.26362e-09	down	uncharacterized protein LOC105161668 [Sesamum indicum]
BMK_Unigene_001311	777	1001	363	327	1176	478	28	43	6	21	40	38	-4.7239	6.32136e-25	1.75579e-23	down	PREDICTED: AP-5 complex subunit zeta-1 [Juglans regia]
BMK_Unigene_001314	272	124	269	214	100	162	289	221	868	454	496	332	0.9908	0.0194764	0.0477063	up	PREDICTED: ubiquitin-conjugating enzyme E2 5B [Erythranthe guttata]
BMK_Unigene_001341	2749	2858	1709	1136	2416	1795	3930	2723	3747	2782	3974	3742	0.5237	0.00315065	0.00947892	up	PREDICTED: Niemann-Pick C1 protein isoform X2 [Vitis vinifera]
BMK_Unigene_001370	60	99	85	73	185	74	253	151	555	62	173	665	1.361	0.00667524	0.0185641	up	Epimerase domain-containing protein/Epimerase_Csub domain-containing protein [Cephalotus follicularis]
BMK_Unigene_001371	400	728	331	623	1232	797	712	242	3470	963	841	5625	1.1699	0.0456708	0.0992559	up	o-methyltransferase [Camellia sinensis]
BMK_Unigene_001384	17	9	15	7	11	17	8	4	3	5	10	0	-1.5049	0.0195972	0.0479521	down	myosin IB heavy chain-like [Cucurbita maxima]
BMK_Unigene_001390	509	314	240	229	306	367	116	25	152	196	144	103	-1.6374	1.28041e-05	5.93703e-05	down	PREDICTED: chaperonin 60 subunit alpha 2, chloroplastic [Theobroma cacao]
BMK_Unigene_001395	112	112	67	31	163	72	22	15	44	14	6	68	-2.0072	0.00031109	0.00114688	down	uncharacterized protein LOC112028474 [Quercus suber]
BMK_Unigene_001407	1180	2272	992	2304	509	1761	452	445	108	160	211	116	-2.6991	8.81589e-08	5.455e-07	down	hypothetical protein TanjilG_22417 [Lupinus angustifolius]
BMK_Unigene_001414	405	330	225	222	367	236	374	293	778	547	490	450	0.4844	0.0315617	0.0723406	up	hypothetical protein CRG98_005753 [Punica granatum]
BMK_Unigene_001416	0	0	42	374	3	0	0	0	0	2	0	0	-7.9179	0.00616546	0.0173107	down	PREDICTED: probable WRKY transcription factor 40 [Erythranthe guttata]
BMK_Unigene_001421	30	82	10	24	88	24	250	222	216	160	176	274	2.1003	7.65673e-07	4.22713e-06	up	hypothetical protein GOBAR_AA19036 [Gossypium barbadense]
BMK_Unigene_001428	21	27	25	17	58	17	825	275	758	449	958	438	4.2049	2.21359e-25	6.31351e-24	up	unnamed protein product [Coffea canephora]
BMK_Unigene_001450	86	188	64	37	159	44	61	22	2	10	80	12	-1.8003	0.0112283	0.0294551	down	hypothetical protein AQUCO_01700020v1 [Aquilegia coerulea]
BMK_Unigene_001451	16	25	3	14	14	4	2	5	4	1	9	4	-1.7632	0.0129618	0.0334399	down	PREDICTED: beta-D-glucosyl crocetin beta-1,6-glucosyltransferase-like [Nicotiana tomentosiformis]
BMK_Unigene_001458	83	129	65	63	156	101	306	253	293	630	441	298	1.6679	1.23964e-07	7.54141e-07	up	PREDICTED: uncharacterized protein LOC109155726 isoform X3 [Ipomoea nil]
BMK_Unigene_001461	19	86	0	0	52	19	0	0	3	0	0	0	-6.2817	0.000248085	0.000932545	down	PREDICTED: B-box zinc finger protein 20 isoform X1 [Ziziphus jujuba]
BMK_Unigene_001462	116	0	38	32	67	15	0	0	2	0	1	0	-6.809	1.6247e-07	9.74206e-07	down	reverse transcriptase [Corchorus capsularis]
BMK_Unigene_001469	15	31	8	9	4	0	39	41	70	59	45	99	2.2706	0.000114369	0.000455085	up	PREDICTED: kinesin-like protein KIN-8B isoform X2 [Vitis vinifera]
BMK_Unigene_001493	27	21	17	31	37	6	262	123	134	119	177	138	2.551	8.22653e-10	6.39746e-09	up	unnamed protein product, partial [Vitis vinifera]
BMK_Unigene_001497	788	662	386	317	474	565	1012	1095	1419	1054	815	1082	0.8396	2.37046e-05	0.000105517	up	DNA topoisomerase 1 [Sesamum indicum]
BMK_Unigene_001498	1229	1211	702	304	1152	710	121	187	238	107	125	107	-2.7756	1.31312e-15	1.77337e-14	down	fatty acid amide hydrolase [Olea europaea var. sylvestris]
BMK_Unigene_001500	273	169	146	107	201	130	8	4	83	50	96	18	-2.2405	0.00022811	0.000863064	down	PREDICTED: zinc finger protein CONSTANS-LIKE 13-like [Juglans regia]
BMK_Unigene_001502	845	683	466	319	467	577	4892	3830	8703	5154	7732	6073	3.2366	1.77962e-47	2.14937e-45	up	ubiquitin carboxyl-terminal hydrolase 12 [Morus notabilis]
BMK_Unigene_001510	233	325	152	161	203	254	1650	1285	1170	1086	1808	1410	2.4809	6.18293e-31	2.66159e-29	up	PREDICTED: protein strawberry notch isoform X1 [Vitis vinifera]
BMK_Unigene_001511	1332	1563	654	581	1218	768	761	899	895	495	791	757	-0.5908	0.0314471	0.0721233	down	uncharacterized protein LOC111004557 [Momordica charantia]
BMK_Unigene_001518	65	27	47	30	83	50	335	287	299	503	195	549	2.5961	1.65759e-12	1.69273e-11	up	hypothetical protein PRUPE_5G231800 [Prunus persica]
BMK_Unigene_001525	508	561	338	306	753	336	110	211	111	149	138	88	-1.9789	6.69177e-09	4.71021e-08	down	rRNA-processing protein UTP23 homolog isoform X2 [Sesamum indicum]
BMK_Unigene_001528	617	456	272	245	354	292	4	6	17	24	20	9	-5.0008	3.96838e-39	2.96569e-37	down	F-box/kelch-repeat protein At1g15670-like [Manihot esculenta]
BMK_Unigene_001533	299	281	214	219	236	232	94	57	86	119	154	77	-1.5362	6.26654e-10	4.93805e-09	down	uncharacterized protein C6G9.01c [Cajanus cajan]
BMK_Unigene_001562	6476	7827	4141	5225	3779	3343	717	467	207	1030	428	619	-3.3005	1.86489e-19	3.42892e-18	down	PREDICTED: E3 ubiquitin-protein ligase ATL6-like [Solanum tuberosum]
BMK_Unigene_001575	0	0	0	0	0	0	265	162	23	85	15	159	12.7983	1.33743e-15	1.80286e-14	up	21 kDa protein-like [Sesamum indicum]
BMK_Unigene_001584	3654	6201	977	1773	1630	1047	229	441	298	218	286	327	-3.1876	1.15305e-14	1.42816e-13	down	PREDICTED: putative 1-phosphatidylinositol-3-phosphate 5-kinase FAB1D [Vitis vinifera]
BMK_Unigene_001589	1481	2404	712	522	1823	969	418	244	289	267	237	285	-2.3738	3.00938e-13	3.28194e-12	down	&apos;photosystem I P700 apoprotein A1 (chloroplast) [Vicia sativa]
BMK_Unigene_001597	96	77	51	176	21	98	2	6	3	5	4	13	-4.1582	3.4744e-12	3.42058e-11	down	LRR receptor-like serine/threonine-protein kinase GSO2 isoform X2 [Hevea brasiliensis]
BMK_Unigene_001600	113	190	94	82	86	69	420	581	470	370	540	513	2.0318	3.51397e-15	4.55842e-14	up	CTP_transf_3 domain-containing protein [Cephalotus follicularis]
BMK_Unigene_001642	2135	2563	1510	2081	1138	2346	2550	969	893	1064	510	228	-1.069	0.0234709	0.0560968	down	galactan beta-1,4-galactosyltransferase GALS3 [Prunus persica]
BMK_Unigene_001645	1745	13	613	2026	15	1202	0	0	3	64	0	6	-6.4383	4.54832e-05	0.000193279	down	subtilisin-like protease SBT1.7 [Olea europaea var. sylvestris]
BMK_Unigene_001648	14	27	7	8	18	19	0	0	3	2	2	6	-3.1264	3.81322e-05	0.000164218	down	peroxisomal membrane protein PMP22 [Jatropha curcas]
BMK_Unigene_001649	5139	7967	3091	2391	3960	4755	348	263	810	574	765	476	-3.2835	1.41335e-27	4.69288e-26	down	PREDICTED: rRNA biogenesis protein RRP5 isoform X1 [Prunus mume]
BMK_Unigene_001660	122	121	47	20	125	40	3	0	0	0	8	1	-5.5181	7.25937e-12	6.92486e-11	down	PREDICTED: eukaryotic initiation factor 4A-3 [Ricinus communis]
BMK_Unigene_001661	2958	3276	2298	1445	2629	2554	7251	6255	9818	7333	8895	10429	1.5092	9.40968e-19	1.63795e-17	up	peptidyl-prolyl cis-trans isomerase isoform X1 [Quercus suber]
BMK_Unigene_001669	0	47	10	10	10	4	4	0	5	2	3	1	-2.6556	0.0091162	0.0245112	down	synaptotagmin-4 [Quercus suber]
BMK_Unigene_001677	413	404	266	178	455	278	1852	781	2050	1045	1291	822	1.7471	2.34097e-09	1.73649e-08	up	hypothetical protein L484_012581 [Morus notabilis]
BMK_Unigene_001686	38	55	71	62	42	65	666	556	205	634	494	592	3.0526	2.53381e-15	3.32598e-14	up	probable 28S rRNA (cytosine-C(5))-methyltransferase isoform X4 [Citrus clementina]
BMK_Unigene_001687	6	24	3	81	33	22	0	2	0	16	0	23	-2.3367	0.0381785	0.0852185	down	PREDICTED: ethylene-responsive transcription factor ERF113-like isoform X1 [Phoenix dactylifera]
BMK_Unigene_001689	1233	1169	744	792	1082	1025	1306	1160	1886	1499	1861	1408	0.3819	0.0111147	0.0291825	up	PREDICTED: reticulon-like protein B2 [Citrus sinensis]
BMK_Unigene_001693	2	6	4	1	0	3	993	765	2471	1850	1899	1392	9.0148	3.04337e-68	9.94322e-66	up	PREDICTED: uncharacterized protein LOC102606378 [Solanum tuberosum]
BMK_Unigene_001696	286	315	224	300	306	366	601	433	952	1057	893	713	1.1385	7.75851e-06	3.71825e-05	up	hypothetical protein VITISV_025726 [Vitis vinifera]
BMK_Unigene_001699	98	156	19	20	40	44	2072	3122	612	493	474	243	4.2113	7.35962e-11	6.37067e-10	up	hypothetical protein TanjilG_32264 [Lupinus angustifolius]
BMK_Unigene_001729	3	0	0	0	1	0	12	4	14	39	41	36	5.0583	2.05239e-06	1.06861e-05	up	probable pyruvate kinase, cytosolic isozyme [Carica papaya]
BMK_Unigene_001730	6	6	1	0	22	0	491	486	72	279	55	519	5.4927	8.12537e-11	7.00616e-10	up	uncharacterized protein LOC18054982 [Citrus clementina]
BMK_Unigene_001731	17	4	3	10	1	9	0	0	0	0	0	0	-8.8816	5.53907e-05	0.000232301	down	putative BPI/LBP family protein At1g04970 isoform X1 [Quercus suber]
BMK_Unigene_001736	82	32	31	57	52	11	677	718	1396	1174	924	796	4.2135	2.36415e-26	7.26316e-25	up	hypothetical protein CISIN_1g0144531mg, partial [Citrus sinensis]
BMK_Unigene_001737	10	12	6	4	13	7	304	215	87	220	341	180	4.5067	5.17532e-26	1.54889e-24	up	glutamate receptor 3.2-like [Quercus suber]
BMK_Unigene_001742	483	732	329	243	715	429	163	18	93	20	17	25	-3.3594	5.73261e-09	4.06483e-08	down	3-hydroxyisobutyryl-CoA hydrolase 1-like isoform X2 [Quercus suber]
BMK_Unigene_001750	506	685	414	314	483	477	320	297	383	347	339	328	-0.7126	1.02905e-05	4.84514e-05	down	PREDICTED: uncharacterized protein At1g10890-like [Populus euphratica]
BMK_Unigene_001768	23	2	2	32	18	9	177	180	64	141	156	122	3.0958	7.16108e-07	3.96681e-06	up	uncharacterized protein LOC18050291 [Citrus clementina]
BMK_Unigene_001777	6	0	0	3	1	0	2	4	90	636	86	29	6.2618	3.38702e-07	1.95128e-06	up	hypothetical protein CFP56_26307 [Quercus suber]
BMK_Unigene_001780	467	336	382	644	195	536	1377	822	31014	21143	4225	2520	4.2958	5.44838e-09	3.87406e-08	up	Pumilio RNA-binding repeat [Macleaya cordata]
BMK_Unigene_001786	1029	1014	702	936	926	896	564	570	954	633	598	596	-0.7073	0.00027541	0.00102551	down	AT-rich interactive domain-containing protein 5-like [Dorcoceras hygrometricum]
BMK_Unigene_001818	143	61	46	8	108	26	37	7	15	4	31	7	-2.1474	0.0018619	0.005888	down	PREDICTED: serine/threonine-protein kinase At5g01020-like, partial [Juglans regia]
BMK_Unigene_001826	0	1	0	0	3	0	256	215	28	102	50	162	7.3614	2.35166e-14	2.82954e-13	up	DNA-directed RNA polymerases IV and V subunit 4-like isoform X1 [Hevea brasiliensis]
BMK_Unigene_001829	716	593	466	494	518	463	144	194	325	202	240	249	-1.4746	2.5969e-12	2.59833e-11	down	PREDICTED: DNA topoisomerase 6 subunit B isoform X1 [Vitis vinifera]
BMK_Unigene_001835	1	1	3	0	1	0	1	7	34	18	8	13	3.453	0.000671474	0.00232989	up	unnamed protein product [Coffea canephora]
BMK_Unigene_001844	236	426	138	202	262	203	897	654	909	768	868	1423	1.7051	1.52998e-12	1.56964e-11	up	beta-carotene hydroxylase [Diospyros kaki]
BMK_Unigene_001845	5	3	0	0	0	0	0	0	17	5	2	56	3.1936	0.0446841	0.0974105	up	PREDICTED: ATP-dependent helicase BRM [Fragaria vesca subsp. vesca]
BMK_Unigene_001853	20	51	16	4	45	6	3	3	4	0	4	0	-3.5463	4.19218e-05	0.00017915	down	PREDICTED: probable glucuronoxylan glucuronosyltransferase IRX7 [Ziziphus jujuba]
BMK_Unigene_001855	2	9	3	11	0	4	6	5	7	126	6	41	2.5426	0.0126541	0.0327372	up	protein UPSTREAM OF FLC-like [Olea europaea var. sylvestris]
BMK_Unigene_001866	0	0	0	1	4	0	32	6	0	15	1	24	3.5538	0.00979567	0.0261204	up	glycerol-3-phosphate 2-O-acyltransferase 6-like [Olea europaea var. sylvestris]
BMK_Unigene_001883	10	107	57	11	35	41	4	3	14	3	7	24	-2.5045	0.000313926	0.0011565	down	CBS domain-containing protein/Voltage_CLC domain-containing protein [Cephalotus follicularis]
BMK_Unigene_001886	41	26	39	17	27	35	59	177	94	156	74	99	1.6721	3.8831e-05	0.000166917	up	protein tesmin/TSO1-like CXC 5 [Citrus clementina]
BMK_Unigene_001927	132	95	32	59	98	73	12	3	21	82	12	4	-2.0627	0.00252038	0.00775625	down	hypothetical protein CICLE_v10013660mg, partial [Citrus clementina]
BMK_Unigene_001932	431	161	214	217	174	333	5	0	18	48	11	8	-4.303	2.89746e-11	2.61192e-10	down	uncharacterized protein LOC110417205 isoform X1 [Herrania umbratica]
BMK_Unigene_001951	193	416	117	69	825	125	116	101	71	173	114	106	-1.6234	0.00485284	0.0139622	down	uncharacterized protein LOC111407807 [Olea europaea var. sylvestris]
BMK_Unigene_001968	115	139	96	74	83	95	584	376	432	719	385	753	2.2409	2.32693e-19	4.24023e-18	up	sister chromatid cohesion protein pds5 like b-b [Quercus suber]
BMK_Unigene_002033	774	507	445	183	766	487	103	71	38	19	68	69	-3.29	1.25839e-14	1.55485e-13	down	hypothetical protein POPTR_016G041900v3 [Populus trichocarpa]
BMK_Unigene_002036	1	25	0	5	12	14	3	0	2	0	2	2	-2.905	0.012224	0.0317518	down	serine/threonine-protein kinase [Camellia sinensis]
BMK_Unigene_002041	95	101	420	372	65	52	9	2	45	280	33	49	-1.6399	0.0394547	0.0876451	down	PREDICTED: uncharacterized protein LOC107013704 [Solanum pennellii]
BMK_Unigene_002045	0	0	0	4	7	0	7484	10978	3100	7753	4584	5217	11.4633	7.26162e-52	1.13183e-49	up	PREDICTED: amino acid permease 3-like [Daucus carota subsp. sativus]
BMK_Unigene_002058	187	48	177	30	52	28	7	2	0	0	0	4	-5.4463	1.36382e-10	1.14898e-09	down	Band 7 protein [Macleaya cordata]
BMK_Unigene_002062	97	109	24	6	111	39	149	284	201	73	106	216	1.2427	0.0134886	0.0346289	up	DNA (cytosine-5)-methyltransferase DRM2-like [Quercus suber]
BMK_Unigene_002068	2815	3410	1357	1269	2581	1352	4973	7981	8297	4451	7061	4327	1.3642	1.68325e-06	8.86647e-06	up	PREDICTED: uncharacterized protein LOC100260794 [Vitis vinifera]
BMK_Unigene_002083	83	27	134	124	19	107	20	32	90	27	34	17	-1.4087	0.0121265	0.0315226	down	endoribonuclease Dicer 2b [Solanum lycopersicum]
BMK_Unigene_002084	1937	2025	1264	1566	2056	1839	331	577	489	1109	597	599	-1.7295	6.25692e-09	4.42122e-08	down	putative H/ACA ribonucleoprotein complex subunit 1-like protein 1 [Lactuca sativa]
BMK_Unigene_002102	0	0	3	1	3	0	0	11	39	3	5	9	2.8309	0.0241066	0.057342	up	serine/threonine-protein kinase BLUS1-like [Hevea brasiliensis]
BMK_Unigene_002106	373	450	310	489	282	392	291	247	368	328	319	364	-0.4679	0.0304542	0.0702125	down	trafficking protein particle complex subunit 13 [Jatropha curcas]
BMK_Unigene_002114	0	3	2	6	13	0	32	51	907	345	76	1239	6.3209	4.17356e-11	3.70009e-10	up	isoform 2 of zinc transporter 8 [Quercus suber]
BMK_Unigene_002126	133	132	128	74	100	142	104	157	450	182	348	180	0.77	0.0316608	0.072535	up	hypothetical protein L484_008961 [Morus notabilis]
BMK_Unigene_002130	108	124	40	95	132	66	124	74	364	274	187	217	0.8746	0.0164672	0.0412331	up	PREDICTED: probable DNA primase large subunit [Daucus carota subsp. sativus]
BMK_Unigene_002139	453	366	216	179	358	228	581	431	751	234	550	457	0.5346	0.0445922	0.0972393	up	serine/threonine protein phosphatase 2A regulatory subunit B&apos;&apos;beta [Sesamum indicum]
BMK_Unigene_002141	66	57	21	3	79	36	6	2	3	0	6	0	-4.144	5.99716e-07	3.349e-06	down	high mobility group protein [Canavalia gladiata]
BMK_Unigene_002145	260	237	300	203	223	152	445	451	563	343	836	658	1.0488	0.000394298	0.00142701	up	auxin response factor 10 [Camellia sinensis]
BMK_Unigene_002154	239	218	27	107	358	35	33	48	81	64	54	63	-1.7666	0.00193131	0.00608714	down	PREDICTED: RING-H2 finger protein ATL58-like [Nicotiana attenuata]
BMK_Unigene_002163	38	78	39	15	60	32	121	102	210	133	33	158	1.3001	0.00196581	0.0061863	up	14 kDa zinc-binding protein [Quercus suber]
BMK_Unigene_002173	0	9	3	2	1	2	165	172	286	240	187	168	6.0008	4.21567e-32	1.96044e-30	up	BTB/POZ and MATH domain-containing protein 3-like [Durio zibethinus]
BMK_Unigene_002179	0	2	0	1	0	0	10	6	16	37	4	5	4.5754	0.00012554	0.000495473	up	Ethylene-responsive transcription factor LEP [Capsicum chinense]
BMK_Unigene_002181	907	655	2351	432	493	1021	802	548	689	533	620	671	-0.8083	0.0448331	0.0976936	down	PREDICTED: CLP protease regulatory subunit CLPX1, mitochondrial [Nicotiana attenuata]
BMK_Unigene_002184	119	115	99	90	134	95	217	216	204	250	225	270	0.8725	9.36384e-06	4.43423e-05	up	PREDICTED: protein MRG1 [Juglans regia]
BMK_Unigene_002238	1212	48	125	58	38	158	1	2	9	18	34	37	-4.1283	2.39377e-06	1.23431e-05	down	PREDICTED: acid phosphatase 1 [Eucalyptus grandis]
BMK_Unigene_002247	0	0	0	13	0	0	6	16	240	1317	7	92	6.7503	0.000843422	0.00286736	up	hypothetical protein CICLE_v10009497mg [Citrus clementina]
BMK_Unigene_002264	0	0	0	6	0	2	71	71	53	55	57	43	5.2108	6.85678e-11	5.96275e-10	up	PREDICTED: putative pentatricopeptide repeat-containing protein At4g17915 [Juglans regia]
BMK_Unigene_002277	116	63	35	74	33	56	599	601	266	198	931	453	2.8881	3.77261e-11	3.36393e-10	up	transcription factor TCP20-like [Durio zibethinus]
BMK_Unigene_002278	4646	3534	4028	4713	1966	4718	7511	9167	6871	7814	8745	6689	0.8194	0.0109252	0.0287518	up	PREDICTED: 14-3-3-like protein A [Theobroma cacao]
BMK_Unigene_002292	73	104	26	13	187	10	47	39	29	1	13	24	-1.6611	0.0483746	0.104248	down	PREDICTED: uncharacterized protein LOC103699074, partial [Phoenix dactylifera]
BMK_Unigene_002299	9	70	5	10	60	3	324	307	146	217	274	328	3.1411	3.26162e-07	1.88244e-06	up	PREDICTED: protein HESO1 [Vitis vinifera]
BMK_Unigene_002310	283	229	198	351	154	217	486	360	747	656	636	560	1.0554	0.000436799	0.0015688	up	PREDICTED: uncharacterized protein LOC100242269 [Vitis vinifera]
BMK_Unigene_002313	294	313	288	209	174	128	1455	1483	4211	8273	5276	6487	4.0629	9.36421e-21	1.90605e-19	up	PREDICTED: inositol transporter 1 isoform X2 [Ipomoea nil]
BMK_Unigene_002319	153	193	78	43	270	133	55	23	22	22	10	10	-2.8198	7.00219e-08	4.38007e-07	down	PREDICTED: triacylglycerol lipase 2 isoform X2 [Erythranthe guttata]
BMK_Unigene_002324	721	1086	2166	3487	776	3963	827	354	798	1420	1183	2051	-1.1437	0.0226977	0.0544506	down	probable inactive purple acid phosphatase 27 isoform X3 [Olea europaea var. sylvestris]
BMK_Unigene_002326	571	446	469	335	443	537	68	33	79	56	39	71	-3.2464	2.09768e-37	1.39575e-35	down	NADH dehydrogenase [ubiquinone] 1 beta subcomplex subunit 7-like [Chenopodium quinoa]
BMK_Unigene_002328	1951	2252	4581	4307	1143	4320	751	334	836	573	724	797	-2.4471	2.18381e-09	1.62631e-08	down	PREDICTED: 3-oxo-Delta(4,5)-steroid 5-beta-reductase [Glycine max]
BMK_Unigene_002331	35	9	1	1	1	16	59	112	46	56	48	99	2.6913	0.000151878	0.000591721	up	PREDICTED: cullin-1-like isoform X1 [Nicotiana tabacum]
BMK_Unigene_002333	38	39	18	20	79	9	145	164	270	170	151	307	2.2948	7.67674e-08	4.78498e-07	up	PREDICTED: cysteine--tRNA ligase, chloroplastic/mitochondrial isoform X2 [Vitis vinifera]
BMK_Unigene_002339	334	322	501	190	310	231	122	96	23	54	93	60	-2.2356	1.33409e-07	8.08128e-07	down	unnamed protein product, partial [Vitis vinifera]
BMK_Unigene_002342	132	83	96	34	105	72	235	208	582	381	286	338	1.7251	7.29182e-08	4.55397e-07	up	dexh-box atp-dependent rna helicase dexh15 chloroplastic [Quercus suber]
BMK_Unigene_002352	3	7	0	7	0	0	543	333	339	36	259	513	6.7944	3.1989e-17	4.92275e-16	up	uncharacterized protein LOC107624347 isoform X1 [Arachis ipaensis]
BMK_Unigene_002353	0	0	0	6	0	4	246	392	464	480	343	501	7.6516	2.10302e-30	8.72854e-29	up	PREDICTED: transmembrane protein 56 [Vitis vinifera]
BMK_Unigene_002362	582	1072	169	88	956	272	160	156	144	77	150	181	-2.0524	8.54418e-05	0.000347411	down	PREDICTED: titin-like isoform X1 [Gossypium hirsutum]
BMK_Unigene_002365	0	2	0	1	3	1	279	102	304	105	174	146	6.9873	6.39661e-25	1.77476e-23	up	methyl-CpG-binding domain-containing protein 2 isoform X1 [Sesamum indicum]
BMK_Unigene_002367	0	66	0	2	46	4	3	1	1	0	0	0	-4.7406	0.00266997	0.00817069	down	PREDICTED: bidirectional sugar transporter SWEET4-like isoform X1 [Gossypium raimondii]
BMK_Unigene_002371	38	66	16	73	104	79	681	659	706	600	897	633	3.2252	4.19393e-17	6.40181e-16	up	PREDICTED: adenylyltransferase and sulfurtransferase MOCS3 [Lupinus angustifolius]
BMK_Unigene_002378	455	379	126	87	912	200	0	1	4	29	1	1	-6.1706	8.10004e-12	7.69799e-11	down	uncharacterized protein LOC111411762 isoform X1 [Olea europaea var. sylvestris]
BMK_Unigene_002380	74	127	45	23	108	53	12	0	16	15	20	1	-2.9851	1.16422e-05	5.43888e-05	down	uncharacterized protein LOC110673845 isoform X1 [Hevea brasiliensis]
BMK_Unigene_002385	901	1269	558	371	1076	637	185	100	70	0	7	162	-3.3894	2.2599e-05	0.000100967	down	Transmembrane protein adipocyte-associated [Trema orientalis]
BMK_Unigene_002388	19	7	5	0	0	0	31	15	105	72	28	52	3.201	0.000256022	0.000958703	up	PREDICTED: uncharacterized protein LOC100250572 [Vitis vinifera]
BMK_Unigene_002394	231	283	150	258	195	204	2644	2408	4404	4571	6124	3384	3.9453	8.34533e-48	1.0274e-45	up	PREDICTED: uncharacterized protein LOC109219789 [Nicotiana attenuata]
BMK_Unigene_002400	106	105	72	56	116	37	179	253	255	407	188	337	1.5131	2.31163e-06	1.19419e-05	up	uncharacterized protein LOC111893013 [Lactuca sativa]
BMK_Unigene_002407	1	1	0	8	1	0	49	2	1	14	39	32	3.4042	0.0036613	0.0108475	up	PREDICTED: putative uncharacterized protein DDB_G0287975 [Nicotiana sylvestris]
BMK_Unigene_002412	32	0	6	9	64	6	0	1	0	0	0	5	-4.6336	0.000880594	0.00298121	down	hypothetical protein PRUPE_1G239800 [Prunus persica]
BMK_Unigene_002417	38	46	3	2	127	0	2	4	6	1	1	1	-4.1358	0.000312986	0.00115337	down	hypothetical protein VITISV_022066 [Vitis vinifera]
BMK_Unigene_002428	42	67	14	27	170	26	1291	215	775	187	850	1631	3.5023	5.10936e-09	3.64623e-08	up	PREDICTED: uncharacterized protein LOC100253483 [Vitis vinifera]
BMK_Unigene_002429	325	465	356	429	353	376	23	44	190	91	93	86	-2.3924	4.12331e-09	2.97799e-08	down	PREDICTED: transcription initiation factor IIA subunit 2 [Nicotiana tomentosiformis]
BMK_Unigene_002440	159	112	43	44	88	37	22	20	6	42	11	43	-1.8968	0.000245773	0.000924676	down	hypothetical protein COLO4_26044 [Corchorus olitorius]
BMK_Unigene_002444	28	94	29	62	36	39	287	207	193	268	252	187	2.1039	1.61218e-09	1.21913e-08	up	folylpolyglutamate synthase-like isoform X2 [Manihot esculenta]
BMK_Unigene_002463	260	120	109	168	59	74	1	3	2	3	0	5	-5.9613	2.29028e-23	5.63408e-22	down	PREDICTED: G-type lectin S-receptor-like serine/threonine-protein kinase At4g27290 [Nicotiana tomentosiformis]
BMK_Unigene_002495	181	148	33	9	70	46	1	0	0	9	0	0	-5.7103	1.28906e-08	8.78236e-08	down	PREDICTED: RING-H2 finger protein ATL74-like [Juglans regia]
BMK_Unigene_002496	3306	3769	2018	2836	2852	3663	326	313	767	603	460	530	-2.8484	3.58424e-31	1.5643e-29	down	PREDICTED: uncharacterized protein LOC108218531 isoform X2 [Daucus carota subsp. sativus]
BMK_Unigene_002516	0	0	0	2	6	29	0	1	0	1	0	0	-4.344	0.0242326	0.0575986	down	GDSL esterase/lipase 5-like [Herrania umbratica]
BMK_Unigene_002539	145	117	66	73	107	75	71	32	60	58	59	58	-0.9874	5.74754e-05	0.000240332	down	PREDICTED: uncharacterized protein LOC100261372 isoform X2 [Vitis vinifera]
BMK_Unigene_002549	38	53	83	218	16	56	5	6	5	26	10	18	-2.9471	6.35229e-06	3.08258e-05	down	Cysteine rich receptor like kinase [Trema orientalis]
BMK_Unigene_002552	336	299	181	169	493	275	25	11	5	41	6	11	-4.353	8.73001e-18	1.40897e-16	down	hypothetical protein BC332_18423 [Capsicum chinense]
BMK_Unigene_002554	79	72	43	56	50	184	212	173	352	1078	484	252	2.1885	1.80656e-05	8.19401e-05	up	PREDICTED: protein DETOXIFICATION 33 isoform X1 [Ricinus communis]
BMK_Unigene_002560	11	4	0	2	64	0	1	0	6	2	0	1	-3.5119	0.0228695	0.0548085	down	PREDICTED: uncharacterized protein At1g04910-like [Pyrus x bretschneideri]
BMK_Unigene_002565	191	228	149	174	135	120	267	151	682	441	330	315	0.9035	0.00534524	0.0152233	up	PREDICTED: uncharacterized protein LOC107824165 [Nicotiana tabacum]
BMK_Unigene_002568	9	18	0	0	6	0	584	495	1136	923	972	1000	7.1466	6.16042e-29	2.2736e-27	up	two-component response regulator ARR12-like [Quercus suber]
BMK_Unigene_002570	3	1	0	0	9	0	83	217	21	51	43	217	5.3314	2.35169e-09	1.74394e-08	up	Tyrosine-protein kinase [Parasponia andersonii]
BMK_Unigene_002572	103	21	335	608	39	215	4	4	3	86	2	62	-3.2971	0.000328334	0.0012047	down	hypothetical protein CUMW_166810 [Citrus unshiu]
BMK_Unigene_002579	28	34	15	2	43	9	0	1	2	10	3	0	-3.2553	0.000671764	0.00233073	down	uncharacterized protein LOC18793257 [Prunus persica]
BMK_Unigene_002591	9	24	7	2	22	3	7	0	1	7	2	0	-2.1827	0.0323908	0.0739616	down	BnaCnng41000D [Brassica napus]
BMK_Unigene_002598	9	1	21	63	4	8	30	80	432	1319	62	1725	4.8079	2.03681e-06	1.06115e-05	up	protein NRT1/ PTR FAMILY 7.3-like [Lactuca sativa]
BMK_Unigene_002599	43	20	97	66	19	28	468	1320	670	571	681	1052	3.9452	1.78235e-13	1.98001e-12	up	uncharacterized protein LOC110812964 [Carica papaya]
BMK_Unigene_002606	2981	3999	2016	1682	1628	3019	1070	533	1745	797	936	1813	-1.3682	7.84012e-06	3.75418e-05	down	Cellulose synthase [Corchorus olitorius]
BMK_Unigene_002616	1088	1320	967	698	971	765	1296	2142	1690	1625	1447	1297	0.5385	0.0219675	0.052918	up	PREDICTED: auxin response factor 2 [Vitis vinifera]
BMK_Unigene_002625	0	0	0	5	0	0	0	0	115	18	0	614	6.834	0.0248529	0.0588727	up	PREDICTED: U1 small nuclear ribonucleoprotein C-2-like [Gossypium raimondii]
BMK_Unigene_002629	20	0	3	0	8	0	43	254	33	3	1	46	3.6182	0.00280398	0.00853329	up	Topless-related protein 2 [Capsicum chinense]
BMK_Unigene_002633	1610	1363	1145	1757	1192	1658	753	807	1042	1285	808	648	-0.9075	0.000475452	0.00169805	down	hypothetical protein MIMGU_mgv1a017328mg [Erythranthe guttata]
BMK_Unigene_002640	142	136	101	107	151	116	171	271	255	224	135	281	0.6224	0.0152152	0.0384438	up	PREDICTED: nuclear transcription factor Y subunit B-10-like isoform X4 [Nicotiana tomentosiformis]
BMK_Unigene_002662	8	0	0	0	0	7	60	39	60	34	83	89	4.4636	4.45251e-08	2.85741e-07	up	PREDICTED: uncharacterized protein YKR070W [Solanum pennellii]
BMK_Unigene_002671	26	1	1	1	60	5	223	190	312	316	287	400	3.853	4.58474e-07	2.59668e-06	up	PREDICTED: zinc finger CCCH domain-containing protein 30 [Vitis vinifera]
BMK_Unigene_002685	336	460	210	199	331	297	1	7	8	8	27	14	-5.032	1.33268e-28	4.78339e-27	down	unnamed protein product [Coffea canephora]
BMK_Unigene_002689	3050	1634	1492	801	2104	1061	5139	1867	7575	2909	3793	6157	1.1996	0.000399713	0.00144517	up	PREDICTED: ankyrin repeat-containing protein At5g02620-like [Juglans regia]
BMK_Unigene_002706	427	133	161	145	203	113	97	145	73	64	104	136	-1.0834	0.00413393	0.012107	down	scarecrow-like protein 14 [Prunus avium]
BMK_Unigene_002730	2126	3265	1859	1941	2176	4020	986	443	315	463	1128	1100	-2.0016	6.29546e-08	3.96475e-07	down	serine hydroxymethyltransferase 4-like [Olea europaea var. sylvestris]
BMK_Unigene_002732	1023	709	845	1038	492	1221	538	465	716	472	715	651	-0.7913	0.00396567	0.0116504	down	PREDICTED: protein BTR1 isoform X2 [Vitis vinifera]
BMK_Unigene_002733	726	706	483	588	485	542	423	345	466	415	335	379	-0.7697	5.37827e-06	2.64008e-05	down	unnamed protein product [Coffea canephora]
BMK_Unigene_002747	44	17	36	14	20	45	242	190	132	95	99	102	2.1286	1.24423e-06	6.66273e-06	up	uncharacterized protein LOC110632104 [Hevea brasiliensis]
BMK_Unigene_002749	71	23	42	23	31	20	519	427	1022	1024	761	888	4.2621	6.00291e-34	3.17712e-32	up	hypothetical protein CDL12_15570 [Handroanthus impetiginosus]
BMK_Unigene_002755	113	498	29	28	139	130	1143	1552	77	86	211	202	1.793	0.0171309	0.0426665	up	protein STRUBBELIG-RECEPTOR FAMILY 8-like [Olea europaea var. sylvestris]
BMK_Unigene_002781	13	28	8	3	18	12	0	2	1	1	2	8	-2.7655	0.000862544	0.00292535	down	PREDICTED: pentatricopeptide repeat-containing protein At1g28690, mitochondrial [Daucus carota subsp. sativus]
BMK_Unigene_002782	90	118	42	44	66	44	2	42	67	16	2	44	-1.4203	0.0483203	0.104157	down	protein FRIGIDA-like [Manihot esculenta]
BMK_Unigene_002792	52	45	70	35	96	81	17	22	7	9	66	27	-1.5921	0.00358363	0.0106371	down	transcription repressor KAN1-like isoform X2 [Olea europaea var. sylvestris]
BMK_Unigene_002804	11	67	6	11	44	11	567	589	207	319	362	322	3.8243	4.90921e-13	5.27208e-12	up	Subtilase family protein, putative isoform 1 [Theobroma cacao]
BMK_Unigene_002808	20	377	112	74	703	161	11	12	53	56	14	57	-3.193	1.48928e-05	6.83895e-05	down	Cytochrome P450 CYP2 subfamily [Handroanthus impetiginosus]
BMK_Unigene_002829	1804	2341	792	693	1715	1372	30	49	65	28	26	34	-5.4211	1.43741e-59	3.27062e-57	down	PREDICTED: nuclear pore complex protein NUP88 [Vitis vinifera]
BMK_Unigene_002837	41	38	15	75	6	6	879	847	489	417	486	869	4.3309	2.45169e-13	2.69305e-12	up	hypothetical protein BC332_19474 [Capsicum chinense]
BMK_Unigene_002859	0	0	0	0	0	0	2	0	1	12	3	6	7.835	0.0208376	0.0506123	up	Pyridoxal 5&apos;-phosphate synthase subunit PDX1 [Hortaea werneckii EXF-2000]
BMK_Unigene_002862	59	37	72	42	58	64	18	8	17	10	12	8	-2.4185	8.35115e-10	6.48844e-09	down	Squalene/phytoene synthase [Trema orientalis]
BMK_Unigene_002866	650	656	170	231	683	195	28	43	1	17	7	56	-4.2388	9.5675e-11	8.18456e-10	down	zinc finger protein CO3-like [Manihot esculenta]
BMK_Unigene_002884	0	0	0	2	0	0	10	4	0	0	0	41	4.4594	0.0349484	0.0789017	up	hexokinase [Actinidia deliciosa]
BMK_Unigene_002889	473	340	299	362	269	309	78	81	387	170	133	195	-1.2241	0.00091262	0.00308002	down	PREDICTED: E3 ubiquitin-protein ligase PRT1 [Ziziphus jujuba]
BMK_Unigene_002932	681	856	531	300	832	529	657	11	547	44	19	6	-1.7984	0.0454619	0.0988914	down	unnamed protein product [Coffea canephora]
BMK_Unigene_002953	190	113	82	110	75	93	2175	2334	2494	2784	2156	2316	4.2638	3.07634e-77	1.4792e-74	up	PREDICTED: homeobox-DDT domain protein RLT2 isoform X1 [Vitis vinifera]
BMK_Unigene_002960	58	16	9	13	83	31	138	97	352	133	209	242	2.172	9.38677e-06	4.44426e-05	up	uncharacterized protein LOC112038886 isoform X2 [Quercus suber]
BMK_Unigene_002965	331	1060	244	548	241	754	254	208	308	254	519	275	-0.9845	0.0118178	0.0308128	down	hypothetical protein TSUD_401600 [Trifolium subterraneum]
BMK_Unigene_002968	82	30	39	44	57	55	7	24	18	9	46	29	-1.4106	0.00331751	0.00992818	down	succinate dehydrogenase assembly factor 1, mitochondrial [Quercus suber]
BMK_Unigene_002970	520	729	241	463	228	414	1013	974	1040	798	953	738	0.938	0.000832075	0.00283238	up	hypothetical protein BC332_08325 [Capsicum chinense]
BMK_Unigene_002971	30	15	27	78	21	16	170	113	161	348	172	261	2.481	2.44966e-06	1.26179e-05	up	Concanavalin A-like lectin/glucanase, subgroup [Cynara cardunculus var. scolymus]
BMK_Unigene_002985	41	52	22	5	96	14	15	14	9	18	20	13	-1.6068	0.0108616	0.0286111	down	DNA-directed RNA polymerase V subunit 5A isoform X2 [Cucurbita moschata]
BMK_Unigene_002995	319	214	148	177	244	130	152	117	48	53	68	77	-1.4111	0.000159633	0.000620182	down	PREDICTED: uncharacterized protein LOC100853672 isoform X8 [Vitis vinifera]
BMK_Unigene_002997	100	62	82	189	62	120	504	438	533	408	346	466	1.92	8.55356e-07	4.69125e-06	up	zinc finger AN1 domain-containing stress-associated protein 12 [Jatropha curcas]
BMK_Unigene_003016	199	261	140	101	236	205	1266	700	640	465	1714	869	2.107	4.7348e-10	3.77954e-09	up	PREDICTED: 23 kDa jasmonate-induced protein-like [Malus domestica]
BMK_Unigene_003029	91	15	80	133	56	79	1071	827	1959	2040	1477	1862	4.0968	4.66411e-18	7.6957e-17	up	WRKY transcription factor [Camellia sinensis]
BMK_Unigene_003034	3286	3344	1297	897	2933	2045	295	267	649	277	381	273	-2.904	4.47471e-19	7.97158e-18	down	PREDICTED: factor of DNA methylation 1 isoform X2 [Vitis vinifera]
BMK_Unigene_003056	74	92	41	57	61	50	104	101	188	183	115	214	1.0591	4.83215e-05	0.000204606	up	PREDICTED: very-long-chain 3-oxoacyl-CoA reductase 1 [Nicotiana tomentosiformis]
BMK_Unigene_003101	8	4	0	0	13	3	14	8	11	46	47	20	2.1115	0.00648593	0.0180994	up	hypothetical protein AQUCO_35200001v1 [Aquilegia coerulea]
BMK_Unigene_003111	1561	3087	398	1668	377	1705	347	812	113	244	349	323	-2.0644	0.000207233	0.000789405	down	PREDICTED: probable choline kinase 1 isoform X3 [Pyrus x bretschneideri]
BMK_Unigene_003144	1807	1945	1290	931	1533	1716	1887	1500	3200	2714	2716	2244	0.413	0.031796	0.072793	up	uncharacterized protein LOC105161979 isoform X1 [Sesamum indicum]
BMK_Unigene_003149	37	36	3	13	50	12	131	107	104	58	69	61	1.6138	0.00080904	0.00276282	up	28 kDa ribonucleoprotein, chloroplastic [Manihot esculenta]
BMK_Unigene_003164	116	27	65	57	1	61	8	14	3	26	19	47	-1.6345	0.0249395	0.059042	down	Amino acid transporter, transmembrane domain containing protein [Parasponia andersonii]
BMK_Unigene_003200	228	221	145	143	147	151	193	134	107	102	118	124	-0.5764	0.0155594	0.0392086	down	uncharacterized protein LOC110613881 [Manihot esculenta]
BMK_Unigene_003204	8	141	5	19	37	17	3	0	6	8	0	4	-3.6291	0.000106194	0.000425077	down	subtilisin-like protease SBT1.7 isoform X2 [Sesamum indicum]
BMK_Unigene_003205	19	68	1	43	11	50	292	223	147	121	296	405	2.7903	5.67024e-06	2.77299e-05	up	E3 ubiquitin-protein ligase ATL23-like [Manihot esculenta]
BMK_Unigene_003217	662	642	589	742	541	586	203	125	260	151	228	137	-1.9875	4.32179e-15	5.56104e-14	down	MMR_HSR1 domain-containing protein/TGS domain-containing protein [Cephalotus follicularis]
BMK_Unigene_003226	1271	812	697	292	563	459	207	241	351	284	264	307	-1.4794	2.23467e-07	1.31505e-06	down	PREDICTED: ectonucleotide pyrophosphatase/phosphodiesterase family member 3 [Nelumbo nucifera]
BMK_Unigene_003237	1348	1033	922	1023	1114	707	90	113	100	68	120	97	-3.5766	6.74582e-49	8.81593e-47	down	uncharacterized protein LOC18046468 isoform X3 [Citrus clementina]
BMK_Unigene_003246	2329	1369	1240	775	1493	1455	777	846	1071	680	833	958	-0.9404	3.37454e-05	0.000146477	down	unnamed protein product [Coffea canephora]
BMK_Unigene_003247	43	61	7	0	463	7	0	4	28	34	6	8	-3.2987	0.00949349	0.0254117	down	PREDICTED: transcription factor TGA4-like isoform X4 [Pyrus x bretschneideri]
BMK_Unigene_003254	133	162	141	182	107	149	3947	3571	4490	3318	4546	4195	4.579	1.7871e-83	1.24774e-80	up	PREDICTED: uncharacterized protein LOC100247348 isoform X2 [Vitis vinifera]
BMK_Unigene_003275	124	149	65	63	161	78	163	240	187	177	176	248	0.6966	0.00770972	0.0210968	up	PREDICTED: protein EMBRYONIC FLOWER 1 [Vitis vinifera]
BMK_Unigene_003306	0	5	5	2	0	2	193	257	70	114	333	98	6.1264	1.80378e-18	3.07784e-17	up	hypothetical protein [Cyclamen persicum x Cyclamen purpurascens]
BMK_Unigene_003308	22	12	12	24	12	20	28	4	131	116	42	82	1.7111	0.00658744	0.0183499	up	hypothetical protein CICLE_v10023337mg, partial [Citrus clementina]
BMK_Unigene_003349	2987	1937	6975	3719	673	3549	12775	21818	10900	9721	7019	6381	1.6492	0.00512041	0.0146503	up	Rubber elongation factor [Trema orientalis]
BMK_Unigene_003355	83	175	167	97	168	214	41	66	124	76	70	64	-1.2843	0.000381576	0.0013852	down	hypothetical protein VITISV_035309 [Vitis vinifera]
BMK_Unigene_003356	1121	1353	1010	933	1002	1345	31	38	36	49	26	42	-5.1222	2.04091e-102	3.35551e-99	down	mitochondrial outer membrane protein porin of 36 kDa [Hevea brasiliensis]
BMK_Unigene_003369	17	26	9	7	22	89	0	11	2	4	0	12	-2.7262	0.00380774	0.0112343	down	CASP-like protein 1C1 [Durio zibethinus]
BMK_Unigene_003371	1	1	0	3	0	3	10	21	31	16	37	15	3.8016	1.51875e-06	8.04569e-06	up	ABC transporter B family member 19-like protein, partial [Trifolium pratense]
BMK_Unigene_003380	35	203	32	124	69	35	32	49	31	54	38	61	-1.075	0.0316716	0.0725557	down	PREDICTED: histone acetyltransferase of the MYST family 1 [Solanum lycopersicum]
BMK_Unigene_003403	78	124	11	11	305	13	21	16	23	48	31	42	-1.8924	0.0188494	0.0463509	down	PHD finger protein alfin-like 5-like [Trifolium pratense]
BMK_Unigene_003412	152	76	34	220	112	145	1	12	18	27	30	35	-2.8277	1.85631e-06	9.71878e-06	down	putative amino acid permease 7 [Quercus suber]
BMK_Unigene_003413	334	102	2397	1956	88	979	3	5	0	1	8	13	-7.8402	7.86002e-19	1.37619e-17	down	UDP-glycosyltransferase 73C6-like [Quercus suber]
BMK_Unigene_003423	54	25	43	37	53	54	337	287	603	812	577	443	3.2799	1.90833e-22	4.37534e-21	up	PREDICTED: 60S ribosomal protein L24 [Malus domestica]
BMK_Unigene_003429	3027	2768	2038	1622	2573	2456	1806	1976	2574	1885	2100	2387	-0.3919	0.0129521	0.0334164	down	WD repeat containing protein [Parasponia andersonii]
BMK_Unigene_003434	164	147	134	74	194	123	2	2	4	5	0	3	-5.944	5.21312e-33	2.56222e-31	down	PREDICTED: uncharacterized protein LOC109179592 [Ipomoea nil]
BMK_Unigene_003459	40	26	15	66	16	19	1513	1749	2884	2157	2427	2863	6.0183	1.95272e-48	2.50066e-46	up	Exocyst component protein [Handroanthus impetiginosus]
BMK_Unigene_003461	542	588	186	276	568	264	800	609	940	628	836	808	0.7224	0.00255602	0.00785404	up	unnamed protein product [Coffea canephora]
BMK_Unigene_003463	269	629	466	2250	244	395	308	407	74	211	144	141	-1.867	0.00182504	0.00578044	down	probable ribose-5-phosphate isomerase 2 [Momordica charantia]
BMK_Unigene_003485	26	47	5	5	34	24	1	0	2	0	0	6	-4.2854	9.1352e-06	4.33159e-05	down	ferritin-4, chloroplastic-like [Helianthus annuus]
BMK_Unigene_003492	1033	1063	1079	1442	2886	1090	412	404	624	609	586	769	-1.6259	3.5976e-06	1.8076e-05	down	unnamed protein product [Coffea canephora]
BMK_Unigene_003493	22	4	12	7	4	8	150	120	248	456	179	245	4.4425	2.71325e-20	5.31881e-19	up	Glutathione gamma-glutamylcysteinyltransferase 2 [Capsicum annuum]
BMK_Unigene_003495	129	130	120	78	128	89	226	114	626	292	305	391	1.2724	0.000143072	0.000559941	up	trihelix transcription factor ASIL2-like [Cajanus cajan]
BMK_Unigene_003496	42	74	17	7	33	13	1032	1280	513	526	774	890	4.6476	7.3562e-25	2.02556e-23	up	hypothetical protein MANES_06G024300 [Manihot esculenta]
BMK_Unigene_003537	2	3	0	4	15	1	95	108	170	178	208	306	5.0324	2.36419e-16	3.40101e-15	up	phosphoglycerate mutase-like protein 4 isoform X1 [Manihot esculenta]
BMK_Unigene_003552	5	0	0	0	0	3	23	1	8	8	4	9	2.6041	0.0269218	0.0631049	up	hypothetical protein Poptr_cp015 [Populus trichocarpa]
BMK_Unigene_003559	1509	1758	1110	2072	1433	2003	2785	2025	3959	5274	3918	3263	0.8791	0.00263988	0.00808785	up	cation/H(+) antiporter 15-like [Dorcoceras hygrometricum]
BMK_Unigene_003587	53	28	163	94	29	76	2	0	10	11	6	0	-4.2049	7.77737e-08	4.84297e-07	down	PREDICTED: uncharacterized protein LOC108999680 isoform X1 [Juglans regia]
BMK_Unigene_003590	197	116	65	33	89	37	305	445	99	275	466	220	1.6552	0.000260371	0.000973631	up	PREDICTED: uncharacterized protein LOC109224900 [Nicotiana attenuata]
BMK_Unigene_003599	1002	1315	645	380	900	732	244	180	249	191	208	213	-2.1426	2.11193e-21	4.50003e-20	down	uncharacterized protein LOC111904181 [Lactuca sativa]
BMK_Unigene_003622	14	4	8	6	3	24	5	30	76	54	25	41	1.737	0.00894965	0.024099	up	hypothetical protein NitaMp145 [Nicotiana tabacum]
BMK_Unigene_003625	75	87	23	39	150	6	10	25	11	20	1	17	-2.3797	0.00136784	0.00445469	down	unnamed protein product, partial [Vitis vinifera]
BMK_Unigene_003631	244	190	115	158	233	137	130	124	88	147	101	147	-0.7414	0.00482193	0.0138842	down	phosphatidylserine decarboxylase proenzyme 1, mitochondrial [Nicotiana attenuata]
BMK_Unigene_003635	129	171	99	271	142	148	643	688	218	1280	943	973	2.1107	1.86838e-06	9.77598e-06	up	unnamed protein product [Coffea canephora]
BMK_Unigene_003643	0	0	0	0	0	0	61	81	62	128	79	82	12.2378	1.83596e-20	3.64816e-19	up	PREDICTED: uncharacterized protein LOC104435975 [Eucalyptus grandis]
BMK_Unigene_003650	299	494	98	87	530	384	13	28	44	7	16	22	-4.1026	7.99402e-15	1.00404e-13	down	unnamed protein product, partial [Vitis vinifera]
BMK_Unigene_003659	443	275	216	492	347	283	169	212	277	285	227	339	-0.6657	0.0207901	0.0505187	down	CSC1-like protein At4g35870 [Sesamum indicum]
BMK_Unigene_003660	271	246	166	200	166	220	18	15	94	4	33	81	-2.6481	1.42886e-06	7.59081e-06	down	PREDICTED: cyclin-B1-2-like [Juglans regia]
BMK_Unigene_003672	2693	1257	1299	2067	947	1451	1187	1110	863	1053	1182	1075	-0.7474	0.00752435	0.0206539	down	unnamed protein product, partial [Vitis vinifera]
BMK_Unigene_003685	110	92	50	48	85	40	0	0	2	1	0	1	-7.0671	2.82062e-17	4.36434e-16	down	uncharacterized protein LOC110686713 [Chenopodium quinoa]
BMK_Unigene_003688	821	616	436	510	786	681	104	122	115	313	224	192	-2.0578	7.30824e-11	6.32834e-10	down	hypothetical protein VITISV_026363 [Vitis vinifera]
BMK_Unigene_003708	903	648	606	507	486	682	164	63	32	66	148	61	-3.0053	8.27957e-15	1.03837e-13	down	probable glucan endo-1,3-beta-glucosidase A6 [Olea europaea var. sylvestris]
BMK_Unigene_003728	585	356	379	338	816	374	28	114	23	14	203	77	-2.8339	1.51945e-06	8.04858e-06	down	Ulp1 protease family, C-terminal catalytic domain containing protein [Parasponia andersonii]
BMK_Unigene_003752	190	165	101	52	104	84	23	58	8	32	38	45	-1.8833	3.10816e-05	0.000135631	down	periodic tryptophan protein 1 homolog [Hevea brasiliensis]
BMK_Unigene_003770	120	281	28	18	96	17	12	32	1	11	15	2	-2.9451	0.000318464	0.00117161	down	hypothetical protein VITISV_036298 [Vitis vinifera]
BMK_Unigene_003784	40	49	18	17	60	7	22	138	54	24	89	164	1.1679	0.0392574	0.087279	up	PREDICTED: uncharacterized protein LOC104211962 [Nicotiana sylvestris]
BMK_Unigene_003786	4	10	6	6	1	2	350	176	712	462	505	453	6.3299	8.96092e-42	7.94296e-40	up	pentatricopeptide repeat-containing protein At5g61990, mitochondrial [Quercus suber]
BMK_Unigene_003798	17	8	5	25	3	7	4	2	6	5	7	1	-1.5514	0.0268374	0.0629417	down	PREDICTED: isoleucine--tRNA ligase, cytoplasmic [Musa acuminata subsp. malaccensis]
BMK_Unigene_003799	21	38	36	27	14	39	108	52	168	141	127	91	1.7529	4.98477e-06	2.45876e-05	up	PREDICTED: LOW QUALITY PROTEIN: pentatricopeptide repeat-containing protein At2g22410, mitochondrial [Vitis vinifera]
BMK_Unigene_003813	2	5	2	4	0	0	258	222	137	67	210	112	6.1584	1.28941e-21	2.77997e-20	up	CBL-interacting protein kinase 13 [Vitis vinifera]
BMK_Unigene_003817	844	1020	400	452	757	571	347	196	421	558	275	376	-1.1018	4.70429e-05	0.000199507	down	unnamed protein product [Coffea canephora]
BMK_Unigene_003833	114	181	76	108	154	117	81	40	109	80	72	44	-1.0456	0.000672268	0.00233216	down	PREDICTED: putative pentatricopeptide repeat-containing protein At5g37570 [Vitis vinifera]
BMK_Unigene_003834	0	0	0	0	0	2	23	59	1	0	54	12	6.0537	6.98868e-05	0.000288514	up	CDPK adapter protein 1 [Mesembryanthemum crystallinum]
BMK_Unigene_003867	1	5	2	5	10	5	1213	625	1549	1155	898	1615	7.6517	3.78199e-71	1.39682e-68	up	geraniol 10-hydroxylase 1 [Primula forbesii]
BMK_Unigene_003875	104	115	83	67	48	81	248	199	335	277	216	214	1.4007	5.68821e-09	4.03671e-08	up	hypothetical protein CICLE_v10029401mg [Citrus clementina]
BMK_Unigene_003881	167	186	124	93	93	205	457	406	328	236	188	568	1.1548	0.000597045	0.00209042	up	PREDICTED: uncharacterized protein At5g49945-like [Gossypium hirsutum]
BMK_Unigene_003882	39	16	16	38	30	35	255	22	236	67	153	60	1.9335	0.000494435	0.00175919	up	uncharacterized protein LOC105641537 isoform X2 [Jatropha curcas]
BMK_Unigene_003884	109	84	39	25	42	53	48	38	31	47	15	26	-0.9048	0.0282904	0.0658616	down	PREDICTED: inner membrane protein PPF-1, chloroplastic isoform X2 [Solanum lycopersicum]
BMK_Unigene_003887	171	111	132	86	126	72	219	166	306	163	191	173	0.5923	0.0264472	0.0621581	up	serine/threonine-protein kinase Aurora-2 [Citrus clementina]
BMK_Unigene_003895	13	7	7	3	10	9	64	121	18	132	28	123	3.1527	4.46742e-08	2.8659e-07	up	PREDICTED: methionine S-methyltransferase isoform X1 [Vitis vinifera]
BMK_Unigene_003897	732	97	89	142	56	165	25	24	17	79	45	64	-2.4362	3.38755e-05	0.00014703	down	PREDICTED: uncharacterized protein LOC107013704 [Solanum pennellii]
BMK_Unigene_003900	3432	4401	2844	1794	3193	3483	2	12	9	1	16	14	-8.6629	1.14923e-86	9.29744e-84	down	pyruvate kinase, cytosolic isozyme [Herrania umbratica]
BMK_Unigene_003903	78	41	332	52	6	138	1322	1234	1813	1770	1611	2259	3.7292	4.98786e-08	3.18095e-07	up	hypothetical protein B456_007G188400 [Gossypium raimondii]
BMK_Unigene_003908	95	119	271	160	10	881	41	0	6	116	79	129	-2.3028	0.0138087	0.0353189	down	1-aminocyclopropane-1-carboxylate oxidase homolog 3-like [Manihot esculenta]
BMK_Unigene_003909	583	683	347	257	576	362	1082	1683	2125	1454	1564	1786	1.5877	4.38481e-12	4.27232e-11	up	sister-chromatid cohesion protein 3 isoform X1 [Citrus clementina]
BMK_Unigene_003919	0	14	0	27	15	8	496	348	817	919	762	459	5.6123	5.12585e-15	6.54936e-14	up	PREDICTED: protein RTF2 homolog [Daucus carota subsp. sativus]
BMK_Unigene_003921	2	21	4	10	2	3	16	39	11	16	27	20	1.5324	0.0260645	0.0613921	up	PREDICTED: uncharacterized protein LOC100267728 [Vitis vinifera]
BMK_Unigene_003923	469	434	305	832	419	391	220	166	401	224	294	325	-1.0483	0.00118851	0.00391417	down	protein root UVB sensitive 6 isoform X2 [Olea europaea var. sylvestris]
BMK_Unigene_003925	95	60	33	10	49	31	20	21	14	5	21	30	-1.4773	0.00448164	0.0130117	down	hypothetical protein VITISV_041073 [Vitis vinifera]
BMK_Unigene_003926	27	90	21	22	191	13	16	0	28	16	0	24	-2.495	0.0110943	0.0291352	down	Armadillo repeat only 1 [Dorcoceras hygrometricum]
BMK_Unigene_003927	333	236	274	326	184	242	843	663	1459	1396	1104	1122	1.8306	6.41829e-11	5.59671e-10	up	PREDICTED: SCY1-like protein 2 [Malus domestica]
BMK_Unigene_003928	2167	1526	1200	1081	1283	1150	602	531	493	491	738	601	-1.4587	9.61946e-15	1.19845e-13	down	exportin-4 [Manihot esculenta]
BMK_Unigene_003933	618	885	76	29	1193	160	0	11	0	0	0	3	-7.7797	1.0942e-12	1.13814e-11	down	zinc finger protein [Macleaya cordata]
BMK_Unigene_003934	40	51	31	16	25	39	19	10	15	4	7	28	-1.4833	0.00190455	0.00600948	down	hypothetical protein VITISV_011607, partial [Vitis vinifera]
BMK_Unigene_003942	847	1020	689	558	735	854	48	155	79	60	88	175	-3.1351	8.48902e-19	1.48326e-17	down	Ribosomal biogenesis, methyltransferase, EMG1/NEP1 [Cynara cardunculus var. scolymus]
BMK_Unigene_003943	44	8	0	5	0	9	4	1	3	0	0	0	-3.1131	0.0341553	0.0774078	down	Retrovirus-related Pol polyprotein from transposon TNT 1-94 [Apostasia shenzhenica]
BMK_Unigene_003945	24	14	12	8	21	32	1231	838	1392	873	1254	1132	5.6912	5.29279e-78	2.64473e-75	up	PREDICTED: uncharacterized protein LOC8273669 [Ricinus communis]
BMK_Unigene_003946	230	641	180	117	209	291	57	46	9	96	21	28	-2.8123	1.19474e-07	7.27955e-07	down	hypothetical protein CDL15_Pgr011767 [Punica granatum]
BMK_Unigene_003948	0	67	5	12	3	6	135	84	174	146	87	130	2.9077	7.86765e-05	0.000321596	up	hypothetical protein VITISV_039388 [Vitis vinifera]
BMK_Unigene_003952	48	240	36	118	155	67	5062	8702	2538	2646	3569	2662	5.1082	4.64428e-24	1.20096e-22	up	PREDICTED: ABC transporter C family member 8-like [Juglans regia]
BMK_Unigene_003959	25	52	11	3	12	4	11	1	3	9	3	0	-2.0885	0.0195599	0.0478786	down	PREDICTED: NAC domain-containing protein 100 [Vitis vinifera]
BMK_Unigene_003960	285	191	219	250	118	211	2594	2032	3590	2269	1933	2530	3.3541	2.42626e-33	1.22195e-31	up	PREDICTED: transcriptional regulator DEF1 isoform X1 [Nicotiana tomentosiformis]
BMK_Unigene_003964	200	181	82	123	145	139	348	548	297	346	277	278	1.1201	9.92008e-05	0.000398964	up	rRNA-processing protein EFG1 [Olea europaea var. sylvestris]
BMK_Unigene_003968	89	125	127	130	48	121	754	532	497	582	569	518	2.2525	1.11277e-11	1.04565e-10	up	protein disulfide isomerase-like 2-3 [Sesamum indicum]
BMK_Unigene_003970	3400	2816	2495	1692	2160	2162	8786	10542	3314	3659	4728	4259	1.1375	0.00231915	0.00719079	up	Serine/threonine-protein kinase PBS1 [Populus trichocarpa]
BMK_Unigene_003972	14	13	2	4	15	0	61	45	89	100	47	27	2.737	3.75704e-06	1.8838e-05	up	PREDICTED: uncharacterized protein LOC109005459 [Juglans regia]
BMK_Unigene_003982	1041	544	829	704	370	658	443	535	240	377	277	359	-1.0345	0.0020738	0.00649207	down	protein yippee-like At4g27745 [Cajanus cajan]
BMK_Unigene_003987	446	512	254	307	661	448	96	55	112	79	84	111	-2.5393	2.34129e-22	5.3249e-21	down	PREDICTED: nucleolar GTP-binding protein 1 isoform X1 [Vitis vinifera]
BMK_Unigene_003990	9	2	24	4	26	35	3	0	2	3	4	4	-2.9618	0.000504269	0.00179068	down	aluminum-activated malate transporter 14-like [Helianthus annuus]
BMK_Unigene_004003	420	788	309	226	559	458	268	305	125	246	231	483	-0.9201	0.0122716	0.0318576	down	PREDICTED: K(+) efflux antiporter 6-like isoform X2 [Malus domestica]
BMK_Unigene_004008	1572	1967	1095	649	1610	927	872	579	592	670	685	559	-1.1675	3.7257e-06	1.86883e-05	down	PREDICTED: adenylyltransferase and sulfurtransferase MOCS3 [Vitis vinifera]
BMK_Unigene_004017	0	0	2	12	0	3	139	74	104	408	179	204	5.7659	4.39685e-11	3.88723e-10	up	Uncharacterized domain UPF0066, partial [Cynara cardunculus var. scolymus]
BMK_Unigene_004040	382	517	239	483	226	289	31	67	13	12	34	20	-3.6876	6.08535e-15	7.73268e-14	down	myosin-binding protein 7 [Jatropha curcas]
BMK_Unigene_004041	2	22	10	15	0	0	189	103	542	387	334	282	5.0381	6.66484e-11	5.80474e-10	up	uncharacterized protein LOC18766325 isoform X3 [Prunus persica]
BMK_Unigene_004046	317	401	160	27	507	90	65	58	115	48	42	76	-2.1383	0.000136067	0.000534577	down	zf-C3HC4_2 domain-containing protein [Cephalotus follicularis]
BMK_Unigene_004050	127	69	96	106	57	63	3	1	11	12	2	12	-3.9052	1.27567e-13	1.43655e-12	down	cytosolic endo-beta-n-acetylglucosaminidase 2 [Quercus suber]
BMK_Unigene_004063	12	25	10	13	10	2	86	68	140	98	121	164	3.039	1.16159e-13	1.3133e-12	up	uncharacterized protein LOC111997654 isoform X1 [Quercus suber]
BMK_Unigene_004072	166	223	48	88	238	119	417	561	531	1038	357	574	1.7753	1.19002e-06	6.39126e-06	up	unnamed protein product, partial [Vitis vinifera]
BMK_Unigene_004073	44	32	39	56	73	94	414	564	500	768	350	762	3.0664	2.99263e-16	4.27012e-15	up	PREDICTED: protein disulfide-isomerase [Nelumbo nucifera]
BMK_Unigene_004079	62	108	26	69	90	39	197	186	134	419	295	236	1.7015	6.06941e-06	2.95459e-05	up	PREDICTED: sister chromatid cohesion protein PDS5 homolog A isoform X2 [Vitis vinifera]
BMK_Unigene_004090	14	43	19	0	19	15	41	73	25	53	33	61	1.2419	0.0327059	0.0745473	up	PREDICTED: arogenate dehydrogenase 1, chloroplastic isoform X1 [Vitis vinifera]
BMK_Unigene_004111	1309	790	1192	1143	532	929	44	66	91	62	36	91	-4.1187	1.24965e-32	6.00869e-31	down	unnamed protein product, partial [Vitis vinifera]
BMK_Unigene_004115	442	486	350	680	336	464	45	52	79	106	93	79	-2.8153	2.84554e-19	5.14844e-18	down	hypothetical protein VITISV_027198 [Vitis vinifera]
BMK_Unigene_004139	212	318	204	344	124	692	1258	1526	544	1007	527	705	1.4078	0.00437624	0.0127369	up	PREDICTED: L-ascorbate oxidase homolog [Daucus carota subsp. sativus]
BMK_Unigene_004148	3	7	4	0	3	1	63	168	208	56	67	177	5.1907	2.57148e-17	3.99583e-16	up	PREDICTED: piezo-type mechanosensitive ion channel homolog isoform X1 [Vitis vinifera]
BMK_Unigene_004153	473	449	278	262	248	313	2	8	39	10	3	18	-4.9185	8.0952e-21	1.65701e-19	down	vesicle transport v-SNARE 12 [Prunus persica]
BMK_Unigene_004154	2900	2640	1881	2321	1776	2030	1299	1118	1761	1033	1285	1116	-1.0257	1.02026e-07	6.27118e-07	down	Glycosyl transferase [Macleaya cordata]
BMK_Unigene_004185	1019	873	698	827	445	1048	1260	848	2232	2543	1837	1795	0.8911	0.00406517	0.0119196	up	Ribosomal protein [Trema orientalis]
BMK_Unigene_004189	2555	3059	1919	2748	627	2490	24	0	145	151	40	87	-5.1419	7.01885e-13	7.44509e-12	down	--
BMK_Unigene_004192	445	294	335	274	259	354	82	52	18	96	118	64	-2.3617	7.49923e-10	5.85241e-09	down	MAP7 domain-containing protein 2 [Manihot esculenta]
BMK_Unigene_004196	6	13	2	74	0	0	0	0	0	0	0	0	-10.0544	0.000275708	0.00102639	down	Glucanosyltransferase-domain-containing protein [Clohesyomyces aquaticus]
BMK_Unigene_004198	2	1	0	0	13	0	5	344	9	21	4	257	5.0186	3.87654e-05	0.000166677	up	PREDICTED: uncharacterized protein LOC100264883 isoform X3 [Vitis vinifera]
BMK_Unigene_004206	147	329	90	43	431	91	69	94	32	33	78	66	-1.8075	0.00131627	0.00429827	down	PREDICTED: RNA polymerase sigma factor sigE, chloroplastic/mitochondrial-like, partial [Juglans regia]
BMK_Unigene_004207	32	14	8	26	127	6	0	3	0	0	7	27	-2.9185	0.0136933	0.0350679	down	uncharacterized protein LOC110906650 [Helianthus annuus]
BMK_Unigene_004208	35	17	4	40	29	32	258	274	355	556	349	364	3.5581	1.07707e-16	1.59396e-15	up	hypothetical protein POPTR_003G220400v3 [Populus trichocarpa]
BMK_Unigene_004209	227	342	184	167	261	170	378	219	606	448	352	379	0.5905	0.0110744	0.0290904	up	PREDICTED: uncharacterized protein At1g04910 [Nicotiana tomentosiformis]
BMK_Unigene_004211	3429	3691	3502	3438	2410	3284	9723	9082	7213	20391	12967	17041	1.7575	1.39472e-08	9.46679e-08	up	PREDICTED: S-adenosylmethionine synthase 1 [Ricinus communis]
BMK_Unigene_004214	2588	1553	1911	1760	1043	1797	1305	717	614	576	574	956	-1.3388	1.26026e-05	5.85104e-05	down	DSBA-like thioredoxin domain [Macleaya cordata]
BMK_Unigene_004219	5	5	1	0	2	3	403	283	729	297	526	486	7.2346	9.46876e-50	1.30787e-47	up	PREDICTED: uncharacterized protein LOC109174175 [Ipomoea nil]
BMK_Unigene_004220	303	131	65	71	218	44	999	926	1777	1472	1217	1194	2.9837	1.16569e-14	1.44347e-13	up	PREDICTED: serine/threonine-protein phosphatase 6 regulatory subunit 3 isoform X4 [Vitis vinifera]
BMK_Unigene_004238	58	67	37	93	71	70	28	73	223	270	166	247	1.0837	0.0268079	0.0628812	up	Erv1/Alr [Corchorus olitorius]
BMK_Unigene_004240	38	24	5	23	6	3	75	167	417	127	118	143	3.2519	1.95393e-08	1.30607e-07	up	PREDICTED: sodium/hydrogen exchanger 2-like [Solanum pennellii]
BMK_Unigene_004255	213	179	90	40	265	112	35	26	34	52	64	57	-1.9772	2.21568e-06	1.14858e-05	down	DNA-directed RNA polymerase III subunit RPC8 isoform X1 [Sesamum indicum]
BMK_Unigene_004256	115	148	562	156	95	219	78	26	31	55	69	54	-2.2692	5.85819e-06	2.85832e-05	down	putative receptor-like protein kinase At4g00960 [Herrania umbratica]
BMK_Unigene_004257	1543	380	674	2264	337	835	113	56	66	756	154	41	-2.5168	0.000270701	0.00100959	down	PREDICTED: amino-acid permease BAT1 homolog isoform X3 [Nelumbo nucifera]
BMK_Unigene_004259	1830	2967	256	710	1724	876	781	1029	395	327	554	1163	-1.1167	0.0335003	0.0761198	down	probable 1-deoxy-D-xylulose-5-phosphate synthase, chloroplastic [Hevea brasiliensis]
BMK_Unigene_004260	8	3	2	3	8	0	7	0	48	406	22	37	4.2083	0.000123328	0.000487495	up	NAC domain-containing protein [Boehmeria nivea]
BMK_Unigene_004266	0	18	3	13	0	5	138	1	113	114	15	47	3.2665	0.00152547	0.00491135	up	PREDICTED: aspartyl protease AED3-like [Juglans regia]
BMK_Unigene_004277	132	167	8	80	72	15	0	0	3	8	5	11	-4.3401	1.98955e-07	1.17893e-06	down	UDP-glucuronosyl/UDP-glucosyltransferase [Trema orientalis]
BMK_Unigene_004278	902	909	525	562	312	468	595	456	266	253	421	471	-0.7119	0.022572	0.0541848	down	PREDICTED: dymeclin isoform X1 [Nicotiana tomentosiformis]
BMK_Unigene_004295	271	47	46	53	54	77	0	7	10	14	3	10	-3.7864	3.57312e-09	2.59784e-08	down	PREDICTED: MDIS1-interacting receptor like kinase 2-like [Nicotiana attenuata]
BMK_Unigene_004296	1169	1126	675	448	1138	674	201	287	366	180	163	465	-1.8699	8.87832e-09	6.17087e-08	down	putative disease resistance protein At4g19050 [Prunus avium]
BMK_Unigene_004301	19	6	13	12	21	20	28	24	59	81	88	43	1.5695	0.000721786	0.00248904	up	copia-type polyprotein [Glycine max]
BMK_Unigene_004303	51	18	25	19	28	26	137	62	35	74	110	58	1.3431	0.00122775	0.00403171	up	vacuolar protein sorting-associated protein 2 homolog 1 [Durio zibethinus]
BMK_Unigene_004321	32	93	4	6	69	5	7	0	6	14	3	0	-3.0094	0.00337083	0.0100695	down	uncharacterized protein LOC112007569 [Quercus suber]
BMK_Unigene_004332	167	149	105	53	123	111	21	17	38	32	35	47	-2.1158	3.24526e-12	3.21049e-11	down	F-box protein At5g03970 [Quercus suber]
BMK_Unigene_004353	167	108	103	161	129	191	220	102	381	702	445	343	1.1153	0.0071412	0.0197094	up	hypothetical protein LSAT_5X177261 [Lactuca sativa]
BMK_Unigene_004354	10	0	1	0	0	4	51	11	16	23	32	51	3.5093	6.28722e-05	0.000261248	up	Pto-like protein kinase, partial [Vigna subterranea]
BMK_Unigene_004366	4	3	4	0	6	4	144	217	151	87	65	187	5.1173	1.20118e-21	2.59525e-20	up	uncharacterized protein LOC105633194 [Jatropha curcas]
BMK_Unigene_004374	7	0	0	0	0	0	20	37	7	14	90	64	5.0885	6.39945e-06	3.10488e-05	up	sugar transporter [Dorcoceras hygrometricum]
BMK_Unigene_004403	0	0	0	0	3	0	1	1	3	25	0	12	3.3279	0.0424207	0.09323	up	PREDICTED: rapid alkalinization factor [Vitis vinifera]
BMK_Unigene_004415	28	24	20	37	31	20	85	54	192	114	88	98	1.7198	1.74884e-06	9.19013e-06	up	PREDICTED: 60S ribosomal protein L5-like isoform X2 [Gossypium hirsutum]
BMK_Unigene_004421	0	0	1	1	2	0	217	75	128	359	218	210	7.8638	2.75022e-21	5.81149e-20	up	1-aminocyclopropane-1-carboxylate oxidase homolog 1-like [Olea europaea var. sylvestris]
BMK_Unigene_004433	144	211	86	119	154	209	1015	687	2942	1631	1896	2451	3.27	1.47753e-22	3.42772e-21	up	PREDICTED: probable AMP deaminase isoform X1 [Daucus carota subsp. sativus]
BMK_Unigene_004437	65	27	18	6	12	12	191	224	85	36	70	80	2.2512	8.94566e-05	0.000362665	up	hypothetical protein PHAVU_005G181100g [Phaseolus vulgaris]
BMK_Unigene_004442	608	190	1177	3641	88	1053	10	16	4	117	15	39	-5.285	2.1802e-10	1.80274e-09	down	isoform 2 of bifunctional th2 protein, mitochondrial [Quercus suber]
BMK_Unigene_004470	861	112	129	43	1788	260	6	8	63	91	11	160	-3.6171	7.00264e-05	0.000288973	down	PREDICTED: uncharacterized protein LOC109151393 [Ipomoea nil]
BMK_Unigene_004473	22	0	103	0	1	0	0	1	1	4	0	0	-4.5529	0.00748256	0.0205513	down	PREDICTED: probable alkaline/neutral invertase B [Ipomoea nil]
BMK_Unigene_004476	71	48	32	28	16	47	447	631	202	248	352	218	3.0291	1.38586e-12	1.42783e-11	up	PREDICTED: inositol-tetrakisphosphate 1-kinase 1 [Vitis vinifera]
BMK_Unigene_004477	77	51	32	10	38	25	13	4	3	3	1	10	-2.9285	1.74281e-06	9.16032e-06	down	uncharacterized protein LOC112001473 [Quercus suber]
BMK_Unigene_004482	158	224	62	38	393	51	5	0	18	14	12	2	-4.4925	1.40719e-09	1.07015e-08	down	PREDICTED: bidirectional sugar transporter SWEET2-like [Pyrus x bretschneideri]
BMK_Unigene_004496	141	70	86	77	143	88	206	239	144	284	230	405	1.0996	0.000529307	0.00187137	up	transcription termination factor MTERF8, chloroplastic-like [Quercus suber]
BMK_Unigene_004511	7	14	13	4	101	38	5	10	0	2	2	5	-3.1342	0.000848467	0.00288298	down	gag-pol, partial [Camellia sinensis]
BMK_Unigene_004524	205	3	196	1748	2	54	7	0	1	14	0	3	-6.6867	4.475e-06	2.2241e-05	down	uncharacterized protein LOC109810662 [Cajanus cajan]
BMK_Unigene_004528	417	550	314	270	339	316	2	3	0	2	3	0	-7.88	3.77043e-53	6.38443e-51	down	protein FAR1-RELATED SEQUENCE 5 [Hevea brasiliensis]
BMK_Unigene_004534	129	96	79	121	35	106	199	228	490	426	248	198	1.472	0.000148822	0.000580878	up	PREDICTED: LAG1 longevity assurance homolog 2 [Juglans regia]
BMK_Unigene_004541	0	0	0	0	1	0	9	8	28	205	32	14	7.7507	4.86233e-09	3.4796e-08	up	uncharacterized protein LOC111406714 [Olea europaea var. sylvestris]
BMK_Unigene_004542	83	71	32	77	28	64	962	321	438	217	1225	105	3.0466	3.39337e-08	2.20604e-07	up	hypothetical protein CISIN_1g020168mg [Citrus sinensis]
BMK_Unigene_004547	17	23	2	0	38	4	2	5	0	0	0	0	-3.6303	0.0105499	0.0278952	down	uncharacterized protein LOC111286779 isoform X1 [Durio zibethinus]
BMK_Unigene_004548	820	185	103	67	186	115	91	41	31	50	21	56	-2.4444	1.15158e-05	5.38424e-05	down	Aldehyde dehydrogenase [Handroanthus impetiginosus]
BMK_Unigene_004558	1737	1812	992	735	1663	1429	539	318	201	86	423	390	-2.2799	8.85469e-09	6.15529e-08	down	hypothetical protein GOBAR_AA09196 [Gossypium barbadense]
BMK_Unigene_004567	186	250	241	182	177	331	2018	1585	2720	2807	2773	2349	3.1611	1.42445e-34	7.84881e-33	up	PREDICTED: uncharacterized protein LOC100258488 isoform X1 [Vitis vinifera]
BMK_Unigene_004579	654	793	424	600	432	498	1022	1217	950	798	1044	1232	0.712	0.00167605	0.00534941	up	PREDICTED: epidermal growth factor receptor substrate 15-like 1 [Solanum pennellii]
BMK_Unigene_004583	4	18	10	0	1	0	30	20	24	7	60	14	2.1337	0.0189387	0.0465481	up	Retrovirus-related Pol polyprotein from transposon TNT 1-94 [Cajanus cajan]
BMK_Unigene_004597	139	136	90	239	96	169	285	69	458	493	585	372	1.1389	0.0158427	0.0398496	up	PREDICTED: S-adenosylmethionine synthase 1 [Nicotiana tomentosiformis]
BMK_Unigene_004606	19	17	97	3	1	10	0	0	0	0	0	4	-5.4728	5.66273e-05	0.000237039	down	PREDICTED: ATP-dependent DNA helicase PIF1-like [Nicotiana sylvestris]
BMK_Unigene_004607	62	17	66	43	23	40	8	12	6	21	8	45	-1.5433	0.00644121	0.0179878	down	PREDICTED: G-type lectin S-receptor-like serine/threonine-protein kinase SD2-5 [Vitis vinifera]
BMK_Unigene_004614	46	37	11	13	8	4	191	135	209	164	189	121	2.9841	2.28042e-11	2.07291e-10	up	hypothetical protein VITISV_019443 [Vitis vinifera]
BMK_Unigene_004615	58	75	21	21	61	20	12	11	5	0	6	18	-2.4761	9.61875e-05	0.000387885	down	Frigida-like [Macleaya cordata]
BMK_Unigene_004636	9	0	1	28	0	0	0	0	0	0	0	1	-5.6611	0.0187864	0.0462273	down	PREDICTED: uncharacterized protein LOC104878418 [Vitis vinifera]
BMK_Unigene_004641	16	0	1	35	16	20	0	6	0	0	0	3	-3.3923	0.0126434	0.0327129	down	cyclophilin [Pinus massoniana]
BMK_Unigene_004642	0	1	0	6	3	1	220	153	47	22	29	212	5.6828	1.13422e-10	9.64286e-10	up	pectinesterase [Jatropha curcas]
BMK_Unigene_004650	390	382	255	319	259	332	589	386	894	831	779	712	0.9014	2.59361e-05	0.00011469	up	Stomatin-like protein 2, mitochondrial [Capsicum chinense]
BMK_Unigene_004651	998	1113	522	415	951	590	1546	1666	1681	1555	1697	1777	0.9244	2.57564e-06	1.32307e-05	up	DNA repair protein UVH3 isoform X1 [Quercus suber]
BMK_Unigene_004653	954	1017	669	749	692	938	201	168	244	134	193	184	-2.3575	5.07455e-35	2.88983e-33	down	PREDICTED: cullin-3A [Nicotiana tomentosiformis]
BMK_Unigene_004662	1976	1435	1540	1489	1037	1662	1164	878	1545	1046	1727	1190	-0.479	0.0309494	0.0711643	down	ABC_tran domain-containing protein [Cephalotus follicularis]
BMK_Unigene_004680	1146	803	731	870	620	652	131	214	150	238	225	172	-2.2593	1.06172e-17	1.70329e-16	down	PREDICTED: uncharacterized protein LOC109236411 [Nicotiana attenuata]
BMK_Unigene_004681	0	0	0	0	0	0	0	3	1	3	11	1	7.5571	0.0430103	0.0942982	up	LOW QUALITY PROTEIN: uncharacterized protein LOC107617224 [Arachis ipaensis]
BMK_Unigene_004690	4789	4918	3813	1907	2546	3584	2113	1765	3015	2292	2181	1725	-0.9018	0.00011959	0.000474227	down	hypothetical protein TSUD_264070 [Trifolium subterraneum]
BMK_Unigene_004697	859	796	664	870	709	680	1269	1178	1656	1535	1864	1571	0.7761	9.60223e-05	0.000387311	up	ARF guanine-nucleotide exchange factor GNOM [Jatropha curcas]
BMK_Unigene_004702	37	88	81	67	172	140	99	254	519	603	270	759	1.7888	0.000281908	0.00104771	up	protein LURP-one-related 8-like [Hevea brasiliensis]
BMK_Unigene_004710	713	933	663	229	638	631	509	229	608	685	358	297	-0.71	0.0419937	0.0924272	down	protein SYS1 homolog isoform X2 [Citrus clementina]
BMK_Unigene_004720	35	38	51	68	9	36	1477	786	1849	1532	1943	1214	5.0087	2.97364e-30	1.22128e-28	up	PREDICTED: uncharacterized protein LOC104611013 [Nelumbo nucifera]
BMK_Unigene_004726	4	6	3	13	6	11	10	11	31	111	0	78	2.2241	0.0149192	0.0378009	up	PREDICTED: indole-3-acetic acid-amido synthetase GH3.6 [Ricinus communis]
BMK_Unigene_004743	628	593	182	175	529	161	29	39	16	12	37	43	-3.8436	7.74113e-18	1.25613e-16	down	PREDICTED: probable UDP-N-acetylglucosamine--peptide N-acetylglucosaminyltransferase SEC [Daucus carota subsp. sativus]
BMK_Unigene_004744	842	39	1231	1468	19	722	4	4	36	89	23	138	-4.1419	4.00872e-06	2.00448e-05	down	unnamed protein product [Coffea canephora]
BMK_Unigene_004745	0	35	0	0	1	0	35	8	18	50	27	64	2.4217	0.0363904	0.0817104	up	hypothetical protein AALP_AA5G167200 [Arabis alpina]
BMK_Unigene_004748	202	0	2	19	5	18	4	1	0	0	0	0	-5.5723	0.000141616	0.000554925	down	PREDICTED: uncharacterized protein LOC104233517 [Nicotiana sylvestris]
BMK_Unigene_004792	14	6	15	38	5	8	100	113	12	118	0	91	2.1854	0.022065	0.0531153	up	cytochrome P450 CYP72A219-like isoform X1 [Olea europaea var. sylvestris]
BMK_Unigene_004803	438	345	268	357	283	270	127	9	199	12	7	37	-2.5996	0.000156243	0.000607522	down	Hist_deacetyl domain-containing protein [Cephalotus follicularis]
BMK_Unigene_004832	4	4	1	1	13	11	30	23	42	5	31	20	1.8477	0.00520867	0.0148767	up	--
BMK_Unigene_004851	27	2	4	76	16	14	0	0	1	0	2	0	-5.8013	3.40324e-06	1.71603e-05	down	hypothetical protein AQUCO_00500349v1 [Aquilegia coerulea]
BMK_Unigene_004886	77	130	59	48	104	105	14	1	0	0	1	8	-4.6508	5.90848e-10	4.67034e-09	down	PREDICTED: probable protein S-acyltransferase 17 isoform X1 [Juglans regia]
BMK_Unigene_004924	4	3	6	12	8	17	9	29	35	26	51	31	1.5974	0.00782948	0.0213912	up	transcription termination factor MTERF15, mitochondrial-like [Olea europaea var. sylvestris]
BMK_Unigene_004925	233	309	64	16	351	46	71	79	39	36	19	93	-1.782	0.00881397	0.0237789	down	wd repeat-containing protein 44 [Quercus suber]
BMK_Unigene_004929	463	701	267	175	582	379	110	115	207	67	143	169	-1.8864	3.17833e-08	2.07232e-07	down	PREDICTED: GPI transamidase component PIG-S isoform X2 [Vitis vinifera]
BMK_Unigene_004940	76	116	38	39	115	63	40	41	50	50	50	59	-0.8443	0.0112164	0.0294253	down	PREDICTED: mRNA cap guanine-N7 methyltransferase 2 isoform X1 [Vitis vinifera]
BMK_Unigene_004946	27	13	20	0	125	14	0	0	2	0	0	0	-7.2026	1.40424e-06	7.46311e-06	down	PREDICTED: uncharacterized protein LOC108198696 [Daucus carota subsp. sativus]
BMK_Unigene_004961	70	50	5	13	88	3	0	1	0	3	6	3	-4.3511	8.2489e-06	3.93624e-05	down	actin-depolymerizing factor 5 [Morus notabilis]
BMK_Unigene_004980	17	121	18	5	102	54	3	1	6	28	0	9	-3.01	0.00129699	0.00424022	down	PREDICTED: flavin-containing monooxygenase FMO GS-OX-like 9 [Nicotiana attenuata]
BMK_Unigene_005000	1019	749	885	937	663	842	72	104	221	95	102	100	-3.1014	3.77509e-24	9.82679e-23	down	unnamed protein product [Coffea canephora]
BMK_Unigene_005023	959	567	18	201	1078	7	43	9	31	73	36	44	-3.8177	6.47019e-06	3.1383e-05	down	Gag-protease-integrase-RT-RNaseH polyprotein [Glycine max]
BMK_Unigene_005031	125	12	33	132	31	13	2	3	1	1	11	18	-3.4696	2.04797e-05	9.20469e-05	down	uncharacterized protein LOC110934713 [Helianthus annuus]
BMK_Unigene_005039	38	30	14	70	31	17	421	419	672	969	664	547	3.991	8.71296e-21	1.77775e-19	up	PREDICTED: alkaline ceramidase 3 [Populus euphratica]
BMK_Unigene_005055	3023	2187	1884	2014	2682	2341	365	193	517	272	8	327	-3.3123	6.14267e-09	4.34544e-08	down	Guanine nucleotide-binding protein, beta subunit [Trema orientalis]
BMK_Unigene_005067	368	272	140	413	265	262	1190	847	1057	1129	1466	1293	1.8166	1.63893e-10	1.37052e-09	up	PREDICTED: cullin-3A [Nicotiana tomentosiformis]
BMK_Unigene_005078	50	43	50	41	46	47	246	139	258	157	175	178	1.8327	5.28635e-13	5.66397e-12	up	uncharacterized protein LOC112033084 [Quercus suber]
BMK_Unigene_005087	328	302	84	34	348	102	102	39	22	41	46	52	-2.1646	6.78868e-05	0.000280644	down	Shikimate kinase-like protein isoform 2 [Theobroma cacao]
BMK_Unigene_005101	436	461	146	127	764	154	50	132	192	196	87	422	-1.2269	0.0364301	0.0817852	down	PREDICTED: uncharacterized protein LOC108999052 [Juglans regia]
BMK_Unigene_005140	83	119	46	85	41	35	150	139	154	74	174	141	0.8671	0.0139065	0.03553	up	hypothetical protein CICLE_v10010827mg [Citrus clementina]
BMK_Unigene_005142	267	332	178	130	290	180	64	151	53	39	74	101	-1.666	2.11729e-05	9.5028e-05	down	PREDICTED: uncharacterized protein LOC105970995 [Erythranthe guttata]
BMK_Unigene_005149	1094	430	859	1764	377	516	363	298	288	640	332	364	-1.3287	0.00175856	0.00558863	down	uncharacterized protein LOC111397380 [Olea europaea var. sylvestris]
BMK_Unigene_005150	156	101	96	32	86	64	4	14	16	8	2	3	-3.6604	9.90602e-12	9.3429e-11	down	PREDICTED: uncharacterized protein LOC109224900 [Nicotiana attenuata]
BMK_Unigene_005165	2116	2209	1707	3526	816	2868	78	83	310	153	198	205	-3.9274	1.13505e-20	2.29659e-19	down	xylosyltransferase 2-like [Dorcoceras hygrometricum]
BMK_Unigene_005167	78	37	22	167	20	9	2	8	1	23	3	41	-2.305	0.00609877	0.0171376	down	unnamed protein product [Coffea canephora]
BMK_Unigene_005168	426	941	294	236	1215	764	337	417	132	267	567	524	-1.0122	0.0393232	0.0873986	down	PREDICTED: homeobox-leucine zipper protein ANTHOCYANINLESS 2 isoform X2 [Vitis vinifera]
BMK_Unigene_005170	40	119	27	20	20	24	0	0	0	0	0	5	-5.8754	5.20652e-09	3.71089e-08	down	hypothetical protein L195_g051607, partial [Trifolium pratense]
BMK_Unigene_005177	86	69	17	8	91	24	4	10	8	0	4	17	-2.992	7.1469e-05	0.000294497	down	PREDICTED: uncharacterized protein LOC9269279 [Oryza sativa Japonica Group]
BMK_Unigene_005188	83	46	31	32	30	65	2001	922	1994	1020	1933	1392	4.8262	1.80612e-55	3.35966e-53	up	xanthine dehydrogenase [Camellia sinensis]
BMK_Unigene_005196	679	658	554	518	554	446	85	41	117	72	89	68	-3.0763	3.59154e-39	2.69197e-37	down	uncharacterized protein LOC112039054 [Quercus suber]
BMK_Unigene_005198	83	220	62	199	55	100	56	66	12	69	37	26	-1.5457	0.00242921	0.00749784	down	taximin [Parasponia andersonii]
BMK_Unigene_005223	118	196	82	47	118	153	90	65	63	65	64	130	-0.7776	0.0227381	0.0545245	down	PREDICTED: putative nuclease HARBI1 [Vitis vinifera]
BMK_Unigene_005225	127	736	71	93	164	169	4111	2434	715	3074	1584	581	3.1195	5.80553e-08	3.67162e-07	up	PREDICTED: probable indole-3-acetic acid-amido synthetase GH3.1 [Theobroma cacao]
BMK_Unigene_005228	408	514	279	150	415	312	587	463	674	711	681	716	0.6779	0.00132163	0.00431495	up	PREDICTED: potassium transporter 7 [Nelumbo nucifera]
BMK_Unigene_005271	228	168	191	249	206	175	22	22	89	30	9	59	-2.6785	6.34878e-09	4.48116e-08	down	PREDICTED: protein GLC8 isoform X1 [Ziziphus jujuba]
BMK_Unigene_005286	40	14	45	201	11	16	720	506	851	603	728	1674	3.7093	3.00158e-07	1.74182e-06	up	phosphatidylinositol 4-kinase gamma 2 [Herrania umbratica]
BMK_Unigene_005290	30	20	7	2	40	3	1841	5652	178	475	1223	612	6.5291	1.56726e-16	2.28882e-15	up	hypothetical protein TSUD_399070 [Trifolium subterraneum]
BMK_Unigene_005293	57	14	335	809	5	79	1166	210	1812	1433	1887	2114	2.4437	0.0144245	0.0367154	up	hexokinase 2 [Camellia sinensis]
BMK_Unigene_005295	53	48	28	9	82	35	26	3	6	14	25	18	-1.711	0.00388938	0.0114533	down	PREDICTED: uncharacterized protein LOC104243051 [Nicotiana sylvestris]
BMK_Unigene_005297	22	45	23	68	8	19	345	141	63	318	249	144	2.6143	6.96277e-06	3.35964e-05	up	uncharacterized protein LOC110425424 [Herrania umbratica]
BMK_Unigene_005308	0	18	0	10	3	5	184	170	198	56	76	208	4.4684	4.40588e-10	3.52969e-09	up	PREDICTED: probable polygalacturonase [Nelumbo nucifera]
BMK_Unigene_005330	400	409	242	149	298	185	201	187	57	91	74	104	-1.3618	0.000699908	0.00242047	down	LOW QUALITY PROTEIN: flagellar radial spoke protein 5 [Quercus suber]
BMK_Unigene_005344	615	452	354	299	260	360	772	947	1046	611	810	991	0.9775	1.88622e-05	8.52428e-05	up	PX domain-containing protein EREL1 isoform X2 [Citrus clementina]
BMK_Unigene_005347	28	37	76	26	89	164	1410	295	2800	111	714	2160	3.8089	1.47588e-08	9.99767e-08	up	hypothetical protein CISIN_1g036243mg, partial [Citrus sinensis]
BMK_Unigene_005381	2717	2931	2264	2801	2955	3204	401	326	766	710	666	529	-2.5497	1.53557e-25	4.41426e-24	down	PREDICTED: ribosome biogenesis protein WDR12 homolog [Daucus carota subsp. sativus]
BMK_Unigene_005382	2417	5188	2158	1443	3873	3336	1509	1674	1743	1348	1571	1922	-1.12	6.23033e-05	0.000259053	down	hypothetical chloroplast RF1 (chloroplast) [Ardisia polysticta]
BMK_Unigene_005405	1103	1112	1028	940	876	825	614	656	826	769	718	816	-0.6219	0.000319912	0.00117643	down	PREDICTED: mediator of RNA polymerase II transcription subunit 12 isoform X1 [Vitis vinifera]
BMK_Unigene_005413	1	0	1	1	0	1	1604	1033	1372	1031	1354	1422	10.7143	2.11536e-45	2.31365e-43	up	PREDICTED: uncharacterized protein LOC100852955 isoform X2 [Vitis vinifera]
BMK_Unigene_005423	481	1480	35	15	2395	81	142	37	24	35	30	48	-4.0831	1.00283e-05	4.72911e-05	down	PREDICTED: putative E3 ubiquitin-protein ligase LIN-1 isoform X3 [Vitis vinifera]
BMK_Unigene_005439	19	16	4	72	0	13	336	337	187	126	223	305	3.4549	1.36006e-05	6.28642e-05	up	Major facilitator superfamily [Corchorus olitorius]
BMK_Unigene_005448	419	286	463	1323	251	472	206	153	294	497	196	262	-1.2294	0.0068879	0.0190836	down	PREDICTED: extra-large guanine nucleotide-binding protein 3 [Malus domestica]
BMK_Unigene_005452	611	1097	19	47	17	55	17	49	0	0	0	3	-4.5855	0.00375887	0.0111023	down	unnamed protein product [Coffea canephora]
BMK_Unigene_005469	705	487	536	579	519	423	333	179	405	311	304	267	-1.0733	4.18616e-06	2.08727e-05	down	hypothetical protein POPTR_011G170000v3 [Populus trichocarpa]
BMK_Unigene_005488	1487	2412	1408	614	1366	1475	0	0	4	0	0	0	-11.502	9.03341e-44	9.01008e-42	down	hypothetical protein [Cyclamen persicum x Cyclamen purpurascens]
BMK_Unigene_005519	240	917	200	87	267	315	23	70	40	23	25	60	-3.1961	2.82899e-10	2.31293e-09	down	unnamed protein product [Coffea canephora]
BMK_Unigene_005539	317	364	212	152	367	198	121	86	81	167	121	167	-1.3241	3.05115e-06	1.55154e-05	down	PREDICTED: uncharacterized protein LOC100244248 isoform X1 [Vitis vinifera]
BMK_Unigene_005544	15	21	17	13	21	17	44	30	32	70	70	40	1.2462	0.000653256	0.00227054	up	F-box/LRR-repeat protein At3g59190-like [Quercus suber]
BMK_Unigene_005548	2476	2296	1601	2595	1691	2374	330	340	1019	913	830	536	-1.9423	1.62388e-09	1.22725e-08	down	uncharacterized protein At3g06530 isoform X1 [Citrus clementina]
BMK_Unigene_005557	45	119	13	80	26	36	98	86	240	627	244	339	2.1787	0.000100499	0.000403833	up	abscisic acid 8&apos;-hydroxylase 3-like [Sesamum indicum]
BMK_Unigene_005563	30	20	1	0	71	11	1	1	2	2	0	3	-4.2117	0.000255108	0.000955774	down	uncharacterized protein LOC111385435 [Olea europaea var. sylvestris]
BMK_Unigene_005568	34	71	33	38	54	49	252	204	352	501	303	331	2.5769	1.17496e-19	2.1912e-18	up	tRNA dimethylallyltransferase 9 [Prunus avium]
BMK_Unigene_005578	10	2	0	0	0	2	43	0	148	46	28	5	4.1332	0.000461309	0.00165101	up	dehydration-responsive element-binding protein 2D-like [Durio zibethinus]
BMK_Unigene_005579	0	5	9	17	2	7	748	637	3589	2949	2503	1488	7.9314	1.13259e-31	5.1085e-30	up	PREDICTED: peptidyl-prolyl cis-trans isomerase FKBP53 [Vitis vinifera]
BMK_Unigene_005587	311	220	134	128	138	247	49	19	5	32	10	25	-3.2156	5.22705e-12	5.0591e-11	down	zinc finger protein [Macleaya cordata]
BMK_Unigene_005589	1	1	2	5	12	10	9	48	2	85	8	29	2.2767	0.0109762	0.0288725	up	sugar transport protein 8-like [Dorcoceras hygrometricum]
BMK_Unigene_005592	151	293	85	23	285	88	2510	1588	981	456	1427	1481	3	2.42619e-09	1.79814e-08	up	starch synthase 3, chloroplastic/amyloplastic [Quercus suber]
BMK_Unigene_005602	221	285	100	71	464	133	21168	10158	7918	6575	21456	13365	5.749	5.29322e-38	3.68056e-36	up	heparan-alpha-glucosaminide N-acetyltransferase isoform X1 [Prunus avium]
BMK_Unigene_005609	160	241	126	109	206	176	1108	995	1088	904	909	1040	2.3653	2.69699e-33	1.35429e-31	up	PREDICTED: ATP-dependent RNA helicase SKI2 isoform X3 [Erythranthe guttata]
BMK_Unigene_005612	1103	700	522	317	557	358	83	120	139	273	89	72	-2.3518	1.53484e-09	1.16254e-08	down	hypothetical protein GOBAR_AA36262 [Gossypium barbadense]
BMK_Unigene_005633	2	2	37	4	22	65	0	2	0	0	4	10	-3.3626	0.00403499	0.0118404	down	PREDICTED: 4-hydroxybenzoate polyprenyltransferase, mitochondrial isoform X2 [Cucumis melo]
BMK_Unigene_005641	711	535	496	419	754	413	107	18	29	82	50	20	-3.646	2.02415e-16	2.93005e-15	down	unnamed protein product, partial [Vitis vinifera]
BMK_Unigene_005647	4	0	0	0	0	0	46	27	19	35	59	28	5.7756	3.99064e-09	2.88667e-08	up	PREDICTED: uncharacterized protein LOC105351850 [Fragaria vesca subsp. vesca]
BMK_Unigene_005650	142	78	71	211	171	228	5	9	0	23	0	28	-4.0292	3.61646e-07	2.0756e-06	down	chloroplast palmitoyl/oleoyl specific acyl-acyl carrier protein thioesterase precursor, partial [Diploknema butyracea]
BMK_Unigene_005654	4046	3530	3970	3375	2878	2718	1588	1668	2909	2580	2096	2611	-0.824	0.000231773	0.000875882	down	PREDICTED: uncharacterized protein LOC100266068 isoform X2 [Vitis vinifera]
BMK_Unigene_005676	12	1	7	1	2	3	2054	768	2530	1586	2874	502	8.4714	1.16215e-44	1.22381e-42	up	unnamed protein product [Coffea canephora]
BMK_Unigene_005677	268	702	5720	5124	250	997	4	1	16	42	2	10	-7.7119	5.67752e-18	9.29858e-17	down	5&apos;-adenylylsulfate reductase 3, chloroplastic-like [Quercus suber]
BMK_Unigene_005687	3386	2773	2687	2353	2214	2303	1326	1483	1938	1170	2043	2004	-0.8585	2.53164e-05	0.000112154	down	hypothetical protein CUMW_184360 [Citrus unshiu]
BMK_Unigene_005695	342	385	232	88	263	172	76	61	58	122	111	146	-1.5547	6.964e-06	3.35991e-05	down	unnamed protein product [Coffea canephora]
BMK_Unigene_005697	1200	934	864	1029	640	1159	2789	1321	3838	3803	3106	2554	1.3643	1.84347e-06	9.65455e-06	up	PREDICTED: dystrophia myotonica WD repeat-containing protein [Theobroma cacao]
BMK_Unigene_005698	328	277	260	244	114	311	2074	3773	1217	2165	1363	1419	2.8575	1.57538e-12	1.61298e-11	up	PREDICTED: uncharacterized protein LOC109005452 [Juglans regia]
BMK_Unigene_005699	0	8	0	3	0	0	103	143	23	119	0	111	5.4753	7.01444e-06	3.38169e-05	up	putative reverse transcriptase domain-containing protein [Helianthus annuus]
BMK_Unigene_005700	16	14	14	4	17	8	2131	1153	629	898	1522	1458	6.5423	4.20298e-60	9.82648e-58	up	protein disulfide isomerase-like 1-6 [Durio zibethinus]
BMK_Unigene_005709	4202	2059	1180	1650	3240	1039	492	370	669	518	497	732	-2.2461	5.04918e-12	4.89439e-11	down	hypothetical protein CISIN_1g008171mg [Citrus sinensis]
BMK_Unigene_005719	6	9	0	4	13	4	702	447	517	442	375	560	6.1548	9.01565e-50	1.24867e-47	up	transmembrane emp24 domain-containing protein p24delta9-like [Manihot esculenta]
BMK_Unigene_005725	517	455	453	576	319	541	611	542	2325	1230	1263	1189	1.0756	0.00313835	0.00944692	up	PREDICTED: armadillo repeat-containing protein 8 [Vitis vinifera]
BMK_Unigene_005731	0	4	3	16	0	9	0	0	2	0	0	0	-4.4529	0.0177358	0.043969	down	O-acyltransferase WSD1-like [Quercus suber]
BMK_Unigene_005734	63	128	45	68	67	29	22	10	19	5	5	23	-2.457	3.96949e-07	2.26457e-06	down	UDP-glycosyltransferase 74F2-like [Herrania umbratica]
BMK_Unigene_005737	31	0	13	2	0	10	3	0	3	0	0	0	-3.4191	0.0328086	0.0747514	down	PREDICTED: uncharacterized protein LOC107418077 [Ziziphus jujuba]
BMK_Unigene_005740	393	731	300	163	590	243	31	151	384	214	21	319	-1.3654	0.0321831	0.0735695	down	TNF receptor-associated factor [Parasponia andersonii]
BMK_Unigene_005741	12	29	23	82	35	42	496	232	1056	534	863	1543	4.1007	2.49457e-14	2.99936e-13	up	PREDICTED: alpha-xylosidase 1-like [Juglans regia]
BMK_Unigene_005753	357	1139	199	55	640	186	25	26	21	46	34	54	-3.8271	4.35107e-12	4.24188e-11	down	probable LRR receptor-like serine/threonine-protein kinase At5g63710 [Sesamum indicum]
BMK_Unigene_005760	22	40	10	24	23	15	544	246	229	161	152	222	3.3687	3.68705e-16	5.22005e-15	up	PREDICTED: dnaJ homolog subfamily B member 4 [Pyrus x bretschneideri]
BMK_Unigene_005777	65	53	68	38	41	34	83	33	198	156	89	164	1.0309	0.0115189	0.03014	up	F-box associated interaction domain-containing protein [Cynara cardunculus var. scolymus]
BMK_Unigene_005791	22	15	11	20	25	35	104	131	9	149	17	57	1.7113	0.00794642	0.0216851	up	PREDICTED: pleiotropic drug resistance protein 2-like [Juglans regia]
BMK_Unigene_005811	178	450	93	79	491	139	421	379	682	451	515	686	0.8767	0.0193766	0.0474869	up	hypothetical protein GOBAR_DD35582 [Gossypium barbadense]
BMK_Unigene_005817	314	354	153	63	323	143	186	144	75	99	107	79	-1.1225	0.00888674	0.0239511	down	PREDICTED: bifunctional protein FolD 1, mitochondrial isoform X1 [Juglans regia]
BMK_Unigene_005835	149	245	37	28	237	73	82	16	19	6	28	15	-2.4017	0.00030774	0.00113585	down	PREDICTED: E3 ubiquitin-protein ligase Os04g0590900-like [Cucumis melo]
BMK_Unigene_005853	107	116	84	89	47	103	279	232	332	215	420	296	1.5162	2.28208e-08	1.51193e-07	up	hypothetical protein Ccrd_019964, partial [Cynara cardunculus var. scolymus]
BMK_Unigene_005858	425	412	260	99	272	274	4	18	4	8	1	7	-5.4606	9.99623e-26	2.9197e-24	down	coproporphyrinogen-III oxidase 1, chloroplastic [Sesamum indicum]
BMK_Unigene_005861	325	344	252	177	235	306	83	84	55	91	89	111	-1.8538	1.73976e-15	2.31822e-14	down	hypothetical protein CUMW_198130 [Citrus unshiu]
BMK_Unigene_005881	1	21	4	6	8	1	50	28	47	55	44	78	2.6769	4.34859e-06	2.16346e-05	up	PREDICTED: uncharacterized protein LOC103935614 isoform X2 [Pyrus x bretschneideri]
BMK_Unigene_005890	80	220	48	45	183	59	361	216	397	418	380	254	1.4526	8.52925e-05	0.000346915	up	plastidal glycolate/glycerate translocator 1, chloroplastic [Arachis ipaensis]
BMK_Unigene_005910	4	0	0	3	0	0	481	207	55	2	70	66	6.9321	1.90505e-09	1.43021e-08	up	PREDICTED: polyol transporter 5-like [Nicotiana attenuata]
BMK_Unigene_005919	2932	2061	1694	2210	2674	2480	1015	998	2132	2659	1797	1438	-0.7152	0.011676	0.0304791	down	PREDICTED: probable mediator of RNA polymerase II transcription subunit 36b [Solanum pennellii]
BMK_Unigene_005922	1028	1176	1292	879	1612	1380	805	596	687	628	625	802	-1.0644	7.11135e-06	3.4242e-05	down	unnamed protein product [Coffea canephora]
BMK_Unigene_005944	83	161	115	210	104	194	15	1	47	39	151	13	-1.9544	0.00499601	0.0143255	down	uncharacterized protein LOC109726334 [Ananas comosus]
BMK_Unigene_005945	324	340	135	153	272	151	197	197	173	88	103	201	-0.6937	0.0400332	0.0887637	down	PREDICTED: uncharacterized protein LOC108209730 [Daucus carota subsp. sativus]
BMK_Unigene_005977	15	32	7	4	42	13	38	52	94	38	114	72	1.5868	0.00114326	0.00377884	up	cyclin-dependent kinase D-3 isoform X1 [Sesamum indicum]
BMK_Unigene_005986	106	187	105	97	126	101	72	82	114	75	71	99	-0.7015	0.00376551	0.0111174	down	PREDICTED: uncharacterized protein LOC108987985 [Juglans regia]
BMK_Unigene_006001	188	193	86	100	241	61	486	305	442	390	417	438	1.2909	9.98342e-06	4.70926e-05	up	PREDICTED: GDP-mannose transporter GONST1 isoform X2 [Vitis vinifera]
BMK_Unigene_006007	218	547	279	61	623	259	0	0	2	1	0	0	-9.7358	3.59688e-22	8.09028e-21	down	PREDICTED: protein DETOXIFICATION 40-like isoform X2 [Juglans regia]
BMK_Unigene_006043	90	145	12	1	135	51	3	20	13	4	4	28	-2.7901	0.00133412	0.00435294	down	PREDICTED: 3-oxoacyl-[acyl-carrier-protein] synthase II, chloroplastic-like isoform X2 [Nelumbo nucifera]
BMK_Unigene_006046	383	299	218	282	279	266	651	417	1415	728	732	701	1.1922	4.67799e-06	2.31663e-05	up	PREDICTED: F-box/LRR-repeat protein At3g48880 [Ricinus communis]
BMK_Unigene_006050	1246	1109	684	1026	1268	909	183	76	101	128	149	167	-3.175	7.67753e-37	4.97848e-35	down	PREDICTED: F-box/LRR-repeat protein At5g63520-like [Nicotiana tabacum]
BMK_Unigene_006057	176	200	161	114	118	143	30	53	76	55	32	82	-1.6785	3.6045e-08	2.33554e-07	down	hypothetical protein CRG98_000015 [Punica granatum]
BMK_Unigene_006061	26	104	29	522	102	77	71	26	479	3657	288	103	2.18	0.0408338	0.0902484	up	PREDICTED: uncharacterized protein LOC104446483 [Eucalyptus grandis]
BMK_Unigene_006063	952	875	494	587	866	527	22	32	121	68	58	10	-4.0274	8.45251e-18	1.36677e-16	down	PREDICTED: phospholipid:diacylglycerol acyltransferase 1-like [Nelumbo nucifera]
BMK_Unigene_006078	10	60	15	14	35	10	74	310	308	172	158	230	2.9282	3.05688e-09	2.24048e-08	up	PREDICTED: uncharacterized protein LOC100241927 isoform X1 [Vitis vinifera]
BMK_Unigene_006099	1666	1844	1067	1265	1951	1381	500	571	778	544	541	490	-1.6364	8.74606e-16	1.19798e-14	down	PREDICTED: THO complex subunit 2 isoform X4 [Vitis vinifera]
BMK_Unigene_006124	347	1088	652	618	222	1058	294	266	129	174	185	155	-1.8714	1.07549e-05	5.05073e-05	down	Zinc finger, RING-CH-type [Corchorus olitorius]
BMK_Unigene_006141	1366	2165	1100	1089	1533	1243	1165	763	853	437	812	772	-1.0157	9.27059e-05	0.000374854	down	Hydroxyacylglutathione hydrolase cytoplasmic family protein [Populus trichocarpa]
BMK_Unigene_006155	103	109	44	62	156	37	3	0	23	0	0	0	-4.6881	7.85389e-06	3.76007e-05	down	PREDICTED: uncharacterized protein LOC100250192 isoform X2 [Vitis vinifera]
BMK_Unigene_006167	4245	115	3988	7300	191	2574	106	29	37	5	163	117	-5.5426	2.88016e-11	2.59724e-10	down	PREDICTED: calcium-transporting ATPase 12, plasma membrane-type-like [Daucus carota subsp. sativus]
BMK_Unigene_006180	1584	2674	758	218	2780	684	994	546	279	225	239	581	-1.7884	0.00218997	0.00682724	down	PREDICTED: protein MARD1 [Nelumbo nucifera]
BMK_Unigene_006183	58	88	45	45	62	121	206	172	129	188	222	218	1.2415	4.69666e-05	0.0001992	up	hypothetical protein AQUCO_04500066v1 [Aquilegia coerulea]
BMK_Unigene_006202	38	28	42	30	11	15	2523	1648	621	587	2107	1149	5.5857	5.24016e-30	2.0882e-28	up	hypothetical protein HannXRQ_Chr06g0171351 [Helianthus annuus]
BMK_Unigene_006203	486	204	152	198	395	284	83	38	153	273	85	101	-1.4657	0.00103753	0.00345785	down	PREDICTED: pentatricopeptide repeat-containing protein At5g12100, mitochondrial-like [Pyrus x bretschneideri]
BMK_Unigene_006219	333	331	187	170	269	194	1441	1816	1195	2176	1560	2105	2.6195	3.39742e-30	1.38528e-28	up	PREDICTED: nucleolar protein 10 [Nelumbo nucifera]
BMK_Unigene_006222	1816	2275	1943	852	1011	1154	3426	2967	3396	2835	5517	8190	1.3493	5.48313e-05	0.000230107	up	PREDICTED: homeobox-leucine zipper protein HAT5-like [Fragaria vesca subsp. vesca]
BMK_Unigene_006226	747	662	1338	754	600	735	138	175	169	170	140	215	-2.472	4.3523e-15	5.59747e-14	down	protein CIA1-like isoform X2 [Olea europaea var. sylvestris]
BMK_Unigene_006230	5	2	0	25	8	18	0	1	0	0	3	0	-4.0697	0.00303303	0.00916073	down	hypothetical protein AXG93_2587s1170 [Marchantia polymorpha subsp. ruderalis]
BMK_Unigene_006234	417	446	306	312	366	344	83	7	33	68	91	10	-3.1087	2.23172e-09	1.66028e-08	down	hypothetical protein CICLE_v10009013mg [Citrus clementina]
BMK_Unigene_006245	1543	1220	1030	878	502	1275	284	342	399	148	281	353	-2.0045	1.2429e-10	1.05124e-09	down	PREDICTED: NAC domain-containing protein 78-like [Nicotiana attenuata]
BMK_Unigene_006253	105	159	62	74	273	117	8	28	16	24	23	38	-2.7739	2.41179e-09	1.78773e-08	down	PREDICTED: pentatricopeptide repeat-containing protein At3g26782, mitochondrial isoform X2 [Nelumbo nucifera]
BMK_Unigene_006260	66	69	82	101	46	68	228	134	508	292	538	237	1.9269	1.49427e-06	7.9226e-06	up	unnamed protein product [Coffea canephora]
BMK_Unigene_006272	431	958	781	6223	139	3078	491	474	232	1017	230	334	-2.257	0.00135597	0.00441859	down	NADPH oxidase A [Camellia sinensis]
BMK_Unigene_006292	2339	2414	1087	377	3781	855	33	13	14	9	48	66	-6.1495	1.52563e-27	5.04269e-26	down	trehalose-phosphate synthase 6 [Camellia sinensis]
BMK_Unigene_006295	401	500	268	150	632	236	18	5	80	11	12	27	-4.1614	1.15681e-13	1.30849e-12	down	PREDICTED: 7-deoxyloganetin glucosyltransferase-like [Ziziphus jujuba]
BMK_Unigene_006327	459	630	406	181	485	340	20	15	48	5	8	34	-4.518	3.75712e-22	8.44325e-21	down	PREDICTED: protein phosphatase 1 regulatory subunit 7 [Vitis vinifera]
BMK_Unigene_006363	84	21	277	2	254	288	28	7	7	3	2	1	-4.5183	1.14571e-06	6.16364e-06	down	long-chain-fatty-acid--amp ligase fadd28 [Quercus suber]
BMK_Unigene_006367	1011	1134	730	277	852	334	378	345	417	207	404	259	-1.2867	0.000269782	0.00100631	down	uncharacterized protein LOC110812316 [Carica papaya]
BMK_Unigene_006376	140	131	87	39	40	59	312	171	446	447	233	470	1.8968	6.69188e-08	4.20039e-07	up	PREDICTED: cysteine-rich repeat secretory protein 3 [Nicotiana sylvestris]
BMK_Unigene_006382	34	25	21	147	12	3	138	306	263	180	111	234	2.1599	0.00498339	0.0142963	up	probable rhamnogalacturonate lyase B isoform X4 [Sesamum indicum]
BMK_Unigene_006397	3	4	7	11	2	5	8	3	32	39	21	58	2.0525	0.00681887	0.0189155	up	uncharacterized protein At4g06744-like [Lactuca sativa]
BMK_Unigene_006398	2174	1198	1656	1903	909	1293	44	38	23	29	51	59	-5.4045	2.90606e-56	5.54741e-54	down	PREDICTED: exocyst complex component EXO70B1 [Vitis vinifera]
BMK_Unigene_006412	1027	1061	876	989	670	1325	597	582	918	966	913	810	-0.5207	0.0231087	0.0553375	down	PREDICTED: protein disulfide isomerase-like 5-4 [Vitis vinifera]
BMK_Unigene_006417	16	11	0	20	3	8	51	26	85	53	59	73	2.3903	7.02223e-05	0.000289711	up	Rhomboid-like protein 11, chloroplastic [Ananas comosus]
BMK_Unigene_006426	314	321	287	208	326	347	245	222	263	244	309	304	-0.3996	0.0338229	0.076733	down	hypothetical protein POPTR_008G043000v3 [Populus trichocarpa]
BMK_Unigene_006429	47	142	8	16	89	21	12	10	3	8	10	36	-2.2316	0.00207897	0.00650706	down	PREDICTED: phosphoglycolate phosphatase [Vigna angularis]
BMK_Unigene_006466	24	94	38	12	31	21	137	160	72	70	143	79	1.4683	0.00141152	0.00458057	up	ultraviolet-b receptor uvr8 [Quercus suber]
BMK_Unigene_006467	321	420	296	267	344	380	99	78	60	54	110	168	-2.0457	6.20363e-12	5.96017e-11	down	unnamed protein product, partial [Vitis vinifera]
BMK_Unigene_006473	7	9	0	16	22	16	0	3	0	0	0	0	-4.5502	0.000834981	0.0028417	down	glycine-rich RNA-binding protein [Picea glauca]
BMK_Unigene_006474	1	6	4	22	0	0	430	472	733	779	491	711	6.5605	9.57901e-17	1.42339e-15	up	Bromodomain domain-containing protein [Cephalotus follicularis]
BMK_Unigene_006491	981	772	606	565	761	466	55	136	75	139	88	140	-2.8874	7.29425e-21	1.49969e-19	down	NTP_transf_2 domain-containing protein/PAP_assoc domain-containing protein [Cephalotus follicularis]
BMK_Unigene_006500	581	367	474	457	177	470	922	336	1798	984	969	1136	1.0552	0.0074789	0.0205424	up	actin-depolymerizing factor-like [Manihot esculenta]
BMK_Unigene_006509	67	72	0	11	159	11	15	21	4	5	7	32	-2.1706	0.0270463	0.0633487	down	cytochrome P450 94B3-like [Quercus suber]
BMK_Unigene_006569	87	48	34	62	4	65	3268	2356	2028	1996	2001	2766	5.4521	1.22992e-30	5.20222e-29	up	PREDICTED: receptor-like protein kinase FERONIA [Pyrus x bretschneideri]
BMK_Unigene_006618	123	77	45	80	42	60	117	152	172	241	170	210	1.1484	0.000140952	0.000552447	up	PREDICTED: uncharacterized protein LOC104210125 [Nicotiana sylvestris]
BMK_Unigene_006619	11	36	4	6	39	8	70	53	344	263	111	160	2.9669	2.17559e-07	1.28147e-06	up	WD40 domain-containing protein [Cephalotus follicularis]
BMK_Unigene_006632	476	514	326	154	489	307	262	149	296	198	323	287	-0.8011	0.00481112	0.013857	down	PREDICTED: probable glucuronoxylan glucuronosyltransferase F8H [Nelumbo nucifera]
BMK_Unigene_006637	1455	1454	845	819	1414	1016	355	219	381	355	225	335	-2.1194	4.54025e-26	1.36604e-24	down	unnamed protein product [Coffea canephora]
BMK_Unigene_006654	219	94	89	28	62	114	946	1234	118	121	310	235	2.2478	0.000379715	0.00137923	up	PREDICTED: integrin-linked protein kinase homolog pat-4-like isoform X2 [Nicotiana tomentosiformis]
BMK_Unigene_006655	0	35	8	3	0	0	0	0	0	0	0	0	-8.8816	0.0182615	0.045075	down	PREDICTED: acid phosphatase 1 isoform X2 [Theobroma cacao]
BMK_Unigene_006656	19	78	35	33	15	36	0	0	0	0	2	0	-6.8765	2.51885e-11	2.28273e-10	down	uncharacterized protein LOC111997418 isoform X2 [Quercus suber]
BMK_Unigene_006659	580	877	367	436	356	443	174	123	195	148	123	168	-1.8948	1.1012e-17	1.76386e-16	down	PREDICTED: uncharacterized protein LOC104453439 isoform X1 [Eucalyptus grandis]
BMK_Unigene_006676	50	82	17	25	87	12	463	527	488	658	653	756	3.4847	1.59565e-17	2.51943e-16	up	hypothetical protein BVC80_1707g137 [Macleaya cordata]
BMK_Unigene_006677	297	285	118	161	319	156	39	59	66	44	48	77	-2.2152	1.0061e-13	1.14283e-12	down	PREDICTED: protein EARLY FLOWERING 3 [Ricinus communis]
BMK_Unigene_006679	0	0	0	0	0	0	6	4	22	1	14	10	9.0453	5.03291e-05	0.000212402	up	probable F-box protein At5g04010 [Olea europaea var. sylvestris]
BMK_Unigene_006685	58	40	19	15	25	12	1	13	14	2	6	9	-2.0554	0.00109026	0.00361703	down	PREDICTED: uncharacterized protein LOC109157794 [Ipomoea nil]
BMK_Unigene_006697	52	41	20	57	54	46	642	441	1873	2288	1800	766	4.6056	3.0168e-26	9.1907e-25	up	hypothetical protein CISIN_1g006594mg [Citrus sinensis]
BMK_Unigene_006702	890	912	694	100	1229	328	2960	2847	964	577	828	1385	1.0441	0.0466671	0.101119	up	PREDICTED: uncharacterized protein At2g27730, mitochondrial [Solanum lycopersicum]
BMK_Unigene_006713	691	563	380	446	651	407	2	1	0	10	3	0	-7.7935	1.11602e-44	1.17766e-42	down	mitochondrial carrier protein MTM1 [Prunus persica]
BMK_Unigene_006723	17	22	18	10	33	17	76	57	44	59	71	31	1.3162	0.000548293	0.001933	up	uncharacterized protein LOC21408462 [Morus notabilis]
BMK_Unigene_006725	158	150	126	100	164	169	881	740	526	512	575	900	2.0536	5.91445e-16	8.22953e-15	up	glucose-6-phosphate isomerase 1, chloroplastic [Citrus clementina]
BMK_Unigene_006739	7	10	6	82	7	0	518	301	501	515	511	436	4.3971	1.65697e-07	9.91689e-07	up	unnamed protein product [Coffea canephora]
BMK_Unigene_006747	33	12	4	4	9	10	51	29	75	45	36	22	1.691	0.00059867	0.00209553	up	acyl-CoA-binding domain-containing protein 3-like [Prunus avium]
BMK_Unigene_006768	162	289	22	18	1470	21	1	2	9	0	4	9	-6.7633	1.50597e-10	1.26285e-09	down	dormancy/auxin associated protein [Medicago truncatula]
BMK_Unigene_006770	208	206	83	98	204	86	14	38	58	33	21	37	-2.3483	1.37291e-09	1.0458e-08	down	PREDICTED: pentatricopeptide repeat-containing protein At2g35130-like isoform X1 [Nicotiana sylvestris]
BMK_Unigene_006778	16	13	2	7	22	12	1039	726	1521	855	1250	990	6.2215	3.63973e-70	1.27938e-67	up	PREDICTED: translation initiation factor IF-2 [Prunus mume]
BMK_Unigene_006780	19	12	4	13	14	7	40	22	70	110	57	106	2.3213	6.37154e-07	3.54796e-06	up	putative reverse transcriptase family member [Malus domestica]
BMK_Unigene_006790	116	61	148	59	66	71	45	52	39	64	91	24	-0.9019	0.0251333	0.0594456	down	PREDICTED: uncharacterized protein LOC104598027 [Nelumbo nucifera]
BMK_Unigene_006797	128	126	65	154	98	48	28	33	22	23	16	16	-2.3226	4.12641e-09	2.97981e-08	down	Cysteine-rich RLK (receptor-like protein kinase) 8 [Dorcoceras hygrometricum]
BMK_Unigene_006824	37	169	33	39	74	158	4	8	1	13	17	0	-3.7098	4.80413e-07	2.7155e-06	down	NADPH-dependent FMN reductase [Corchorus olitorius]
BMK_Unigene_006848	27	7	3	4	5	2	0	4	3	0	1	4	-2.0791	0.0389401	0.0867097	down	PREDICTED: uncharacterized protein LOC101500293 [Cicer arietinum]
BMK_Unigene_006854	90	107	57	21	43	80	45	22	11	26	19	12	-1.6823	0.000263521	0.000984831	down	uncharacterized protein LOC111275084 isoform X4 [Durio zibethinus]
BMK_Unigene_006858	410	1098	1231	564	272	630	2712	312	7232	12024	5254	5444	2.7427	1.12978e-05	5.28716e-05	up	auxin transport carrier [Camellia sinensis]
BMK_Unigene_006868	139	127	55	25	113	56	179	172	237	245	284	204	1.1721	0.000154628	0.000601565	up	hypothetical protein VITISV_037104 [Vitis vinifera]
BMK_Unigene_006876	7	26	4	6	1	35	138	111	52	170	125	179	3.1442	4.67927e-07	2.64786e-06	up	transcription factor bHLH66-like [Olea europaea var. sylvestris]
BMK_Unigene_006878	798	971	266	707	973	622	296	677	214	313	145	230	-1.3468	0.00303433	0.00916413	down	PREDICTED: uncharacterized protein LOC108218609 [Daucus carota subsp. sativus]
BMK_Unigene_006879	13	127	5	21	27	52	0	4	8	2	6	15	-3.0064	0.00025574	0.00095772	down	PREDICTED: uncharacterized protein LOC107945189 isoform X4 [Gossypium hirsutum]
BMK_Unigene_006881	90	51	1	7	69	5	1	0	6	12	0	9	-3.2303	0.00348544	0.0103765	down	PREDICTED: protein DETOXIFICATION 12-like [Nicotiana tomentosiformis]
BMK_Unigene_006895	581	460	289	148	400	423	83	123	195	148	130	121	-1.7207	6.05965e-09	4.28956e-08	down	pentatricopeptide repeat-containing protein At2g41720 isoform X2 [Quercus suber]
BMK_Unigene_006905	482	895	352	182	658	262	263	126	78	110	124	68	-2.0407	2.70168e-06	1.38405e-05	down	aspartic proteinase [Camellia sinensis]
BMK_Unigene_006915	55	35	38	7	38	11	0	2	0	0	0	9	-4.2937	1.85717e-05	8.4037e-05	down	hypothetical protein PAHAL_I01513 [Panicum hallii]
BMK_Unigene_006916	543	413	422	298	317	353	186	120	324	150	341	105	-1.1453	0.000437462	0.00157107	down	uncharacterized protein LOC111370625 isoform X1 [Olea europaea var. sylvestris]
BMK_Unigene_006917	283	182	356	288	121	261	421	438	992	575	507	821	1.1041	0.00386402	0.0113865	up	increased DNA methylation 1-like [Quercus suber]
BMK_Unigene_006925	520	548	374	227	379	397	191	167	231	227	223	113	-1.2681	2.16084e-07	1.27381e-06	down	uncharacterized protein LOC105628245 [Jatropha curcas]
BMK_Unigene_006956	0	0	0	0	2	0	14	11	3	0	8	5	3.9542	0.00595559	0.0167741	up	hypothetical protein CFOL_v3_15078, partial [Cephalotus follicularis]
BMK_Unigene_006964	129	110	105	107	101	152	802	353	1493	1127	973	548	2.6718	9.64866e-16	1.31772e-14	up	transcription initiation factor IIF subunit beta isoform X2 [Sesamum indicum]
BMK_Unigene_006975	12	2	4	5	11	8	43	53	116	94	67	66	3.1258	3.63712e-12	3.57043e-11	up	PREDICTED: uncharacterized protein LOC100262792 [Vitis vinifera]
BMK_Unigene_006977	12	19	3	27	22	1	3605	4910	4231	3557	3673	3631	7.9227	2.87042e-53	4.90995e-51	up	LHY [Camellia sinensis]
BMK_Unigene_006984	86	7	15	25	29	7	17	17	0	1	4	7	-1.9305	0.0290457	0.0673838	down	permease, partial [Mucor ambiguus]
BMK_Unigene_007003	0	0	1	0	0	1	27	18	42	24	35	28	6.1541	1.25034e-10	1.05736e-09	up	--
BMK_Unigene_007011	55	74	30	54	40	23	45	33	267	88	103	210	1.1758	0.0146929	0.0373055	up	hypothetical protein HannXRQ_Chr06g0183291 [Helianthus annuus]
BMK_Unigene_007014	2488	2226	1889	2245	1516	2332	976	711	317	139	1356	1300	-1.5891	0.00053109	0.00187676	down	PREDICTED: uncharacterized protein LOC104594912 isoform X1 [Nelumbo nucifera]
BMK_Unigene_007022	842	975	760	913	1105	1142	28	122	108	121	93	197	-3.3302	1.96248e-18	3.33524e-17	down	poly(A)-specific ribonuclease PARN-like [Herrania umbratica]
BMK_Unigene_007025	600	571	446	409	522	525	917	596	1240	1200	1281	859	0.7696	0.000120055	0.00047596	up	PREDICTED: uncharacterized RNA-binding protein C1827.05c-like [Capsicum annuum]
BMK_Unigene_007047	63	91	29	27	10	42	1307	377	540	448	639	441	3.7245	5.32043e-17	8.04426e-16	up	PREDICTED: plant intracellular Ras-group-related LRR protein 4-like [Nicotiana sylvestris]
BMK_Unigene_007066	1337	1227	472	281	687	406	657	631	345	226	297	355	-0.9221	0.0319544	0.0731083	down	Lipoyl synthase [Macleaya cordata]
BMK_Unigene_007071	808	609	543	432	945	774	1294	1036	1577	1277	1723	1101	0.7315	0.00107488	0.0035709	up	peroxisomal membrane protein 11C [Sesamum indicum]
BMK_Unigene_007087	112	184	107	106	591	215	1	7	6	1	7	3	-5.9968	4.72776e-21	9.84733e-20	down	WRKY transcription factor 22-like [Durio zibethinus]
BMK_Unigene_007105	37	61	16	24	29	17	542	109	739	139	399	227	3.3374	9.91911e-13	1.03598e-11	up	hypothetical protein POPTR_006G086000v3 [Populus trichocarpa]
BMK_Unigene_007134	0	4	0	0	0	0	43	41	1	8	19	27	5.1447	4.70474e-05	0.00019951	up	serine/threonine receptor-like kinase NFP [Lactuca sativa]
BMK_Unigene_007157	3	5	0	2	2	6	17	1	11	9	2	42	1.9381	0.0319063	0.0730089	up	heavy metal-associated isoprenylated plant protein 35-like [Lactuca sativa]
BMK_Unigene_007159	39221	29629	10971	5889	21108	18780	1940	591	535	279	830	397	-4.9173	1.70395e-23	4.23231e-22	down	phospholipase D alpha 1 [Sesamum indicum]
BMK_Unigene_007160	650	1133	436	860	544	876	1514	1998	3119	2309	1848	1938	1.3016	3.34938e-06	1.69138e-05	up	mitochondrial outer membrane protein porin of 34 kDa [Quercus suber]
BMK_Unigene_007169	120	96	76	110	158	94	282	306	581	476	317	403	1.6051	3.54444e-09	2.57781e-08	up	hypothetical protein TorRG33x02_126460 [Trema orientalis]
BMK_Unigene_007171	15	64	19	17	126	28	74	95	83	217	112	129	1.1113	0.0257609	0.0607889	up	PREDICTED: probable inactive tRNA-specific adenosine deaminase-like protein 3 isoform X3 [Prunus mume]
BMK_Unigene_007173	20	19	20	6	21	23	243	46	99	96	92	27	2.2611	1.3124e-05	6.08039e-05	up	PREDICTED: putative pentatricopeptide repeat-containing protein At1g64310 [Juglans regia]
BMK_Unigene_007178	0	0	0	8	0	4	41	10	39	160	47	21	4.4736	3.97635e-05	0.000170652	up	aprr7, partial [Populus tremula]
BMK_Unigene_007179	493	377	247	182	215	199	434	371	768	406	608	533	0.6823	0.00449437	0.0130427	up	golgin candidate 2 [Olea europaea var. sylvestris]
BMK_Unigene_007182	355	378	237	112	399	221	56	24	88	115	50	25	-2.4759	6.63249e-09	4.6717e-08	down	PREDICTED: pre-mRNA-splicing factor ATP-dependent RNA helicase DEAH10-like isoform X2 [Ipomoea nil]
BMK_Unigene_007184	710	1235	582	256	328	380	157	212	93	131	90	175	-2.132	4.17771e-08	2.69054e-07	down	ferritin-2, chloroplastic [Sesamum indicum]
BMK_Unigene_007196	97	110	81	74	121	63	36	61	88	54	56	49	-0.8876	0.0029469	0.00892388	down	ras-related protein RABB1b [Cucurbita maxima]
BMK_Unigene_007199	178	128	177	128	139	136	15	40	38	34	16	34	-2.5193	3.38878e-13	3.67958e-12	down	membrane-anchored ubiquitin-fold protein 3 [Dorcoceras hygrometricum]
BMK_Unigene_007202	100	118	74	63	70	65	49	18	32	27	49	40	-1.3818	1.32042e-06	7.05074e-06	down	hypothetical protein L484_027900 [Morus notabilis]
BMK_Unigene_007204	0	5	0	0	3	5	122	262	153	136	231	191	6.1896	1.14887e-24	3.12463e-23	up	PREDICTED: heat stress transcription factor B-2b [Vitis vinifera]
BMK_Unigene_007207	846	1034	887	705	583	849	1402	1223	1220	1013	1598	1457	0.5041	0.0246453	0.0584433	up	hypothetical protein CFOL_v3_24341 [Cephalotus follicularis]
BMK_Unigene_007211	1233	873	768	1667	727	969	2790	2247	2103	4264	3357	4241	1.4067	3.85553e-05	0.000165872	up	PREDICTED: G-type lectin S-receptor-like serine/threonine-protein kinase SD1-29 [Solanum tuberosum]
BMK_Unigene_007216	2	0	18	24	0	27	47	19	375	250	191	1163	4.5098	2.7328e-05	0.000120354	up	Ctr copper transporter [Corchorus olitorius]
BMK_Unigene_007220	6	7	11	4	0	16	144	184	367	364	223	212	4.8839	3.25661e-20	6.34249e-19	up	mitochondrial thiamine diphosphate carrier 2-like isoform X1 [Olea europaea var. sylvestris]
BMK_Unigene_007225	10	10	6	3	3	8	119	59	36	114	76	77	3.4523	6.79505e-14	7.84439e-13	up	unnamed protein product [Coffea canephora]
BMK_Unigene_007227	139	19	81	278	10	57	11	6	122	39	17	29	-1.6717	0.0261616	0.0615834	down	eukaryotic translation initiation factor 1A-like isoform X1 [Durio zibethinus]
BMK_Unigene_007228	14	58	16	15	11	3	3331	2227	6431	5938	5984	3675	7.7241	1.02982e-57	2.13365e-55	up	PREDICTED: nodal modulator 1 [Vitis vinifera]
BMK_Unigene_007235	81	26	4	30	17	16	417	908	1557	2147	986	1192	5.2323	8.01184e-24	2.0397e-22	up	anthranilate synthase alpha-subunit 2 [Mitragyna speciosa]
BMK_Unigene_007237	560	631	308	127	426	365	1423	1602	1557	669	1403	913	1.4854	6.70777e-06	3.24714e-05	up	PREDICTED: probable solanesyl-diphosphate synthase 3, chloroplastic [Daucus carota subsp. sativus]
BMK_Unigene_007245	48	19	89	59	39	40	222	179	409	309	208	347	2.2547	2.30619e-07	1.35448e-06	up	Clathrin light chain 1 [Apostasia shenzhenica]
BMK_Unigene_007249	736	212	1969	7328	137	1493	350	198	289	1492	190	239	-2.3313	0.00258342	0.00793011	down	hypothetical protein BC332_24673 [Capsicum chinense]
BMK_Unigene_007250	124	202	87	78	124	195	6	37	12	79	23	65	-2.0522	0.000176954	0.00068238	down	hypothetical protein MIMGU_mgv1a004344mg [Erythranthe guttata]
BMK_Unigene_007256	290	427	228	236	386	266	418	370	500	520	493	530	0.409	0.0180695	0.044665	up	RRM_1 domain-containing protein [Cephalotus follicularis]
BMK_Unigene_007264	165	205	310	138	163	109	65	46	10	30	22	56	-2.4223	1.91218e-07	1.13523e-06	down	protein disulfide-isomerase LQY1, chloroplastic [Vigna radiata var. radiata]
BMK_Unigene_007271	89	82	180	101	63	108	31	2	86	38	22	28	-1.8758	0.000854914	0.00290237	down	E3 ubiquitin-protein ligase SINA-like 10 [Arachis duranensis]
BMK_Unigene_007276	48	132	49	41	62	61	31	17	44	45	35	30	-1.1674	0.00081011	0.00276574	down	WAT1-related protein At4g19185 isoform X2 [Sesamum indicum]
BMK_Unigene_007290	778	700	633	602	648	867	108	34	66	45	289	43	-3.0649	1.745e-10	1.45516e-09	down	unnamed protein product [Coffea canephora]
BMK_Unigene_007294	30	5	14	498	16	12	257	580	1236	53812	1973	96171	7.7602	1.65468e-07	9.90554e-07	up	pathogenesis-related protein 1, partial [Musa acuminata]
BMK_Unigene_007299	5	8	5	22	1	5	167	226	125	221	253	265	4.6008	2.92218e-16	4.1766e-15	up	PREDICTED: uncharacterized protein LOC100852813 [Vitis vinifera]
BMK_Unigene_007306	3779	3818	5548	7962	2169	6148	3076	2237	2601	4536	4147	3278	-0.7744	0.0251477	0.0594717	down	PREDICTED: ribonuclease TUDOR 1 [Vitis vinifera]
BMK_Unigene_007307	259	219	203	242	159	203	552	548	928	805	722	693	1.5191	2.19783e-11	2.00177e-10	up	unnamed protein product [Coffea canephora]
BMK_Unigene_007308	539	105	570	1209	24	313	50	21	23	47	52	41	-3.7563	1.41159e-08	9.57619e-08	down	--
BMK_Unigene_007310	1200	1020	972	766	429	2067	392	561	224	423	397	475	-1.5371	6.32101e-05	0.000262502	down	formin-like protein 5 isoform X2 [Sesamum indicum]
BMK_Unigene_007312	1578	1416	1009	818	1035	959	360	601	512	372	373	653	-1.423	3.19349e-09	2.33524e-08	down	PREDICTED: transcriptional corepressor LEUNIG isoform X1 [Fragaria vesca subsp. vesca]
BMK_Unigene_007315	2513	2545	1338	1484	2427	1528	1633	779	598	546	1848	1120	-1.0507	0.00233514	0.00723642	down	U4/U6-associated splicing factor PRP4 [Handroanthus impetiginosus]
BMK_Unigene_007316	5	2	3	3	2	3	90	81	210	127	156	182	5.3234	1.15834e-29	4.4828e-28	up	hypothetical protein BVRB_5g115390 [Beta vulgaris subsp. vulgaris]
BMK_Unigene_007317	729	677	806	672	429	599	175	248	557	259	388	393	-1.1781	0.000106436	0.000425909	down	uncharacterized protein DDB_G0275933-like [Hevea brasiliensis]
BMK_Unigene_007319	2163	1997	1390	2038	1444	2455	331	160	516	484	416	368	-2.5619	4.13623e-20	7.98847e-19	down	PREDICTED: uncharacterized protein LOC100247278 [Vitis vinifera]
BMK_Unigene_007329	29	2	30	8	13	20	46	11	101	129	70	35	1.6983	0.0105824	0.0279637	up	Cytochrome c oxidase copper chaperone 1, partial [Dichanthelium oligosanthes]
BMK_Unigene_007338	64	75	50	61	71	68	35	24	54	47	40	56	-0.8433	0.00156668	0.00503249	down	endochitinase A [Morus notabilis]
BMK_Unigene_007346	3	12	4	5	7	16	16	33	50	131	31	48	2.4937	3.06866e-05	0.000134011	up	21.7 kDa class VI heat shock protein-like isoform X1 [Hevea brasiliensis]
BMK_Unigene_007351	5	21	0	0	17	2	47	121	49	27	34	43	2.6872	0.00057359	0.00201563	up	PREDICTED: uncharacterized protein LOC100245173 [Vitis vinifera]
BMK_Unigene_007352	93	66	102	119	68	37	1435	1258	522	2167	1460	1566	3.9308	9.99252e-21	2.02827e-19	up	chitin elicitor receptor kinase 1 [Chrysanthemum boreale]
BMK_Unigene_007354	31	42	57	23	55	28	305	235	274	438	330	356	2.802	1.38046e-18	2.3754e-17	up	PREDICTED: small ubiquitin-related modifier 1 [Ricinus communis]
BMK_Unigene_007357	8	22	25	54	15	24	169	117	284	266	190	212	2.8104	7.00201e-09	4.91365e-08	up	PREDICTED: cytoplasmic tRNA 2-thiolation protein 2 [Solanum pennellii]
BMK_Unigene_007362	292	353	127	137	293	141	733	562	610	474	619	699	1.2716	1.6253e-07	9.74423e-07	up	PREDICTED: UPF0235 protein C15orf40 homolog [Ipomoea nil]
BMK_Unigene_007364	253	199	171	66	139	107	896	774	860	852	1107	720	2.312	4.40598e-18	7.28868e-17	up	PREDICTED: RNA-binding protein 39 isoform X2 [Vitis vinifera]
BMK_Unigene_007372	591	800	820	557	346	601	129	135	171	124	197	123	-2.2651	1.02816e-15	1.39966e-14	down	hypothetical protein POPTR_0005s04780g [Populus trichocarpa]
BMK_Unigene_007374	147	176	89	116	202	245	22	10	1	6	3	9	-4.4374	1.69419e-16	2.46924e-15	down	PREDICTED: uncharacterized protein LOC104234653 [Nicotiana sylvestris]
BMK_Unigene_007385	125	105	87	111	51	128	316	155	449	82	247	359	1.1839	0.00352942	0.010494	up	PREDICTED: uncharacterized protein LOC107434960 [Ziziphus jujuba]
BMK_Unigene_007386	166	385	125	169	214	106	115	16	18	5	19	22	-2.7455	6.92376e-06	3.34176e-05	down	lachrymatory-factor synthase [Cucurbita moschata]
BMK_Unigene_007387	301	355	193	110	249	276	459	370	623	516	577	495	0.8343	7.21937e-05	0.000297147	up	unnamed protein product [Coffea canephora]
BMK_Unigene_007393	331	283	275	257	179	299	517	453	666	621	754	647	0.9738	9.1417e-06	4.33427e-05	up	PREDICTED: VAMP-like protein YKT61 [Eucalyptus grandis]
BMK_Unigene_007394	2328	1957	1509	1689	1897	1549	743	800	1946	1891	1006	1234	-0.7466	0.00681159	0.0188968	down	PREDICTED: regulator of nonsense transcripts 1 homolog isoform X1 [Vitis vinifera]
BMK_Unigene_007400	1153	1232	633	761	1008	655	178	214	200	202	146	225	-2.4084	1.27933e-30	5.40669e-29	down	PREDICTED: uncharacterized protein LOC102597257 isoform X3 [Solanum tuberosum]
BMK_Unigene_007416	42	22	31	5	46	18	66	50	37	84	63	59	0.9182	0.0318151	0.0728274	up	putative ribosomal protein S15 [Helianthus annuus]
BMK_Unigene_007419	65	71	51	93	30	99	122	106	75	206	247	172	0.9963	0.0209506	0.0508335	up	Disease resistance protein [Corchorus capsularis]
BMK_Unigene_007424	477	1553	546	525	1212	828	17	12	8	3	0	7	-6.948	5.40391e-36	3.29457e-34	down	PREDICTED: phosphatidylinositol 4-phosphate 5-kinase 9 isoform X1 [Vitis vinifera]
BMK_Unigene_007426	94	383	56	11	23	157	6029	2762	128	791	1320	144	3.9266	3.69439e-06	1.85385e-05	up	hypothetical protein AQUCO_01000162v1 [Aquilegia coerulea]
BMK_Unigene_007430	1	18	1	13	43	17	120	78	124	93	105	52	2.3073	0.000331125	0.00121416	up	protein LITTLE ZIPPER 3-like [Olea europaea var. sylvestris]
BMK_Unigene_007434	5625	5653	4064	3224	3684	3760	33	53	40	2	43	66	-6.9554	3.79029e-49	5.04395e-47	down	hypothetical protein EUGRSUZ_B02942 [Eucalyptus grandis]
BMK_Unigene_007436	275	325	273	319	179	351	7	7	15	4	11	7	-5.2961	1.81697e-45	1.99585e-43	down	hypothetical protein DCAR_004564 [Daucus carota subsp. sativus]
BMK_Unigene_007446	641	535	135	35	1264	99	78	89	24	40	29	76	-3.225	5.8534e-06	2.85626e-05	down	hypothetical protein POPTR_0011s07340g [Populus trichocarpa]
BMK_Unigene_007450	79	98	37	21	36	22	0	3	0	3	0	5	-4.829	4.3668e-11	3.86267e-10	down	hypothetical protein AQUCO_01900139v1 [Aquilegia coerulea]
BMK_Unigene_007451	63	140	22	38	28	25	16	45	3	16	6	29	-1.499	0.0237121	0.0565724	down	cyclin-dependent protein kinase inhibitor SMR6-like [Olea europaea var. sylvestris]
BMK_Unigene_007452	51	35	21	36	18	14	80	94	59	139	110	87	1.5628	3.78493e-05	0.000163138	up	uncharacterized protein LOC110631683 isoform X1 [Hevea brasiliensis]
BMK_Unigene_007453	3	10	0	0	0	7	54	49	2	0	3	31	2.7774	0.0295284	0.0683378	up	antifungal protein ginkbilobin-2 [Morus notabilis]
BMK_Unigene_007455	404	527	262	280	402	209	1058	1553	974	692	1441	1282	1.578	2.44703e-08	1.61555e-07	up	protein EARLY FLOWERING 3 [Herrania umbratica]
BMK_Unigene_007456	285	179	230	346	236	207	617	664	1210	1309	1165	903	1.7553	2.65216e-08	1.74307e-07	up	PREDICTED: serine/arginine-rich SC35-like splicing factor SCL33 isoform X2 [Daucus carota subsp. sativus]
BMK_Unigene_007458	1229	4257	4103	3946	856	11279	1600	151	1592	495	2472	138	-2.2355	0.0015091	0.00486379	down	protein EXORDIUM-like 2 [Quercus suber]
BMK_Unigene_007459	14	13	3	0	17	11	178	19	144	40	69	63	2.8916	5.27574e-06	2.5935e-05	up	uncharacterized protein LOC111910339 [Lactuca sativa]
BMK_Unigene_007464	120	205	62	38	183	109	1315	1035	688	557	775	571	2.6094	6.52061e-12	6.25173e-11	up	uncharacterized protein LOC105178683 [Sesamum indicum]
BMK_Unigene_007465	785	625	546	608	769	803	1745	1469	1748	2172	1896	2276	1.2312	8.67025e-11	7.45832e-10	up	PREDICTED: signal recognition particle subunit SRP72-like [Nicotiana tabacum]
BMK_Unigene_007476	72	5	47	0	208	27	3	19	8	6	3	14	-3.048	0.00239033	0.00738903	down	Protein of unknown function wound-induced [Cynara cardunculus var. scolymus]
BMK_Unigene_007482	21	0	1	33	12	38	0	3	0	3	0	2	-3.84	0.00158475	0.00508382	down	--
BMK_Unigene_007485	524	275	321	168	197	250	165	123	142	81	257	113	-1.1411	0.00067481	0.00233987	down	ribosome-binding factor PSRP1, chloroplastic [Helianthus annuus]
BMK_Unigene_007487	1176	1893	693	1355	504	1406	7460	9919	2939	2781	4936	3648	2.0717	3.35854e-06	1.69584e-05	up	PREDICTED: trifunctional UDP-glucose 4,6-dehydratase/UDP-4-keto-6-deoxy-D-glucose 3,5-epimerase/UDP-4-keto-L-rhamnose-reductase RHM1 [Ipomoea nil]
BMK_Unigene_007490	8	13	13	25	18	15	529	421	533	432	453	628	4.773	2.18485e-46	2.5194e-44	up	PREDICTED: IST1 homolog [Nicotiana attenuata]
BMK_Unigene_007491	35	28	53	57	30	72	14	27	17	7	1	8	-2.0607	0.000639832	0.00222859	down	PREDICTED: uncharacterized protein LOC100261215 [Vitis vinifera]
BMK_Unigene_007492	1877	1125	1129	1446	1007	952	865	629	1170	820	780	981	-0.7286	0.00135565	0.00441784	down	PREDICTED: 3-ketoacyl-CoA synthase 4 [Nicotiana attenuata]
BMK_Unigene_007493	14	76	14	10	27	15	18	8	16	7	1	0	-1.8003	0.0294449	0.0681818	down	hypothetical protein CCACVL1_03441 [Corchorus capsularis]
BMK_Unigene_007502	449	277	235	208	445	240	10	9	11	8	13	17	-5.0021	1.2005e-52	1.98659e-50	down	QWRF family [Trema orientalis]
BMK_Unigene_007503	244	290	104	182	277	191	202	119	128	178	190	121	-0.655	0.0192206	0.0471478	down	unknown [Medicago truncatula]
BMK_Unigene_007505	80	62	33	22	58	65	145	59	96	104	98	85	0.6826	0.0207231	0.0503775	up	hypothetical protein CDL12_26217 [Handroanthus impetiginosus]
BMK_Unigene_007507	0	7	4	0	16	4	2	12	20	70	10	49	2.044	0.0257699	0.0608046	up	omega-hydroxypalmitate O-feruloyl transferase [Jatropha curcas]
BMK_Unigene_007508	114	62	62	63	77	117	12	9	11	7	10	19	-3.0855	2.5206e-17	3.92514e-16	down	hypothetical protein CDL12_23402 [Handroanthus impetiginosus]
BMK_Unigene_007512	119	69	110	219	35	88	13	25	20	32	16	82	-1.9852	0.000223697	0.00084731	down	hypothetical protein DCAR_002373 [Daucus carota subsp. sativus]
BMK_Unigene_007513	835	864	627	745	473	871	582	476	590	428	805	769	-0.4694	0.0383224	0.0854949	down	serine/threonine protein phosphatase 2A 57 kDa regulatory subunit B&apos; theta isoform-like [Cucurbita pepo subsp. pepo]
BMK_Unigene_007514	1056	1616	853	422	1361	784	516	365	322	348	391	283	-1.6387	5.0041e-08	3.1909e-07	down	ascorbate transporter, chloroplastic [Sesamum indicum]
BMK_Unigene_007515	9	10	5	27	4	5	137	273	11	165	16	160	3.557	7.19897e-06	3.46443e-05	up	PREDICTED: leucine-rich repeat receptor-like serine/threonine/tyrosine-protein kinase SOBIR1 [Vitis vinifera]
BMK_Unigene_007517	443	481	508	280	373	308	305	287	391	144	268	366	-0.6494	0.0211513	0.0512643	down	60S ribosomal protein L18a-like protein [Jatropha curcas]
BMK_Unigene_007520	837	485	708	465	507	725	1034	1254	2049	1449	1435	1837	1.0648	3.33621e-05	0.000145023	up	PREDICTED: probable ubiquitin-like-specific protease 2B [Juglans regia]
BMK_Unigene_007521	622	492	353	266	395	348	498	277	239	185	234	329	-0.6612	0.0208403	0.0506166	down	unnamed protein product [Coffea canephora]
BMK_Unigene_007528	62	94	12	22	57	31	507	327	393	204	300	573	2.8725	1.51216e-13	1.69017e-12	up	PREDICTED: SNF2 domain-containing protein CLASSY 1-like [Nicotiana attenuata]
BMK_Unigene_007529	274	190	137	279	170	167	288	286	461	515	483	347	0.7646	0.00854537	0.0231424	up	PREDICTED: glutathione S-transferase T3-like [Daucus carota subsp. sativus]
BMK_Unigene_007533	48	58	42	58	27	51	193	92	76	141	137	137	1.273	0.000198445	0.000758537	up	Nucleotide-diphospho-sugar transferases superfamily protein isoform 2 [Theobroma cacao]
BMK_Unigene_007534	9	13	0	11	18	11	378	315	298	327	470	359	4.8814	1.91343e-34	1.04192e-32	up	PREDICTED: cell number regulator 6-like [Populus euphratica]
BMK_Unigene_007536	172	119	79	69	120	94	462	567	698	470	558	583	2.1618	1.00022e-25	2.91977e-24	up	PREDICTED: zinc finger CCCH domain-containing protein 43 isoform X1 [Theobroma cacao]
BMK_Unigene_007537	142	121	72	76	32	91	1	4	6	9	14	0	-4.1132	8.56021e-12	8.11564e-11	down	hypothetical protein CRG98_045754 [Punica granatum]
BMK_Unigene_007539	2961	2166	2084	1703	2481	1576	1839	1733	1468	1442	1963	2391	-0.4578	0.0347472	0.078505	down	PREDICTED: probable serine/threonine protein kinase IRE4 isoform X1 [Vitis vinifera]
BMK_Unigene_007542	17	32	18	29	26	22	201	183	86	228	140	192	2.6475	1.09628e-13	1.2425e-12	up	hypothetical protein POPTR_0010s12140g [Populus trichocarpa]
BMK_Unigene_007543	988	734	663	562	748	873	616	516	404	236	310	635	-0.9398	0.00157304	0.00504943	down	PREDICTED: acetyltransferase At1g77540 [Vitis vinifera]
BMK_Unigene_007546	13	3	4	8	2	8	6	2	41	33	26	37	1.6969	0.0196019	0.0479608	up	PREDICTED: LOW QUALITY PROTEIN: WD repeat-containing protein 26-like [Capsicum annuum]
BMK_Unigene_007549	69	34	28	22	4	10	197	262	403	321	192	302	3.211	2.73676e-11	2.47405e-10	up	Phosphatidyl serine synthase [Trema orientalis]
BMK_Unigene_007553	2909	4604	1064	1629	4119	2327	154	192	215	9	231	253	-4.1964	2.58468e-14	3.10259e-13	down	plasma membrane ATPase 3 [Olea europaea var. sylvestris]
BMK_Unigene_007561	58	51	54	43	41	51	103	55	180	66	81	93	0.7192	0.0238078	0.0567795	up	hypothetical protein DCAR_010731 [Daucus carota subsp. sativus]
BMK_Unigene_007562	684	457	552	480	437	409	32	24	3	6	24	19	-4.9546	6.16542e-27	1.964e-25	down	Cytosolic endo-beta-N-acetylglucosaminidase 2 [Capsicum chinense]
BMK_Unigene_007563	489	492	370	430	376	661	850	534	1099	729	909	992	0.6355	0.00580001	0.0163667	up	PREDICTED: uncharacterized protein LOC104427349 [Eucalyptus grandis]
BMK_Unigene_007564	1633	1709	615	650	1208	785	492	573	844	209	328	637	-1.2873	0.000404526	0.00146143	down	PREDICTED: spermatogenesis-associated protein 20 isoform X3 [Vitis vinifera]
BMK_Unigene_007565	417	92	487	142	45	189	143	85	39	39	186	208	-1.1379	0.0436378	0.0954277	down	hypothetical protein B456_010G0665001, partial [Gossypium raimondii]
BMK_Unigene_007575	95	75	25	78	103	100	47	32	82	44	56	42	-0.896	0.0161562	0.0405461	down	PREDICTED: RNA-binding protein 2 isoform X2 [Theobroma cacao]
BMK_Unigene_007580	392	505	375	276	305	324	234	248	114	140	289	229	-0.9576	0.000981493	0.00328937	down	PREDICTED: forkhead box protein D1-like [Juglans regia]
BMK_Unigene_007586	8	0	1	7	2	3	4	13	103	149	37	50	3.8587	1.03705e-05	4.88055e-05	up	adenosylhomocysteinase [Arachis duranensis]
BMK_Unigene_007589	521	656	456	549	226	452	1411	1324	3557	2412	2262	1578	1.9314	3.14389e-09	2.30194e-08	up	MFP1 attachment factor 1 [Arachis ipaensis]
BMK_Unigene_007592	10	0	5	6	18	19	136	162	217	158	152	179	3.8241	2.33233e-13	2.56747e-12	up	hypothetical protein GOBAR_DD11730 [Gossypium barbadense]
BMK_Unigene_007599	302	167	112	69	152	133	121	63	64	23	121	94	-1.1134	0.00722455	0.0199092	down	PREDICTED: betaine aldehyde dehydrogenase 2, mitochondrial [Camelina sativa]
BMK_Unigene_007602	1450	1339	1631	1502	1393	1226	308	335	509	372	368	676	-1.9681	2.53757e-14	3.04747e-13	down	PREDICTED: uncharacterized protein LOC107026031 [Solanum pennellii]
BMK_Unigene_007605	200	87	66	78	148	106	16	13	8	16	6	13	-3.4256	1.02255e-18	1.77572e-17	down	protein WHAT&apos;S THIS FACTOR 1 homolog [Quercus suber]
BMK_Unigene_007607	1670	622	1963	1996	332	1359	459	403	1501	934	806	489	-1.0199	0.0259862	0.0612327	down	PREDICTED: fimbrin-1-like isoform X1 [Nicotiana sylvestris]
BMK_Unigene_007612	124	27	13	70	6	82	1638	1904	173	367	182	20	3.721	2.44409e-05	0.000108511	up	PREDICTED: protein NIM1-INTERACTING 1-like [Gossypium raimondii]
BMK_Unigene_007616	1160	1001	741	1136	1009	895	350	485	474	357	202	374	-1.5994	1.37141e-08	9.32348e-08	down	unnamed protein product, partial [Vitis vinifera]
BMK_Unigene_007621	80	49	29	24	74	46	20	18	42	26	20	25	-1.2348	0.00112756	0.00373082	down	transcription initiation factor TFIID subunit 14b-like [Durio zibethinus]
BMK_Unigene_007624	87	95	23	24	104	62	5	1	29	3	4	1	-3.5222	2.25637e-06	1.16754e-05	down	PREDICTED: pentatricopeptide repeat-containing protein At4g13650-like [Ziziphus jujuba]
BMK_Unigene_007626	47	75	5	19	15	47	66	322	38	134	147	166	2.0119	0.000666947	0.00231576	up	Endoplasmic reticulum [Macleaya cordata]
BMK_Unigene_007629	5224	5465	2980	2741	5951	3102	2911	3030	2941	2634	2748	3252	-0.742	0.000861124	0.00292112	down	PREDICTED: serine/threonine-protein kinase TOR isoform X2 [Nicotiana attenuata]
BMK_Unigene_007630	35	27	15	13	36	21	351	312	335	299	309	418	3.5742	3.1612e-45	3.42809e-43	up	unnamed protein product [Coffea canephora]
BMK_Unigene_007631	151	255	265	1675	64	392	0	0	3	39	0	0	-6.2799	4.11012e-05	0.000175919	down	retrotransposon protein, putative, Ty3-gypsy subclass [Oryza sativa Japonica Group]
BMK_Unigene_007635	394	248	588	175	176	240	249	202	198	186	193	264	-0.68	0.0454623	0.0988914	down	uncharacterized protein LOC111997914 [Quercus suber]
BMK_Unigene_007637	209	258	179	154	146	187	1293	1966	2349	1865	2171	2225	3.1997	6.19573e-54	1.10414e-51	up	PREDICTED: calpain-type cysteine protease DEK1 [Prunus mume]
BMK_Unigene_007638	57	97	18	27	147	50	13	1	1	4	16	5	-3.5506	3.84733e-07	2.19907e-06	down	hypothetical protein CISIN_1g0195451mg, partial [Citrus sinensis]
BMK_Unigene_007642	168	545	265	56	605	197	50	59	26	22	13	56	-3.2286	1.13834e-08	7.8098e-08	down	PREDICTED: protein DETOXIFICATION 40 [Vitis vinifera]
BMK_Unigene_007644	727	560	590	414	438	610	2	6	11	5	1	21	-6.4208	2.80442e-40	2.23687e-38	down	mitogen-activated protein kinase 7 [Camellia sinensis]
BMK_Unigene_007645	326	400	318	245	330	334	443	417	530	771	577	679	0.5953	0.00391728	0.0115242	up	PREDICTED: transmembrane protein 147 [Ricinus communis]
BMK_Unigene_007646	5009	6746	2994	2798	6093	5478	1960	869	351	191	257	492	-2.9788	2.6253e-08	1.72742e-07	down	UDP-glucuronate 4-epimerase 6 [Sesamum indicum]
BMK_Unigene_007656	117	145	33	31	118	61	863	486	537	453	586	546	2.6008	1.111e-14	1.37809e-13	up	PREDICTED: zinc transporter ZTP29 [Malus domestica]
BMK_Unigene_007662	440	307	277	262	305	222	646	882	1068	698	758	1072	1.3	2.72151e-09	2.00477e-08	up	WPP domain-interacting protein 2-like [Herrania umbratica]
BMK_Unigene_007664	169	178	103	102	84	227	320	212	434	374	485	449	1.1948	2.31077e-05	0.00010305	up	hypothetical protein CDL12_27473 [Handroanthus impetiginosus]
BMK_Unigene_007666	259	311	194	151	210	207	245	103	138	117	124	80	-0.9025	0.00222608	0.00692921	down	GTP-binding protein At2g22870 [Sesamum indicum]
BMK_Unigene_007669	178	195	130	89	240	111	1144	946	1563	1544	1270	1085	2.7739	4.13555e-30	1.66625e-28	up	coilin [Momordica charantia]
BMK_Unigene_007684	13	38	29	25	21	29	259	293	349	388	319	317	3.426	3.78393e-30	1.53184e-28	up	RNA recognition motif-containing protein, putative isoform 1 [Theobroma cacao]
BMK_Unigene_007686	610	553	62	104	575	107	123	74	123	96	151	116	-1.7534	0.000947448	0.00318722	down	PREDICTED: mannan endo-1,4-beta-mannosidase 2 isoform X1 [Vitis vinifera]
BMK_Unigene_007688	11	18	12	20	11	11	90	35	61	58	27	26	1.6445	0.000388791	0.00140888	up	Domain X, partial [Cynara cardunculus var. scolymus]
BMK_Unigene_007690	718	538	627	430	399	501	872	709	1767	850	1139	1290	0.824	0.00153783	0.00494794	up	unnamed protein product [Coffea canephora]
BMK_Unigene_007695	495	628	343	351	357	714	123	101	237	169	218	212	-1.666	7.02025e-10	5.49882e-09	down	PREDICTED: 2-alkenal reductase (NADP(+)-dependent) isoform X2 [Nelumbo nucifera]
BMK_Unigene_007702	9	21	6	9	56	2	781	827	558	680	644	1053	5.1657	2.74713e-20	5.38109e-19	up	hypothetical protein GOBAR_AA18911 [Gossypium barbadense]
BMK_Unigene_007710	1783	1906	1074	1134	1496	1418	24	583	22	61	33	991	-2.528	0.00194216	0.00611679	down	PREDICTED: zinc finger protein-like 1 homolog [Nicotiana tabacum]
BMK_Unigene_007723	998	975	416	134	1206	679	219	37	321	696	281	613	-1.2792	0.0331897	0.0755094	down	uncharacterized protein LOC110814475 [Carica papaya]
BMK_Unigene_007726	709	591	501	354	432	464	918	678	1091	786	860	739	0.5416	0.00193716	0.00610367	up	PREDICTED: enhancer of rudimentary homolog [Ricinus communis]
BMK_Unigene_007729	944	368	173	172	975	223	216	120	168	62	128	296	-1.77	0.000750804	0.00257811	down	unnamed protein product, partial [Vitis vinifera]
BMK_Unigene_007730	439	597	339	283	368	358	1075	1267	729	820	1077	798	1.1193	4.80411e-06	2.37586e-05	up	zinc finger CCCH domain-containing protein 44-like isoform X1 [Hevea brasiliensis]
BMK_Unigene_007731	129	96	80	48	84	181	213	213	402	483	326	317	1.4469	1.10469e-05	5.17735e-05	up	PREDICTED: protein FAM133A isoform X3 [Vitis vinifera]
BMK_Unigene_007733	152	139	119	83	69	137	1059	1003	508	534	859	668	2.5861	3.90428e-16	5.51534e-15	up	transmembrane protein 87B-like [Manihot esculenta]
BMK_Unigene_007736	400	340	230	308	351	411	14	31	46	23	20	34	-3.8225	1.09028e-35	6.5376e-34	down	PREDICTED: vacuolar protein sorting-associated protein 9A isoform X2 [Vitis vinifera]
BMK_Unigene_007743	0	0	1	13	4	5	1239	794	1040	584	997	1292	7.7131	1.92267e-30	8.01266e-29	up	probable uridine nucleosidase 2 [Hevea brasiliensis]
BMK_Unigene_007744	10	18	41	22	23	8	723	679	574	610	377	709	4.6826	6.75116e-26	1.99822e-24	up	hypothetical protein POPTR_014G057400v3 [Populus trichocarpa]
BMK_Unigene_007746	43	28	18	24	27	15	111	97	68	153	158	104	1.9887	1.75046e-09	1.31868e-08	up	unnamed protein product, partial [Vitis vinifera]
BMK_Unigene_007747	407	564	270	143	324	233	176	99	137	165	109	268	-1.2163	0.000119075	0.000472334	down	costars family protein-like [Lactuca sativa]
BMK_Unigene_007748	6570	16798	1775	2686	10026	3213	2530	2090	3021	533	1938	5189	-1.6326	0.00404558	0.0118673	down	sucrose-phosphate synthase, partial [Actinidia deliciosa]
BMK_Unigene_007752	1455	1124	402	807	302	983	314	129	89	135	246	87	-2.462	1.28409e-08	8.74969e-08	down	putative LRR receptor-like serine/threonine-protein kinase, partial [Dorcoceras hygrometricum]
BMK_Unigene_007754	29	30	25	37	33	12	119	146	39	118	93	57	1.6298	0.000369353	0.00134408	up	PREDICTED: calmodulin-binding protein 60 D-like isoform X2 [Nelumbo nucifera]
BMK_Unigene_007759	524	144	1336	4418	6	1693	64	37	85	770	185	143	-2.8938	0.00145206	0.00470074	down	PREDICTED: apoptosis-inducing factor homolog A-like [Nicotiana tabacum]
BMK_Unigene_007761	18	35	30	7	16	6	123	86	166	161	141	107	2.6172	2.08817e-10	1.72972e-09	up	PREDICTED: protein KTI12 homolog [Eucalyptus grandis]
BMK_Unigene_007765	83	65	56	27	87	59	35	48	24	23	39	14	-1.2089	0.00359719	0.0106743	down	zinc finger protein CONSTANS-LIKE 9-like [Carica papaya]
BMK_Unigene_007767	38	97	14	4	25	2	3	0	9	4	0	0	-3.6852	0.000737394	0.0025384	down	unnamed protein product [Coffea canephora]
BMK_Unigene_007768	100	224	165	45	174	166	519	280	444	303	537	469	1.3211	0.000100805	0.000405	up	L-Ala-D/L-amino acid epimerase isoform X2 [Manihot esculenta]
BMK_Unigene_007773	11	5	0	23	21	4	223	155	588	658	731	395	5.1241	2.77879e-15	3.63619e-14	up	PREDICTED: histone acetyltransferase type B catalytic subunit-like isoform X1 [Nicotiana tabacum]
BMK_Unigene_007778	655	640	606	1004	632	782	6	39	8	57	43	58	-4.5517	4.1637e-19	7.44877e-18	down	PREDICTED: dihydrolipoyllysine-residue acetyltransferase component 5 of pyruvate dehydrogenase complex, chloroplastic [Vitis vinifera]
BMK_Unigene_007779	1	2	12	8	0	14	20	49	25	16	19	50	2.0669	0.0142243	0.0362637	up	PREDICTED: protein NRT1/ PTR FAMILY 5.1-like, partial [Capsicum annuum]
BMK_Unigene_007781	49	31	21	8	5	4	514	409	948	396	1002	360	4.8289	1.89507e-20	3.76121e-19	up	PREDICTED: uncharacterized protein OsI_027940-like [Nelumbo nucifera]
BMK_Unigene_007785	78	221	61	7	95	113	39	48	8	1	16	30	-2.1212	0.00520575	0.0148709	down	PREDICTED: fasciclin-like arabinogalactan protein 4 [Eucalyptus grandis]
BMK_Unigene_007789	245	180	113	130	223	117	65	47	42	23	37	28	-2.241	1.96162e-11	1.79723e-10	down	hypothetical protein VITISV_001965 [Vitis vinifera]
BMK_Unigene_007791	285	183	117	17	219	50	88	55	49	59	44	39	-1.5444	0.0042265	0.0123504	down	transcription factor IBH1-like [Olea europaea var. sylvestris]
BMK_Unigene_007793	1162	1294	896	944	1093	877	271	199	399	327	293	238	-2.0753	6.14851e-28	2.10038e-26	down	hypothetical protein L484_001349 [Morus notabilis]
BMK_Unigene_007803	22	1	19	44	16	3	0	2	3	8	4	1	-2.7894	0.00250226	0.00770467	down	ribosomal protein L10 (mitochondrion) [Lagerstroemia indica]
BMK_Unigene_007804	332	2	7	31	7	2	2	8	0	0	4	12	-3.8647	0.00170533	0.00543539	down	PREDICTED: LRR receptor-like serine/threonine-protein kinase FLS2 [Vitis vinifera]
BMK_Unigene_007810	312	242	136	150	206	169	9	4	40	34	33	31	-3.2489	1.36753e-14	1.68521e-13	down	PREDICTED: ribosome biogenesis protein TSR3 homolog [Daucus carota subsp. sativus]
BMK_Unigene_007811	57	16	4	13	31	14	598	123	334	1092	905	207	4.4192	3.07504e-14	3.66116e-13	up	hypothetical protein AQUCO_00600233v1 [Aquilegia coerulea]
BMK_Unigene_007813	824	848	423	134	921	421	29	71	36	114	25	60	-3.5866	2.16228e-13	2.38595e-12	down	LOW QUALITY PROTEIN: Myosin_head domain-containing protein [Cephalotus follicularis]
BMK_Unigene_007814	348	294	214	120	283	151	947	552	2046	1678	977	1037	2.1322	1.7317e-11	1.59691e-10	up	PPR domain-containing protein/DYW_deaminase domain-containing protein [Cephalotus follicularis]
BMK_Unigene_007820	969	1020	147	98	1357	102	12	16	1	0	1	0	-7.0049	7.33212e-13	7.76285e-12	down	auxin-responsive protein IAA14-like [Helianthus annuus]
BMK_Unigene_007822	13	7	0	3	4	5	949	580	1265	1238	1157	1391	7.5284	7.40914e-77	3.43299e-74	up	PREDICTED: triose phosphate/phosphate translocator, non-green plastid, chloroplastic-like [Juglans regia]
BMK_Unigene_007823	2	3	11	19	13	1	139	19	201	8	64	51	2.9384	0.000436711	0.00156859	up	unnamed protein product [Coffea canephora]
BMK_Unigene_007826	831	1130	725	547	675	832	3624	3757	7050	6100	4114	4345	2.4081	6.62591e-28	2.2529e-26	up	hypothetical protein EUGRSUZ_B02456 [Eucalyptus grandis]
BMK_Unigene_007827	138	143	147	428	103	414	157	44	72	106	44	59	-1.7289	0.000482808	0.00172275	down	PREDICTED: uncharacterized protein LOC105118851 [Populus euphratica]
BMK_Unigene_007828	2	6	1	14	7	15	104	96	39	111	65	161	3.445	1.14075e-08	7.82524e-08	up	PREDICTED: 4-coumarate--CoA ligase-like 6 [Ipomoea nil]
BMK_Unigene_007831	6	1	2	6	8	0	1269	992	1188	1290	1388	1294	8.0668	4.86097e-84	3.48949e-81	up	hypothetical protein PHAVU_006G019800g [Phaseolus vulgaris]
BMK_Unigene_007833	240	239	296	185	173	274	271	1067	1468	1342	1293	1434	2.0745	6.84409e-08	4.28695e-07	up	probable 26S proteasome non-ATPase regulatory subunit 3 [Manihot esculenta]
BMK_Unigene_007835	33	41	501	193	12	252	1095	172	530	566	439	1196	1.6885	0.0477583	0.103167	up	acyl-CoA--sterol O-acyltransferase 1-like [Durio zibethinus]
BMK_Unigene_007836	516	734	327	297	573	453	106	155	520	203	211	338	-1.1718	0.0013526	0.00440844	down	putative multidrug resistance protein [Olea europaea var. sylvestris]
BMK_Unigene_007841	68	286	32	17	121	61	31	46	29	54	57	51	-1.2762	0.0265484	0.0623347	down	transcription factor BHLH089-like isoform X1 [Quercus suber]
BMK_Unigene_007843	51	8	13	2	19	43	3	3	6	2	6	0	-2.9386	0.00033991	0.00124476	down	PLAT/LH2 domain-containing lipoxygenase family protein isoform 2 [Theobroma cacao]
BMK_Unigene_007845	370	15	154	158	35	121	25	44	59	27	32	74	-1.8752	0.00171664	0.00546835	down	hypothetical protein KK1_013067 [Cajanus cajan]
BMK_Unigene_007849	125	396	40	81	111	67	3019	3274	1359	1327	2887	2559	4.0337	6.9543e-19	1.22013e-17	up	PREDICTED: uncharacterized protein slp1 isoform X2 [Vitis vinifera]
BMK_Unigene_007851	1210	1172	884	836	1005	916	729	708	577	438	470	573	-0.9644	1.20331e-05	5.6081e-05	down	PREDICTED: potassium channel KAT3 [Vitis vinifera]
BMK_Unigene_007856	893	362	546	903	120	658	4238	2042	4746	4746	4150	2577	2.5061	7.27703e-08	4.54585e-07	up	PREDICTED: UDP-arabinose 4-epimerase 1 [Nicotiana attenuata]
BMK_Unigene_007858	2547	1989	1793	2013	1482	1560	1734	1440	1426	1306	1297	1187	-0.6153	0.0036841	0.0109093	down	Serine/threonine protein kinase [Parasponia andersonii]
BMK_Unigene_007861	0	6	0	13	15	8	659	645	1086	524	780	963	6.4691	2.15215e-26	6.64793e-25	up	proteasome-associated protein ECM29 homolog isoform X3 [Manihot esculenta]
BMK_Unigene_007862	328	542	195	208	562	400	3841	3106	1794	2670	2554	2969	2.7239	6.19548e-19	1.09037e-17	up	KH domain-containing protein At4g18375 isoform X1 [Manihot esculenta]
BMK_Unigene_007863	366	517	332	501	111	384	199	167	159	146	186	208	-1.2188	0.000326293	0.00119799	down	probable apyrase 6 [Morus notabilis]
BMK_Unigene_007868	2096	443	1146	854	489	953	20	14	119	15	147	25	-4.3624	1.16847e-12	1.2107e-11	down	Coatomer beta subunit [Parasponia andersonii]
BMK_Unigene_007869	26	26	15	68	31	26	172	166	97	105	124	126	1.8428	3.84268e-05	0.000165375	up	unnamed protein product, partial [Vitis vinifera]
BMK_Unigene_007871	1537	1246	1475	1361	929	1099	606	759	584	560	587	633	-1.2115	7.75928e-07	4.2805e-06	down	PREDICTED: uncharacterized protein LOC104610239 [Nelumbo nucifera]
BMK_Unigene_007876	102	26	62	41	44	54	487	305	84	319	263	307	2.2692	4.023e-07	2.29382e-06	up	hypothetical protein CDL12_24214 [Handroanthus impetiginosus]
BMK_Unigene_007881	35	205	9	0	30	6	595	237	505	14	437	28	2.5867	0.00564118	0.0159777	up	PREDICTED: ferredoxin [Ziziphus jujuba]
BMK_Unigene_007885	1481	938	855	727	903	1035	67	128	71	234	71	136	-3.2404	1.33266e-19	2.47262e-18	down	probable LRR receptor-like serine/threonine-protein kinase At1g56140 isoform X4 [Olea europaea var. sylvestris]
BMK_Unigene_007905	1229	1650	581	256	1709	722	459	310	228	211	206	334	-2.0054	1.77013e-06	9.29144e-06	down	PREDICTED: protein HESO1-like isoform X1 [Juglans regia]
BMK_Unigene_007911	686	410	325	398	389	340	219	151	133	199	147	106	-1.5806	3.30626e-09	2.41285e-08	down	PREDICTED: probable dolichyl pyrophosphate Man9GlcNAc2 alpha-1,3-glucosyltransferase isoform X5 [Vitis vinifera]
BMK_Unigene_007914	55	109	35	20	46	25	0	0	8	0	0	7	-4.5758	3.41905e-07	1.9686e-06	down	PREDICTED: uncharacterized protein LOC107818375 isoform X1 [Nicotiana tabacum]
BMK_Unigene_007915	151	203	150	52	128	142	3358	1904	1954	2163	4853	3987	4.2692	4.70365e-39	3.4896e-37	up	cinnamyl alcohol dehydrogenase [Camellia sinensis]
BMK_Unigene_007927	529	403	396	344	362	400	6229	4816	9343	4154	6998	7293	3.7782	5.23282e-68	1.69877e-65	up	PGM_PMM_IV domain-containing protein/PGM_PMM_I domain-containing protein/PGM_PMM_II domain-containing protein/PGM_PMM_III domain-containing protein [Cephalotus follicularis]
BMK_Unigene_007929	33	96	10	26	94	31	18	20	32	30	37	7	-1.239	0.0398147	0.0883638	down	mitochondrial phosphate carrier protein 3, mitochondrial [Arabidopsis lyrata subsp. lyrata]
BMK_Unigene_007944	377	376	246	208	369	239	80	79	102	121	85	101	-1.8821	2.57829e-20	5.06203e-19	down	PREDICTED: protein N-lysine methyltransferase METTL21A-like [Nicotiana attenuata]
BMK_Unigene_007966	2	2	1	4	12	1	3158	2826	5163	3938	4121	5061	9.7471	1.48751e-93	1.64848e-90	up	fumarate hydratase 1, mitochondrial [Prunus persica]
BMK_Unigene_007984	1883	1806	854	733	1132	901	187	166	82	169	46	297	-3.1071	1.53291e-14	1.87766e-13	down	hypothetical protein CISIN_1g0411492mg, partial [Citrus sinensis]
BMK_Unigene_007988	166	1015	69	220	265	668	50	27	30	16	40	42	-3.7203	6.85301e-12	6.55317e-11	down	unnamed protein product, partial [Vitis vinifera]
BMK_Unigene_007996	2995	2625	2145	1994	2896	2642	236	141	432	291	343	214	-3.4454	1.40432e-43	1.38176e-41	down	unnamed protein product [Coffea canephora]
BMK_Unigene_008008	25	7	12	22	22	41	5	0	0	12	10	3	-2.3334	0.00387983	0.0114308	down	PREDICTED: uncharacterized protein LOC104114250 [Nicotiana tomentosiformis]
BMK_Unigene_008013	95	199	92	150	18	174	45	147	48	27	48	36	-1.1333	0.0440044	0.0961343	down	probable protein phosphatase 2C 39, partial [Olea europaea var. sylvestris]
BMK_Unigene_008025	67	44	33	6	42	28	151	171	279	314	226	203	2.4237	8.77127e-11	7.53758e-10	up	PREDICTED: putative pentatricopeptide repeat-containing protein At5g37570 isoform X1 [Nicotiana tomentosiformis]
BMK_Unigene_008026	90	6	16	189	55	31	172	181	126	267	239	271	1.4826	0.0354906	0.0799861	up	mitogen-activated protein kinase 19 [Camellia sinensis]
BMK_Unigene_008031	1423	1678	1404	1043	910	1879	360	21	469	409	741	14	-2.2699	0.00079308	0.00271214	down	RecName: Full=3-dehydroquinate synthase, chloroplastic; Flags: Precursor
BMK_Unigene_008032	71	88	35	5	77	12	29	8	13	24	19	2	-1.773	0.0127504	0.0329612	down	PREDICTED: protein GLUTAMINE DUMPER 3-like [Ziziphus jujuba]
BMK_Unigene_008034	2533	2728	1927	2153	1511	2179	4181	2687	6111	4348	3827	4707	0.7805	0.000232144	0.000876958	up	PREDICTED: uncharacterized protein LOC109175791 [Ipomoea nil]
BMK_Unigene_008036	716	2018	210	236	633	653	305	603	63	133	271	69	-1.6668	0.0109621	0.0288399	down	hypothetical protein DCAR_028354 [Daucus carota subsp. sativus]
BMK_Unigene_008040	12307	2742	11138	4324	2003	4292	376	247	694	454	636	271	-3.9669	4.82499e-17	7.31252e-16	down	PREDICTED: probable nucleoredoxin 1 [Malus domestica]
BMK_Unigene_008041	661	121	912	1716	90	514	116	105	151	161	287	150	-2.2653	0.000137677	0.000540485	down	Exo70 domain-containing protein [Cephalotus follicularis]
BMK_Unigene_008042	242	125	171	66	67	151	236	191	437	257	332	241	0.8576	0.0131055	0.0337672	up	eukaryotic translation initiation factor 4G isoform X1 [Vigna radiata var. radiata]
BMK_Unigene_008046	57	35	47	21	24	36	640	345	303	502	495	462	3.4755	7.04121e-29	2.58185e-27	up	uncharacterized protein LOC111499132 [Cucurbita maxima]
BMK_Unigene_008055	33	40	4	13	5	24	168	610	19	33	34	80	3.0339	0.000190403	0.000730263	up	PREDICTED: uncharacterized protein LOC104233082 [Nicotiana sylvestris]
BMK_Unigene_008057	1515	1566	985	1229	1213	1354	650	455	740	431	706	667	-1.3168	1.3717e-13	1.53992e-12	down	conserved oligomeric Golgi complex subunit 3 [Sesamum indicum]
BMK_Unigene_008058	146	193	80	45	113	106	325	167	228	165	196	219	0.7519	0.00560869	0.015899	up	hypothetical protein Ccrd_019600 [Cynara cardunculus var. scolymus]
BMK_Unigene_008071	40	19	80	25	52	58	13	2	7	9	14	6	-2.6822	8.8273e-07	4.82839e-06	down	uncharacterized protein At4g14450, chloroplastic [Sesamum indicum]
BMK_Unigene_008072	5	0	0	8	2	14	35	10	45	14	83	12	2.529	0.00552179	0.0156832	up	protein LIFEGUARD 2 [Citrus clementina]
BMK_Unigene_008078	146	72	114	100	84	114	2	2	22	3	11	0	-4.2589	8.94427e-11	7.67977e-10	down	protein PLANT CADMIUM RESISTANCE 10 [Citrus clementina]
BMK_Unigene_008081	89	4	71	453	0	60	15	8	57	62	5	35	-2.1676	0.0237056	0.0565624	down	uncharacterized protein LOC105177376 [Sesamum indicum]
BMK_Unigene_008088	565	547	467	646	445	439	290	252	376	434	363	443	-0.7405	0.000929492	0.0031326	down	Mitogen-activated protein kinase 10 [Morus notabilis]
BMK_Unigene_008089	110	147	138	199	50	232	571	337	575	1056	773	602	1.9542	4.41136e-06	2.19311e-05	up	PREDICTED: arginine biosynthesis bifunctional protein ArgJ, chloroplastic isoform X2 [Beta vulgaris subsp. vulgaris]
BMK_Unigene_008096	3	26	3	0	7	20	227	127	168	185	221	183	4.0605	3.20575e-12	3.1751e-11	up	PREDICTED: uncharacterized protein LOC104218267 [Nicotiana sylvestris]
BMK_Unigene_008097	35	68	11	22	192	28	20	6	22	19	38	12	-1.9374	0.00566641	0.0160396	down	PREDICTED: protein ELF4-LIKE 3 [Ziziphus jujuba]
BMK_Unigene_008099	1418	695	821	1803	447	1197	83	39	78	199	108	148	-3.4913	2.1789e-15	2.87706e-14	down	PREDICTED: phospholipase D beta 1-like [Ipomoea nil]
BMK_Unigene_008102	22	6	0	8	23	11	118	31	97	35	64	52	2.2514	0.000139901	0.000548625	up	hypothetical protein CISIN_1g005579mg [Citrus sinensis]
BMK_Unigene_008103	5170	3419	4240	3774	3286	4380	1078	581	713	646	914	508	-2.6426	7.76319e-24	1.98035e-22	down	LON 2 protease [Vaccinium corymbosum]
BMK_Unigene_008108	509	353	199	344	324	374	850	706	1149	993	926	1223	1.2682	5.38773e-10	4.27996e-09	up	protein MEI2-like 4 [Sesamum indicum]
BMK_Unigene_008111	867	811	744	157	517	267	157	46	238	72	175	134	-2.248	5.15713e-07	2.90408e-06	down	PREDICTED: protein STRICTOSIDINE SYNTHASE-LIKE 2-like [Ipomoea nil]
BMK_Unigene_008112	161	93	67	58	116	104	425	243	568	353	476	360	1.7995	6.13497e-13	6.5402e-12	up	actin-related protein 2/3 complex subunit 3 [Olea europaea var. sylvestris]
BMK_Unigene_008113	1035	1177	771	726	1443	815	219	395	577	504	323	862	-1.2984	8.86374e-05	0.000359573	down	PREDICTED: NAD(P)H:quinone oxidoreductase [Nicotiana tomentosiformis]
BMK_Unigene_008121	65	373	83	22	133	59	23	8	10	1	5	9	-3.8696	1.01988e-08	7.02922e-08	down	putative glutathione S-transferase [Cyclamen persicum x Cyclamen purpurascens]
BMK_Unigene_008122	145	74	178	303	143	124	417	827	61	1211	430	1161	1.8864	0.00285395	0.00866917	up	GPCR kinase [Trema orientalis]
BMK_Unigene_008127	157	283	68	107	217	120	87	70	17	75	82	87	-1.3596	0.00159725	0.00512068	down	PREDICTED: uncharacterized protein LOC100241254 [Vitis vinifera]
BMK_Unigene_008135	3	12	11	26	7	9	1	4	0	2	3	7	-2.1967	0.00603041	0.016967	down	PREDICTED: vitellogenin-like [Nelumbo nucifera]
BMK_Unigene_008136	94	54	98	110	82	139	0	6	35	21	23	20	-2.7458	4.63462e-06	2.29672e-05	down	hypothetical protein BVC80_645g105 [Macleaya cordata]
BMK_Unigene_008141	1190	1082	911	1413	771	975	319	335	464	239	249	332	-1.9113	1.59795e-12	1.6351e-11	down	PREDICTED: uncharacterized protein LOC100258847 isoform X3 [Vitis vinifera]
BMK_Unigene_008145	1014	553	480	716	404	618	1690	1442	2390	1279	2539	2069	1.3989	3.53947e-07	2.03377e-06	up	serine/threonine-protein phosphatase BSL1-like isoform X2 [Durio zibethinus]
BMK_Unigene_008149	81	80	35	53	75	90	174	144	156	226	131	142	1.0362	7.51051e-05	0.000308333	up	hypothetical protein POPTR_012G110800v3 [Populus trichocarpa]
BMK_Unigene_008153	17	32	49	21	23	20	10	17	6	3	11	14	-1.5797	0.00247919	0.00763824	down	extensin [Manihot esculenta]
BMK_Unigene_008154	314	557	397	414	234	476	1210	1623	731	563	683	375	0.9884	0.0241293	0.0573907	up	PREDICTED: trihelix transcription factor ASIL1 isoform X4 [Vitis vinifera]
BMK_Unigene_008156	681	442	456	174	595	264	242	306	80	53	124	403	-1.2856	0.0131605	0.0338972	down	PREDICTED: uncharacterized protein LOC100266480 [Vitis vinifera]
BMK_Unigene_008158	38	52	9	47	37	37	1014	1143	924	581	559	590	4.2819	2.28586e-28	8.05709e-27	up	PREDICTED: neutral/alkaline invertase 3, chloroplastic [Cicer arietinum]
BMK_Unigene_008160	172	402	111	28	41	67	138	619	211	2240	74	1280	2.3849	0.0012158	0.00399683	up	hypothetical protein CDL12_20286 [Handroanthus impetiginosus]
BMK_Unigene_008162	697	1122	445	199	628	309	3926	1434	1758	1283	4162	1349	1.8694	5.70566e-06	2.7887e-05	up	PREDICTED: universal stress protein PHOS34 [Ipomoea nil]
BMK_Unigene_008165	512	435	311	242	478	485	54	49	99	66	72	109	-2.6924	7.43929e-27	2.35507e-25	down	WRKY5 transcription factor [Panax ginseng]
BMK_Unigene_008167	526	466	240	255	389	300	234	164	139	215	211	189	-1.0926	4.93887e-07	2.78827e-06	down	PREDICTED: uncharacterized protein LOC108216823 [Daucus carota subsp. sativus]
BMK_Unigene_008171	1350	1118	2145	918	738	1595	87	22	36	135	82	54	-4.4399	1.25476e-23	3.15037e-22	down	monothiol glutaredoxin-S17 [Sesamum indicum]
BMK_Unigene_008172	1010	1075	697	660	825	964	586	658	1012	458	770	970	-0.4451	0.0462126	0.100274	down	PREDICTED: E3 ubiquitin protein ligase RIN2 [Vitis vinifera]
BMK_Unigene_008175	105	151	77	51	140	77	394	269	440	403	501	460	1.8158	2.24874e-14	2.71211e-13	up	PREDICTED: signal peptide peptidase-like 1 [Prunus mume]
BMK_Unigene_008180	1525	1241	1100	352	1187	824	679	878	558	503	510	641	-0.888	0.00783785	0.0214106	down	uncharacterized protein LOC105167904 isoform X2 [Sesamum indicum]
BMK_Unigene_008184	657	675	297	201	694	291	352	208	359	267	200	315	-0.9387	0.00406651	0.0119219	down	PREDICTED: uncharacterized protein LOC109169981 isoform X2 [Ipomoea nil]
BMK_Unigene_008187	286	183	160	169	261	189	533	720	909	970	718	653	1.64	1.98012e-12	2.00522e-11	up	PREDICTED: ribosome biogenesis regulatory protein homolog [Vitis vinifera]
BMK_Unigene_008188	876	950	624	648	736	727	272	241	371	543	490	395	-1.1862	6.25335e-08	3.93969e-07	down	PREDICTED: phosphatidyl-N-methylethanolamine N-methyltransferase [Nicotiana attenuata]
BMK_Unigene_008194	4561	3370	5677	3626	2081	4608	3444	1965	2014	1395	2000	2355	-1.0469	0.00103659	0.00345494	down	glucose-6-phosphate isomerase, cytosolic [Sesamum indicum]
BMK_Unigene_008207	124	113	77	67	93	94	369	190	663	996	671	491	2.3548	2.66556e-12	2.66389e-11	up	PREDICTED: pentatricopeptide repeat-containing protein At1g63330 [Vitis vinifera]
BMK_Unigene_008210	85	67	82	79	65	60	44	154	408	106	139	235	1.0552	0.0196196	0.0479993	up	PREDICTED: cyclin-dependent kinases regulatory subunit 1 [Musa acuminata subsp. malaccensis]
BMK_Unigene_008212	54	80	33	4	165	44	21	15	11	14	23	14	-2.2107	0.000572395	0.00201185	down	PREDICTED: LRR receptor-like serine/threonine-protein kinase GSO1 [Nicotiana tomentosiformis]
BMK_Unigene_008213	7	12	0	5	5	0	407	279	521	288	579	290	6.1973	2.82897e-35	1.64409e-33	up	uncharacterized protein LOC111292767 isoform X2 [Durio zibethinus]
BMK_Unigene_008216	933	881	392	877	461	702	4268	6594	310	736	1161	355	1.6195	0.020862	0.0506595	up	PREDICTED: splicing factor 3A subunit 2 [Vitis vinifera]
BMK_Unigene_008218	53	116	1	28	28	50	407	488	235	373	267	435	2.8937	1.39215e-07	8.41899e-07	up	PREDICTED: pentatricopeptide repeat-containing protein At2g31400, chloroplastic [Daucus carota subsp. sativus]
BMK_Unigene_008220	686	239	371	343	290	297	274	220	191	232	213	304	-0.8097	0.00431785	0.0125856	down	E3 ubiquitin-protein ligase At3g02290 [Morus notabilis]
BMK_Unigene_008223	29	41	11	9	19	16	2360	1416	2132	1072	1938	1975	6.2801	9.37787e-89	7.96619e-86	up	PREDICTED: K(+) efflux antiporter 2, chloroplastic-like [Juglans regia]
BMK_Unigene_008226	6	14	6	9	17	11	38	64	11	78	34	81	2.0682	0.000110095	0.000439484	up	39s ribosomal protein l41-a, mitochondrial [Quercus suber]
BMK_Unigene_008228	5	26	9	43	8	32	30	2	355	61	65	31	1.8088	0.0372917	0.0834622	up	hypothetical protein CFOL_v3_06220 [Cephalotus follicularis]
BMK_Unigene_008230	3637	6174	2869	1767	2953	3169	1892	1047	1477	684	1258	1939	-1.4971	5.93919e-07	3.31881e-06	down	PREDICTED: cellulose synthase A catalytic subunit 3 [UDP-forming] [Ziziphus jujuba]
BMK_Unigene_008234	13	29	3	5	12	17	139	70	180	309	114	133	3.3979	3.02358e-13	3.29497e-12	up	ubiquitin-conjugating enzyme e2 19 [Quercus suber]
BMK_Unigene_008237	47	132	18	34	18	52	354	227	318	341	343	404	2.5846	4.03508e-11	3.58293e-10	up	serine/threonine-protein kinase STY13 isoform X1 [Morus notabilis]
BMK_Unigene_008243	46	46	18	17	38	31	17	5	18	0	4	2	-2.3065	0.000851256	0.0028913	down	PREDICTED: uncharacterized protein LOC104596560 [Nelumbo nucifera]
BMK_Unigene_008245	847	735	623	653	544	815	1126	810	1763	1362	1613	1314	0.7067	0.00100353	0.00335486	up	serine/threonine protein phosphatase 2A regulatory subunit B&apos;&apos;beta [Sesamum indicum]
BMK_Unigene_008248	408	233	292	790	343	355	11	54	43	63	28	74	-3.3688	2.40241e-12	2.41035e-11	down	WD40 repeat [Macleaya cordata]
BMK_Unigene_008249	44	190	10	23	174	24	3	9	7	4	6	13	-3.6932	3.30627e-07	1.9067e-06	down	protein LURP-one-related 17-like [Hevea brasiliensis]
BMK_Unigene_008257	2659	1775	1301	1290	1335	1794	388	948	228	508	393	754	-1.7868	1.92888e-06	1.00739e-05	down	probable LRR receptor-like serine/threonine-protein kinase At1g56140 isoform X3 [Olea europaea var. sylvestris]
BMK_Unigene_008259	6	13	13	33	10	28	174	106	104	301	68	201	2.9799	5.84985e-08	3.69874e-07	up	PREDICTED: probable inactive receptor kinase At1g48480 [Daucus carota subsp. sativus]
BMK_Unigene_008266	62	77	12	14	76	119	1062	34	45	111	360	24	1.9979	0.0138378	0.035381	up	protein C2-DOMAIN ABA-RELATED 4-like [Carica papaya]
BMK_Unigene_008268	1182	596	359	1307	369	574	2441	1911	3833	1898	4256	4182	1.8767	5.17314e-06	2.54773e-05	up	uncharacterized protein LOC110641587 [Hevea brasiliensis]
BMK_Unigene_008270	385	240	242	315	190	216	318	286	549	326	539	1074	0.7362	0.0441351	0.0963663	up	Zinc finger, RING/FYVE/PHD-type [Corchorus olitorius]
BMK_Unigene_008277	215	159	191	194	264	182	110	118	144	65	200	152	-0.8479	0.00577055	0.0163007	down	hypothetical protein Ccrd_015888 [Cynara cardunculus var. scolymus]
BMK_Unigene_008281	464	357	214	168	586	200	152	191	46	94	129	135	-1.5876	0.00021649	0.00082166	down	7-hydroxymethyl chlorophyll a reductase [Camellia sinensis]
BMK_Unigene_008286	479	303	254	126	214	201	862	614	440	317	438	368	0.8113	0.0163232	0.0409109	up	hypothetical protein CISIN_1g0014661mg, partial [Citrus sinensis]
BMK_Unigene_008287	1452	681	657	635	565	635	58	131	78	9	15	201	-3.3968	1.22012e-08	8.33159e-08	down	PREDICTED: post-GPI attachment to proteins factor 3 isoform X2 [Vitis vinifera]
BMK_Unigene_008288	1101	591	828	2628	438	930	503	444	624	752	656	922	-0.9597	0.0205388	0.0499748	down	pyruvate dehydrogenase E1 component subunit alpha-3, chloroplastic [Prunus avium]
BMK_Unigene_008290	10	3	36	310	5	12	3	0	1708	3162	172	2905	4.0857	0.0147986	0.0375326	up	hypothetical protein CDL12_16028 [Handroanthus impetiginosus]
BMK_Unigene_008293	280	526	247	307	187	350	1000	736	1225	990	837	1278	1.4837	3.25545e-09	2.37815e-08	up	PREDICTED: uncharacterized protein LOC108997240 [Juglans regia]
BMK_Unigene_008295	0	19	509712	0	231	226118	4	183	0	18	82	12	-11.359	1.80409e-06	9.45901e-06	down	--
BMK_Unigene_008296	157	122	27	10	293	16	25	22	48	16	24	27	-2.2306	0.00216798	0.00676157	down	PREDICTED: protein PHYTOCHROME KINASE SUBSTRATE 4 [Ricinus communis]
BMK_Unigene_008297	8178	17958	7021	8146	5983	9308	717	2406	12782	356	734	4127	-1.6928	0.0144901	0.0368583	down	hypothetical protein JCGZ_12107 [Jatropha curcas]
BMK_Unigene_008299	253	209	151	230	188	193	55	52	49	48	131	134	-1.5974	2.41229e-06	1.2433e-05	down	PREDICTED: digalactosyldiacylglycerol synthase 2, chloroplastic [Solanum tuberosum]
BMK_Unigene_008301	352	309	137	936	98	412	76	78	20	47	47	60	-2.9209	9.73664e-08	5.99851e-07	down	PREDICTED: probable receptor-like protein kinase At5g47070 [Juglans regia]
BMK_Unigene_008306	145793	118645	16452	1509	192497	8136	63324	4773	23805	1113	25085	8469	-2.1588	0.0257938	0.0608496	down	kirola-like [Olea europaea var. sylvestris]
BMK_Unigene_008307	252	583	169	94	403	240	26	67	6	3	9	70	-3.405	1.05814e-06	5.72396e-06	down	PREDICTED: GTP-binding protein At2g22870 [Nelumbo nucifera]
BMK_Unigene_008310	202	158	130	165	124	140	1196	1080	2376	1905	1556	1731	3.2062	2.22755e-43	2.1462e-41	up	PREDICTED: TATA-binding protein-associated factor BTAF1 isoform X1 [Vitis vinifera]
BMK_Unigene_008314	439	386	251	125	131	291	1431	1103	928	1221	1373	1308	2.0422	2.05019e-12	2.0733e-11	up	PREDICTED: uncharacterized protein LOC104882192 [Vitis vinifera]
BMK_Unigene_008320	65	22	55	26	5	3	0	99	1286	86	77	534	3.2996	0.00145785	0.0047168	up	pathogenesis-related protein [Vitis quinquangularis]
BMK_Unigene_008322	41	53	8	13	317	4	21	15	15	7	12	17	-2.6868	0.00289869	0.00879197	down	PREDICTED: uncharacterized protein LOC100246942 [Vitis vinifera]
BMK_Unigene_008327	1021	705	1236	1509	354	1107	1120	1386	3536	2925	2204	2956	1.0216	0.0264921	0.0622492	up	Copper-transporting ATPase RAN1 [Capsicum chinense]
BMK_Unigene_008334	23	17	16	9	40	19	2	5	9	0	10	5	-2.2708	0.000661867	0.00229874	down	uncharacterized protein LOC112019442 [Quercus suber]
BMK_Unigene_008335	9	12	3	5	5	2	41	24	85	52	127	88	3.341	5.40396e-11	4.74142e-10	up	PREDICTED: transmembrane protein 258-like [Nicotiana sylvestris]
BMK_Unigene_008336	752	591	516	724	580	541	126	130	81	110	56	140	-2.7083	1.21066e-19	2.25448e-18	down	PREDICTED: protein EARLY RESPONSIVE TO DEHYDRATION 15 [Vitis vinifera]
BMK_Unigene_008337	271	323	470	352	214	360	49	78	149	63	132	51	-2.1533	1.51575e-08	1.02555e-07	down	PREDICTED: G-type lectin S-receptor-like serine/threonine-protein kinase SD1-29 isoform X2 [Nicotiana sylvestris]
BMK_Unigene_008342	193	108	147	182	131	171	16	5	29	26	14	27	-3.249	2.11505e-17	3.31081e-16	down	PREDICTED: F-box protein At3g07870-like isoform X1 [Nicotiana attenuata]
BMK_Unigene_008343	205	194	146	86	163	93	591	571	695	694	920	717	2.0479	2.39852e-20	4.71454e-19	up	THO complex, subunit THOC1 [Cynara cardunculus var. scolymus]
BMK_Unigene_008349	3588	2227	3083	3107	1250	2747	1785	1561	993	1094	1483	1309	-1.1188	0.000351035	0.00128237	down	hypothetical protein CQW23_07854 [Capsicum baccatum]
BMK_Unigene_008351	87	36	4	2	24	30	16	2	0	7	18	3	-2.0953	0.024045	0.0572167	down	uncharacterized protein LOC110628476 [Manihot esculenta]
BMK_Unigene_008354	359	367	299	283	159	277	8681	7976	3743	2916	5361	6601	4.1972	9.53736e-33	4.62953e-31	up	PREDICTED: transcription factor bHLH143 [Vitis vinifera]
BMK_Unigene_008355	1	63	13	42	44	30	13	15	3	3	5	0	-2.4378	0.00566648	0.0160396	down	PREDICTED: uncharacterized protein LOC104880828 [Vitis vinifera]
BMK_Unigene_008359	876	901	532	1293	922	717	2361	2238	3388	4382	3233	2904	1.599	5.30624e-08	3.3768e-07	up	unnamed protein product [Coffea canephora]
BMK_Unigene_008361	47	33	42	41	45	66	123	6	250	244	36	134	1.2499	0.0444198	0.096919	up	uncharacterized protein LOC111407058 [Olea europaea var. sylvestris]
BMK_Unigene_008364	323	445	125	174	292	312	703	505	1563	1047	757	1034	1.523	1.14597e-07	6.99996e-07	up	peptidyl-prolyl cis-trans isomerase CYP19-3 [Manihot esculenta]
BMK_Unigene_008365	85	175	74	27	24	67	18	25	44	57	27	17	-1.4026	0.00472961	0.0136508	down	PREDICTED: receptor-like protein 51 isoform X1 [Nicotiana tomentosiformis]
BMK_Unigene_008367	2	0	22	3	2	20	41	16	97	38	52	16	2.1063	0.0193426	0.0474151	up	transcription factor BOA isoform X2 [Jatropha curcas]
BMK_Unigene_008368	143	290	127	35	170	260	38	9	4	22	27	19	-3.2902	8.54869e-10	6.63484e-09	down	uncharacterized protein LOC111398559 [Olea europaea var. sylvestris]
BMK_Unigene_008370	2259	735	2068	3897	189	2910	385	534	146	676	274	421	-2.4602	2.85258e-05	0.000125272	down	LEAF RUST 10 DISEASE-RESISTANCE LOCUS RECEPTOR-LIKE PROTEIN KINASE-like 1.3 [Olea europaea var. sylvestris]
BMK_Unigene_008371	74	103	49	19	68	35	1	0	18	9	4	11	-3.2995	7.26959e-07	4.02473e-06	down	replication factor C subunit 5-like [Sesamum indicum]
BMK_Unigene_008378	412	389	260	333	389	268	11	6	46	12	26	30	-4.2444	3.70724e-27	1.20045e-25	down	Protein of unknown function DUF3769 [Macleaya cordata]
BMK_Unigene_008382	79	95	46	170	94	217	1	3	42	47	62	120	-1.6486	0.0265463	0.0623347	down	hypothetical protein [Camellia sinensis]
BMK_Unigene_008386	1274	1148	808	1652	649	1021	8	9	17	5	23	23	-6.4879	5.59621e-57	1.11854e-54	down	RNB domain-containing protein [Cephalotus follicularis]
BMK_Unigene_008389	70	102	24	30	23	45	828	1081	362	320	434	233	3.4114	1.16016e-12	1.20282e-11	up	vacuolar protein-sorting-associated protein 37 homolog 1-like isoform X2 [Hevea brasiliensis]
BMK_Unigene_008390	109	257	68	159	7	264	613	209	817	3707	542	1404	2.9015	5.22863e-05	0.000220133	up	PREDICTED: calmodulin-like protein 1 [Gossypium arboreum]
BMK_Unigene_008402	3	17	8	1	14	5	267	294	331	198	307	334	4.9449	4.59776e-30	1.84229e-28	up	PREDICTED: geranylgeranyl transferase type-2 subunit beta-like [Nicotiana tabacum]
BMK_Unigene_008403	617	689	548	381	498	511	1723	919	2208	1719	2173	1659	1.4655	1.82144e-12	1.85152e-11	up	SEC12-like protein 2 [Olea europaea var. sylvestris]
BMK_Unigene_008408	9	0	0	11	2	3	110	120	56	52	18	43	3.8739	2.25148e-06	1.16537e-05	up	uncharacterized protein LOC105167560 [Sesamum indicum]
BMK_Unigene_008412	7	5	5	9	12	17	50	71	114	101	84	133	3.0613	5.39314e-13	5.77232e-12	up	unnamed protein product, partial [Vitis vinifera]
BMK_Unigene_008416	1961	1615	1015	1005	1311	1159	1084	765	1193	825	1121	1274	-0.5641	0.00046055	0.00164852	down	probable serine incorporator [Sesamum indicum]
BMK_Unigene_008417	8	2	4	7	12	11	625	582	832	499	850	631	6.2502	1.77284e-63	4.80629e-61	up	PREDICTED: serine/threonine protein phosphatase 2A 57 kDa regulatory subunit B&apos; beta isoform-like [Ipomoea nil]
BMK_Unigene_008418	508	612	522	902	404	489	296	57	159	156	250	53	-2.03	4.06099e-06	2.02843e-05	down	somatic embryogenesis receptor kinase [Carica papaya]
BMK_Unigene_008420	30	986	188	343	421	1418	65	132	73	480	89	407	-1.6668	0.02371	0.0565702	down	4-coumarate:CoA ligase [Petunia x hybrida]
BMK_Unigene_008421	29	221	20	12	137	15	5	31	8	7	3	10	-2.8647	0.000527258	0.00186504	down	PREDICTED: uncharacterized protein LOC104612311 [Nelumbo nucifera]
BMK_Unigene_008424	711	565	611	875	366	575	45	48	130	95	63	81	-3.2301	2.88406e-21	6.08611e-20	down	protein BLISTER-like isoform X1 [Manihot esculenta]
BMK_Unigene_008425	139	165	79	89	117	81	357	401	446	461	498	406	1.7551	2.20104e-20	4.34143e-19	up	PREDICTED: small G protein signaling modulator 1-like isoform X2 [Juglans regia]
BMK_Unigene_008431	1380	1297	422	197	721	299	140	113	236	191	93	148	-2.3918	1.43485e-08	9.72748e-08	down	PREDICTED: 26.5 kDa heat shock protein, mitochondrial [Vitis vinifera]
BMK_Unigene_008432	725	677	859	571	213	455	374	187	374	196	273	358	-1.1808	0.000512926	0.00181914	down	PREDICTED: actin-depolymerizing factor [Juglans regia]
BMK_Unigene_008435	433	74	318	421	67	427	889	302	1265	1369	2599	1402	1.9486	0.00111528	0.00369355	up	LOW QUALITY PROTEIN: oligopeptide transporter 4-like [Carica papaya]
BMK_Unigene_008440	65	104	30	64	83	53	232	244	249	141	266	380	1.7137	1.71954e-08	1.15607e-07	up	LRR repeats and ubiquitin-like domain-containing protein At2g30105 [Manihot esculenta]
BMK_Unigene_008445	154	181	209	63	105	115	863	732	735	628	1044	848	2.3703	4.13817e-15	5.33015e-14	up	PREDICTED: heat shock 70 kDa protein 15-like [Nicotiana attenuata]
BMK_Unigene_008454	126	147	74	113	107	175	25	69	35	19	45	35	-1.8602	1.38757e-06	7.37762e-06	down	Sm-like protein Lsm7/snRNP-G [Parasponia andersonii]
BMK_Unigene_008458	12	67	4	8	23	16	104	40	58	310	33	245	2.4264	0.000178912	0.000689304	up	hypothetical protein AQUCO_00700754v1 [Aquilegia coerulea]
BMK_Unigene_008459	2	10	0	9	1	5	99	144	57	41	72	149	4.2471	1.01455e-10	8.66593e-10	up	uncharacterized protein LOC110417818 [Herrania umbratica]
BMK_Unigene_008460	64	162	11	0	147	9	8	28	3	12	10	26	-2.3307	0.018599	0.0458171	down	PREDICTED: mitochondrial phosphate carrier protein 3, mitochondrial isoform X2 [Lupinus angustifolius]
BMK_Unigene_008464	176	125	75	71	60	87	29	65	20	87	21	23	-1.3723	0.00347642	0.0103533	down	PREDICTED: cytochrome b561 and DOMON domain-containing protein At3g07570 [Daucus carota subsp. sativus]
BMK_Unigene_008470	131	184	101	155	153	144	652	573	858	747	860	808	2.1542	5.26077e-28	1.80681e-26	up	PREDICTED: probable magnesium transporter NIPA6 [Solanum lycopersicum]
BMK_Unigene_008471	436	345	337	432	214	386	183	160	392	291	302	362	-0.5684	0.0390241	0.0868475	down	probable WRKY transcription factor 21 [Quercus suber]
BMK_Unigene_008473	326	437	273	245	286	318	203	237	177	221	207	216	-0.7559	0.000112261	0.000447325	down	PREDICTED: protein COFACTOR ASSEMBLY OF COMPLEX C SUBUNIT B CCB4, chloroplastic isoform X1 [Solanum tuberosum]
BMK_Unigene_008477	5	3	11	4	0	10	28	10	336	203	15	43	3.972	1.12513e-05	5.26688e-05	up	hypothetical protein [Diospyros kaki]
BMK_Unigene_008478	36	19	31	14	8	11	102	105	168	43	168	75	2.3133	1.08155e-06	5.84008e-06	up	uncharacterized protein LOC112032038 [Quercus suber]
BMK_Unigene_008480	2454	2363	1381	1347	1001	1692	876	592	941	408	1210	651	-1.3015	5.1606e-06	2.5418e-05	down	probable plastidic glucose transporter 2 [Quercus suber]
BMK_Unigene_008501	662	911	386	224	865	442	119	138	154	83	104	154	-2.4209	9.48238e-14	1.07975e-12	down	hypothetical protein DCAR_019630 [Daucus carota subsp. sativus]
BMK_Unigene_008507	35	77	51	74	40	21	24	10	0	0	34	29	-1.8132	0.0257657	0.0607975	down	hypothetical protein CFP56_20098 [Quercus suber]
BMK_Unigene_008516	1538	1572	876	933	1428	949	662	539	555	160	562	1498	-1.0959	0.00768218	0.0210327	down	peptide methionine sulfoxide reductase-like [Lactuca sativa]
BMK_Unigene_008520	856	473	743	624	408	620	476	279	428	549	621	429	-0.619	0.0195974	0.0479521	down	1-acyl-sn-glycerol-3-phosphate acyltransferase 1, chloroplastic-like [Quercus suber]
BMK_Unigene_008523	852	783	563	589	716	741	2	6	9	10	2	6	-7.1283	6.19133e-95	7.3386e-92	down	66 kDa stress protein [Morus notabilis]
BMK_Unigene_008535	100	132	62	115	89	111	235	217	361	278	303	245	1.2199	1.44405e-07	8.71524e-07	up	hypothetical protein Ccrd_001132, partial [Cynara cardunculus var. scolymus]
BMK_Unigene_008536	502	262	251	146	188	308	705	499	1139	704	418	784	1.1651	9.79805e-05	0.000394585	up	beta-galactosidase [Camellia sinensis]
BMK_Unigene_008541	181	347	224	284	300	56	167	129	153	65	164	159	-0.951	0.02176	0.052495	down	photosynthetic NDH subunit of subcomplex B 5, chloroplastic [Olea europaea var. sylvestris]
BMK_Unigene_008542	1462	3249	606	364	1468	1007	326	459	390	154	241	215	-2.3267	3.64045e-07	2.08831e-06	down	adh_short domain-containing protein [Cephalotus follicularis]
BMK_Unigene_008548	56	44	36	46	21	54	318	546	23	55	60	19	1.9581	0.0111941	0.0293715	up	PREDICTED: cellulose synthase-like protein D3 [Ziziphus jujuba]
BMK_Unigene_008559	6	10	13	5	12	1	38	29	22	37	5	13	1.4156	0.031182	0.0716217	up	hypothetical protein CISIN_1g043124mg [Citrus sinensis]
BMK_Unigene_008561	63	77	44	45	77	80	97	86	81	127	109	125	0.4831	0.0437718	0.0956836	up	hypothetical protein CISIN_1g033257mg [Citrus sinensis]
BMK_Unigene_008570	996	843	816	1373	631	974	1451	1660	4965	4942	3476	2888	1.5504	5.07115e-05	0.000213909	up	PREDICTED: uncharacterized protein At3g06530 [Vitis vinifera]
BMK_Unigene_008571	5548	3347	3718	3508	2778	3574	522	335	857	290	526	553	-3.0834	9.61649e-29	3.49346e-27	down	hypothetical protein AQUCO_02400044v1 [Aquilegia coerulea]
BMK_Unigene_008574	35	22	80	60	29	34	121	142	80	121	138	119	1.2736	0.00759422	0.0208188	up	PP2C family protein [Hevea brasiliensis]
BMK_Unigene_008581	439	312	208	203	217	206	36	32	24	9	10	11	-3.8309	8.19823e-21	1.67675e-19	down	PREDICTED: TBC1 domain family member 13 [Ricinus communis]
BMK_Unigene_008584	53	110	3	44	109	32	110	417	183	262	73	189	1.6496	0.00474747	0.0136969	up	lachrymatory-factor synthase-like [Sesamum indicum]
BMK_Unigene_008585	109	164	84	125	124	124	1617	1288	2199	1459	2102	2162	3.6678	2.87476e-69	9.76804e-67	up	protein CHROMATIN REMODELING 20 isoform X1 [Hevea brasiliensis]
BMK_Unigene_008586	669	97	1206	168	51	1277	47	4	29	45	21	17	-4.6295	3.0713e-10	2.501e-09	down	PREDICTED: receptor like protein 30-like [Theobroma cacao]
BMK_Unigene_008588	360	164	105	214	219	163	1864	1562	1982	1461	2035	2292	2.9941	2.12724e-30	8.81473e-29	up	PREDICTED: brefeldin A-inhibited guanine nucleotide-exchange protein 1 [Ipomoea nil]
BMK_Unigene_008590	37	1238	42	27	35	597	95	42	225	8	66	34	-2.2458	0.0170737	0.042549	down	UGT85A1 [Arabidopsis thaliana]
BMK_Unigene_008592	7	20	0	0	53	7	183	77	187	241	300	421	3.6617	3.45478e-06	1.74064e-05	up	PREDICTED: mitochondrial intermembrane space import and assembly protein 40 homolog [Vitis vinifera]
BMK_Unigene_008596	892	867	490	175	1007	332	25	36	23	20	9	11	-5.0831	3.91754e-27	1.26694e-25	down	laccase 1 [Daucus carota subsp. carota]
BMK_Unigene_008604	932	1082	670	467	1363	791	746	640	533	476	651	552	-0.7679	0.00588547	0.0165913	down	PREDICTED: probable LRR receptor-like serine/threonine-protein kinase RKF3 [Ziziphus jujuba]
BMK_Unigene_008606	127	141	107	120	110	131	367	437	390	404	286	425	1.4587	4.91848e-11	4.33411e-10	up	Glycosyl transferase, family 31, partial [Corchorus capsularis]
BMK_Unigene_008609	47	50	34	79	114	161	25	10	9	21	7	21	-2.6397	4.0578e-07	2.31314e-06	down	PREDICTED: probable protein phosphatase 2C 27 isoform X2 [Nicotiana tomentosiformis]
BMK_Unigene_008620	329	308	324	143	241	250	212	256	216	149	141	178	-0.6419	0.0250114	0.0591847	down	Leucine-rich acidic nuclear protein [Handroanthus impetiginosus]
BMK_Unigene_008625	1475	2556	843	271	2120	776	341	260	119	72	166	204	-2.9529	4.27715e-09	3.08299e-08	down	starch synthase 3 [Camellia sinensis]
BMK_Unigene_008630	787	742	373	383	617	441	1798	1661	3421	3534	2723	2385	2.0091	1.25497e-18	2.16678e-17	up	unnamed protein product, partial [Vitis vinifera]
BMK_Unigene_008645	832	1132	742	1037	567	921	2604	1553	1778	2261	1742	2874	1.0982	3.8106e-05	0.000164133	up	uncharacterized protein LOC110811117 [Carica papaya]
BMK_Unigene_008647	422	536	319	371	387	467	859	545	786	682	583	639	0.5082	0.00577442	0.016308	up	unnamed protein product [Coffea canephora]
BMK_Unigene_008650	1294	1315	1071	929	953	1193	2294	1581	2766	2153	2931	1983	0.8157	7.67366e-06	3.67993e-05	up	uncharacterized protein LOC111403998 isoform X1 [Olea europaea var. sylvestris]
BMK_Unigene_008651	89	122	48	45	115	106	396	319	307	259	349	343	1.707	4.3485e-11	3.84848e-10	up	RNA helicase, ATP-dependent DEAH box [Trema orientalis]
BMK_Unigene_008652	30	64	12	20	28	26	4	12	1	5	7	6	-2.4539	1.47884e-05	6.79531e-05	down	receptor-like cytosolic serine/threonine-protein kinase RBK2 [Olea europaea var. sylvestris]
BMK_Unigene_008661	207	184	194	195	134	115	280	283	291	379	359	288	0.6838	0.0106976	0.02823	up	PREDICTED: uncharacterized protein LOC109358864 [Lupinus angustifolius]
BMK_Unigene_008669	202	3	345	746	12	194	0	0	0	6	2	41	-5.2511	0.000398967	0.00144258	down	PREDICTED: uncharacterized protein LOC18607023 [Theobroma cacao]
BMK_Unigene_008671	1353	1243	1204	917	997	1019	1555	1695	1645	1682	1588	1733	0.3678	0.0386207	0.0860851	up	unnamed protein product, partial [Vitis vinifera]
BMK_Unigene_008675	70	108	29	10	112	29	20	15	32	22	43	28	-1.3958	0.0108997	0.0286935	down	hypothetical protein CUMW_205860 [Citrus unshiu]
BMK_Unigene_008677	1528	1365	1559	4455	1124	1672	382	267	630	768	482	493	-2.1901	1.90219e-07	1.1297e-06	down	Guanine nucleotide binding protein (G-protein), alpha subunit [Trema orientalis]
BMK_Unigene_008679	598	328	283	470	188	373	82	39	35	37	53	30	-3.1747	2.71676e-18	4.57443e-17	down	glycoprotein 3-alpha-L-fucosyltransferase A [Morus notabilis]
BMK_Unigene_008684	703	1611	249	271	845	417	2197	1423	1019	929	895	1397	0.7901	0.0338177	0.0767282	up	PREDICTED: probable disease resistance protein At4g27220 isoform X1 [Vitis vinifera]
BMK_Unigene_008685	275	468	277	238	365	316	1703	2275	1800	2850	2096	2154	2.5383	5.218e-28	1.79333e-26	up	uncharacterized protein LOC18035886 [Citrus clementina]
BMK_Unigene_008689	193	153	175	149	137	139	271	239	310	214	279	264	0.5358	0.0133223	0.0342554	up	AMSH-like ubiquitin thioesterase 1 isoform X1 [Hevea brasiliensis]
BMK_Unigene_008702	1130	603	581	614	759	658	590	447	660	795	667	553	-0.4294	0.0444487	0.0969721	down	uncharacterized protein LOC110810499 isoform X2 [Carica papaya]
BMK_Unigene_008705	310	205	191	142	303	233	2067	1156	1566	930	1553	2054	2.5277	2.18807e-22	4.99202e-21	up	probable beta-1,4-xylosyltransferase IRX10L [Sesamum indicum]
BMK_Unigene_008706	506	611	313	303	344	352	395	262	387	414	365	357	-0.3395	0.0436158	0.0953876	down	protein DCL, chloroplastic isoform X2 [Spinacia oleracea]
BMK_Unigene_008713	153	98	128	129	128	77	31	27	80	63	36	115	-1.2772	0.0009958	0.00333177	down	uncharacterized protein LOC111999343 [Quercus suber]
BMK_Unigene_008721	984	1009	650	858	789	781	550	608	880	806	633	574	-0.5243	0.00640025	0.0178862	down	mRNA-capping enzyme isoform X1 [Arachis ipaensis]
BMK_Unigene_008722	524	724	216	168	440	336	103	82	190	153	135	188	-1.7052	5.91553e-08	3.73749e-07	down	PREDICTED: uncharacterized protein LOC18613005 [Theobroma cacao]
BMK_Unigene_008723	1384	1481	1005	854	822	1132	2295	1646	3003	1174	2572	2365	0.769	0.00107791	0.00357979	up	uncharacterized protein LOC110673800 isoform X2 [Hevea brasiliensis]
[truncated: 16,498 more rows]

## Sheet: Table S3
Table S3 List of the KEGG pathway of DEG genes
[truncated: 139 more rows]

[truncated: 3 more sheets: Table S4, TableS5, Table S6]
